# Supplementary material for: Taxonomic revision of the Pheidole megacephala species-group (Hymenoptera, Formicidae) from the Malagasy Region
Source: PeerJ. 2022 Apr 26;10:e13263. doi: 10.7717/peerj.13263 (PMC9053301; doi:10.7717/peerj.13263)
Supplement: Supplemental Information 1 — Distribution records of specimens of the Pheidole megacephala species-group from Malagasy [file peerj-10-13263-s001.xlsx]

## Sheet: Sheet1
SpecimenCode	CollectionCode	Genus	Species	SpeciesCode	LifeStageSex	Medium	CollectedBy	DateCollected	Adm1	Country	Elevation(m)	Latitude	Longitude	BiogeographicRegion	OwnedBy	LocatedAt
CASENT0146856	BLF21213	Pheidole	megacephala	Pheidole.megacephala	2w.	pin	B.L.Fisher et al.	2009-01-27	Anjouan	Comoros	20 m	-12.2576	44.3892	Malagasy	CASC, San Francisco, CA, USA	CASC
CASENT0146859	BLF21214	Pheidole	megacephala	Pheidole.megacephala	2w.	pin	B.L.Fisher et al.	2009-01-27	Anjouan	Comoros	20 m	-12.2576	44.3892	Malagasy	CASC, San Francisco, CA, USA	CASC
CASENT0060294	BLF12325	Pheidole	megacephala	Pheidole.megacephala	1w.	pin	B.L.Fisher et al.	2005-06-06	Fianarantsoa	Madagascar	175 m	-21.4	47.94	Malagasy	CASC, San Francisco, CA, USA	CASC
CASENT0071167	BLF14323	Pheidole	megacephala	Pheidole.megacephala	1w.	pin	B.L.Fisher et al.	2006-04-25	Fianarantsoa	Madagascar	10 m	-22.8197	47.83	Malagasy	CASC, San Francisco, CA, USA	CASC
CASENT0071171	BLF14340	Pheidole	megacephala	Pheidole.megacephala	1w.	pin	B.L.Fisher et al.	2006-04-25	Fianarantsoa	Madagascar	10 m	-22.8197	47.83	Malagasy	CASC, San Francisco, CA, USA	CASC
CASENT0071184	BLF14338	Pheidole	megacephala	Pheidole.megacephala	1w.	pin	B.L.Fisher et al.	2006-04-25	Fianarantsoa	Madagascar	10 m	-22.8197	47.83	Malagasy	CASC, San Francisco, CA, USA	CASC
CASENT0071185	BLF14320	Pheidole	megacephala	Pheidole.megacephala	1w.	pin	B.L.Fisher et al.	2006-04-25	Fianarantsoa	Madagascar	10 m	-22.8197	47.83	Malagasy	CASC, San Francisco, CA, USA	CASC
CASENT0071186	BLF14326	Pheidole	megacephala	Pheidole.megacephala	1w., 1s.	pin	B.L.Fisher et al.	2006-04-25	Fianarantsoa	Madagascar	10 m	-22.8197	47.83	Malagasy	CASC, San Francisco, CA, USA	CASC
CASENT0071187	BLF14331	Pheidole	megacephala	Pheidole.megacephala	1w.	pin	B.L.Fisher et al.	2006-04-25	Fianarantsoa	Madagascar	10 m	-22.8197	47.83	Malagasy	CASC, San Francisco, CA, USA	CASC
CASENT0071192	BLF14337	Pheidole	megacephala	Pheidole.megacephala	1w., 1s.	pin	B.L.Fisher et al.	2006-04-25	Fianarantsoa	Madagascar	10 m	-22.8197	47.83	Malagasy	CASC, San Francisco, CA, USA	CASC
CASENT0071198	BLF14341	Pheidole	megacephala	Pheidole.megacephala	1w., 1s.	pin	B.L.Fisher et al.	2006-04-25	Fianarantsoa	Madagascar	10 m	-22.8197	47.83	Malagasy	CASC, San Francisco, CA, USA	CASC
CASENT0071783	BLF14364	Pheidole	megacephala	Pheidole.megacephala	1w.	pin	B.L.Fisher et al.	2006-04-25	Fianarantsoa	Madagascar	10 m	-22.1482	48.0227	Malagasy	CASC, San Francisco, CA, USA	CASC
CASENT0071790	BLF14360	Pheidole	megacephala	Pheidole.megacephala	1w., 1s.	pin	B.L.Fisher et al.	2006-04-25	Fianarantsoa	Madagascar	10 m	-22.1482	48.0227	Malagasy	CASC, San Francisco, CA, USA	CASC
CASENT0071792	BLF14353	Pheidole	megacephala	Pheidole.megacephala	1w.	pin	B.L.Fisher et al.	2006-04-25	Fianarantsoa	Madagascar	10 m	-22.1482	48.0227	Malagasy	CASC, San Francisco, CA, USA	CASC
CASENT0071795	BLF14355	Pheidole	megacephala	Pheidole.megacephala	1w., 1s.	pin	B.L.Fisher et al.	2006-04-25	Fianarantsoa	Madagascar	10 m	-22.1482	48.0227	Malagasy	CASC, San Francisco, CA, USA	CASC
CASENT0071797	BLF14359	Pheidole	megacephala	Pheidole.megacephala	1w.	pin	B.L.Fisher et al.	2006-04-25	Fianarantsoa	Madagascar	10 m	-22.1482	48.0227	Malagasy	CASC, San Francisco, CA, USA	CASC
CASENT0120476	BLF15976	Pheidole	megacephala	Pheidole.megacephala	1w., 1s.	pin	B.L.Fisher et al.	2006-12-10	Toliara	Madagascar	268 m	-23.2098	43.9458	Malagasy	CASC, San Francisco, CA, USA	CASC
CASENT0120780	BLF16834	Pheidole	megacephala	Pheidole.megacephala	1w., 1s.	pin	B.L.Fisher et al.	2007-02-18	Toamasina	Madagascar	15 m	-19.8993	48.8088	Malagasy	CASC, San Francisco, CA, USA	CASC
CASENT0120903	BLF16762	Pheidole	megacephala	Pheidole.megacephala	1w., 1q.	pin	B.L.Fisher et al.	2007-02-16	Toamasina	Madagascar	20 m	-18.1547	49.4127	Malagasy	CASC, San Francisco, CA, USA	CASC
CASENT0120904	BLF16762	Pheidole	megacephala	Pheidole.megacephala	1w., 1s.	pin	B.L.Fisher et al.	2007-02-16	Toamasina	Madagascar	20 m	-18.1547	49.4127	Malagasy	CASC, San Francisco, CA, USA	CASC
CASENT0120905	BLF16732	Pheidole	megacephala	Pheidole.megacephala	1w., 1s.	pin	B.L.Fisher et al.	2007-02-16	Toamasina	Madagascar	20 m	-18.1547	49.4127	Malagasy	CASC, San Francisco, CA, USA	CASC
CASENT0120909	BLF16730	Pheidole	megacephala	Pheidole.megacephala	1w., 1q.	pin	B.L.Fisher et al.	2007-02-16	Toamasina	Madagascar	20 m	-18.1547	49.4127	Malagasy	CASC, San Francisco, CA, USA	CASC
CASENT0120915	BLF16753	Pheidole	megacephala	Pheidole.megacephala	1w., 1s.	pin	B.L.Fisher et al.	2007-02-16	Toamasina	Madagascar	20 m	-18.1547	49.4127	Malagasy	CASC, San Francisco, CA, USA	CASC
CASENT0120952	BLF16729	Pheidole	megacephala	Pheidole.megacephala	1w., 1s.	pin	B.L.Fisher et al.	2007-02-16	Toamasina	Madagascar	20 m	-18.1547	49.4127	Malagasy	CASC, San Francisco, CA, USA	CASC
CASENT0120956	BLF16649	Pheidole	megacephala	Pheidole.MG158	1w., 1s.	pin	B.L.Fisher et al.	2007-02-14	Toamasina	Madagascar	922 m	-18.9442	48.2307	Malagasy	CASC, San Francisco, CA, USA	CASC
CASENT0120967	BLF16667	Pheidole	megacephala	Pheidole.megacephala	1w., 1s.	pin	B.L.Fisher et al.	2007-02-14	Toamasina	Madagascar	922 m	-18.9442	48.2307	Malagasy	CASC, San Francisco, CA, USA	CASC
CASENT0120982	BLF16672	Pheidole	megacephala	Pheidole.megacephala	1w., 1s.	pin	B.L.Fisher et al.	2007-02-14	Toamasina	Madagascar	922 m	-18.9442	48.2307	Malagasy	CASC, San Francisco, CA, USA	CASC
CASENT0120995	BLF16647	Pheidole	megacephala	Pheidole.megacephala	1w., 1s.	pin	B.L.Fisher et al.	2007-02-14	Toamasina	Madagascar	922 m	-18.9442	48.2307	Malagasy	CASC, San Francisco, CA, USA	CASC
CASENT0121696	BLF15098	Pheidole	megacephala	Pheidole.megacephala	1w., 1s.	pin	B.L.Fisher et al.	2006-11-20	Fianarantsoa	Madagascar	10 m	-23.3507	47.6045	Malagasy	CASC, San Francisco, CA, USA	CASC
CASENT0121714	BLF16446	Pheidole	megacephala	Pheidole.megacephala	1w., 1s.	pin	B.L.Fisher et al.	2007-02-05	Antananarivo	Madagascar	1550 m	-19.866	47.0355	Malagasy	CASC, San Francisco, CA, USA	CASC
CASENT0121737	BLF16452	Pheidole	megacephala	Pheidole.megacephala	1w., 1s.	pin	B.L.Fisher et al.	2007-02-05	Antananarivo	Madagascar	1550 m	-19.866	47.0355	Malagasy	CASC, San Francisco, CA, USA	CASC
CASENT0121775	BLF16849	Pheidole	megacephala	Pheidole.megacephala	1w., 1s.	pin	B.L.Fisher et al.	2007-02-18	Toamasina	Madagascar	15 m	-19.8993	48.8088	Malagasy	CASC, San Francisco, CA, USA	CASC
CASENT0121780	BLF16834	Pheidole	megacephala	Pheidole.MGs124	1s.	pin	B.L.Fisher et al.	2007-02-18	Toamasina	Madagascar	15 m	-19.8993	48.8088	Malagasy	CASC, San Francisco, CA, USA	CASC
CASENT0121873	BLF16083	Pheidole	megacephala	Pheidole.MG147	1w., 1s.	pin	B.L.Fisher et al.	2006-12-11	Toliara	Madagascar	20 m	-23.3575	43.669	Malagasy	CASC, San Francisco, CA, USA	CASC
CASENT0122012	BLF16196	Pheidole	megacephala	Pheidole.MG147	1w., 1s.	pin	B.L.Fisher et al.	2006-12-13	Fianarantsoa	Madagascar	1020 m	-21.8327	46.9387	Malagasy	CASC, San Francisco, CA, USA	CASC
CASENT0122038	BLF16145	Pheidole	megacephala	Pheidole.megacephala	1w., 1s.	pin	B.L.Fisher et al.	2006-12-11	Fianarantsoa	Madagascar	845 m	-22.5582	45.414	Malagasy	CASC, San Francisco, CA, USA	CASC
CASENT0122041	BLF16144	Pheidole	megacephala	Pheidole.megacephala	1w., 1s.	pin	B.L.Fisher et al.	2006-12-11	Fianarantsoa	Madagascar	845 m	-22.5582	45.414	Malagasy	CASC, San Francisco, CA, USA	CASC
CASENT0122042	BLF16146	Pheidole	megacephala	Pheidole.megacephala	1w., 1s.	pin	B.L.Fisher et al.	2006-12-11	Fianarantsoa	Madagascar	845 m	-22.5582	45.414	Malagasy	CASC, San Francisco, CA, USA	CASC
CASENT0122053	BLF16139	Pheidole	megacephala	Pheidole.megacephala	1w., 1s.	pin	B.L.Fisher et al.	2006-12-11	Fianarantsoa	Madagascar	845 m	-22.5582	45.414	Malagasy	CASC, San Francisco, CA, USA	CASC
CASENT0122054	BLF16127	Pheidole	megacephala	Pheidole.megacephala	1w., 1s.	pin	B.L.Fisher et al.	2006-12-11	Fianarantsoa	Madagascar	845 m	-22.5582	45.414	Malagasy	CASC, San Francisco, CA, USA	CASC
CASENT0122056	BLF16140	Pheidole	megacephala	Pheidole.megacephala	1w., 1s.	pin	B.L.Fisher et al.	2006-12-11	Fianarantsoa	Madagascar	845 m	-22.5582	45.414	Malagasy	CASC, San Francisco, CA, USA	CASC
CASENT0122224	BLF16697	Pheidole	megacephala	Pheidole.megacephala	1w., 1s.	pin	B.L.Fisher et al.	2007-02-15	Toamasina	Madagascar	24 m	-18.8218	49.0702	Malagasy	CASC, San Francisco, CA, USA	CASC
CASENT0122239	BLF16687	Pheidole	megacephala	Pheidole.megacephala	1w., 1s.	pin	B.L.Fisher et al.	2007-02-15	Toamasina	Madagascar	24 m	-18.8218	49.0702	Malagasy	CASC, San Francisco, CA, USA	CASC
CASENT0122245	BLF16717	Pheidole	megacephala	Pheidole.megacephala	1w., 1s.	pin	B.L.Fisher et al.	2007-02-15	Toamasina	Madagascar	24 m	-18.8218	49.0702	Malagasy	CASC, San Francisco, CA, USA	CASC
CASENT0122270	BLF16815	Pheidole	megacephala	Pheidole.megacephala	1w., 1s.	pin	B.L.Fisher et al.	2007-02-17	Toamasina	Madagascar	16 m	-19.3328	48.9795	Malagasy	CASC, San Francisco, CA, USA	CASC
CASENT0122280	BLF16790	Pheidole	megacephala	Pheidole.megacephala	1w., 1s.	pin	B.L.Fisher et al.	2007-02-17	Toamasina	Madagascar	16 m	-19.3328	48.9795	Malagasy	CASC, San Francisco, CA, USA	CASC
CASENT0122281	BLF16826	Pheidole	megacephala	Pheidole.megacephala	1w., 1s.	pin	B.L.Fisher et al.	2007-02-17	Toamasina	Madagascar	16 m	-19.3328	48.9795	Malagasy	CASC, San Francisco, CA, USA	CASC
CASENT0122478	BLF17820	Pheidole	megacephala	Pheidole.megacephala	1w., 1s.	pin	B.L.Fisher et al.	2007-07-22	Toamasina	Madagascar	19 m	-16.168	49.7677	Malagasy	CASC, San Francisco, CA, USA	CASC
CASENT0122481	BLF17843	Pheidole	megacephala	Pheidole.megacephala	1w., 1s.	pin	B.L.Fisher et al.	2007-07-22	Toamasina	Madagascar	19 m	-16.168	49.7677	Malagasy	CASC, San Francisco, CA, USA	CASC
CASENT0122482	BLF17839	Pheidole	megacephala	Pheidole.megacephala	1w., 1s.	pin	B.L.Fisher et al.	2007-07-22	Toamasina	Madagascar	19 m	-16.168	49.7677	Malagasy	CASC, San Francisco, CA, USA	CASC
CASENT0122484	BLF17847	Pheidole	megacephala	Pheidole.megacephala	1w., 1s., 1q.	pin	B.L.Fisher et al.	2007-07-22	Toamasina	Madagascar	19 m	-16.168	49.7677	Malagasy	CASC, San Francisco, CA, USA	CASC
CASENT0122498	BLF17844	Pheidole	megacephala	Pheidole.megacephala	1w., 1s.	pin	B.L.Fisher et al.	2007-07-22	Toamasina	Madagascar	19 m	-16.168	49.7677	Malagasy	CASC, San Francisco, CA, USA	CASC
CASENT0122934	BLF16342	Pheidole	megacephala	Pheidole.megacephala	1w., 1s.	pin	B.L.Fisher et al.	2007-02-01	Toliara	Madagascar	80 m	-19.5232	45.4575	Malagasy	CASC, San Francisco, CA, USA	CASC
CASENT0123090	BLF16793	Pheidole	megacephala	Pheidole.megacephala	1w., 1s.	pin	B.L.Fisher et al.	2007-02-17	Toamasina	Madagascar	16 m	-19.3328	48.9795	Malagasy	CASC, San Francisco, CA, USA	CASC
CASENT0123476	BLF16804	Pheidole	megacephala	Pheidole.MG158	1w., 1s.	pin	B.L.Fisher et al.	2007-02-17	Toamasina	Madagascar	16 m	-19.3328	48.9795	Malagasy	CASC, San Francisco, CA, USA	CASC
CASENT0125572	BLF17275	Pheidole	megacephala	Pheidole.megacephala	1w., 1s.	pin	B.L.Fisher et al.	2007-03-30	Antsiranana	Madagascar	61 m	-13.1973	49.0487	Malagasy	CASC, San Francisco, CA, USA	CASC
CASENT0125693	BLF17378	Pheidole	megacephala	Pheidole.megacephala	1w., 1s.	pin	B.L.Fisher et al.	2007-04-26	Antananarivo	Madagascar	1385 m	-18.8542	47.5658	Malagasy	CASC, San Francisco, CA, USA	CASC
CASENT0125941	BLF17370	Pheidole	megacephala	Pheidole.MG145	1w., 1s.	pin	B.L.Fisher et al.	2007-04-26	Antananarivo	Madagascar	1385 m	-18.8542	47.5658	Malagasy	CASC, San Francisco, CA, USA	CASC
CASENT0125950	BLF17377	Pheidole	megacephala	Pheidole.megacephala	1w., 1s.	pin	B.L.Fisher et al.	2007-04-26	Antananarivo	Madagascar	1385 m	-18.8542	47.5658	Malagasy	CASC, San Francisco, CA, USA	CASC
CASENT0125961	BLF17375	Pheidole	megacephala	Pheidole.megacephala	1w., 1s.	pin	B.L.Fisher et al.	2007-04-26	Antananarivo	Madagascar	1385 m	-18.8542	47.5658	Malagasy	CASC, San Francisco, CA, USA	CASC
CASENT0125965	BLF17373	Pheidole	megacephala	Pheidole.megacephala	1w., 1s.	pin	B.L.Fisher et al.	2007-04-26	Antananarivo	Madagascar	1385 m	-18.8542	47.5658	Malagasy	CASC, San Francisco, CA, USA	CASC
CASENT0128124	BLF17934	Pheidole	megacephala	Pheidole.megacephala	1w., 1s.	pin	B.L.Fisher et al.	2007-07-28	Toamasina	Madagascar	19 m	-15.4344	49.7391	Malagasy	CASC, San Francisco, CA, USA	CASC
CASENT0128129	BLF17952	Pheidole	megacephala	Pheidole.megacephala	1w., 1q.	pin	B.L.Fisher et al.	2007-07-28	Toamasina	Madagascar	19 m	-15.4344	49.7391	Malagasy	CASC, San Francisco, CA, USA	CASC
CASENT0128130	BLF17952	Pheidole	megacephala	Pheidole.megacephala	1w., 1s.	pin	B.L.Fisher et al.	2007-07-28	Toamasina	Madagascar	19 m	-15.4344	49.7391	Malagasy	CASC, San Francisco, CA, USA	CASC
CASENT0128132	BLF17942	Pheidole	megacephala	Pheidole.megacephala	1w., 1s.	pin	B.L.Fisher et al.	2007-07-28	Toamasina	Madagascar	19 m	-15.4344	49.7391	Malagasy	CASC, San Francisco, CA, USA	CASC
CASENT0128586	BLF17940	Pheidole	megacephala	Pheidole.megacephala	1w., 1q.	pin	B.L.Fisher et al.	2007-07-28	Toamasina	Madagascar	19 m	-15.4344	49.7391	Malagasy	CASC, San Francisco, CA, USA	CASC
CASENT0128692	BLF17826	Pheidole	megacephala	Pheidole.megacephala	1w., 1s.	pin	B.L.Fisher et al.	2007-07-22	Toamasina	Madagascar	19 m	-16.168	49.7677	Malagasy	CASC, San Francisco, CA, USA	CASC
CASENT0141954	BLF19541	Pheidole	megacephala	Pheidole.megacephala	1w.	pin	B.L.Fisher et al.	2007-12-15	Toamasina	Madagascar	500 m	-17.918	49.2007	Malagasy	CASC, San Francisco, CA, USA	CASC
CASENT0145091	BLF19593_58	Pheidole	megacephala	Pheidole.megacephala	1w.	pin	B.L.Fisher	2009-01-25	Toamasina	Madagascar	550 m	-17.9161	49.2019	Malagasy	CASC, San Francisco, CA, USA	CASC
CASENT0196672	BLF01370	Pheidole	megacephala	Pheidole.megacephala	3w.	pin	B.L.Fisher	1997-04-06	Toamasina	Madagascar	10 m	-17.2825	49.43	Malagasy	CASC, San Francisco, CA, USA	CASC
CASENT0196762	BLF01452	Pheidole	megacephala	Pheidole.megacephala	1w., 2s.	pin	B.L.Fisher	1997-04-12	Toamasina	Madagascar	10 m	-17.2825	49.43	Malagasy	CASC, San Francisco, CA, USA	CASC
CASENT0196764	BLF01370	Pheidole	megacephala	Pheidole.megacephala	1w., 2s.	pin	B.L.Fisher	1997-04-06	Toamasina	Madagascar	10 m	-17.2825	49.43	Malagasy	CASC, San Francisco, CA, USA	CASC
CASENT0198340	BLF01377	Pheidole	megacephala	Pheidole.megacephala	1w., 1q.	pin	B.L.Fisher	1997-04-06	Toamasina	Madagascar	10 m	-17.2825	49.43	Malagasy	CASC, San Francisco, CA, USA	CASC
CASENT0801043	BLF40020	Pheidole	megacephala	Pheidole.megacephala	1w.	pin	B.L.Fisher et al.	2017-03-06	Toamasina	Madagascar	52 m	-17.7055	49.4593	Malagasy	CASC, San Francisco, CA, USA	CASC
CASENT0801067	BLF40108	Pheidole	megacephala	Pheidole.megacephala	1w., 1s.	pin	B.L.Fisher et al.	2017-03-09	Toamasina	Madagascar	48 m	-17.7027	49.4562	Malagasy	CASC, San Francisco, CA, USA	CASC
CASENT0801084	BLF40131	Pheidole	megacephala	Pheidole.megacephala	1w.	pin	B.L.Fisher et al.	2017-03-09	Toamasina	Madagascar	48 m	-17.7027	49.4562	Malagasy	CASC, San Francisco, CA, USA	CASC
CASENT0110350	BLF16602	Pheidole	megacephala	Pheidole.megacephala	1w., 1s.	pin	B.L.Fisher et al.	2007-02-09	Antananarivo	Madagascar	1241 m	-18.3162	47.1158	Malagasy	CASC, San Francisco, CA, USA	CASC
CASENT0110351	BLF16602	Pheidole	megacephala	Pheidole.megacephala	1w., 1s.	pin	B.L.Fisher et al.	2007-02-09	Antananarivo	Madagascar	1241 m	-18.3162	47.1158	Malagasy	CASC, San Francisco, CA, USA	CASC
CASENT0110364	BLF16591	Pheidole	megacephala	Pheidole.megacephala	1w.	pin	B.L.Fisher et al.	2007-02-09	Antananarivo	Madagascar	1241 m	-18.3162	47.1158	Malagasy	CASC, San Francisco, CA, USA	CASC
CASENT0055882	BLF12059	Pheidole	megacephala	Pheidole.megacephala	1w.	pin	B.L.Fisher et al.	2005-05-27		Mauritius	375 m	-20.3328	57.723	Malagasy	CASC, San Francisco, CA, USA	CASC
CASENT0055883	BLF12059	Pheidole	megacephala	Pheidole.megacephala	1w.	pin	B.L.Fisher et al.	2005-05-27		Mauritius	375 m	-20.3328	57.723	Malagasy	CASC, San Francisco, CA, USA	CASC
CASENT0055884	BLF12059	Pheidole	megacephala	Pheidole.megacephala	1w.	pin	B.L.Fisher et al.	2005-05-27		Mauritius	375 m	-20.3328	57.723	Malagasy	CASC, San Francisco, CA, USA	CASC
CASENT0055885	BLF12059	Pheidole	megacephala	Pheidole.megacephala	1w.	pin	B.L.Fisher et al.	2005-05-27		Mauritius	375 m	-20.3328	57.723	Malagasy	CASC, San Francisco, CA, USA	CASC
CASENT0055886	BLF12059	Pheidole	megacephala	Pheidole.megacephala	1w.	pin	B.L.Fisher et al.	2005-05-27		Mauritius	375 m	-20.3328	57.723	Malagasy	CASC, San Francisco, CA, USA	CASC
CASENT0055903	BLF12053	Pheidole	megacephala	Pheidole.megacephala	1w.	pin	B.L.Fisher et al.	2005-05-27		Mauritius	375 m	-20.3328	57.723	Malagasy	CASC, San Francisco, CA, USA	CASC
CASENT0055904	BLF12053	Pheidole	megacephala	Pheidole.megacephala	1w.	pin	B.L.Fisher et al.	2005-05-27		Mauritius	375 m	-20.3328	57.723	Malagasy	CASC, San Francisco, CA, USA	CASC
CASENT0055905	BLF12047	Pheidole	megacephala	Pheidole.megacephala	1w.	pin	B.L.Fisher et al.	2005-05-27		Mauritius	375 m	-20.3328	57.723	Malagasy	CASC, San Francisco, CA, USA	CASC
CASENT0055944	BLF12037	Pheidole	megacephala	Pheidole.megacephala	1w.	pin	B.L.Fisher et al.	2005-05-26		Mauritius	770 m	-20.1922	57.5553	Malagasy	CASC, San Francisco, CA, USA	CASC
CASENT0055945	BLF12037	Pheidole	megacephala	Pheidole.megacephala	1w.	pin	B.L.Fisher et al.	2005-05-26		Mauritius	770 m	-20.1922	57.5553	Malagasy	CASC, San Francisco, CA, USA	CASC
CASENT0055946	BLF12037	Pheidole	megacephala	Pheidole.megacephala	1w.	pin	B.L.Fisher et al.	2005-05-26		Mauritius	770 m	-20.1922	57.5553	Malagasy	CASC, San Francisco, CA, USA	CASC
CASENT0055947	BLF12037	Pheidole	megacephala	Pheidole.megacephala	1w.	pin	B.L.Fisher et al.	2005-05-26		Mauritius	770 m	-20.1922	57.5553	Malagasy	CASC, San Francisco, CA, USA	CASC
CASENT0055951	BLF12036	Pheidole	megacephala	Pheidole.megacephala	1w.	pin	B.L.Fisher et al.	2005-05-26		Mauritius	770 m	-20.1922	57.5553	Malagasy	CASC, San Francisco, CA, USA	CASC
CASENT0055952	BLF12035	Pheidole	megacephala	Pheidole.megacephala	1w.	pin	B.L.Fisher et al.	2005-05-26		Mauritius	770 m	-20.1922	57.5553	Malagasy	CASC, San Francisco, CA, USA	CASC
CASENT0055953	BLF12035	Pheidole	megacephala	Pheidole.megacephala	1w.	pin	B.L.Fisher et al.	2005-05-26		Mauritius	770 m	-20.1922	57.5553	Malagasy	CASC, San Francisco, CA, USA	CASC
CASENT0055954	BLF12035	Pheidole	megacephala	Pheidole.megacephala	2w.	pin	B.L.Fisher et al.	2005-05-26		Mauritius	770 m	-20.1922	57.5553	Malagasy	CASC, San Francisco, CA, USA	CASC
CASENT0055955	BLF12035	Pheidole	megacephala	Pheidole.megacephala	1w.	pin	B.L.Fisher et al.	2005-05-26		Mauritius	770 m	-20.1922	57.5553	Malagasy	CASC, San Francisco, CA, USA	CASC
CASENT0055956	BLF12035	Pheidole	megacephala	Pheidole.megacephala	1w.	pin	B.L.Fisher et al.	2005-05-26		Mauritius	770 m	-20.1922	57.5553	Malagasy	CASC, San Francisco, CA, USA	CASC
CASENT0055957	BLF12035	Pheidole	megacephala	Pheidole.megacephala	2w.	pin	B.L.Fisher et al.	2005-05-26		Mauritius	770 m	-20.1922	57.5553	Malagasy	CASC, San Francisco, CA, USA	CASC
CASENT0056004	BLF12007	Pheidole	megacephala	Pheidole.megacephala	2w.	pin	B.L.Fisher et al.	2005-05-25		Mauritius	750 m	-20.1985	57.529	Malagasy	CASC, San Francisco, CA, USA	CASC
CASENT0056005	BLF12007	Pheidole	megacephala	Pheidole.megacephala	1w.	pin	B.L.Fisher et al.	2005-05-25		Mauritius	750 m	-20.1985	57.529	Malagasy	CASC, San Francisco, CA, USA	CASC
CASENT0056006	BLF12007	Pheidole	megacephala	Pheidole.megacephala	1w.	pin	B.L.Fisher et al.	2005-05-25		Mauritius	750 m	-20.1985	57.529	Malagasy	CASC, San Francisco, CA, USA	CASC
CASENT0056007	BLF12007	Pheidole	megacephala	Pheidole.megacephala	1w.	pin	B.L.Fisher et al.	2005-05-25		Mauritius	750 m	-20.1985	57.529	Malagasy	CASC, San Francisco, CA, USA	CASC
CASENT0056008	BLF12007	Pheidole	megacephala	Pheidole.megacephala	1w.	pin	B.L.Fisher et al.	2005-05-25		Mauritius	750 m	-20.1985	57.529	Malagasy	CASC, San Francisco, CA, USA	CASC
CASENT0056009	BLF12007	Pheidole	megacephala	Pheidole.megacephala	1w.	pin	B.L.Fisher et al.	2005-05-25		Mauritius	750 m	-20.1985	57.529	Malagasy	CASC, San Francisco, CA, USA	CASC
CASENT0056011	BLF12002	Pheidole	megacephala	Pheidole.megacephala	1w.	pin	B.L.Fisher et al.	2005-05-25		Mauritius	750 m	-20.1985	57.529	Malagasy	CASC, San Francisco, CA, USA	CASC
CASENT0056012	BLF12002	Pheidole	megacephala	Pheidole.megacephala	1w.	pin	B.L.Fisher et al.	2005-05-25		Mauritius	750 m	-20.1985	57.529	Malagasy	CASC, San Francisco, CA, USA	CASC
CASENT0056013	BLF12002	Pheidole	megacephala	Pheidole.megacephala	1w.	pin	B.L.Fisher et al.	2005-05-25		Mauritius	750 m	-20.1985	57.529	Malagasy	CASC, San Francisco, CA, USA	CASC
CASENT0056014	BLF12003	Pheidole	megacephala	Pheidole.megacephala	2w.	pin	B.L.Fisher et al.	2005-05-25		Mauritius	750 m	-20.1985	57.529	Malagasy	CASC, San Francisco, CA, USA	CASC
CASENT0056015	BLF12003	Pheidole	megacephala	Pheidole.megacephala	1w.	pin	B.L.Fisher et al.	2005-05-25		Mauritius	750 m	-20.1985	57.529	Malagasy	CASC, San Francisco, CA, USA	CASC
CASENT0056016	BLF12003	Pheidole	megacephala	Pheidole.megacephala	1w.	pin	B.L.Fisher et al.	2005-05-25		Mauritius	750 m	-20.1985	57.529	Malagasy	CASC, San Francisco, CA, USA	CASC
CASENT0056017	BLF12003	Pheidole	megacephala	Pheidole.megacephala	1w.	pin	B.L.Fisher et al.	2005-05-25		Mauritius	750 m	-20.1985	57.529	Malagasy	CASC, San Francisco, CA, USA	CASC
CASENT0056018	BLF12003	Pheidole	megacephala	Pheidole.megacephala	1w.	pin	B.L.Fisher et al.	2005-05-25		Mauritius	750 m	-20.1985	57.529	Malagasy	CASC, San Francisco, CA, USA	CASC
CASENT0056019	BLF12003	Pheidole	megacephala	Pheidole.megacephala	1w.	pin	B.L.Fisher et al.	2005-05-25		Mauritius	750 m	-20.1985	57.529	Malagasy	CASC, San Francisco, CA, USA	CASC
CASENT0056486	BLF12122	Pheidole	megacephala	Pheidole.megacephala	2w.	pin	B.L.Fisher et al.	2005-05-29		Mauritius	750 m	-20.4088	57.4077	Malagasy	CASC, San Francisco, CA, USA	CASC
CASENT0059592	BLF12028	Pheidole	megacephala	Pheidole.megacephala	1w.	pin	B.L.Fisher et al.	2005-05-26		Mauritius	770 m	-20.1922	57.5553	Malagasy	CASC, San Francisco, CA, USA	CASC
CASENT0059593	BLF12028	Pheidole	megacephala	Pheidole.megacephala	1w.	pin	B.L.Fisher et al.	2005-05-26		Mauritius	770 m	-20.1922	57.5553	Malagasy	CASC, San Francisco, CA, USA	CASC
CASENT0059594	BLF12028	Pheidole	megacephala	Pheidole.megacephala	1w.	pin	B.L.Fisher et al.	2005-05-26		Mauritius	770 m	-20.1922	57.5553	Malagasy	CASC, San Francisco, CA, USA	CASC
CASENT0059595	BLF12028	Pheidole	megacephala	Pheidole.megacephala	2w.	pin	B.L.Fisher et al.	2005-05-26		Mauritius	770 m	-20.1922	57.5553	Malagasy	CASC, San Francisco, CA, USA	CASC
CASENT0059597	BLF12028	Pheidole	megacephala	Pheidole.megacephala	1w.	pin	B.L.Fisher et al.	2005-05-26		Mauritius	770 m	-20.1922	57.5553	Malagasy	CASC, San Francisco, CA, USA	CASC
CASENT0059652	BLF12051	Pheidole	megacephala	Pheidole.megacephala	2w.	pin	B.L.Fisher et al.	2005-05-27		Mauritius	375 m	-20.3328	57.723	Malagasy	CASC, San Francisco, CA, USA	CASC
CASENT0059653	BLF12051	Pheidole	megacephala	Pheidole.megacephala	1w.	pin	B.L.Fisher et al.	2005-05-27		Mauritius	375 m	-20.3328	57.723	Malagasy	CASC, San Francisco, CA, USA	CASC
CASENT0059654	BLF12051	Pheidole	megacephala	Pheidole.megacephala	1w.	pin	B.L.Fisher et al.	2005-05-27		Mauritius	375 m	-20.3328	57.723	Malagasy	CASC, San Francisco, CA, USA	CASC
CASENT0059655	BLF12051	Pheidole	megacephala	Pheidole.megacephala	1w.	pin	B.L.Fisher et al.	2005-05-27		Mauritius	375 m	-20.3328	57.723	Malagasy	CASC, San Francisco, CA, USA	CASC
CASENT0059656	BLF12051	Pheidole	megacephala	Pheidole.megacephala	1w.	pin	B.L.Fisher et al.	2005-05-27		Mauritius	375 m	-20.3328	57.723	Malagasy	CASC, San Francisco, CA, USA	CASC
CASENT0059657	BLF12051	Pheidole	megacephala	Pheidole.megacephala	1w.	pin	B.L.Fisher et al.	2005-05-27		Mauritius	375 m	-20.3328	57.723	Malagasy	CASC, San Francisco, CA, USA	CASC
CASENT0059671	BLF12055	Pheidole	megacephala	Pheidole.megacephala	2w.	pin	B.L.Fisher et al.	2005-05-27		Mauritius	375 m	-20.3328	57.723	Malagasy	CASC, San Francisco, CA, USA	CASC
CASENT0059672	BLF12055	Pheidole	megacephala	Pheidole.megacephala	2w.	pin	B.L.Fisher et al.	2005-05-27		Mauritius	375 m	-20.3328	57.723	Malagasy	CASC, San Francisco, CA, USA	CASC
CASENT0059673	BLF12055	Pheidole	megacephala	Pheidole.megacephala	2w.	pin	B.L.Fisher et al.	2005-05-27		Mauritius	375 m	-20.3328	57.723	Malagasy	CASC, San Francisco, CA, USA	CASC
CASENT0059674	BLF12055	Pheidole	megacephala	Pheidole.megacephala	1w.	pin	B.L.Fisher et al.	2005-05-27		Mauritius	375 m	-20.3328	57.723	Malagasy	CASC, San Francisco, CA, USA	CASC
CASENT0060108	BLF12131	Pheidole	megacephala	Pheidole.megacephala	1w.	pin	B.L.Fisher et al.	2005-05-29		Mauritius	480 m	-20.4532	57.4777	Malagasy	CASC, San Francisco, CA, USA	CASC
CASENT0060399	BLF12085	Pheidole	megacephala	Pheidole.megacephala	1w.	pin	B.L.Fisher et al.	2005-05-28		Mauritius	1 m	-20.4188	57.7305	Malagasy	CASC, San Francisco, CA, USA	CASC
CASENT0104990	BLF12051	Pheidole	megacephala	Pheidole.megacephala	1s.	pin	B.L.Fisher et al.	2005-05-27		Mauritius	375 m	-20.3328	57.723	Malagasy	CASC, San Francisco, CA, USA	CASC
CASENT0132247	BLF18848	Pheidole	megacephala	Pheidole.megacephala	1w.	pin	B.L.Fisher et al.	2007-11-27		Mayotte	1 m	-12.9749	45.1618	Malagasy	CASC, San Francisco, CA, USA	CASC
CASENT0132442	BLF18834	Pheidole	megacephala	Pheidole.megacephala	2w.	pin	B.L.Fisher et al.	2007-11-27		Mayotte	35 m	-12.9784	45.1726	Malagasy	CASC, San Francisco, CA, USA	CASC
CASENT0133311	BLF18962	Pheidole	megacephala	Pheidole.decepticon	1w.	pin	B.L.Fisher et al.	2007-11-30		Mayotte	425 m	-12.8758	45.1567	Malagasy	CASC, San Francisco, CA, USA	CASC
CASENT0134868	BLF18766	Pheidole	megacephala	Pheidole.megacephala	2w.	pin	B.L.Fisher et al.	2007-11-26		Mayotte	10 m	-12.7575	45.0678	Malagasy	CASC, San Francisco, CA, USA	CASC
CASENT0134925	BLF18815	Pheidole	megacephala	Pheidole.megacephala	1w., 1s.	pin	B.L.Fisher et al.	2007-11-26		Mayotte	5 m	-12.7926	45.1076	Malagasy	CASC, San Francisco, CA, USA	CASC
CASENT0109846	BLF17648	Pheidole	megacephala	Pheidole.megacephala	1w., 1s.	pin	B.L.Fisher et al.	2007-05-20		Reunion	580 m	-20.9293	55.3888	Malagasy	CASC, San Francisco, CA, USA	CASC
CASENT0109848	BLF17654	Pheidole	megacephala	Pheidole.megacephala	1w., 1s.	pin	B.L.Fisher et al.	2007-05-20		Reunion	580 m	-20.9293	55.3888	Malagasy	CASC, San Francisco, CA, USA	CASC
CASENT0109849	BLF17640	Pheidole	megacephala	Pheidole.megacephala	1w., 1s.	pin	B.L.Fisher et al.	2007-05-20		Reunion	580 m	-20.9293	55.3888	Malagasy	CASC, San Francisco, CA, USA	CASC
CASENT0109852	BLF17646	Pheidole	megacephala	Pheidole.megacephala	1w., 1s.	pin	B.L.Fisher et al.	2007-05-20		Reunion	580 m	-20.9293	55.3888	Malagasy	CASC, San Francisco, CA, USA	CASC
CASENT0109854	BLF17653	Pheidole	megacephala	Pheidole.megacephala	1w., 1s.	pin	B.L.Fisher et al.	2007-05-20		Reunion	580 m	-20.9293	55.3888	Malagasy	CASC, San Francisco, CA, USA	CASC
CASENT0109855	BLF17642	Pheidole	megacephala	Pheidole.megacephala	1w., 1s.	pin	B.L.Fisher et al.	2007-05-20		Reunion	580 m	-20.9293	55.3888	Malagasy	CASC, San Francisco, CA, USA	CASC
CASENT0125106	BLF17660	Pheidole	megacephala	Pheidole.megacephala	1w.	pin	B.L.Fisher et al.	2007-05-20		Reunion	665 m	-20.9308	55.3897	Malagasy	CASC, San Francisco, CA, USA	CASC
CASENT0125139	BLF17729	Pheidole	megacephala	Pheidole.megacephala	1w.	pin	B.L.Fisher et al.	2007-05-22		Reunion	30 m	-21.3642	55.7435	Malagasy	CASC, San Francisco, CA, USA	CASC
CASENT0125209	BLF17690	Pheidole	megacephala	Pheidole.megacephala	1w., 1q.	pin	B.L.Fisher et al.	2007-05-21		Reunion	10 m	-20.8862	55.4847	Malagasy	CASC, San Francisco, CA, USA	CASC
CASENT0125210	BLF17690	Pheidole	megacephala	Pheidole.megacephala	1w., 1s.	pin	B.L.Fisher et al.	2007-05-21		Reunion	10 m	-20.8862	55.4847	Malagasy	CASC, San Francisco, CA, USA	CASC
CASENT0125212	BLF17695	Pheidole	megacephala	Pheidole.megacephala	1w., 1s.	pin	B.L.Fisher et al.	2007-05-21		Reunion	10 m	-20.8862	55.4847	Malagasy	CASC, San Francisco, CA, USA	CASC
CASENT0125213	BLF17695	Pheidole	megacephala	Pheidole.megacephala	1w., 1q.	pin	B.L.Fisher et al.	2007-05-21		Reunion	10 m	-20.8862	55.4847	Malagasy	CASC, San Francisco, CA, USA	CASC
CASENT0125219	BLF17697	Pheidole	megacephala	Pheidole.megacephala	1w., 1s.	pin	B.L.Fisher et al.	2007-05-21		Reunion	10 m	-20.8862	55.4847	Malagasy	CASC, San Francisco, CA, USA	CASC
CASENT0125227	BLF17693	Pheidole	megacephala	Pheidole.megacephala	1w.	pin	B.L.Fisher et al.	2007-05-21		Reunion	10 m	-20.8862	55.4847	Malagasy	CASC, San Francisco, CA, USA	CASC
CASENT0125351	BLF17681	Pheidole	megacephala	Pheidole.megacephala	1w., 1s.	pin	B.L.Fisher et al.	2007-05-21		Reunion	20 m	-21.0855	55.2275	Malagasy	CASC, San Francisco, CA, USA	CASC
CASENT0125354	BLF17682	Pheidole	megacephala	Pheidole.megacephala	1w., 1s.	pin	B.L.Fisher et al.	2007-05-21		Reunion	20 m	-21.0855	55.2275	Malagasy	CASC, San Francisco, CA, USA	CASC
CASENT0125892	BLF17727	Pheidole	megacephala	Pheidole.megacephala	1w.	pin	B.L.Fisher et al.	2007-05-22		Reunion	30 m	-21.3642	55.7435	Malagasy	CASC, San Francisco, CA, USA	CASC
CASENT0135273	BLF17727	Pheidole	megacephala	Pheidole.megacephala	1w.	pin	B.L.Fisher et al.	2007-05-22		Reunion	30 m	-21.3642	55.7435	Malagasy	CASC, San Francisco, CA, USA	CASC
CASENT0135341	BLF17727	Pheidole	megacephala	Pheidole.megacephala	1w.	pin	B.L.Fisher et al.	2007-05-22		Reunion	30 m	-21.3642	55.7435	Malagasy	CASC, San Francisco, CA, USA	CASC
CASENT0135513	BLF17655	Pheidole	megacephala	Pheidole.megacephala	1w., 1s.	pin	B.L.Fisher et al.	2007-05-20		Reunion	580 m	-20.9293	55.3888	Malagasy	CASC, San Francisco, CA, USA	CASC
CASENT0135515	BLF17655	Pheidole	megacephala	Pheidole.megacephala	1w.	pin	B.L.Fisher et al.	2007-05-20		Reunion	580 m	-20.9293	55.3888	Malagasy	CASC, San Francisco, CA, USA	CASC
CASENT0135517	BLF17655	Pheidole	megacephala	Pheidole.megacephala	1w., 1s.	pin	B.L.Fisher et al.	2007-05-20		Reunion	580 m	-20.9293	55.3888	Malagasy	CASC, San Francisco, CA, USA	CASC
CASENT0135518	BLF17655	Pheidole	megacephala	Pheidole.megacephala	1w., 1s.	pin	B.L.Fisher et al.	2007-05-20		Reunion	580 m	-20.9293	55.3888	Malagasy	CASC, San Francisco, CA, USA	CASC
CASENT0264742	BLF26407	Pheidole	megacephala	Pheidole.megacephala	2w.	pin	B.L.Fisher	2011-03-31		Reunion	1575 m	-21.1116	55.4493	Malagasy	CASC, San Francisco, CA, USA	CASC
CASENT0136803	BLF19673	Pheidole	megacephala	Pheidole.megacephala	1w., 1s.	pin	B.L.Fisher	2008-03-07		Seychelles	60 m	-4.35009	55.6468	Malagasy	CASC, San Francisco, CA, USA	CASC
CASENT0136806	BLF19679	Pheidole	megacephala	Pheidole.megacephala	1w.	pin	B.L.Fisher	2008-03-07		Seychelles	60 m	-4.35009	55.6468	Malagasy	CASC, San Francisco, CA, USA	CASC
CASENT0137003	BLF19685	Pheidole	megacephala	Pheidole.megacephala	1w.	pin	B.L.Fisher	2008-03-07		Seychelles	60 m	-4.35009	55.6468	Malagasy	CASC, San Francisco, CA, USA	CASC
CASENT0137005	BLF19685	Pheidole	megacephala	Pheidole.megacephala	1w.	pin	B.L.Fisher	2008-03-07		Seychelles	60 m	-4.35009	55.6468	Malagasy	CASC, San Francisco, CA, USA	CASC
CASENT0137014	BLF19686	Pheidole	megacephala	Pheidole.megacephala	1w.	pin	B.L.Fisher	2008-03-08		Seychelles	360 m	-4.712	55.5019	Malagasy	CASC, San Francisco, CA, USA	CASC
CASENT0137015	BLF19686	Pheidole	megacephala	Pheidole.megacephala	1w.	pin	B.L.Fisher	2008-03-08		Seychelles	360 m	-4.712	55.5019	Malagasy	CASC, San Francisco, CA, USA	CASC
CASENT0145384	BLF24158	Pheidole	megacephala	Pheidole.megacephala	1w., 1s.	pin	B.L.Fisher et al.	2010-02-10		Seychelles	480 m	-4.65988	55.4374	Malagasy	CASC, San Francisco, CA, USA	CASC
CASENT0158863	BLF23912	Pheidole	megacephala	Pheidole.megacephala	1w., 1q.	pin	B.L.Fisher et al.	2010-02-05		Seychelles	10 m	-4.21407	55.6682	Malagasy	CASC, San Francisco, CA, USA	CASC
CASENT0158871	BLF23906	Pheidole	megacephala	Pheidole.megacephala	1w., 1s.	pin	B.L.Fisher et al.	2010-02-05		Seychelles	10 m	-4.21407	55.6682	Malagasy	CASC, San Francisco, CA, USA	CASC
CASENT0158882	BLF23909	Pheidole	megacephala	Pheidole.megacephala	1w., 1s.	pin	B.L.Fisher et al.	2010-02-05		Seychelles	10 m	-4.21407	55.6682	Malagasy	CASC, San Francisco, CA, USA	CASC
CASENT0158883	BLF23938	Pheidole	megacephala	Pheidole.megacephala	1w., 1s.	pin	B.L.Fisher et al.	2010-02-05		Seychelles	10 m	-4.21407	55.6682	Malagasy	CASC, San Francisco, CA, USA	CASC
CASENT0158884	BLF23932	Pheidole	megacephala	Pheidole.megacephala	1w., 1s.	pin	B.L.Fisher et al.	2010-02-05		Seychelles	10 m	-4.21407	55.6682	Malagasy	CASC, San Francisco, CA, USA	CASC
CASENT0158886	BLF23922	Pheidole	megacephala	Pheidole.megacephala	1w., 1s.	pin	B.L.Fisher et al.	2010-02-05		Seychelles	10 m	-4.21407	55.6682	Malagasy	CASC, San Francisco, CA, USA	CASC
CASENT0158889	BLF23943	Pheidole	megacephala	Pheidole.megacephala	1w.	pin	B.L.Fisher et al.	2010-02-05		Seychelles	10 m	-4.21407	55.6682	Malagasy	CASC, San Francisco, CA, USA	CASC
CASENT0158925	BLF24055	Pheidole	megacephala	Pheidole.megacephala	1w.	pin	B.L.Fisher et al.	2010-02-09		Seychelles	150 m	-4.67494	55.4982	Malagasy	CASC, San Francisco, CA, USA	CASC
CASENT0159001	BLF24061	Pheidole	megacephala	Pheidole.megacephala	1w., 1s.	pin	B.L.Fisher et al.	2010-02-09		Seychelles	150 m	-4.67494	55.4982	Malagasy	CASC, San Francisco, CA, USA	CASC
CASENT0159004	BLF24068	Pheidole	megacephala	Pheidole.megacephala	1w., 1s.	pin	B.L.Fisher et al.	2010-02-09		Seychelles	150 m	-4.67494	55.4982	Malagasy	CASC, San Francisco, CA, USA	CASC
CASENT0159007	BLF24063	Pheidole	megacephala	Pheidole.megacephala	1w., 1s.	pin	B.L.Fisher et al.	2010-02-09		Seychelles	150 m	-4.67494	55.4982	Malagasy	CASC, San Francisco, CA, USA	CASC
CASENT0159407	BLF24028	Pheidole	megacephala	Pheidole.megacephala	1w.	pin	B.L.Fisher et al.	2010-02-08		Seychelles	520 m	-4.65121	55.4584	Malagasy	CASC, San Francisco, CA, USA	CASC
CASENT0159715	BLF23274	Pheidole	megacephala	Pheidole.megacephala	1w., 1s.	pin	B.L.Fisher et al.	2010-01-23		Seychelles	35 m	-4.48484	55.2507	Malagasy	CASC, San Francisco, CA, USA	CASC
CASENT0159722	BLF23275	Pheidole	megacephala	Pheidole.megacephala	1w., 1s.	pin	B.L.Fisher et al.	2010-01-23		Seychelles	35 m	-4.48484	55.2507	Malagasy	CASC, San Francisco, CA, USA	CASC
CASENT0159724	BLF23289	Pheidole	megacephala	Pheidole.megacephala	1w., 1s.	pin	B.L.Fisher et al.	2010-01-23		Seychelles	35 m	-4.48484	55.2507	Malagasy	CASC, San Francisco, CA, USA	CASC
CASENT0159728	BLF23271	Pheidole	megacephala	Pheidole.megacephala	1w., 1s.	pin	B.L.Fisher et al.	2010-01-23		Seychelles	35 m	-4.48484	55.2507	Malagasy	CASC, San Francisco, CA, USA	CASC
CASENT0159734	BLF23286	Pheidole	megacephala	Pheidole.megacephala	1w., 1s.	pin	B.L.Fisher et al.	2010-01-23		Seychelles	35 m	-4.48484	55.2507	Malagasy	CASC, San Francisco, CA, USA	CASC
CASENT0159735	BLF23276	Pheidole	megacephala	Pheidole.megacephala	1w., 1s.	pin	B.L.Fisher et al.	2010-01-23		Seychelles	35 m	-4.48484	55.2507	Malagasy	CASC, San Francisco, CA, USA	CASC
CASENT0159736	BLF23287	Pheidole	megacephala	Pheidole.megacephala	1w., 1s.	pin	B.L.Fisher et al.	2010-01-23		Seychelles	35 m	-4.48484	55.2507	Malagasy	CASC, San Francisco, CA, USA	CASC
CASENT0159737	BLF23284	Pheidole	megacephala	Pheidole.megacephala	1w., 1s.	pin	B.L.Fisher et al.	2010-01-23		Seychelles	35 m	-4.48484	55.2507	Malagasy	CASC, San Francisco, CA, USA	CASC
CASENT0159740	BLF23272	Pheidole	megacephala	Pheidole.megacephala	1w., 1s.	pin	B.L.Fisher et al.	2010-01-23		Seychelles	35 m	-4.48484	55.2507	Malagasy	CASC, San Francisco, CA, USA	CASC
CASENT0159744	BLF23273	Pheidole	megacephala	Pheidole.megacephala	1w., 1s.	pin	B.L.Fisher et al.	2010-01-23		Seychelles	35 m	-4.48484	55.2507	Malagasy	CASC, San Francisco, CA, USA	CASC
CASENT0159766	BLF23314	Pheidole	megacephala	Pheidole.megacephala	1w., 1s.	pin	B.L.Fisher et al.	2010-01-23		Seychelles	10 m	-4.46951	55.2416	Malagasy	CASC, San Francisco, CA, USA	CASC
CASENT0160206	BLF23942	Pheidole	megacephala	Pheidole.megacephala	1w.	pin	B.L.Fisher et al.	2010-02-05		Seychelles	10 m	-4.21407	55.6682	Malagasy	CASC, San Francisco, CA, USA	CASC
CASENT0160221	BLF23942	Pheidole	megacephala	Pheidole.megacephala	1s.	pin	B.L.Fisher et al.	2010-02-05		Seychelles	10 m	-4.21407	55.6682	Malagasy	CASC, San Francisco, CA, USA	CASC
CASENT0160728	BLF23723	Pheidole	megacephala	Pheidole.megacephala	1w., 1s.	pin	B.L.Fisher et al.	2010-02-01		Seychelles	20 m	-4.32012	55.8668	Malagasy	CASC, San Francisco, CA, USA	CASC
CASENT0160732	BLF23725	Pheidole	megacephala	Pheidole.megacephala	1w.	pin	B.L.Fisher et al.	2010-02-01		Seychelles	20 m	-4.32012	55.8668	Malagasy	CASC, San Francisco, CA, USA	CASC
CASENT0160733	BLF23716	Pheidole	megacephala	Pheidole.megacephala	1w., 1s.	pin	B.L.Fisher et al.	2010-02-01		Seychelles	20 m	-4.32012	55.8668	Malagasy	CASC, San Francisco, CA, USA	CASC
CASENT0160735	BLF23721	Pheidole	megacephala	Pheidole.megacephala	1w., 1s.	pin	B.L.Fisher et al.	2010-02-01		Seychelles	20 m	-4.32012	55.8668	Malagasy	CASC, San Francisco, CA, USA	CASC
CASENT0160784	BLF23134	Pheidole	megacephala	Pheidole.megacephala	1w.	pin	B.L.Fisher et al.	2010-01-20		Seychelles	520 m	-4.4867	55.2341	Malagasy	CASC, San Francisco, CA, USA	CASC
CASENT0136863	BLF19887	Pheidole	megatron	Pheidole.megatron	1w.	pin	B.L.Fisher et al.	2008-03-16	Grande Comore	Comoros	10 m	-11.3809	43.3133	Malagasy	CASC, San Francisco, CA, USA	CASC
CASENT0136865	BLF19888	Pheidole	megatron	Pheidole.megatron	1w., 1s.	pin	B.L.Fisher et al.	2008-03-16	Grande Comore	Comoros	10 m	-11.3809	43.3133	Malagasy	CASC, San Francisco, CA, USA	CASC
CASENT0136864	BLF19889	Pheidole	megatron	Pheidole.megatron	1w., 1s.	pin	B.L.Fisher et al.	2008-03-16	Grande Comore	Comoros	10 m	-11.3809	43.3133	Malagasy	CASC, San Francisco, CA, USA	CASC
CASENT0137379	BLF19984	Pheidole	megatron	Pheidole.megatron	1w., 1s.	pin	B.L.Fisher et al.	2008-03-18	Grande Comore	Comoros	35 m	-11.7545	43.4515	Malagasy	CASC, San Francisco, CA, USA	CASC
CASENT0137359	BLF19992	Pheidole	megatron	Pheidole.megatron	1w., 1s.	pin	B.L.Fisher et al.	2008-03-18	Grande Comore	Comoros	35 m	-11.7545	43.4515	Malagasy	CASC, San Francisco, CA, USA	CASC
CASENT0137386	BLF20001	Pheidole	megatron	Pheidole.megatron	1w., 1s.	pin	B.L.Fisher et al.	2008-03-18	Grande Comore	Comoros	35 m	-11.7545	43.4515	Malagasy	CASC, San Francisco, CA, USA	CASC
CASENT0137370	BLF20007	Pheidole	megatron	Pheidole.megatron	1w., 1s.	pin	B.L.Fisher et al.	2008-03-18	Grande Comore	Comoros	35 m	-11.7545	43.4515	Malagasy	CASC, San Francisco, CA, USA	CASC
CASENT0147183	BLF20758	Pheidole	megatron	Pheidole.megatron	1w., 1q.	pin	B.L.Fisher et al.	2009-01-20	Mohéli	Comoros	25 m	-12.3791	43.8516	Malagasy	CASC, San Francisco, CA, USA	CASC
CASENT0281179	BLF20758	Pheidole	megatron	Pheidole.megatron	1w.	pin	B.L.Fisher et al.	2009-01-20	Mohéli	Comoros	25 m	-12.3791	43.8516	Malagasy	CASC, San Francisco, CA, USA	CASC
CASENT0147241	BLF20762	Pheidole	megatron	Pheidole.megatron	2w.	pin	B.L.Fisher et al.	2009-01-20	Mohéli	Comoros	25 m	-12.3791	43.8516	Malagasy	CASC, San Francisco, CA, USA	CASC
CASENT0147193	BLF20771	Pheidole	megatron	Pheidole.megatron	1w., 1q.	pin	B.L.Fisher et al.	2009-01-20	Mohéli	Comoros	25 m	-12.3791	43.8516	Malagasy	CASC, San Francisco, CA, USA	CASC
CASENT0147194	BLF20771	Pheidole	megatron	Pheidole.megatron	1s.	pin	B.L.Fisher et al.	2009-01-20	Mohéli	Comoros	25 m	-12.3791	43.8516	Malagasy	CASC, San Francisco, CA, USA	CASC
CASENT0147161	BLF20776	Pheidole	megatron	Pheidole.megatron	1w., 1q.	pin	B.L.Fisher et al.	2009-01-20	Mohéli	Comoros	25 m	-12.3791	43.8516	Malagasy	CASC, San Francisco, CA, USA	CASC
CASENT0147140	BLF20797	Pheidole	megatron	Pheidole.megatron	2w.	pin	B.L.Fisher et al.	2009-01-20	Mohéli	Comoros	25 m	-12.3791	43.8516	Malagasy	CASC, San Francisco, CA, USA	CASC
CASENT0147141	BLF20797	Pheidole	megatron	Pheidole.megatron	1w., 1q.	pin	B.L.Fisher et al.	2009-01-20	Mohéli	Comoros	25 m	-12.3791	43.8516	Malagasy	CASC, San Francisco, CA, USA	CASC
CASENT0146035	BLF21251	Pheidole	megatron	Pheidole.megatron	2w.	pin	B.L.Fisher et al.	2009-01-28	Anjouan	Comoros	20 m	-12.3805	44.5022	Malagasy	CASC, San Francisco, CA, USA	CASC
CASENT0146034	BLF21261	Pheidole	megatron	Pheidole.megatron	1s.	pin	B.L.Fisher et al.	2009-01-28	Anjouan	Comoros	20 m	-12.3805	44.5022	Malagasy	CASC, San Francisco, CA, USA	CASC
CASENT0041340	BLF09426	Pheidole	megatron	Pheidole.MGs125	1s.	pin	B.L.Fisher	2003-11-27	Antsiranana	Madagascar	30 m	-13.0833	49.9083	Malagasy	CASC, San Francisco, CA, USA	CASC
CASENT0041452	BLF09426	Pheidole	megatron	Pheidole.MGs125	1s.	pin	B.L.Fisher	2003-11-27	Antsiranana	Madagascar	30 m	-13.0833	49.9083	Malagasy	CASC, San Francisco, CA, USA	CASC
CASENT0107681	BLF11572	Pheidole	megatron	Pheidole.MG146	1w., 1s.	pin	B.L.Fisher	2004-12-09	Antsiranana	Madagascar	150 m	-13.4645	48.5517	Malagasy	CASC, San Francisco, CA, USA	CASC
CASENT0122982	BLF16556	Pheidole	megatron	Pheidole.MG145	1w., 1s.	pin	B.L.Fisher et al.	2007-02-08	Majunga	Madagascar	5 m	-15.7178	46.317	Malagasy	CASC, San Francisco, CA, USA	CASC
CASENT0122963	BLF16562	Pheidole	megatron	Pheidole.MG146	1w.	pin	B.L.Fisher et al.	2007-02-08	Majunga	Madagascar	5 m	-15.7178	46.317	Malagasy	CASC, San Francisco, CA, USA	CASC
CASENT0122961	BLF16562	Pheidole	megatron	Pheidole.MGs124	1s.	pin	B.L.Fisher et al.	2007-02-08	Majunga	Madagascar	5 m	-15.7178	46.317	Malagasy	CASC, San Francisco, CA, USA	CASC
CASENT0122962	BLF16562	Pheidole	megatron	Pheidole.MGs128	1s.	pin	B.L.Fisher et al.	2007-02-08	Majunga	Madagascar	5 m	-15.7178	46.317	Malagasy	CASC, San Francisco, CA, USA	CASC
CASENT0122964	BLF16563	Pheidole	megatron	Pheidole.MG146	1w.	pin	B.L.Fisher et al.	2007-02-08	Majunga	Madagascar	5 m	-15.7178	46.317	Malagasy	CASC, San Francisco, CA, USA	CASC
CASENT0122965	BLF16563	Pheidole	megatron	Pheidole.MG146	1w.	pin	B.L.Fisher et al.	2007-02-08	Majunga	Madagascar	5 m	-15.7178	46.317	Malagasy	CASC, San Francisco, CA, USA	CASC
CASENT0125528	BLF17018	Pheidole	megatron	Pheidole.MG145	1w., 1q.	pin	B.L.Fisher et al.	2007-03-23	Antsiranana	Madagascar	30 m	-13.6827	48.4524	Malagasy	CASC, San Francisco, CA, USA	CASC
CASENT0125512	BLF17023	Pheidole	megatron	Pheidole.MG145	1w.	pin	B.L.Fisher et al.	2007-03-23	Antsiranana	Madagascar	30 m	-13.6827	48.4524	Malagasy	CASC, San Francisco, CA, USA	CASC
CASENT0125513	BLF17033	Pheidole	megatron	Pheidole.MG145	1w., 1s.	pin	B.L.Fisher et al.	2007-03-23	Antsiranana	Madagascar	30 m	-13.6827	48.4524	Malagasy	CASC, San Francisco, CA, USA	CASC
CASENT0125538	BLF17034	Pheidole	megatron	Pheidole.megacephala	1w., 1s.	pin	B.L.Fisher et al.	2007-03-23	Antsiranana	Madagascar	30 m	-13.6827	48.4524	Malagasy	CASC, San Francisco, CA, USA	CASC
CASENT0125537	BLF17034	Pheidole	megatron	Pheidole.MG145	1w., 1q.	pin	B.L.Fisher et al.	2007-03-23	Antsiranana	Madagascar	30 m	-13.6827	48.4524	Malagasy	CASC, San Francisco, CA, USA	CASC
CASENT0124896	BLF17039	Pheidole	megatron	Pheidole.MG145	1w.	pin	B.L.Fisher et al.	2007-03-23	Antsiranana	Madagascar	30 m	-13.6827	48.4524	Malagasy	CASC, San Francisco, CA, USA	CASC
CASENT0124890	BLF17042	Pheidole	megatron	Pheidole.MG145	1w., 1s.	pin	B.L.Fisher et al.	2007-03-23	Antsiranana	Madagascar	30 m	-13.6827	48.4524	Malagasy	CASC, San Francisco, CA, USA	CASC
CASENT0124910	BLF17045	Pheidole	megatron	Pheidole.megacephala	1w.	pin	B.L.Fisher et al.	2007-03-23	Antsiranana	Madagascar	30 m	-13.6827	48.4524	Malagasy	CASC, San Francisco, CA, USA	CASC
CASENT0124885	BLF17058	Pheidole	megatron	Pheidole.MG145	1w., 1s.	pin	B.L.Fisher et al.	2007-03-23	Antsiranana	Madagascar	30 m	-13.6827	48.4524	Malagasy	CASC, San Francisco, CA, USA	CASC
CASENT0125017	BLF17068	Pheidole	megatron	Pheidole.MG145	1w.	pin	B.L.Fisher et al.	2007-03-25	Antsiranana	Madagascar	23 m	-14.2614	50.163	Malagasy	CASC, San Francisco, CA, USA	CASC
CASENT0124355	BLF17075	Pheidole	megatron	Pheidole.megacephala	1w., 1s.	pin	B.L.Fisher et al.	2007-03-25	Antsiranana	Madagascar	23 m	-14.2614	50.163	Malagasy	CASC, San Francisco, CA, USA	CASC
CASENT0124366	BLF17077	Pheidole	megatron	Pheidole.megacephala	1w., 1q.	pin	B.L.Fisher et al.	2007-03-25	Antsiranana	Madagascar	23 m	-14.2614	50.163	Malagasy	CASC, San Francisco, CA, USA	CASC
CASENT0125003	BLF17083	Pheidole	megatron	Pheidole.MG145	1w., 1q.	pin	B.L.Fisher et al.	2007-03-25	Antsiranana	Madagascar	23 m	-14.2614	50.163	Malagasy	CASC, San Francisco, CA, USA	CASC
CASENT0125029	BLF17101	Pheidole	megatron	Pheidole.megacephala	1w., 1s.	pin	B.L.Fisher et al.	2007-03-25	Antsiranana	Madagascar	23 m	-14.2614	50.163	Malagasy	CASC, San Francisco, CA, USA	CASC
CASENT0125028	BLF17101	Pheidole	megatron	Pheidole.MG145	1w., 1q.	pin	B.L.Fisher et al.	2007-03-25	Antsiranana	Madagascar	23 m	-14.2614	50.163	Malagasy	CASC, San Francisco, CA, USA	CASC
CASENT0123398	BLF17115	Pheidole	megatron	Pheidole.MG146	1w., 1s.	pin	B.L.Fisher et al.	2007-03-26	Antsiranana	Madagascar	23 m	-14.9013	50.2809	Malagasy	CASC, San Francisco, CA, USA	CASC
CASENT0123402	BLF17120	Pheidole	megatron	Pheidole.megacephala	1w., 1s.	pin	B.L.Fisher et al.	2007-03-26	Antsiranana	Madagascar	23 m	-14.9013	50.2809	Malagasy	CASC, San Francisco, CA, USA	CASC
CASENT0125969	BLF17126	Pheidole	megatron	Pheidole.megacephala	1w.	pin	B.L.Fisher et al.	2007-03-26	Antsiranana	Madagascar	23 m	-14.9013	50.2809	Malagasy	CASC, San Francisco, CA, USA	CASC
CASENT0123400	BLF17137	Pheidole	megatron	Pheidole.MG145	1w., 1s.	pin	B.L.Fisher et al.	2007-03-26	Antsiranana	Madagascar	23 m	-14.9013	50.2809	Malagasy	CASC, San Francisco, CA, USA	CASC
CASENT0125295	BLF17142	Pheidole	megatron	Pheidole.MG146	1w.	pin	B.L.Fisher et al.	2007-03-27	Antsiranana	Madagascar	16 m	-13.3597	50.0039	Malagasy	CASC, San Francisco, CA, USA	CASC
CASENT0125294	BLF17142	Pheidole	megatron	Pheidole.MGs120	1s.	pin	B.L.Fisher et al.	2007-03-27	Antsiranana	Madagascar	16 m	-13.3597	50.0039	Malagasy	CASC, San Francisco, CA, USA	CASC
CASENT0125292	BLF17149	Pheidole	megatron	Pheidole.MG146	1w.	pin	B.L.Fisher et al.	2007-03-27	Antsiranana	Madagascar	16 m	-13.3597	50.0039	Malagasy	CASC, San Francisco, CA, USA	CASC
CASENT0125288	BLF17158	Pheidole	megatron	Pheidole.MG146	1w.	pin	B.L.Fisher et al.	2007-03-27	Antsiranana	Madagascar	16 m	-13.3597	50.0039	Malagasy	CASC, San Francisco, CA, USA	CASC
CASENT0125287	BLF17158	Pheidole	megatron	Pheidole.MGs120	1s.	pin	B.L.Fisher et al.	2007-03-27	Antsiranana	Madagascar	16 m	-13.3597	50.0039	Malagasy	CASC, San Francisco, CA, USA	CASC
CASENT0125036	BLF17161	Pheidole	megatron	Pheidole.MG145	1w., 1s.	pin	B.L.Fisher et al.	2007-03-27	Antsiranana	Madagascar	16 m	-13.3597	50.0039	Malagasy	CASC, San Francisco, CA, USA	CASC
CASENT0125044	BLF17163	Pheidole	megatron	Pheidole.MG145	1w., 1s.	pin	B.L.Fisher et al.	2007-03-27	Antsiranana	Madagascar	16 m	-13.3597	50.0039	Malagasy	CASC, San Francisco, CA, USA	CASC
CASENT0125043	BLF17171	Pheidole	megatron	Pheidole.MG145	1w., 1s.	pin	B.L.Fisher et al.	2007-03-27	Antsiranana	Madagascar	16 m	-13.3597	50.0039	Malagasy	CASC, San Francisco, CA, USA	CASC
CASENT0125046	BLF17174	Pheidole	megatron	Pheidole.MG146	1w.	pin	B.L.Fisher et al.	2007-03-27	Antsiranana	Madagascar	16 m	-13.3597	50.0039	Malagasy	CASC, San Francisco, CA, USA	CASC
CASENT0125283	BLF17175	Pheidole	megatron	Pheidole.MG146	1w.	pin	B.L.Fisher et al.	2007-03-27	Antsiranana	Madagascar	16 m	-13.3597	50.0039	Malagasy	CASC, San Francisco, CA, USA	CASC
CASENT0123442	BLF17188	Pheidole	megatron	Pheidole.megacephala	1w., 1s.	pin	B.L.Fisher et al.	2007-03-27	Antsiranana	Madagascar	25 m	-13.3772	50.0205	Malagasy	CASC, San Francisco, CA, USA	CASC
CASENT0125610	BLF17194	Pheidole	megatron	Pheidole.MG145	1w., 1s.	pin	B.L.Fisher et al.	2007-03-28	Antsiranana	Madagascar	43 m	-12.2778	49.2916	Malagasy	CASC, San Francisco, CA, USA	CASC
CASENT0125936	BLF17211	Pheidole	megatron	Pheidole.MG145	1w., 1s.	pin	B.L.Fisher et al.	2007-03-28	Antsiranana	Madagascar	43 m	-12.2778	49.2916	Malagasy	CASC, San Francisco, CA, USA	CASC
CASENT0125492	BLF17237	Pheidole	megatron	Pheidole.MG145	1w., 1s.	pin	B.L.Fisher et al.	2007-03-29	Antsiranana	Madagascar	74 m	-12.3728	49.2289	Malagasy	CASC, San Francisco, CA, USA	CASC
CASENT0125480	BLF17247	Pheidole	megatron	Pheidole.MG145	1w., 1s.	pin	B.L.Fisher et al.	2007-03-29	Antsiranana	Madagascar	74 m	-12.3728	49.2289	Malagasy	CASC, San Francisco, CA, USA	CASC
CASENT0125494	BLF17252	Pheidole	megatron	Pheidole.MG145	1w., 1s.	pin	B.L.Fisher et al.	2007-03-29	Antsiranana	Madagascar	74 m	-12.3728	49.2289	Malagasy	CASC, San Francisco, CA, USA	CASC
CASENT0125505	BLF17254	Pheidole	megatron	Pheidole.MG145	1w., 1s.	pin	B.L.Fisher et al.	2007-03-29	Antsiranana	Madagascar	74 m	-12.3728	49.2289	Malagasy	CASC, San Francisco, CA, USA	CASC
CASENT0125482	BLF17255	Pheidole	megatron	Pheidole.MG145	1w., 1s.	pin	B.L.Fisher et al.	2007-03-29	Antsiranana	Madagascar	74 m	-12.3728	49.2289	Malagasy	CASC, San Francisco, CA, USA	CASC
CASENT0125487	BLF17258	Pheidole	megatron	Pheidole.megacephala	1w., 1s.	pin	B.L.Fisher et al.	2007-03-29	Antsiranana	Madagascar	74 m	-12.3728	49.2289	Malagasy	CASC, San Francisco, CA, USA	CASC
CASENT0125502	BLF17259	Pheidole	megatron	Pheidole.MG146	1w.	pin	B.L.Fisher et al.	2007-03-29	Antsiranana	Madagascar	74 m	-12.3728	49.2289	Malagasy	CASC, San Francisco, CA, USA	CASC
CASENT0125484	BLF17260	Pheidole	megatron	Pheidole.megacephala	1w., 1s.	pin	B.L.Fisher et al.	2007-03-29	Antsiranana	Madagascar	74 m	-12.3728	49.2289	Malagasy	CASC, San Francisco, CA, USA	CASC
CASENT0125564	BLF17294	Pheidole	megatron	Pheidole.MG148	1w.	pin	B.L.Fisher et al.	2007-03-30	Antsiranana	Madagascar	61 m	-13.1973	49.0487	Malagasy	CASC, San Francisco, CA, USA	CASC
CASENT0125613	BLF17299	Pheidole	megatron	Pheidole.MG147	1w.	pin	B.L.Fisher et al.	2007-03-30	Antsiranana	Madagascar	61 m	-13.1973	49.0487	Malagasy	CASC, San Francisco, CA, USA	CASC
CASENT0136919	BLF20097	Pheidole	megatron	Pheidole.megacephala	1w., 1s.	pin	B.L.Fisher et al.	2008-04-10	Mahajanga	Madagascar	18 m	-14.3204	48.0306	Malagasy	CASC, San Francisco, CA, USA	CASC
CASENT0136670	BLF20105	Pheidole	megatron	Pheidole.MG145	1w.	pin	B.L.Fisher et al.	2008-04-10	Mahajanga	Madagascar	18 m	-14.3204	48.0306	Malagasy	CASC, San Francisco, CA, USA	CASC
CASENT0138072	BLF20113	Pheidole	megatron	Pheidole.megacephala	2w.	pin	B.L.Fisher et al.	2008-04-10	Mahajanga	Madagascar	18 m	-14.3204	48.0306	Malagasy	CASC, San Francisco, CA, USA	CASC
CASENT0138280	BLF20127	Pheidole	megatron	Pheidole.megacephala	2w.	pin	B.L.Fisher et al.	2008-04-11	Mahajanga	Madagascar	247 m	-14.1074	48.1105	Malagasy	CASC, San Francisco, CA, USA	CASC
CASENT0138275	BLF20133	Pheidole	megatron	Pheidole.megacephala	1w., 1s.	pin	B.L.Fisher et al.	2008-04-11	Mahajanga	Madagascar	247 m	-14.1074	48.1105	Malagasy	CASC, San Francisco, CA, USA	CASC
CASENT0138297	BLF20143	Pheidole	megatron	Pheidole.megacephala	1w., 1s.	pin	B.L.Fisher et al.	2008-04-11	Mahajanga	Madagascar	247 m	-14.1074	48.1105	Malagasy	CASC, San Francisco, CA, USA	CASC
CASENT0138270	BLF20146	Pheidole	megatron	Pheidole.megacephala	1w., 1s.	pin	B.L.Fisher et al.	2008-04-11	Mahajanga	Madagascar	247 m	-14.1074	48.1105	Malagasy	CASC, San Francisco, CA, USA	CASC
CASENT0138277	BLF20154	Pheidole	megatron	Pheidole.MG145	1w.	pin	B.L.Fisher et al.	2008-04-11	Mahajanga	Madagascar	247 m	-14.1074	48.1105	Malagasy	CASC, San Francisco, CA, USA	CASC
CASENT0179573	BLF20154	Pheidole	megatron	Pheidole.MG145	1w., 1s.	pin	B.L.Fisher et al.	2008-04-11	Mahajanga	Madagascar	247 m	-14.1074	48.1105	Malagasy	CASC, San Francisco, CA, USA	CASC
CASENT0138283	BLF20156	Pheidole	megatron	Pheidole.MGs128	1s.	pin	B.L.Fisher et al.	2008-04-11	Mahajanga	Madagascar	247 m	-14.1074	48.1105	Malagasy	CASC, San Francisco, CA, USA	CASC
CASENT0137951	BLF20169	Pheidole	megatron	Pheidole.MG145	1w., 1s.	pin	B.L.Fisher et al.	2008-04-11	Mahajanga	Madagascar	145 m	-13.9755	48.1593	Malagasy	CASC, San Francisco, CA, USA	CASC
CASENT0137631	BLF20218	Pheidole	megatron	Pheidole.megacephala	1w., 1s.	pin	B.L.Fisher et al.	2008-04-12	Antsiranana	Madagascar	16 m	-13.5092	48.5672	Malagasy	CASC, San Francisco, CA, USA	CASC
CASENT0137625	BLF20221	Pheidole	megatron	Pheidole.megacephala	1w., 1q.	pin	B.L.Fisher et al.	2008-04-12	Antsiranana	Madagascar	16 m	-13.5092	48.5672	Malagasy	CASC, San Francisco, CA, USA	CASC
CASENT0137616	BLF20230	Pheidole	megatron	Pheidole.megacephala	1w., 1s.	pin	B.L.Fisher et al.	2008-04-12	Antsiranana	Madagascar	16 m	-13.5092	48.5672	Malagasy	CASC, San Francisco, CA, USA	CASC
CASENT0137629	BLF20236	Pheidole	megatron	Pheidole.MG145	1w., 1s.	pin	B.L.Fisher et al.	2008-04-12	Antsiranana	Madagascar	16 m	-13.5092	48.5672	Malagasy	CASC, San Francisco, CA, USA	CASC
CASENT0137634	BLF20241	Pheidole	megatron	Pheidole.MG145	1w.	pin	B.L.Fisher et al.	2008-04-12	Antsiranana	Madagascar	16 m	-13.5092	48.5672	Malagasy	CASC, San Francisco, CA, USA	CASC
CASENT0137628	BLF20242	Pheidole	megatron	Pheidole.MG145	1w.	pin	B.L.Fisher et al.	2008-04-12	Antsiranana	Madagascar	16 m	-13.5092	48.5672	Malagasy	CASC, San Francisco, CA, USA	CASC
CASENT0137960	BLF20262	Pheidole	megatron	Pheidole.MG145	1w., 1s.	pin	B.L.Fisher et al.	2008-04-12	Antsiranana	Madagascar	7 m	-13.3654	48.4877	Malagasy	CASC, San Francisco, CA, USA	CASC
CASENT0138032	BLF20271	Pheidole	megatron	Pheidole.MG145	1w., 1s.	pin	B.L.Fisher et al.	2008-04-12	Antsiranana	Madagascar	7 m	-13.3654	48.4877	Malagasy	CASC, San Francisco, CA, USA	CASC
CASENT0137965	BLF20273	Pheidole	megatron	Pheidole.MG145	1w.	pin	B.L.Fisher et al.	2008-04-12	Antsiranana	Madagascar	7 m	-13.3654	48.4877	Malagasy	CASC, San Francisco, CA, USA	CASC
CASENT0138055	BLF20274	Pheidole	megatron	Pheidole.MG145	1w.	pin	B.L.Fisher et al.	2008-04-12	Antsiranana	Madagascar	7 m	-13.3654	48.4877	Malagasy	CASC, San Francisco, CA, USA	CASC
CASENT0137974	BLF20275	Pheidole	megatron	Pheidole.MG145	2w.	pin	B.L.Fisher et al.	2008-04-12	Antsiranana	Madagascar	7 m	-13.3654	48.4877	Malagasy	CASC, San Francisco, CA, USA	CASC
CASENT0138050	BLF20290	Pheidole	megatron	Pheidole.MG145	1w.	pin	B.L.Fisher et al.	2008-04-12	Antsiranana	Madagascar	7 m	-13.3654	48.4877	Malagasy	CASC, San Francisco, CA, USA	CASC
CASENT0137947	BLF20294	Pheidole	megatron	Pheidole.MG145	1w., 1s.	pin	B.L.Fisher et al.	2008-04-12	Antsiranana	Madagascar	7 m	-13.3654	48.4877	Malagasy	CASC, San Francisco, CA, USA	CASC
CASENT0138348	BLF20306	Pheidole	megatron	Pheidole.MG145	2w.	pin	B.L.Fisher et al.	2008-04-12	Antsiranana	Madagascar	41 m	-13.3917	48.4825	Malagasy	CASC, San Francisco, CA, USA	CASC
CASENT0138347	BLF20312	Pheidole	megatron	Pheidole.MG145	1w., 1s.	pin	B.L.Fisher et al.	2008-04-12	Antsiranana	Madagascar	41 m	-13.3917	48.4825	Malagasy	CASC, San Francisco, CA, USA	CASC
CASENT0138354	BLF20318	Pheidole	megatron	Pheidole.MG145	1w., 1s.	pin	B.L.Fisher et al.	2008-04-12	Antsiranana	Madagascar	41 m	-13.3917	48.4825	Malagasy	CASC, San Francisco, CA, USA	CASC
CASENT0138357	BLF20324	Pheidole	megatron	Pheidole.MG151	1w.	pin	B.L.Fisher et al.	2008-04-12	Antsiranana	Madagascar	41 m	-13.3917	48.4825	Malagasy	CASC, San Francisco, CA, USA	CASC
CASENT0138315	BLF20334	Pheidole	megatron	Pheidole.megacephala	1w., 1s.	pin	B.L.Fisher et al.	2008-04-13	Antsiranana	Madagascar	80 m	-12.3783	49.2268	Malagasy	CASC, San Francisco, CA, USA	CASC
CASENT0138309	BLF20338	Pheidole	megatron	Pheidole.megacephala	1w.	pin	B.L.Fisher et al.	2008-04-13	Antsiranana	Madagascar	80 m	-12.3783	49.2268	Malagasy	CASC, San Francisco, CA, USA	CASC
CASENT0138006	BLF20343	Pheidole	megatron	Pheidole.MG145	1w.	pin	B.L.Fisher et al.	2008-04-13	Antsiranana	Madagascar	28 m	-13.1496	48.9177	Malagasy	CASC, San Francisco, CA, USA	CASC
CASENT0137996	BLF20344	Pheidole	megatron	Pheidole.MG145	1w.	pin	B.L.Fisher et al.	2008-04-13	Antsiranana	Madagascar	28 m	-13.1496	48.9177	Malagasy	CASC, San Francisco, CA, USA	CASC
CASENT0138003	BLF20347	Pheidole	megatron	Pheidole.MG145	1w.	pin	B.L.Fisher et al.	2008-04-13	Antsiranana	Madagascar	28 m	-13.1496	48.9177	Malagasy	CASC, San Francisco, CA, USA	CASC
CASENT0138002	BLF20348	Pheidole	megatron	Pheidole.MG145	1w., 1s.	pin	B.L.Fisher et al.	2008-04-13	Antsiranana	Madagascar	28 m	-13.1496	48.9177	Malagasy	CASC, San Francisco, CA, USA	CASC
CASENT0138005	BLF20349	Pheidole	megatron	Pheidole.MG145	1w.	pin	B.L.Fisher et al.	2008-04-13	Antsiranana	Madagascar	28 m	-13.1496	48.9177	Malagasy	CASC, San Francisco, CA, USA	CASC
CASENT0371066	BLF32328	Pheidole	megatron	Pheidole.megacephala	1w.	pin	B.L.Fisher et al.	2013-10-22	Antsiranana	Madagascar	90 m	-12.9067	49.6606	Malagasy	CASC, San Francisco, CA, USA	CASC
CASENT0371070	BLF32339	Pheidole	megatron	Pheidole.megacephala	1w., 1s.	pin	B.L.Fisher et al.	2013-10-22	Antsiranana	Madagascar	90 m	-12.9067	49.6606	Malagasy	CASC, San Francisco, CA, USA	CASC
CASENT0370836	BLF32344	Pheidole	megatron	Pheidole.megacephala	1w.	pin	B.L.Fisher et al.	2013-10-23	Antsiranana	Madagascar	66 m	-12.9036	49.6592	Malagasy	CASC, San Francisco, CA, USA	CASC
CASENT0371068	BLF32350	Pheidole	megatron	Pheidole.megacephala	1w.	pin	B.L.Fisher et al.	2013-10-23	Antsiranana	Madagascar	66 m	-12.9036	49.6592	Malagasy	CASC, San Francisco, CA, USA	CASC
CASENT0370787	BLF32373	Pheidole	megatron	Pheidole.megacephala	1w., 1s.	pin	B.L.Fisher et al.	2013-10-23	Antsiranana	Madagascar	37 m	-12.8971	49.6592	Malagasy	CASC, San Francisco, CA, USA	CASC
CASENT0370773	BLF32390	Pheidole	megatron	Pheidole.megacephala	1w., 1s.	pin	B.L.Fisher et al.	2013-10-23	Antsiranana	Madagascar	13 m	-12.8949	49.6579	Malagasy	CASC, San Francisco, CA, USA	CASC
CASENT0121754	BLF16859	Pheidole	megatron	Pheidole.megacephala	1w., 1s.	pin	B.L.Fisher et al.	2007-02-18	Toamasina	Madagascar	15 m	-19.8993	48.8088	Malagasy	CASC, San Francisco, CA, USA	CASC
CASENT0146857	BLF21220	Pheidole	spinosa	Pheidole.punctulata	1s.	pin	B.L.Fisher et al.	2009-01-27	Anjouan	Comoros	20 m	-12.2576	44.3892	Malagasy	CASC, San Francisco, CA, USA	CASC
CASENT0146862	BLF21126	Pheidole	spinosa	Pheidole.decepticon	1w.	pin	B.L.Fisher et al.	2009-01-26	Anjouan	Comoros	65 m	-12.1877	44.3593	Malagasy	CASC, San Francisco, CA, USA	CASC
CASENT0228865	BLF26510	Pheidole	spinosa	Pheidole.decepticon	1w.	pin	B.L.Fisher	2011-04-13		Juan de Nova Island	10 m	-17.0518	42.7264	Malagasy	CASC, San Francisco, CA, USA	CASC
CASENT0228866	BLF26496	Pheidole	spinosa	Pheidole.decepticon	1w.	pin	B.L.Fisher	2011-04-13		Juan de Nova Island	10 m	-17.0518	42.7264	Malagasy	CASC, San Francisco, CA, USA	CASC
CASENT0228869	BLF26508	Pheidole	spinosa	Pheidole.decepticon	1w.	pin	B.L.Fisher	2011-04-13		Juan de Nova Island	10 m	-17.0518	42.7264	Malagasy	CASC, San Francisco, CA, USA	CASC
CASENT0228874	BLF26507	Pheidole	spinosa	Pheidole.decepticon	1w., 1s.	pin	B.L.Fisher	2011-04-13		Juan de Nova Island	10 m	-17.0518	42.7264	Malagasy	CASC, San Francisco, CA, USA	CASC
CASENT0228879	BLF26498	Pheidole	spinosa	Pheidole.decepticon	1w., 1s.	pin	B.L.Fisher	2011-04-13		Juan de Nova Island	10 m	-17.0518	42.7264	Malagasy	CASC, San Francisco, CA, USA	CASC
CASENT0228900	BLF26505	Pheidole	spinosa	Pheidole.decepticon	1w., 1s.	pin	B.L.Fisher	2011-04-13		Juan de Nova Island	10 m	-17.0518	42.7264	Malagasy	CASC, San Francisco, CA, USA	CASC
CASENT0228905	BLF26506	Pheidole	spinosa	Pheidole.decepticon	1w.	pin	B.L.Fisher	2011-04-13		Juan de Nova Island	10 m	-17.0518	42.7264	Malagasy	CASC, San Francisco, CA, USA	CASC
CASENT0228908	BLF26494	Pheidole	spinosa	Pheidole.decepticon	1w.	pin	B.L.Fisher	2011-04-13		Juan de Nova Island	10 m	-17.0518	42.7264	Malagasy	CASC, San Francisco, CA, USA	CASC
CASENT0228920	BLF26467	Pheidole	spinosa	Pheidole.decepticon	1w.	pin	B.L.Fisher	2011-04-11		Juan de Nova Island	12 m	-17.0527	42.7163	Malagasy	CASC, San Francisco, CA, USA	CASC
CASENT0228922	BLF26469	Pheidole	spinosa	Pheidole.decepticon	1w.	pin	B.L.Fisher	2011-04-11		Juan de Nova Island	12 m	-17.0527	42.7163	Malagasy	CASC, San Francisco, CA, USA	CASC
CASENT0230168	BLF26460	Pheidole	spinosa	Pheidole.decepticon	1w.	pin	B.L.Fisher	2011-04-11		Juan de Nova Island	10 m	-17.0487	42.7101	Malagasy	CASC, San Francisco, CA, USA	CASC
CASENT0230169	BLF26460	Pheidole	spinosa	Pheidole.decepticon	1w.	pin	B.L.Fisher	2011-04-11		Juan de Nova Island	10 m	-17.0487	42.7101	Malagasy	CASC, San Francisco, CA, USA	CASC
CASENT0232050	BLF26480	Pheidole	spinosa	Pheidole.decepticon	1w.	pin	B.L.Fisher	2011-04-12		Juan de Nova Island	12 m	-17.0605	42.7242	Malagasy	CASC, San Francisco, CA, USA	CASC
CASENT0232059	BLF26482	Pheidole	spinosa	Pheidole.decepticon	1w., 1s.	pin	B.L.Fisher	2011-04-12		Juan de Nova Island	12 m	-17.0605	42.7242	Malagasy	CASC, San Francisco, CA, USA	CASC
CASENT0232062	BLF26477	Pheidole	spinosa	Pheidole.decepticon	1w.	pin	B.L.Fisher	2011-04-12		Juan de Nova Island	5 m	-17.0618	42.7251	Malagasy	CASC, San Francisco, CA, USA	CASC
CASENT0232068	BLF26475	Pheidole	spinosa	Pheidole.decepticon	1w.	pin	B.L.Fisher	2011-04-12		Juan de Nova Island	5 m	-17.0618	42.7251	Malagasy	CASC, San Francisco, CA, USA	CASC
CASENT0232071	BLF26474	Pheidole	spinosa	Pheidole.decepticon	1w.	pin	B.L.Fisher	2011-04-12		Juan de Nova Island	5 m	-17.0618	42.7251	Malagasy	CASC, San Francisco, CA, USA	CASC
CASENT0232588	BLF26515	Pheidole	spinosa	Pheidole.decepticon	1w.	pin	B.L.Fisher	2011-04-13		Juan de Nova Island	10 m	-17.0518	42.7264	Malagasy	CASC, San Francisco, CA, USA	CASC
CASENT0003975	BLF05697	Pheidole	spinosa	Pheidole.MG151	1w.	pin	Fisher-Griswold Arthropod Team	2002-02-13	Toliara	Madagascar	160 m	-25.5944	45.1468	Malagasy	CASC, San Francisco, CA, USA	CASC
CASENT0004064	BLF06024	Pheidole	spinosa	Pheidole.MG154	1w.	pin	Fisher-Griswold Arthropod Team	2002-03-06	Toliara	Madagascar	70 m	-22.8022	43.4207	Malagasy	CASC, San Francisco, CA, USA	CASC
CASENT0004293	BLF02072	Pheidole	spinosa	Pheidole.MGs122	1s.	pin	B.L.Fisher	1998-11-22	Toliara	Madagascar	10 m	-25.0617	46.87	Malagasy	CASC, San Francisco, CA, USA	CASC
CASENT0007871	BLF03665	Pheidole	spinosa	Pheidole.MG147	2w.	pin	Fisher, Griswold et al.	2001-04-09	Mahajanga	Madagascar	210 m	-16.2672	47.0486	Malagasy	CASC, San Francisco, CA, USA	CASC
CASENT0008988	BLF03691	Pheidole	spinosa	Pheidole.MGs129	1s.	pin	Fisher, Griswold et al.	2001-04-17	Antananarivo	Madagascar	1410 m	-18.2253	47.2868	Malagasy	CASC, San Francisco, CA, USA	CASC
CASENT0008989	BLF03691	Pheidole	spinosa	Pheidole.MGs129	1s.	pin	Fisher, Griswold et al.	2001-04-17	Antananarivo	Madagascar	1410 m	-18.2253	47.2868	Malagasy	CASC, San Francisco, CA, USA	CASC
CASENT0008996	BLF03691	Pheidole	spinosa	Pheidole.MG146	1w.	pin	Fisher, Griswold et al.	2001-04-17	Antananarivo	Madagascar	1410 m	-18.2253	47.2868	Malagasy	CASC, San Francisco, CA, USA	CASC
CASENT0014826	BLF06068	Pheidole	spinosa	Pheidole.MG147	1w.	pin	Fisher-Griswold Arthropod Team	2002-03-12	Toliara	Madagascar	80 m	-22.2331	43.3663	Malagasy	CASC, San Francisco, CA, USA	CASC
CASENT0014832	BLF06068	Pheidole	spinosa	Pheidole.MG154	1w.	pin	Fisher-Griswold Arthropod Team	2002-03-12	Toliara	Madagascar	80 m	-22.2331	43.3663	Malagasy	CASC, San Francisco, CA, USA	CASC
CASENT0014860	BLF06068	Pheidole	spinosa	Pheidole.MGs122	1s.	pin	Fisher-Griswold Arthropod Team	2002-03-12	Toliara	Madagascar	80 m	-22.2331	43.3663	Malagasy	CASC, San Francisco, CA, USA	CASC
CASENT0014902	BLF06068	Pheidole	spinosa	Pheidole.MG147	1w.	pin	Fisher-Griswold Arthropod Team	2002-03-12	Toliara	Madagascar	80 m	-22.2331	43.3663	Malagasy	CASC, San Francisco, CA, USA	CASC
CASENT0015088	BLF06068	Pheidole	spinosa	Pheidole.MGs120	1s.	pin	Fisher-Griswold Arthropod Team	2002-03-12	Toliara	Madagascar	80 m	-22.2331	43.3663	Malagasy	CASC, San Francisco, CA, USA	CASC
CASENT0015613	BLF05758	Pheidole	spinosa	Pheidole.MG154	1w.	pin	Fisher-Griswold Arthropod Team	2002-02-21	Toliara	Madagascar	80 m	-24.6536	43.9967	Malagasy	CASC, San Francisco, CA, USA	CASC
CASENT0015617	BLF05758	Pheidole	spinosa	Pheidole.MGs122	1s.	pin	Fisher-Griswold Arthropod Team	2002-02-21	Toliara	Madagascar	80 m	-24.6536	43.9967	Malagasy	CASC, San Francisco, CA, USA	CASC
CASENT0015624	BLF05758	Pheidole	spinosa	Pheidole.MG147	1w.	pin	Fisher-Griswold Arthropod Team	2002-02-21	Toliara	Madagascar	80 m	-24.6536	43.9967	Malagasy	CASC, San Francisco, CA, USA	CASC
CASENT0015627	BLF05758	Pheidole	spinosa	Pheidole.MGs122	1s.	pin	Fisher-Griswold Arthropod Team	2002-02-21	Toliara	Madagascar	80 m	-24.6536	43.9967	Malagasy	CASC, San Francisco, CA, USA	CASC
CASENT0015640	BLF05758	Pheidole	spinosa	Pheidole.MG154	1w.	pin	Fisher-Griswold Arthropod Team	2002-02-21	Toliara	Madagascar	80 m	-24.6536	43.9967	Malagasy	CASC, San Francisco, CA, USA	CASC
CASENT0015825	BLF05758	Pheidole	spinosa	Pheidole.MG158	1w.	pin	Fisher-Griswold Arthropod Team	2002-02-21	Toliara	Madagascar	80 m	-24.6536	43.9967	Malagasy	CASC, San Francisco, CA, USA	CASC
CASENT0015833	BLF05758	Pheidole	spinosa	Pheidole.MG154	1w.	pin	Fisher-Griswold Arthropod Team	2002-02-21	Toliara	Madagascar	80 m	-24.6536	43.9967	Malagasy	CASC, San Francisco, CA, USA	CASC
CASENT0015963	BLF04726	Pheidole	spinosa	Pheidole.MGs128	1s.	pin	Fisher-Griswold Arthropod Team	2001-12-06	Toliara	Madagascar	80 m	-20.7953	44.147	Malagasy	CASC, San Francisco, CA, USA	CASC
CASENT0016038	BLF04726	Pheidole	spinosa	Pheidole.MGs122	1s.	pin	Fisher-Griswold Arthropod Team	2001-12-06	Toliara	Madagascar	80 m	-20.7953	44.147	Malagasy	CASC, San Francisco, CA, USA	CASC
CASENT0016039	BLF04726	Pheidole	spinosa	Pheidole.MG154	1w.	pin	Fisher-Griswold Arthropod Team	2001-12-06	Toliara	Madagascar	80 m	-20.7953	44.147	Malagasy	CASC, San Francisco, CA, USA	CASC
CASENT0016043	BLF04726	Pheidole	spinosa	Pheidole.MG155	1w.	pin	Fisher-Griswold Arthropod Team	2001-12-06	Toliara	Madagascar	80 m	-20.7953	44.147	Malagasy	CASC, San Francisco, CA, USA	CASC
CASENT0016046	BLF04726	Pheidole	spinosa	Pheidole.MGs122	1s.	pin	Fisher-Griswold Arthropod Team	2001-12-06	Toliara	Madagascar	80 m	-20.7953	44.147	Malagasy	CASC, San Francisco, CA, USA	CASC
CASENT0016050	BLF04726	Pheidole	spinosa	Pheidole.MG147	1w.	pin	Fisher-Griswold Arthropod Team	2001-12-06	Toliara	Madagascar	80 m	-20.7953	44.147	Malagasy	CASC, San Francisco, CA, USA	CASC
CASENT0016051	BLF04726	Pheidole	spinosa	Pheidole.megacephala spinosa	1w.	pin	Fisher-Griswold Arthropod Team	2001-12-06	Toliara	Madagascar	80 m	-20.7953	44.147	Malagasy	CASC, San Francisco, CA, USA	CASC
CASENT0016052	BLF04726	Pheidole	spinosa	Pheidole.MG150	1w.	pin	Fisher-Griswold Arthropod Team	2001-12-06	Toliara	Madagascar	80 m	-20.7953	44.147	Malagasy	CASC, San Francisco, CA, USA	CASC
CASENT0016887	BLF04916	Pheidole	spinosa	Pheidole.MGs128	1s.	pin	Fisher-Griswold Arthropod Team	2002-01-16	Toliara	Madagascar	300 m	-24.93	46.6455	Malagasy	CASC, San Francisco, CA, USA	CASC
CASENT0016889	BLF04916	Pheidole	spinosa	Pheidole.MG010	1w.	pin	Fisher-Griswold Arthropod Team	2002-01-16	Toliara	Madagascar	300 m	-24.93	46.6455	Malagasy	CASC, San Francisco, CA, USA	CASC
CASENT0016893	BLF04916	Pheidole	spinosa	Pheidole.MGs128	1s.	pin	Fisher-Griswold Arthropod Team	2002-01-16	Toliara	Madagascar	300 m	-24.93	46.6455	Malagasy	CASC, San Francisco, CA, USA	CASC
CASENT0016901	BLF04916	Pheidole	spinosa	Pheidole.MG146	1w.	pin	Fisher-Griswold Arthropod Team	2002-01-16	Toliara	Madagascar	300 m	-24.93	46.6455	Malagasy	CASC, San Francisco, CA, USA	CASC
CASENT0016910	BLF04916	Pheidole	spinosa	Pheidole.MGs122	1s.	pin	Fisher-Griswold Arthropod Team	2002-01-16	Toliara	Madagascar	300 m	-24.93	46.6455	Malagasy	CASC, San Francisco, CA, USA	CASC
CASENT0016981	BLF04916	Pheidole	spinosa	Pheidole.MG155	1w.	pin	Fisher-Griswold Arthropod Team	2002-01-16	Toliara	Madagascar	300 m	-24.93	46.6455	Malagasy	CASC, San Francisco, CA, USA	CASC
CASENT0016986	BLF04916	Pheidole	spinosa	Pheidole.MGs123	1s.	pin	Fisher-Griswold Arthropod Team	2002-01-16	Toliara	Madagascar	300 m	-24.93	46.6455	Malagasy	CASC, San Francisco, CA, USA	CASC
CASENT0017001	BLF04916	Pheidole	spinosa	Pheidole.MG153	1w.	pin	Fisher-Griswold Arthropod Team	2002-01-16	Toliara	Madagascar	300 m	-24.93	46.6455	Malagasy	CASC, San Francisco, CA, USA	CASC
CASENT0017004	BLF04916	Pheidole	spinosa	Pheidole.MGs122	1s.	pin	Fisher-Griswold Arthropod Team	2002-01-16	Toliara	Madagascar	300 m	-24.93	46.6455	Malagasy	CASC, San Francisco, CA, USA	CASC
CASENT0017016	BLF04916	Pheidole	spinosa	Pheidole.MGs128	1s.	pin	Fisher-Griswold Arthropod Team	2002-01-16	Toliara	Madagascar	300 m	-24.93	46.6455	Malagasy	CASC, San Francisco, CA, USA	CASC
CASENT0017156	BLF04916	Pheidole	spinosa	Pheidole.MG150	1w.	pin	Fisher-Griswold Arthropod Team	2002-01-16	Toliara	Madagascar	300 m	-24.93	46.6455	Malagasy	CASC, San Francisco, CA, USA	CASC
CASENT0017211	BLF05426	Pheidole	spinosa	Pheidole.MG154	1w.	pin	Fisher-Griswold Arthropod Team	2002-02-06	Toliara	Madagascar	40 m	-25.0078	46.306	Malagasy	CASC, San Francisco, CA, USA	CASC
CASENT0017215	BLF05426	Pheidole	spinosa	Pheidole.MG150	1w.	pin	Fisher-Griswold Arthropod Team	2002-02-06	Toliara	Madagascar	40 m	-25.0078	46.306	Malagasy	CASC, San Francisco, CA, USA	CASC
CASENT0017224	BLF05426	Pheidole	spinosa	Pheidole.MG147	1w.	pin	Fisher-Griswold Arthropod Team	2002-02-06	Toliara	Madagascar	40 m	-25.0078	46.306	Malagasy	CASC, San Francisco, CA, USA	CASC
CASENT0017232	BLF05426	Pheidole	spinosa	Pheidole.MG146	1w.	pin	Fisher-Griswold Arthropod Team	2002-02-06	Toliara	Madagascar	40 m	-25.0078	46.306	Malagasy	CASC, San Francisco, CA, USA	CASC
CASENT0017242	BLF05426	Pheidole	spinosa	Pheidole.MGs128	1s.	pin	Fisher-Griswold Arthropod Team	2002-02-06	Toliara	Madagascar	40 m	-25.0078	46.306	Malagasy	CASC, San Francisco, CA, USA	CASC
CASENT0017390	BLF05426	Pheidole	spinosa	Pheidole.MG146	1w.	pin	Fisher-Griswold Arthropod Team	2002-02-06	Toliara	Madagascar	40 m	-25.0078	46.306	Malagasy	CASC, San Francisco, CA, USA	CASC
CASENT0017392	BLF05426	Pheidole	spinosa	Pheidole.MG155	1w.	pin	Fisher-Griswold Arthropod Team	2002-02-06	Toliara	Madagascar	40 m	-25.0078	46.306	Malagasy	CASC, San Francisco, CA, USA	CASC
CASENT0017394	BLF05426	Pheidole	spinosa	Pheidole.MGs122	1s.	pin	Fisher-Griswold Arthropod Team	2002-02-06	Toliara	Madagascar	40 m	-25.0078	46.306	Malagasy	CASC, San Francisco, CA, USA	CASC
CASENT0017395	BLF05426	Pheidole	spinosa	Pheidole.MG148	1w.	pin	Fisher-Griswold Arthropod Team	2002-02-06	Toliara	Madagascar	40 m	-25.0078	46.306	Malagasy	CASC, San Francisco, CA, USA	CASC
CASENT0018003	BLF05238	Pheidole	spinosa	Pheidole.MG147	1w.	pin	Fisher-Griswold Arthropod Team	2002-01-28	Toliara	Madagascar	110 m	-24.7583	46.1572	Malagasy	CASC, San Francisco, CA, USA	CASC
CASENT0018008	BLF05850	Pheidole	spinosa	Pheidole.MGs122	1s.	pin	Fisher-Griswold Arthropod Team	2002-02-27	Toliara	Madagascar	75 m	-23.5242	44.1213	Malagasy	CASC, San Francisco, CA, USA	CASC
CASENT0018010	BLF05850	Pheidole	spinosa	Pheidole.MG154	1w.	pin	Fisher-Griswold Arthropod Team	2002-02-27	Toliara	Madagascar	75 m	-23.5242	44.1213	Malagasy	CASC, San Francisco, CA, USA	CASC
CASENT0018022	BLF05850	Pheidole	spinosa	Pheidole.MGs122	1s.	pin	Fisher-Griswold Arthropod Team	2002-02-27	Toliara	Madagascar	75 m	-23.5242	44.1213	Malagasy	CASC, San Francisco, CA, USA	CASC
CASENT0018267	BLF05850	Pheidole	spinosa	Pheidole.MG158	1w.	pin	Fisher-Griswold Arthropod Team	2002-02-27	Toliara	Madagascar	75 m	-23.5242	44.1213	Malagasy	CASC, San Francisco, CA, USA	CASC
CASENT0018269	BLF05850	Pheidole	spinosa	Pheidole.MG155	1w.	pin	Fisher-Griswold Arthropod Team	2002-02-27	Toliara	Madagascar	75 m	-23.5242	44.1213	Malagasy	CASC, San Francisco, CA, USA	CASC
CASENT0018278	BLF05850	Pheidole	spinosa	Pheidole.MG147	1w.	pin	Fisher-Griswold Arthropod Team	2002-02-27	Toliara	Madagascar	75 m	-23.5242	44.1213	Malagasy	CASC, San Francisco, CA, USA	CASC
CASENT0018285	BLF05850	Pheidole	spinosa	Pheidole.MGs120	1s.	pin	Fisher-Griswold Arthropod Team	2002-02-27	Toliara	Madagascar	75 m	-23.5242	44.1213	Malagasy	CASC, San Francisco, CA, USA	CASC
CASENT0018791	BLF05238	Pheidole	spinosa	Pheidole.MG154	1w.	pin	Fisher-Griswold Arthropod Team	2002-01-28	Toliara	Madagascar	110 m	-24.7583	46.1572	Malagasy	CASC, San Francisco, CA, USA	CASC
CASENT0018792	BLF05238	Pheidole	spinosa	Pheidole.MGs120	1s.	pin	Fisher-Griswold Arthropod Team	2002-01-28	Toliara	Madagascar	110 m	-24.7583	46.1572	Malagasy	CASC, San Francisco, CA, USA	CASC
CASENT0018806	BLF05238	Pheidole	spinosa	Pheidole.MGs122	1s.	pin	Fisher-Griswold Arthropod Team	2002-01-28	Toliara	Madagascar	110 m	-24.7583	46.1572	Malagasy	CASC, San Francisco, CA, USA	CASC
CASENT0018807	BLF05238	Pheidole	spinosa	Pheidole.MG155	1w.	pin	Fisher-Griswold Arthropod Team	2002-01-28	Toliara	Madagascar	110 m	-24.7583	46.1572	Malagasy	CASC, San Francisco, CA, USA	CASC
CASENT0018926	BLF06254	Pheidole	spinosa	Pheidole.MGs122	1s.	pin	Fisher-Griswold Arthropod Team	2002-03-22	Toliara	Madagascar	90 m	-23.9922	43.8807	Malagasy	CASC, San Francisco, CA, USA	CASC
CASENT0018928	BLF06254	Pheidole	spinosa	Pheidole.MG154	1w.	pin	Fisher-Griswold Arthropod Team	2002-03-22	Toliara	Madagascar	90 m	-23.9922	43.8807	Malagasy	CASC, San Francisco, CA, USA	CASC
CASENT0018955	BLF05316	Pheidole	spinosa	Pheidole.MGs122	1s.	pin	Fisher-Griswold Arthropod Team	2002-02-03	Toliara	Madagascar	35 m	-24.9569	46.2715	Malagasy	CASC, San Francisco, CA, USA	CASC
CASENT0018974	BLF05316	Pheidole	spinosa	Pheidole.MG154	1w.	pin	Fisher-Griswold Arthropod Team	2002-02-03	Toliara	Madagascar	35 m	-24.9569	46.2715	Malagasy	CASC, San Francisco, CA, USA	CASC
CASENT0019102	BLF05316	Pheidole	spinosa	Pheidole.MGs122	1s.	pin	Fisher-Griswold Arthropod Team	2002-02-03	Toliara	Madagascar	35 m	-24.9569	46.2715	Malagasy	CASC, San Francisco, CA, USA	CASC
CASENT0019109	BLF05319	Pheidole	spinosa	Pheidole.MGs122	1s.	pin	Fisher-Griswold Arthropod Team	2002-02-03	Toliara	Madagascar	35 m	-24.9569	46.2715	Malagasy	CASC, San Francisco, CA, USA	CASC
CASENT0019115	BLF05316	Pheidole	spinosa	Pheidole.MG155	1w.	pin	Fisher-Griswold Arthropod Team	2002-02-03	Toliara	Madagascar	35 m	-24.9569	46.2715	Malagasy	CASC, San Francisco, CA, USA	CASC
CASENT0019156	BLF05316	Pheidole	spinosa	Pheidole.MGs128	1s.	pin	Fisher-Griswold Arthropod Team	2002-02-03	Toliara	Madagascar	35 m	-24.9569	46.2715	Malagasy	CASC, San Francisco, CA, USA	CASC
CASENT0019167	BLF05316	Pheidole	spinosa	Pheidole.MG154	1w.	pin	Fisher-Griswold Arthropod Team	2002-02-03	Toliara	Madagascar	35 m	-24.9569	46.2715	Malagasy	CASC, San Francisco, CA, USA	CASC
CASENT0019177	BLF05316	Pheidole	spinosa	Pheidole.MGs129	1s.	pin	Fisher-Griswold Arthropod Team	2002-02-03	Toliara	Madagascar	35 m	-24.9569	46.2715	Malagasy	CASC, San Francisco, CA, USA	CASC
CASENT0019646	BLF05966	Pheidole	spinosa	Pheidole.MG154	1w.	pin	Fisher-Griswold Arthropod Team	2002-03-06	Toliara	Madagascar	70 m	-22.8022	43.4207	Malagasy	CASC, San Francisco, CA, USA	CASC
CASENT0019658	BLF05966	Pheidole	spinosa	Pheidole.MG155	1w.	pin	Fisher-Griswold Arthropod Team	2002-03-06	Toliara	Madagascar	70 m	-22.8022	43.4207	Malagasy	CASC, San Francisco, CA, USA	CASC
CASENT0019659	BLF05966	Pheidole	spinosa	Pheidole.MGs128	1s.	pin	Fisher-Griswold Arthropod Team	2002-03-06	Toliara	Madagascar	70 m	-22.8022	43.4207	Malagasy	CASC, San Francisco, CA, USA	CASC
CASENT0019669	BLF05966	Pheidole	spinosa	Pheidole.MGs128	1s.	pin	Fisher-Griswold Arthropod Team	2002-03-06	Toliara	Madagascar	70 m	-22.8022	43.4207	Malagasy	CASC, San Francisco, CA, USA	CASC
CASENT0019675	BLF05966	Pheidole	spinosa	Pheidole.MG147	1w.	pin	Fisher-Griswold Arthropod Team	2002-03-06	Toliara	Madagascar	70 m	-22.8022	43.4207	Malagasy	CASC, San Francisco, CA, USA	CASC
CASENT0019682	BLF05966	Pheidole	spinosa	Pheidole.MG158	1w.	pin	Fisher-Griswold Arthropod Team	2002-03-06	Toliara	Madagascar	70 m	-22.8022	43.4207	Malagasy	CASC, San Francisco, CA, USA	CASC
CASENT0019863	BLF05966	Pheidole	spinosa	Pheidole.MGs123	1s.	pin	Fisher-Griswold Arthropod Team	2002-03-06	Toliara	Madagascar	70 m	-22.8022	43.4207	Malagasy	CASC, San Francisco, CA, USA	CASC
CASENT0019864	BLF05966	Pheidole	spinosa	Pheidole.MG151	1w.	pin	Fisher-Griswold Arthropod Team	2002-03-06	Toliara	Madagascar	70 m	-22.8022	43.4207	Malagasy	CASC, San Francisco, CA, USA	CASC
CASENT0019865	BLF05966	Pheidole	spinosa	Pheidole.MGs122	1s.	pin	Fisher-Griswold Arthropod Team	2002-03-06	Toliara	Madagascar	70 m	-22.8022	43.4207	Malagasy	CASC, San Francisco, CA, USA	CASC
CASENT0019867	BLF05966	Pheidole	spinosa	Pheidole.MG148	1w.	pin	Fisher-Griswold Arthropod Team	2002-03-06	Toliara	Madagascar	70 m	-22.8022	43.4207	Malagasy	CASC, San Francisco, CA, USA	CASC
CASENT0019869	BLF05966	Pheidole	spinosa	Pheidole.MGs123	1s.	pin	Fisher-Griswold Arthropod Team	2002-03-06	Toliara	Madagascar	70 m	-22.8022	43.4207	Malagasy	CASC, San Francisco, CA, USA	CASC
CASENT0019872	BLF05966	Pheidole	spinosa	Pheidole.MGs122	1s.	pin	Fisher-Griswold Arthropod Team	2002-03-06	Toliara	Madagascar	70 m	-22.8022	43.4207	Malagasy	CASC, San Francisco, CA, USA	CASC
CASENT0019885	BLF05500	Pheidole	spinosa	Pheidole.MG154	1w.	pin	Fisher-Griswold Arthropod Team	2002-02-11	Toliara	Madagascar	200 m	-25.5817	45.1683	Malagasy	CASC, San Francisco, CA, USA	CASC
CASENT0019911	BLF05500	Pheidole	spinosa	Pheidole.MGs122	1s.	pin	Fisher-Griswold Arthropod Team	2002-02-11	Toliara	Madagascar	200 m	-25.5817	45.1683	Malagasy	CASC, San Francisco, CA, USA	CASC
CASENT0020563	BLF04810	Pheidole	spinosa	Pheidole.MG154	1w.	pin	Fisher-Griswold Arthropod Team	2002-01-12	Toliara	Madagascar	150 m	-24.8169	46.61	Malagasy	CASC, San Francisco, CA, USA	CASC
CASENT0020577	BLF04810	Pheidole	spinosa	Pheidole.MG147	1w.	pin	Fisher-Griswold Arthropod Team	2002-01-12	Toliara	Madagascar	150 m	-24.8169	46.61	Malagasy	CASC, San Francisco, CA, USA	CASC
CASENT0020578	BLF04810	Pheidole	spinosa	Pheidole.MG150	1w.	pin	Fisher-Griswold Arthropod Team	2002-01-12	Toliara	Madagascar	150 m	-24.8169	46.61	Malagasy	CASC, San Francisco, CA, USA	CASC
CASENT0020585	BLF04810	Pheidole	spinosa	Pheidole.MGs120	1s.	pin	Fisher-Griswold Arthropod Team	2002-01-12	Toliara	Madagascar	150 m	-24.8169	46.61	Malagasy	CASC, San Francisco, CA, USA	CASC
CASENT0020593	BLF04810	Pheidole	spinosa	Pheidole.MG146	1w.	pin	Fisher-Griswold Arthropod Team	2002-01-12	Toliara	Madagascar	150 m	-24.8169	46.61	Malagasy	CASC, San Francisco, CA, USA	CASC
CASENT0020599	BLF04810	Pheidole	spinosa	Pheidole.MGs122	1s.	pin	Fisher-Griswold Arthropod Team	2002-01-12	Toliara	Madagascar	150 m	-24.8169	46.61	Malagasy	CASC, San Francisco, CA, USA	CASC
CASENT0020810	BLF06160	Pheidole	spinosa	Pheidole.MGs122	1s.	pin	Fisher-Griswold Arthropod Team	2002-03-18	Toliara	Madagascar	25 m	-24.1006	43.76	Malagasy	CASC, San Francisco, CA, USA	CASC
CASENT0020821	BLF06160	Pheidole	spinosa	Pheidole.MG150	1w.	pin	Fisher-Griswold Arthropod Team	2002-03-18	Toliara	Madagascar	25 m	-24.1006	43.76	Malagasy	CASC, San Francisco, CA, USA	CASC
CASENT0020825	BLF06160	Pheidole	spinosa	Pheidole.MG154	1w.	pin	Fisher-Griswold Arthropod Team	2002-03-18	Toliara	Madagascar	25 m	-24.1006	43.76	Malagasy	CASC, San Francisco, CA, USA	CASC
CASENT0020887	BLF06160	Pheidole	spinosa	Pheidole.MG147	1w.	pin	Fisher-Griswold Arthropod Team	2002-03-18	Toliara	Madagascar	25 m	-24.1006	43.76	Malagasy	CASC, San Francisco, CA, USA	CASC
CASENT0020894	BLF06160	Pheidole	spinosa	Pheidole.MGs123	1s.	pin	Fisher-Griswold Arthropod Team	2002-03-18	Toliara	Madagascar	25 m	-24.1006	43.76	Malagasy	CASC, San Francisco, CA, USA	CASC
CASENT0020899	BLF06160	Pheidole	spinosa	Pheidole.MGs120	1s.	pin	Fisher-Griswold Arthropod Team	2002-03-18	Toliara	Madagascar	25 m	-24.1006	43.76	Malagasy	CASC, San Francisco, CA, USA	CASC
CASENT0020901	BLF06160	Pheidole	spinosa	Pheidole.MG155	1w.	pin	Fisher-Griswold Arthropod Team	2002-03-18	Toliara	Madagascar	25 m	-24.1006	43.76	Malagasy	CASC, San Francisco, CA, USA	CASC
CASENT0021399	BLF06070	Pheidole	spinosa	Pheidole.MG147	1w.	pin	Fisher-Griswold Arthropod Team	2002-03-12	Toliara	Madagascar	80 m	-22.2331	43.3663	Malagasy	CASC, San Francisco, CA, USA	CASC
CASENT0021412	BLF06070	Pheidole	spinosa	Pheidole.MG154	1w.	pin	Fisher-Griswold Arthropod Team	2002-03-12	Toliara	Madagascar	80 m	-22.2331	43.3663	Malagasy	CASC, San Francisco, CA, USA	CASC
CASENT0021499	BLF06070	Pheidole	spinosa	Pheidole.MGs120	1s.	pin	Fisher-Griswold Arthropod Team	2002-03-12	Toliara	Madagascar	80 m	-22.2331	43.3663	Malagasy	CASC, San Francisco, CA, USA	CASC
CASENT0021689	BLF06932	Pheidole	spinosa	Pheidole.MG151	1w.	pin	Fisher, Griswold et al.	2002-12-01	Mahajanga	Madagascar	20 m	-16.0517	45.9083	Malagasy	CASC, San Francisco, CA, USA	CASC
CASENT0021701	BLF06932	Pheidole	spinosa	Pheidole.MG150	1w.	pin	Fisher, Griswold et al.	2002-12-01	Mahajanga	Madagascar	20 m	-16.0517	45.9083	Malagasy	CASC, San Francisco, CA, USA	CASC
CASENT0021703	BLF06932	Pheidole	spinosa	Pheidole.MGs123	1s.	pin	Fisher, Griswold et al.	2002-12-01	Mahajanga	Madagascar	20 m	-16.0517	45.9083	Malagasy	CASC, San Francisco, CA, USA	CASC
CASENT0021704	BLF06932	Pheidole	spinosa	Pheidole.MG148	1w.	pin	Fisher, Griswold et al.	2002-12-01	Mahajanga	Madagascar	20 m	-16.0517	45.9083	Malagasy	CASC, San Francisco, CA, USA	CASC
CASENT0021705	BLF06932	Pheidole	spinosa	Pheidole.MG155	1w.	pin	Fisher, Griswold et al.	2002-12-01	Mahajanga	Madagascar	20 m	-16.0517	45.9083	Malagasy	CASC, San Francisco, CA, USA	CASC
CASENT0022555	BLF06692	Pheidole	spinosa	Pheidole.MG155	1w.	pin	Fisher, Griswold et al.	2002-11-19	Mahajanga	Madagascar	30 m	-16.925	44.3683	Malagasy	CASC, San Francisco, CA, USA	CASC
CASENT0022582	BLF06692	Pheidole	spinosa	Pheidole.MGs122	1s.	pin	Fisher, Griswold et al.	2002-11-19	Mahajanga	Madagascar	30 m	-16.925	44.3683	Malagasy	CASC, San Francisco, CA, USA	CASC
CASENT0022646	BLF06692	Pheidole	spinosa	Pheidole.MGs128	1s.	pin	Fisher, Griswold et al.	2002-11-19	Mahajanga	Madagascar	30 m	-16.925	44.3683	Malagasy	CASC, San Francisco, CA, USA	CASC
CASENT0022660	BLF06692	Pheidole	spinosa	Pheidole.MG150	1w.	pin	Fisher, Griswold et al.	2002-11-19	Mahajanga	Madagascar	30 m	-16.925	44.3683	Malagasy	CASC, San Francisco, CA, USA	CASC
CASENT0022664	BLF06692	Pheidole	spinosa	Pheidole.MGs123	1s.	pin	Fisher, Griswold et al.	2002-11-19	Mahajanga	Madagascar	30 m	-16.925	44.3683	Malagasy	CASC, San Francisco, CA, USA	CASC
CASENT0022670	BLF06692	Pheidole	spinosa	Pheidole.MG154	1w.	pin	Fisher, Griswold et al.	2002-11-19	Mahajanga	Madagascar	30 m	-16.925	44.3683	Malagasy	CASC, San Francisco, CA, USA	CASC
CASENT0022675	BLF06692	Pheidole	spinosa	Pheidole.MG148	1w.	pin	Fisher, Griswold et al.	2002-11-19	Mahajanga	Madagascar	30 m	-16.925	44.3683	Malagasy	CASC, San Francisco, CA, USA	CASC
CASENT0022729	BLF06692	Pheidole	spinosa	Pheidole.MG151	1w.	pin	Fisher, Griswold et al.	2002-11-19	Mahajanga	Madagascar	30 m	-16.925	44.3683	Malagasy	CASC, San Francisco, CA, USA	CASC
CASENT0022778	BLF06692	Pheidole	spinosa	Pheidole.MGs132	1s.	pin	Fisher, Griswold et al.	2002-11-19	Mahajanga	Madagascar	30 m	-16.925	44.3683	Malagasy	CASC, San Francisco, CA, USA	CASC
CASENT0022793	BLF06652	Pheidole	spinosa	Pheidole.MG154	1w.	pin	Fisher, Griswold et al.	2002-11-12	Mahajanga	Madagascar	100 m	-16.4067	45.31	Malagasy	CASC, San Francisco, CA, USA	CASC
CASENT0023574	BLF06506	Pheidole	spinosa	Pheidole.MG155	1w.	pin	Fisher, Griswold et al.	2002-11-08	Mahajanga	Madagascar	100 m	-16.3767	45.3267	Malagasy	CASC, San Francisco, CA, USA	CASC
CASENT0023578	BLF06506	Pheidole	spinosa	Pheidole.MG154	1w.	pin	Fisher, Griswold et al.	2002-11-08	Mahajanga	Madagascar	100 m	-16.3767	45.3267	Malagasy	CASC, San Francisco, CA, USA	CASC
CASENT0023581	BLF06506	Pheidole	spinosa	Pheidole.MG148	1w.	pin	Fisher, Griswold et al.	2002-11-08	Mahajanga	Madagascar	100 m	-16.3767	45.3267	Malagasy	CASC, San Francisco, CA, USA	CASC
CASENT0023582	BLF06506	Pheidole	spinosa	Pheidole.megacephala spinosa	1w.	pin	Fisher, Griswold et al.	2002-11-08	Mahajanga	Madagascar	100 m	-16.3767	45.3267	Malagasy	CASC, San Francisco, CA, USA	CASC
CASENT0023588	BLF06506	Pheidole	spinosa	Pheidole.MG010	1w.	pin	Fisher, Griswold et al.	2002-11-08	Mahajanga	Madagascar	100 m	-16.3767	45.3267	Malagasy	CASC, San Francisco, CA, USA	CASC
CASENT0023592	BLF06506	Pheidole	spinosa	Pheidole.MG154	1w.	pin	Fisher, Griswold et al.	2002-11-08	Mahajanga	Madagascar	100 m	-16.3767	45.3267	Malagasy	CASC, San Francisco, CA, USA	CASC
CASENT0023661	BLF06506	Pheidole	spinosa	Pheidole.MG150	1w.	pin	Fisher, Griswold et al.	2002-11-08	Mahajanga	Madagascar	100 m	-16.3767	45.3267	Malagasy	CASC, San Francisco, CA, USA	CASC
CASENT0023662	BLF06506	Pheidole	spinosa	Pheidole.MG151	1w.	pin	Fisher, Griswold et al.	2002-11-08	Mahajanga	Madagascar	100 m	-16.3767	45.3267	Malagasy	CASC, San Francisco, CA, USA	CASC
CASENT0023666	BLF06506	Pheidole	spinosa	Pheidole.MG148	1w.	pin	Fisher, Griswold et al.	2002-11-08	Mahajanga	Madagascar	100 m	-16.3767	45.3267	Malagasy	CASC, San Francisco, CA, USA	CASC
CASENT0023668	BLF06506	Pheidole	spinosa	Pheidole.MGs123	1s.	pin	Fisher, Griswold et al.	2002-11-08	Mahajanga	Madagascar	100 m	-16.3767	45.3267	Malagasy	CASC, San Francisco, CA, USA	CASC
CASENT0023670	BLF06506	Pheidole	spinosa	Pheidole.megacephala	1w.	pin	Fisher, Griswold et al.	2002-11-08	Mahajanga	Madagascar	100 m	-16.3767	45.3267	Malagasy	CASC, San Francisco, CA, USA	CASC
CASENT0023895	BLF07151	Pheidole	spinosa	Pheidole.MG154	1w.	pin	Fisher, Griswold et al.	2003-01-22	Fianarantsoa	Madagascar	1550 m	-20.5933	46.5633	Malagasy	CASC, San Francisco, CA, USA	CASC
CASENT0023966	BLF07893	Pheidole	spinosa	Pheidole.MG155	1w.	pin	Fisher, Griswold et al.	2003-02-21	Toliara	Madagascar	1050 m	-22.675	44.1867	Malagasy	CASC, San Francisco, CA, USA	CASC
CASENT0024042	BLF07893	Pheidole	spinosa	Pheidole.MG154	1w.	pin	Fisher, Griswold et al.	2003-02-21	Toliara	Madagascar	1050 m	-22.675	44.1867	Malagasy	CASC, San Francisco, CA, USA	CASC
CASENT0024072	BLF07893	Pheidole	spinosa	Pheidole.MGs122	1s.	pin	Fisher, Griswold et al.	2003-02-21	Toliara	Madagascar	1050 m	-22.675	44.1867	Malagasy	CASC, San Francisco, CA, USA	CASC
CASENT0024983	BLF07151	Pheidole	spinosa	Pheidole.MG158	1w.	pin	Fisher, Griswold et al.	2003-01-22	Fianarantsoa	Madagascar	1550 m	-20.5933	46.5633	Malagasy	CASC, San Francisco, CA, USA	CASC
CASENT0025405	BLF06812	Pheidole	spinosa	Pheidole.MG154	1w.	pin	Fisher, Griswold et al.	2002-11-26	Mahajanga	Madagascar	10 m	-16.01	45.265	Malagasy	CASC, San Francisco, CA, USA	CASC
CASENT0025407	BLF06812	Pheidole	spinosa	Pheidole.MGs128	1s.	pin	Fisher, Griswold et al.	2002-11-26	Mahajanga	Madagascar	10 m	-16.01	45.265	Malagasy	CASC, San Francisco, CA, USA	CASC
CASENT0025413	BLF06812	Pheidole	spinosa	Pheidole.MGs123	1s.	pin	Fisher, Griswold et al.	2002-11-26	Mahajanga	Madagascar	10 m	-16.01	45.265	Malagasy	CASC, San Francisco, CA, USA	CASC
CASENT0025448	BLF07916	Pheidole	spinosa	Pheidole.MGs120	1s.	pin	Fisher, Griswold et al.	2003-02-22	Toliara	Madagascar	1300 m	-22.6433	44.1717	Malagasy	CASC, San Francisco, CA, USA	CASC
CASENT0025452	BLF07916	Pheidole	spinosa	Pheidole.MG154	1w.	pin	Fisher, Griswold et al.	2003-02-22	Toliara	Madagascar	1300 m	-22.6433	44.1717	Malagasy	CASC, San Francisco, CA, USA	CASC
CASENT0028269	BLF07020	Pheidole	spinosa	Pheidole.MG154	1w.	pin	Fisher, Griswold et al.	2003-01-13	Toliara	Madagascar	1050 m	-18.2667	45.4067	Malagasy	CASC, San Francisco, CA, USA	CASC
CASENT0028278	BLF07020	Pheidole	spinosa	Pheidole.MGs128	1s.	pin	Fisher, Griswold et al.	2003-01-13	Toliara	Madagascar	1050 m	-18.2667	45.4067	Malagasy	CASC, San Francisco, CA, USA	CASC
CASENT0028289	BLF07020	Pheidole	spinosa	Pheidole.MG155	1w.	pin	Fisher, Griswold et al.	2003-01-13	Toliara	Madagascar	1050 m	-18.2667	45.4067	Malagasy	CASC, San Francisco, CA, USA	CASC
CASENT0028300	BLF07020	Pheidole	spinosa	Pheidole.MGs128	1s.	pin	Fisher, Griswold et al.	2003-01-13	Toliara	Madagascar	1050 m	-18.2667	45.4067	Malagasy	CASC, San Francisco, CA, USA	CASC
CASENT0031008	BLF07820	Pheidole	spinosa	Pheidole.MG155	1w.	pin	Fisher, Griswold et al.	2003-02-18	Toliara	Madagascar	1100 m	-22.675	44.19	Malagasy	CASC, San Francisco, CA, USA	CASC
CASENT0031014	BLF07820	Pheidole	spinosa	Pheidole.MGs123	1s.	pin	Fisher, Griswold et al.	2003-02-18	Toliara	Madagascar	1100 m	-22.675	44.19	Malagasy	CASC, San Francisco, CA, USA	CASC
CASENT0031058	BLF07382	Pheidole	spinosa	Pheidole.megacephala	1w.	pin	Fisher, Griswold et al.	2003-02-01	Fianarantsoa	Madagascar	700 m	-22.5917	45.1283	Malagasy	CASC, San Francisco, CA, USA	CASC
CASENT0031064	BLF07382	Pheidole	spinosa	Pheidole.megacephala spinosa	1w.	pin	Fisher, Griswold et al.	2003-02-01	Fianarantsoa	Madagascar	700 m	-22.5917	45.1283	Malagasy	CASC, San Francisco, CA, USA	CASC
CASENT0031066	BLF07382	Pheidole	spinosa	Pheidole.MGs126	1s.	pin	Fisher, Griswold et al.	2003-02-01	Fianarantsoa	Madagascar	700 m	-22.5917	45.1283	Malagasy	CASC, San Francisco, CA, USA	CASC
CASENT0031067	BLF07382	Pheidole	spinosa	Pheidole.MGs126	1s.	pin	Fisher, Griswold et al.	2003-02-01	Fianarantsoa	Madagascar	700 m	-22.5917	45.1283	Malagasy	CASC, San Francisco, CA, USA	CASC
CASENT0031081	BLF07820	Pheidole	spinosa	Pheidole.MG150	1w.	pin	Fisher, Griswold et al.	2003-02-18	Toliara	Madagascar	1100 m	-22.675	44.19	Malagasy	CASC, San Francisco, CA, USA	CASC
CASENT0031125	BLF07382	Pheidole	spinosa	Pheidole.MG147	1w.	pin	Fisher, Griswold et al.	2003-02-01	Fianarantsoa	Madagascar	700 m	-22.5917	45.1283	Malagasy	CASC, San Francisco, CA, USA	CASC
CASENT0031136	BLF07382	Pheidole	spinosa	Pheidole.megacephala spinosa	1s.	pin	Fisher, Griswold et al.	2003-02-01	Fianarantsoa	Madagascar	700 m	-22.5917	45.1283	Malagasy	CASC, San Francisco, CA, USA	CASC
CASENT0031153	BLF07382	Pheidole	spinosa	Pheidole.MG154	1w.	pin	Fisher, Griswold et al.	2003-02-01	Fianarantsoa	Madagascar	700 m	-22.5917	45.1283	Malagasy	CASC, San Francisco, CA, USA	CASC
CASENT0031174	BLF07382	Pheidole	spinosa	Pheidole.MG150	1w.	pin	Fisher, Griswold et al.	2003-02-01	Fianarantsoa	Madagascar	700 m	-22.5917	45.1283	Malagasy	CASC, San Francisco, CA, USA	CASC
CASENT0031182	BLF07382	Pheidole	spinosa	Pheidole.MG150	1w.	pin	Fisher, Griswold et al.	2003-02-01	Fianarantsoa	Madagascar	700 m	-22.5917	45.1283	Malagasy	CASC, San Francisco, CA, USA	CASC
CASENT0031183	BLF07382	Pheidole	spinosa	Pheidole.MG155	1w.	pin	Fisher, Griswold et al.	2003-02-01	Fianarantsoa	Madagascar	700 m	-22.5917	45.1283	Malagasy	CASC, San Francisco, CA, USA	CASC
CASENT0031188	BLF07382	Pheidole	spinosa	Pheidole.megacephala spinosa	1s.	pin	Fisher, Griswold et al.	2003-02-01	Fianarantsoa	Madagascar	700 m	-22.5917	45.1283	Malagasy	CASC, San Francisco, CA, USA	CASC
CASENT0031693	BLF07651	Pheidole	spinosa	Pheidole.MGs122	1s.	pin	Fisher, Griswold et al.	2003-02-10	Fianarantsoa	Madagascar	500 m	-22.3133	45.2917	Malagasy	CASC, San Francisco, CA, USA	CASC
CASENT0031697	BLF07651	Pheidole	spinosa	Pheidole.MG155	1w.	pin	Fisher, Griswold et al.	2003-02-10	Fianarantsoa	Madagascar	500 m	-22.3133	45.2917	Malagasy	CASC, San Francisco, CA, USA	CASC
CASENT0031760	BLF07651	Pheidole	spinosa	Pheidole.MG148	1w.	pin	Fisher, Griswold et al.	2003-02-10	Fianarantsoa	Madagascar	500 m	-22.3133	45.2917	Malagasy	CASC, San Francisco, CA, USA	CASC
CASENT0031768	BLF07651	Pheidole	spinosa	Pheidole.MGs123	1s.	pin	Fisher, Griswold et al.	2003-02-10	Fianarantsoa	Madagascar	500 m	-22.3133	45.2917	Malagasy	CASC, San Francisco, CA, USA	CASC
CASENT0031788	BLF07651	Pheidole	spinosa	Pheidole.MG150	1w.	pin	Fisher, Griswold et al.	2003-02-10	Fianarantsoa	Madagascar	500 m	-22.3133	45.2917	Malagasy	CASC, San Francisco, CA, USA	CASC
CASENT0031804	BLF07651	Pheidole	spinosa	Pheidole.MGs128	1s.	pin	Fisher, Griswold et al.	2003-02-10	Fianarantsoa	Madagascar	500 m	-22.3133	45.2917	Malagasy	CASC, San Francisco, CA, USA	CASC
CASENT0031820	BLF07651	Pheidole	spinosa	Pheidole.MG151	1w.	pin	Fisher, Griswold et al.	2003-02-10	Fianarantsoa	Madagascar	500 m	-22.3133	45.2917	Malagasy	CASC, San Francisco, CA, USA	CASC
CASENT0031825	BLF07651	Pheidole	spinosa	Pheidole.MG150	1w.	pin	Fisher, Griswold et al.	2003-02-10	Fianarantsoa	Madagascar	500 m	-22.3133	45.2917	Malagasy	CASC, San Francisco, CA, USA	CASC
CASENT0031855	BLF07651	Pheidole	spinosa	Pheidole.MG154	1w.	pin	Fisher, Griswold et al.	2003-02-10	Fianarantsoa	Madagascar	500 m	-22.3133	45.2917	Malagasy	CASC, San Francisco, CA, USA	CASC
CASENT0031909	BLF07820	Pheidole	spinosa	Pheidole.MG154	1w.	pin	Fisher, Griswold et al.	2003-02-18	Toliara	Madagascar	1100 m	-22.675	44.19	Malagasy	CASC, San Francisco, CA, USA	CASC
CASENT0032001	BLF06446	Pheidole	spinosa	Pheidole.MG150	1w.	pin	Fisher, Griswold et al.	2002-11-04	Mahajanga	Madagascar	140 m	-16.4667	45.35	Malagasy	CASC, San Francisco, CA, USA	CASC
CASENT0032004	BLF06446	Pheidole	spinosa	Pheidole.MGs122	1s.	pin	Fisher, Griswold et al.	2002-11-04	Mahajanga	Madagascar	140 m	-16.4667	45.35	Malagasy	CASC, San Francisco, CA, USA	CASC
CASENT0032008	BLF06446	Pheidole	spinosa	Pheidole.MG154	1w.	pin	Fisher, Griswold et al.	2002-11-04	Mahajanga	Madagascar	140 m	-16.4667	45.35	Malagasy	CASC, San Francisco, CA, USA	CASC
CASENT0032010	BLF06446	Pheidole	spinosa	Pheidole.MG010	1w.	pin	Fisher, Griswold et al.	2002-11-04	Mahajanga	Madagascar	140 m	-16.4667	45.35	Malagasy	CASC, San Francisco, CA, USA	CASC
CASENT0032018	BLF06446	Pheidole	spinosa	Pheidole.MG150	1w.	pin	Fisher, Griswold et al.	2002-11-04	Mahajanga	Madagascar	140 m	-16.4667	45.35	Malagasy	CASC, San Francisco, CA, USA	CASC
CASENT0032019	BLF06446	Pheidole	spinosa	Pheidole.MG148	1w.	pin	Fisher, Griswold et al.	2002-11-04	Mahajanga	Madagascar	140 m	-16.4667	45.35	Malagasy	CASC, San Francisco, CA, USA	CASC
CASENT0032026	BLF06446	Pheidole	spinosa	Pheidole.MG146	1w.	pin	Fisher, Griswold et al.	2002-11-04	Mahajanga	Madagascar	140 m	-16.4667	45.35	Malagasy	CASC, San Francisco, CA, USA	CASC
CASENT0032027	BLF06446	Pheidole	spinosa	Pheidole.megacephala spinosa	1w.	pin	Fisher, Griswold et al.	2002-11-04	Mahajanga	Madagascar	140 m	-16.4667	45.35	Malagasy	CASC, San Francisco, CA, USA	CASC
CASENT0032028	BLF06446	Pheidole	spinosa	Pheidole.MGs123	1s.	pin	Fisher, Griswold et al.	2002-11-04	Mahajanga	Madagascar	140 m	-16.4667	45.35	Malagasy	CASC, San Francisco, CA, USA	CASC
CASENT0032083	BLF07820	Pheidole	spinosa	Pheidole.MG153	1w.	pin	Fisher, Griswold et al.	2003-02-18	Toliara	Madagascar	1100 m	-22.675	44.19	Malagasy	CASC, San Francisco, CA, USA	CASC
CASENT0036053	BLF07510	Pheidole	spinosa	Pheidole.MG148	1w.	pin	Fisher, Griswold et al.	2003-02-05	Toliara	Madagascar	770 m	-22.8433	44.71	Malagasy	CASC, San Francisco, CA, USA	CASC
CASENT0036058	BLF07510	Pheidole	spinosa	Pheidole.MG148	1w.	pin	Fisher, Griswold et al.	2003-02-05	Toliara	Madagascar	770 m	-22.8433	44.71	Malagasy	CASC, San Francisco, CA, USA	CASC
CASENT0036084	BLF07510	Pheidole	spinosa	Pheidole.MG150	1w.	pin	Fisher, Griswold et al.	2003-02-05	Toliara	Madagascar	770 m	-22.8433	44.71	Malagasy	CASC, San Francisco, CA, USA	CASC
CASENT0036135	BLF07510	Pheidole	spinosa	Pheidole.MG155	1w.	pin	Fisher, Griswold et al.	2003-02-05	Toliara	Madagascar	770 m	-22.8433	44.71	Malagasy	CASC, San Francisco, CA, USA	CASC
CASENT0036161	BLF07510	Pheidole	spinosa	Pheidole.MGs122	1s.	pin	Fisher, Griswold et al.	2003-02-05	Toliara	Madagascar	770 m	-22.8433	44.71	Malagasy	CASC, San Francisco, CA, USA	CASC
CASENT0036501	BLF07300	Pheidole	spinosa	Pheidole.MG151	1w.	pin	Fisher, Griswold et al.	2003-01-27	Fianarantsoa	Madagascar	725 m	-22.4817	45.4617	Malagasy	CASC, San Francisco, CA, USA	CASC
CASENT0036527	BLF07300	Pheidole	spinosa	Pheidole.MG010	1w.	pin	Fisher, Griswold et al.	2003-01-27	Fianarantsoa	Madagascar	725 m	-22.4817	45.4617	Malagasy	CASC, San Francisco, CA, USA	CASC
CASENT0036617	BLF07300	Pheidole	spinosa	Pheidole.MG150	1w.	pin	Fisher, Griswold et al.	2003-01-27	Fianarantsoa	Madagascar	725 m	-22.4817	45.4617	Malagasy	CASC, San Francisco, CA, USA	CASC
CASENT0036618	BLF07300	Pheidole	spinosa	Pheidole.MGs123	1s.	pin	Fisher, Griswold et al.	2003-01-27	Fianarantsoa	Madagascar	725 m	-22.4817	45.4617	Malagasy	CASC, San Francisco, CA, USA	CASC
CASENT0036725	BLF07300	Pheidole	spinosa	Pheidole.MGs128	1s.	pin	Fisher, Griswold et al.	2003-01-27	Fianarantsoa	Madagascar	725 m	-22.4817	45.4617	Malagasy	CASC, San Francisco, CA, USA	CASC
CASENT0036783	BLF07300	Pheidole	spinosa	Pheidole.MG155	1w.	pin	Fisher, Griswold et al.	2003-01-27	Fianarantsoa	Madagascar	725 m	-22.4817	45.4617	Malagasy	CASC, San Francisco, CA, USA	CASC
CASENT0036875	BLF07300	Pheidole	spinosa	Pheidole.MGs122	1s.	pin	Fisher, Griswold et al.	2003-01-27	Fianarantsoa	Madagascar	725 m	-22.4817	45.4617	Malagasy	CASC, San Francisco, CA, USA	CASC
CASENT0037688	BLF08002	Pheidole	spinosa	Pheidole.MG151	1w.	pin	Fisher, Griswold et al.	2003-03-08	Toamasina	Madagascar	470 m	-15.1883	49.615	Malagasy	CASC, San Francisco, CA, USA	CASC
CASENT0038074	BLF06582	Pheidole	spinosa	Pheidole.MG154	1w.	pin	Fisher, Griswold et al.	2002-11-12	Mahajanga	Madagascar	100 m	-16.4067	45.31	Malagasy	CASC, San Francisco, CA, USA	CASC
CASENT0038083	BLF06582	Pheidole	spinosa	Pheidole.MG151	1w.	pin	Fisher, Griswold et al.	2002-11-12	Mahajanga	Madagascar	100 m	-16.4067	45.31	Malagasy	CASC, San Francisco, CA, USA	CASC
CASENT0038088	BLF06582	Pheidole	spinosa	Pheidole.MG151	1w.	pin	Fisher, Griswold et al.	2002-11-12	Mahajanga	Madagascar	100 m	-16.4067	45.31	Malagasy	CASC, San Francisco, CA, USA	CASC
CASENT0038090	BLF06582	Pheidole	spinosa	Pheidole.MG154	1w.	pin	Fisher, Griswold et al.	2002-11-12	Mahajanga	Madagascar	100 m	-16.4067	45.31	Malagasy	CASC, San Francisco, CA, USA	CASC
CASENT0038843	BLF06582	Pheidole	spinosa	Pheidole.MGs132	1s.	pin	Fisher, Griswold et al.	2002-11-12	Mahajanga	Madagascar	100 m	-16.4067	45.31	Malagasy	CASC, San Francisco, CA, USA	CASC
CASENT0038845	BLF06582	Pheidole	spinosa	Pheidole.MG155	1w.	pin	Fisher, Griswold et al.	2002-11-12	Mahajanga	Madagascar	100 m	-16.4067	45.31	Malagasy	CASC, San Francisco, CA, USA	CASC
CASENT0038872	BLF06582	Pheidole	spinosa	Pheidole.MG148	1w.	pin	Fisher, Griswold et al.	2002-11-12	Mahajanga	Madagascar	100 m	-16.4067	45.31	Malagasy	CASC, San Francisco, CA, USA	CASC
CASENT0038886	BLF06582	Pheidole	spinosa	Pheidole.MG155	1w.	pin	Fisher, Griswold et al.	2002-11-12	Mahajanga	Madagascar	100 m	-16.4067	45.31	Malagasy	CASC, San Francisco, CA, USA	CASC
CASENT0038951	BLF06582	Pheidole	spinosa	Pheidole.MGs123	1s.	pin	Fisher, Griswold et al.	2002-11-12	Mahajanga	Madagascar	100 m	-16.4067	45.31	Malagasy	CASC, San Francisco, CA, USA	CASC
CASENT0038952	BLF06582	Pheidole	spinosa	Pheidole.MG146	1w.	pin	Fisher, Griswold et al.	2002-11-12	Mahajanga	Madagascar	100 m	-16.4067	45.31	Malagasy	CASC, San Francisco, CA, USA	CASC
CASENT0038956	BLF06582	Pheidole	spinosa	Pheidole.MGs128	1s.	pin	Fisher, Griswold et al.	2002-11-12	Mahajanga	Madagascar	100 m	-16.4067	45.31	Malagasy	CASC, San Francisco, CA, USA	CASC
CASENT0040745	BLF09974	Pheidole	spinosa	Pheidole.MG151	1w.	pin	B.L.Fisher	2003-12-10	Antsiranana	Madagascar	175 m	-12.97	49.7	Malagasy	CASC, San Francisco, CA, USA	CASC
CASENT0040750	BLF09974	Pheidole	spinosa	Pheidole.MG150	1w.	pin	B.L.Fisher	2003-12-10	Antsiranana	Madagascar	175 m	-12.97	49.7	Malagasy	CASC, San Francisco, CA, USA	CASC
CASENT0040753	BLF09974	Pheidole	spinosa	Pheidole.MG155	1w.	pin	B.L.Fisher	2003-12-10	Antsiranana	Madagascar	175 m	-12.97	49.7	Malagasy	CASC, San Francisco, CA, USA	CASC
CASENT0040758	BLF09974	Pheidole	spinosa	Pheidole.MGs128	1s.	pin	B.L.Fisher	2003-12-10	Antsiranana	Madagascar	175 m	-12.97	49.7	Malagasy	CASC, San Francisco, CA, USA	CASC
CASENT0040843	BLF09974	Pheidole	spinosa	Pheidole.MGs128	1s.	pin	B.L.Fisher	2003-12-10	Antsiranana	Madagascar	175 m	-12.97	49.7	Malagasy	CASC, San Francisco, CA, USA	CASC
CASENT0041336	BLF09426	Pheidole	spinosa	Pheidole.megacephala	1w.	pin	B.L.Fisher	2003-11-27	Antsiranana	Madagascar	30 m	-13.0833	49.9083	Malagasy	CASC, San Francisco, CA, USA	CASC
CASENT0041348	BLF09426	Pheidole	spinosa	Pheidole.MG151	1w.	pin	B.L.Fisher	2003-11-27	Antsiranana	Madagascar	30 m	-13.0833	49.9083	Malagasy	CASC, San Francisco, CA, USA	CASC
CASENT0041353	BLF09426	Pheidole	spinosa	Pheidole.MG150	1w.	pin	B.L.Fisher	2003-11-27	Antsiranana	Madagascar	30 m	-13.0833	49.9083	Malagasy	CASC, San Francisco, CA, USA	CASC
CASENT0041363	BLF09426	Pheidole	spinosa	Pheidole.MG155	1w.	pin	B.L.Fisher	2003-11-27	Antsiranana	Madagascar	30 m	-13.0833	49.9083	Malagasy	CASC, San Francisco, CA, USA	CASC
CASENT0041374	BLF09426	Pheidole	spinosa	Pheidole.MGs122	1s.	pin	B.L.Fisher	2003-11-27	Antsiranana	Madagascar	30 m	-13.0833	49.9083	Malagasy	CASC, San Francisco, CA, USA	CASC
CASENT0041427	BLF09426	Pheidole	spinosa	Pheidole.MG145	1w.	pin	B.L.Fisher	2003-11-27	Antsiranana	Madagascar	30 m	-13.0833	49.9083	Malagasy	CASC, San Francisco, CA, USA	CASC
CASENT0041436	BLF09426	Pheidole	spinosa	Pheidole.MG146	1w.	pin	B.L.Fisher	2003-11-27	Antsiranana	Madagascar	30 m	-13.0833	49.9083	Malagasy	CASC, San Francisco, CA, USA	CASC
CASENT0041443	BLF09426	Pheidole	spinosa	Pheidole.MG154	1w.	pin	B.L.Fisher	2003-11-27	Antsiranana	Madagascar	30 m	-13.0833	49.9083	Malagasy	CASC, San Francisco, CA, USA	CASC
CASENT0041444	BLF09426	Pheidole	spinosa	Pheidole.MGs128	1s.	pin	B.L.Fisher	2003-11-27	Antsiranana	Madagascar	30 m	-13.0833	49.9083	Malagasy	CASC, San Francisco, CA, USA	CASC
CASENT0041445	BLF09426	Pheidole	spinosa	Pheidole.MGs123	1s.	pin	B.L.Fisher	2003-11-27	Antsiranana	Madagascar	30 m	-13.0833	49.9083	Malagasy	CASC, San Francisco, CA, USA	CASC
CASENT0041453	BLF09426	Pheidole	spinosa	Pheidole.megacephala spinosa	1w.	pin	B.L.Fisher	2003-11-27	Antsiranana	Madagascar	30 m	-13.0833	49.9083	Malagasy	CASC, San Francisco, CA, USA	CASC
CASENT0041725	BLF09556	Pheidole	spinosa	Pheidole.MG148	1w.	pin	B.L.Fisher	2003-12-01	Antsiranana	Madagascar	375 m	-13.255	49.6167	Malagasy	CASC, San Francisco, CA, USA	CASC
CASENT0041799	BLF09556	Pheidole	spinosa	Pheidole.MG151	1w.	pin	B.L.Fisher	2003-12-01	Antsiranana	Madagascar	375 m	-13.255	49.6167	Malagasy	CASC, San Francisco, CA, USA	CASC
CASENT0041810	BLF09556	Pheidole	spinosa	Pheidole.MGs128	1s.	pin	B.L.Fisher	2003-12-01	Antsiranana	Madagascar	375 m	-13.255	49.6167	Malagasy	CASC, San Francisco, CA, USA	CASC
CASENT0041825	BLF09556	Pheidole	spinosa	Pheidole.MG150	1w.	pin	B.L.Fisher	2003-12-01	Antsiranana	Madagascar	375 m	-13.255	49.6167	Malagasy	CASC, San Francisco, CA, USA	CASC
CASENT0041831	BLF09556	Pheidole	spinosa	Pheidole.MG145	1w.	pin	B.L.Fisher	2003-12-01	Antsiranana	Madagascar	375 m	-13.255	49.6167	Malagasy	CASC, San Francisco, CA, USA	CASC
CASENT0041908	BLF09556	Pheidole	spinosa	Pheidole.MGs123	1s.	pin	B.L.Fisher	2003-12-01	Antsiranana	Madagascar	375 m	-13.255	49.6167	Malagasy	CASC, San Francisco, CA, USA	CASC
CASENT0042337	BLF10116	Pheidole	spinosa	Pheidole.MGs123	1s.	pin	B.L.Fisher	2003-12-12	Antsiranana	Madagascar	550 m	-13.2117	49.5567	Malagasy	CASC, San Francisco, CA, USA	CASC
CASENT0043157	BLF09656	Pheidole	spinosa	Pheidole.MG150	1w.	pin	B.L.Fisher	2003-12-03	Antsiranana	Madagascar	800 m	-13.2633	49.6033	Malagasy	CASC, San Francisco, CA, USA	CASC
CASENT0043163	BLF09656	Pheidole	spinosa	Pheidole.MG155	1w.	pin	B.L.Fisher	2003-12-03	Antsiranana	Madagascar	800 m	-13.2633	49.6033	Malagasy	CASC, San Francisco, CA, USA	CASC
CASENT0043338	BLF09656	Pheidole	spinosa	Pheidole.MGs128	1s.	pin	B.L.Fisher	2003-12-03	Antsiranana	Madagascar	800 m	-13.2633	49.6033	Malagasy	CASC, San Francisco, CA, USA	CASC
CASENT0043345	BLF09656	Pheidole	spinosa	Pheidole.MGs122	1s.	pin	B.L.Fisher	2003-12-03	Antsiranana	Madagascar	800 m	-13.2633	49.6033	Malagasy	CASC, San Francisco, CA, USA	CASC
CASENT0043351	BLF09656	Pheidole	spinosa	Pheidole.MG146	1w.	pin	B.L.Fisher	2003-12-03	Antsiranana	Madagascar	800 m	-13.2633	49.6033	Malagasy	CASC, San Francisco, CA, USA	CASC
CASENT0043384	BLF09800	Pheidole	spinosa	Pheidole.MG155	1w.	pin	B.L.Fisher	2003-12-05	Antsiranana	Madagascar	1100 m	-13.2633	49.6	Malagasy	CASC, San Francisco, CA, USA	CASC
CASENT0043397	BLF09800	Pheidole	spinosa	Pheidole.MG154	1w.	pin	B.L.Fisher	2003-12-05	Antsiranana	Madagascar	1100 m	-13.2633	49.6	Malagasy	CASC, San Francisco, CA, USA	CASC
CASENT0043453	BLF09800	Pheidole	spinosa	Pheidole.MGs128	1s.	pin	B.L.Fisher	2003-12-05	Antsiranana	Madagascar	1100 m	-13.2633	49.6	Malagasy	CASC, San Francisco, CA, USA	CASC
CASENT0044108	BLF10260	Pheidole	spinosa	Pheidole.MG151	1w.	pin	B.L.Fisher	2003-12-15	Antsiranana	Madagascar	425 m	-13.1183	49.23	Malagasy	CASC, San Francisco, CA, USA	CASC
CASENT0044203	BLF10260	Pheidole	spinosa	Pheidole.MG154	1w.	pin	B.L.Fisher	2003-12-15	Antsiranana	Madagascar	425 m	-13.1183	49.23	Malagasy	CASC, San Francisco, CA, USA	CASC
CASENT0044206	BLF10260	Pheidole	spinosa	Pheidole.MGs128	1s.	pin	B.L.Fisher	2003-12-15	Antsiranana	Madagascar	425 m	-13.1183	49.23	Malagasy	CASC, San Francisco, CA, USA	CASC
CASENT0044306	BLF09872	Pheidole	spinosa	Pheidole.MG145	1w.	pin	B.L.Fisher	2003-12-07	Antsiranana	Madagascar	150 m	-13.1667	49.71	Malagasy	CASC, San Francisco, CA, USA	CASC
CASENT0044316	BLF09872	Pheidole	spinosa	Pheidole.MG148	1w.	pin	B.L.Fisher	2003-12-07	Antsiranana	Madagascar	150 m	-13.1667	49.71	Malagasy	CASC, San Francisco, CA, USA	CASC
CASENT0044317	BLF09872	Pheidole	spinosa	Pheidole.MG151	1w.	pin	B.L.Fisher	2003-12-07	Antsiranana	Madagascar	150 m	-13.1667	49.71	Malagasy	CASC, San Francisco, CA, USA	CASC
CASENT0044429	BLF09872	Pheidole	spinosa	Pheidole.MG154	1w.	pin	B.L.Fisher	2003-12-07	Antsiranana	Madagascar	150 m	-13.1667	49.71	Malagasy	CASC, San Francisco, CA, USA	CASC
CASENT0044446	BLF09872	Pheidole	spinosa	Pheidole.MG150	1w.	pin	B.L.Fisher	2003-12-07	Antsiranana	Madagascar	150 m	-13.1667	49.71	Malagasy	CASC, San Francisco, CA, USA	CASC
CASENT0044505	BLF09872	Pheidole	spinosa	Pheidole.MGs128	1s.	pin	B.L.Fisher	2003-12-07	Antsiranana	Madagascar	150 m	-13.1667	49.71	Malagasy	CASC, San Francisco, CA, USA	CASC
CASENT0044507	BLF09872	Pheidole	spinosa	Pheidole.MG154	1w.	pin	B.L.Fisher	2003-12-07	Antsiranana	Madagascar	150 m	-13.1667	49.71	Malagasy	CASC, San Francisco, CA, USA	CASC
CASENT0044509	BLF09872	Pheidole	spinosa	Pheidole.MGs129	1s.	pin	B.L.Fisher	2003-12-07	Antsiranana	Madagascar	150 m	-13.1667	49.71	Malagasy	CASC, San Francisco, CA, USA	CASC
CASENT0045820	BLF08722	Pheidole	spinosa	Pheidole.MGs122	1s.	pin	B.L.Fisher et al.	2003-11-12	Antsiranana	Madagascar	450 m	-14.4367	49.775	Malagasy	CASC, San Francisco, CA, USA	CASC
CASENT0045830	BLF08722	Pheidole	spinosa	Pheidole.MG151	1s.	pin	B.L.Fisher et al.	2003-11-12	Antsiranana	Madagascar	450 m	-14.4367	49.775	Malagasy	CASC, San Francisco, CA, USA	CASC
CASENT0045835	BLF08722	Pheidole	spinosa	Pheidole.MGs128	1s.	pin	B.L.Fisher et al.	2003-11-12	Antsiranana	Madagascar	450 m	-14.4367	49.775	Malagasy	CASC, San Francisco, CA, USA	CASC
CASENT0045864	BLF08722	Pheidole	spinosa	Pheidole.MGs128	1s.	pin	B.L.Fisher et al.	2003-11-12	Antsiranana	Madagascar	450 m	-14.4367	49.775	Malagasy	CASC, San Francisco, CA, USA	CASC
CASENT0045871	BLF08722	Pheidole	spinosa	Pheidole.MG150	1w.	pin	B.L.Fisher et al.	2003-11-12	Antsiranana	Madagascar	450 m	-14.4367	49.775	Malagasy	CASC, San Francisco, CA, USA	CASC
CASENT0045986	BLF08722	Pheidole	spinosa	Pheidole.MG154	1w.	pin	B.L.Fisher et al.	2003-11-12	Antsiranana	Madagascar	450 m	-14.4367	49.775	Malagasy	CASC, San Francisco, CA, USA	CASC
CASENT0046489	BLF10502	Pheidole	spinosa	Pheidole.MG154	1w.	pin	Malagasy ant team	2004-03-21	Toamasina	Madagascar	1068 m	-18.8062	48.3371	Malagasy	CASC, San Francisco, CA, USA	CASC
CASENT0047609	BLF10501	Pheidole	spinosa	Pheidole.MG154	1w.	pin	Malagasy ant team	2004-03-21	Toamasina	Madagascar	1075 m	-18.8508	48.32	Malagasy	CASC, San Francisco, CA, USA	CASC
CASENT0047758	BLF06929	Pheidole	spinosa	Pheidole.MG148	1w.	pin	Fisher, Griswold et al.	2002-12-01	Mahajanga	Madagascar	20 m	-16.0517	45.9083	Malagasy	CASC, San Francisco, CA, USA	CASC
CASENT0048398	BLF10627	Pheidole	spinosa	Pheidole.MGs129	1s.	pin	Malagasy ant team	2004-03-24	Toamasina	Madagascar	1070 m	-18.8708	48.3474	Malagasy	CASC, San Francisco, CA, USA	CASC
CASENT0048606	BLF07649	Pheidole	spinosa	Pheidole.MG146	1w.	pin	Fisher, Griswold et al.	2003-02-09	Fianarantsoa	Madagascar	990 m	-22.2983	45.3517	Malagasy	CASC, San Francisco, CA, USA	CASC
CASENT0048608	BLF07649	Pheidole	spinosa	Pheidole.MGs123	1s.	pin	Fisher, Griswold et al.	2003-02-09	Fianarantsoa	Madagascar	990 m	-22.2983	45.3517	Malagasy	CASC, San Francisco, CA, USA	CASC
CASENT0048628	BLF08725	Pheidole	spinosa	Pheidole.MG154	1w.	pin	B.L.Fisher et al.	2003-11-12	Antsiranana	Madagascar	450 m	-14.4367	49.775	Malagasy	CASC, San Francisco, CA, USA	CASC
CASENT0048644	BLF06694	Pheidole	spinosa	Pheidole.MGs122	1s.	pin	Fisher, Griswold et al.	2002-11-19	Mahajanga	Madagascar	30 m	-16.925	44.3683	Malagasy	CASC, San Francisco, CA, USA	CASC
CASENT0048653	BLF06694	Pheidole	spinosa	Pheidole.MG155	1w.	pin	Fisher, Griswold et al.	2002-11-19	Mahajanga	Madagascar	30 m	-16.925	44.3683	Malagasy	CASC, San Francisco, CA, USA	CASC
CASENT0048790	BLF09975	Pheidole	spinosa	Pheidole.MG154	1w.	pin	B.L.Fisher	2003-12-10	Antsiranana	Madagascar	175 m	-12.97	49.7	Malagasy	CASC, San Francisco, CA, USA	CASC
CASENT0048808	BLF09873	Pheidole	spinosa	Pheidole.MG145	1w.	pin	B.L.Fisher	2003-12-07	Antsiranana	Madagascar	150 m	-13.1667	49.71	Malagasy	CASC, San Francisco, CA, USA	CASC
CASENT0048850	BLF09427	Pheidole	spinosa	Pheidole.MG151	1w.	pin	B.L.Fisher	2003-11-27	Antsiranana	Madagascar	30 m	-13.0833	49.9083	Malagasy	CASC, San Francisco, CA, USA	CASC
CASENT0048911	BLF10772	Pheidole	spinosa	Pheidole.MG150	2w., 1s.	pin	Malagasy ant team	2004-04-16	Toamasina	Madagascar	10 m	-17.2833	49.4167	Malagasy	CASC, San Francisco, CA, USA	CASC
CASENT0048913	BLF10780	Pheidole	spinosa	Pheidole.MG151	1w., 1s.	pin	Malagasy ant team	2004-04-17	Toamasina	Madagascar	10 m	-17.2833	49.4167	Malagasy	CASC, San Francisco, CA, USA	CASC
CASENT0048914	BLF10781	Pheidole	spinosa	Pheidole.MG150	2w., 1s.	pin	Malagasy ant team	2004-04-17	Toamasina	Madagascar	10 m	-17.2833	49.4167	Malagasy	CASC, San Francisco, CA, USA	CASC
CASENT0048919	BLF09555	Pheidole	spinosa	Pheidole.MG151	1w.	pin	B.L.Fisher	2003-12-01	Antsiranana	Madagascar	375 m	-13.255	49.6167	Malagasy	CASC, San Francisco, CA, USA	CASC
CASENT0049242	BLF09871	Pheidole	spinosa	Pheidole.MG145	1w.	pin	B.L.Fisher	2003-12-07	Antsiranana	Madagascar	150 m	-13.1667	49.71	Malagasy	CASC, San Francisco, CA, USA	CASC
CASENT0049255	BLF08723	Pheidole	spinosa	Pheidole.MG154	1w.	pin	B.L.Fisher et al.	2003-11-12	Antsiranana	Madagascar	450 m	-14.4367	49.775	Malagasy	CASC, San Francisco, CA, USA	CASC
CASENT0049277	BLF09428	Pheidole	spinosa	Pheidole.MG150	1w.	pin	B.L.Fisher	2003-11-27	Antsiranana	Madagascar	30 m	-13.0833	49.9083	Malagasy	CASC, San Francisco, CA, USA	CASC
CASENT0049327	BLF06511	Pheidole	spinosa	Pheidole.MG151	1w.	pin	Fisher, Griswold et al.	2002-11-08	Mahajanga	Madagascar	100 m	-16.3767	45.3267	Malagasy	CASC, San Francisco, CA, USA	CASC
CASENT0049343	BLF07302	Pheidole	spinosa	Pheidole.MG147	1w.	pin	Fisher, Griswold et al.	2003-01-27	Fianarantsoa	Madagascar	725 m	-22.4817	45.4617	Malagasy	CASC, San Francisco, CA, USA	CASC
CASENT0049454	BLF07505	Pheidole	spinosa	Pheidole.MG145	1w.	pin	Fisher, Griswold et al.	2003-02-05	Toliara	Madagascar	770 m	-22.8433	44.71	Malagasy	CASC, San Francisco, CA, USA	CASC
CASENT0049457	BLF07505	Pheidole	spinosa	Pheidole.MGs122	1s.	pin	Fisher, Griswold et al.	2003-02-05	Toliara	Madagascar	770 m	-22.8433	44.71	Malagasy	CASC, San Francisco, CA, USA	CASC
CASENT0049518	BLF09874	Pheidole	spinosa	Pheidole.MG145	1w.	pin	B.L.Fisher	2003-12-07	Antsiranana	Madagascar	150 m	-13.1667	49.71	Malagasy	CASC, San Francisco, CA, USA	CASC
CASENT0049584	BLF06586	Pheidole	spinosa	Pheidole.MG151	1w.	pin	Fisher, Griswold et al.	2002-11-12	Mahajanga	Madagascar	100 m	-16.4067	45.31	Malagasy	CASC, San Francisco, CA, USA	CASC
CASENT0049630	BLF06505	Pheidole	spinosa	Pheidole.MG010	1w.	pin	Fisher, Griswold et al.	2002-11-04	Mahajanga	Madagascar	140 m	-16.4667	45.35	Malagasy	CASC, San Francisco, CA, USA	CASC
CASENT0049680	BLF09557	Pheidole	spinosa	Pheidole.MGs128	1s.	pin	B.L.Fisher	2003-12-01	Antsiranana	Madagascar	375 m	-13.255	49.6167	Malagasy	CASC, San Francisco, CA, USA	CASC
CASENT0049681	BLF09557	Pheidole	spinosa	Pheidole.MG155	1w.	pin	B.L.Fisher	2003-12-01	Antsiranana	Madagascar	375 m	-13.255	49.6167	Malagasy	CASC, San Francisco, CA, USA	CASC
CASENT0049696	BLF07383	Pheidole	spinosa	Pheidole.MGs122	1s.	pin	Fisher, Griswold et al.	2003-02-01	Fianarantsoa	Madagascar	700 m	-22.5917	45.1283	Malagasy	CASC, San Francisco, CA, USA	CASC
CASENT0049703	BLF06445	Pheidole	spinosa	Pheidole.MG148	1w.	pin	Fisher, Griswold et al.	2002-11-04	Mahajanga	Madagascar	140 m	-16.4667	45.35	Malagasy	CASC, San Francisco, CA, USA	CASC
CASENT0049719	BLF07303	Pheidole	spinosa	Pheidole.MG147	1w.	pin	Fisher, Griswold et al.	2003-01-27	Fianarantsoa	Madagascar	725 m	-22.4817	45.4617	Malagasy	CASC, San Francisco, CA, USA	CASC
CASENT0049722	BLF07303	Pheidole	spinosa	Pheidole.MGs122	1s.	pin	Fisher, Griswold et al.	2003-01-27	Fianarantsoa	Madagascar	725 m	-22.4817	45.4617	Malagasy	CASC, San Francisco, CA, USA	CASC
CASENT0049743	BLF07653	Pheidole	spinosa	Pheidole.MG154	1w.	pin	Fisher, Griswold et al.	2003-02-10	Fianarantsoa	Madagascar	500 m	-22.3133	45.2917	Malagasy	CASC, San Francisco, CA, USA	CASC
CASENT0049787	BLF07506	Pheidole	spinosa	Pheidole.MG154	1w.	pin	Fisher, Griswold et al.	2003-02-05	Toliara	Madagascar	770 m	-22.8433	44.71	Malagasy	CASC, San Francisco, CA, USA	CASC
CASENT0049812	BLF08253	Pheidole	spinosa	Pheidole.MG155	1w.	pin	Fisher, Griswold et al.	2003-03-17	Toamasina	Madagascar	600 m	-15.2883	49.5483	Malagasy	CASC, San Francisco, CA, USA	CASC
CASENT0049836	BLF07023	Pheidole	spinosa	Pheidole.MG154	1w.	pin	Fisher, Griswold et al.	2003-01-13	Toliara	Madagascar	1050 m	-18.2667	45.4067	Malagasy	CASC, San Francisco, CA, USA	CASC
CASENT0049915	BLF07919	Pheidole	spinosa	Pheidole.MG154	1w.	pin	Fisher, Griswold et al.	2003-02-22	Toliara	Madagascar	1300 m	-22.6433	44.1717	Malagasy	CASC, San Francisco, CA, USA	CASC
CASENT0049931	BLF06811	Pheidole	spinosa	Pheidole.MG154	1w.	pin	Fisher, Griswold et al.	2002-11-26	Mahajanga	Madagascar	10 m	-16.01	45.265	Malagasy	CASC, San Francisco, CA, USA	CASC
CASENT0049965	BLF06581	Pheidole	spinosa	Pheidole.MG150	1w.	pin	Fisher, Griswold et al.	2002-11-12	Mahajanga	Madagascar	100 m	-16.4067	45.31	Malagasy	CASC, San Francisco, CA, USA	CASC
CASENT0050027	BLF07150	Pheidole	spinosa	Pheidole.MG158	1s.	pin	Fisher, Griswold et al.	2003-01-22	Fianarantsoa	Madagascar	1550 m	-20.5933	46.5633	Malagasy	CASC, San Francisco, CA, USA	CASC
CASENT0050058	BLF07018	Pheidole	spinosa	Pheidole.MG154	1w.	pin	Fisher, Griswold et al.	2003-01-13	Toliara	Madagascar	1050 m	-18.2667	45.4067	Malagasy	CASC, San Francisco, CA, USA	CASC
CASENT0050063	BLF07018	Pheidole	spinosa	Pheidole.MGs128	1s.	pin	Fisher, Griswold et al.	2003-01-13	Toliara	Madagascar	1050 m	-18.2667	45.4067	Malagasy	CASC, San Francisco, CA, USA	CASC
CASENT0050086	BLF07381	Pheidole	spinosa	Pheidole.MGs122	1s.	pin	Fisher, Griswold et al.	2003-02-01	Fianarantsoa	Madagascar	700 m	-22.5917	45.1283	Malagasy	CASC, San Francisco, CA, USA	CASC
CASENT0050107	BLF07507	Pheidole	spinosa	Pheidole.MG148	1w.	pin	Fisher, Griswold et al.	2003-02-05	Toliara	Madagascar	770 m	-22.8433	44.71	Malagasy	CASC, San Francisco, CA, USA	CASC
CASENT0050113	BLF07507	Pheidole	spinosa	Pheidole.MGs122	1s.	pin	Fisher, Griswold et al.	2003-02-05	Toliara	Madagascar	770 m	-22.8433	44.71	Malagasy	CASC, San Francisco, CA, USA	CASC
CASENT0050136	BLF06444	Pheidole	spinosa	Pheidole.MGs123	1s.	pin	Fisher, Griswold et al.	2002-11-04	Mahajanga	Madagascar	140 m	-16.4667	45.35	Malagasy	CASC, San Francisco, CA, USA	CASC
CASENT0050137	BLF06444	Pheidole	spinosa	Pheidole.MG155	1w.	pin	Fisher, Griswold et al.	2002-11-04	Mahajanga	Madagascar	140 m	-16.4667	45.35	Malagasy	CASC, San Francisco, CA, USA	CASC
CASENT0050144	BLF07818	Pheidole	spinosa	Pheidole.MGs123	1s.	pin	Fisher, Griswold et al.	2003-02-18	Toliara	Madagascar	1100 m	-22.675	44.19	Malagasy	CASC, San Francisco, CA, USA	CASC
CASENT0050152	BLF07818	Pheidole	spinosa	Pheidole.MG154	1w.	pin	Fisher, Griswold et al.	2003-02-18	Toliara	Madagascar	1100 m	-22.675	44.19	Malagasy	CASC, San Francisco, CA, USA	CASC
CASENT0050220	BLF06693	Pheidole	spinosa	Pheidole.MG151	1w.	pin	Fisher, Griswold et al.	2002-11-19	Mahajanga	Madagascar	30 m	-16.925	44.3683	Malagasy	CASC, San Francisco, CA, USA	CASC
CASENT0050221	BLF06693	Pheidole	spinosa	Pheidole.MG154	1w.	pin	Fisher, Griswold et al.	2002-11-19	Mahajanga	Madagascar	30 m	-16.925	44.3683	Malagasy	CASC, San Francisco, CA, USA	CASC
CASENT0050222	BLF06693	Pheidole	spinosa	Pheidole.MGs123	1s.	pin	Fisher, Griswold et al.	2002-11-19	Mahajanga	Madagascar	30 m	-16.925	44.3683	Malagasy	CASC, San Francisco, CA, USA	CASC
CASENT0050272	BLF07387	Pheidole	spinosa	Pheidole.MG154	1w.	pin	Fisher, Griswold et al.	2003-02-01	Fianarantsoa	Madagascar	700 m	-22.5917	45.1283	Malagasy	CASC, San Francisco, CA, USA	CASC
CASENT0050285	BLF07386	Pheidole	spinosa	Pheidole.MG158	1w.	pin	Fisher, Griswold et al.	2003-02-01	Fianarantsoa	Madagascar	700 m	-22.5917	45.1283	Malagasy	CASC, San Francisco, CA, USA	CASC
CASENT0050286	BLF07386	Pheidole	spinosa	Pheidole.MGs123	1s.	pin	Fisher, Griswold et al.	2003-02-01	Fianarantsoa	Madagascar	700 m	-22.5917	45.1283	Malagasy	CASC, San Francisco, CA, USA	CASC
CASENT0050291	BLF07650	Pheidole	spinosa	Pheidole.MG154	1w.	pin	Fisher, Griswold et al.	2003-02-10	Fianarantsoa	Madagascar	500 m	-22.3133	45.2917	Malagasy	CASC, San Francisco, CA, USA	CASC
CASENT0050293	BLF07509	Pheidole	spinosa	Pheidole.MG154	1w.	pin	Fisher, Griswold et al.	2003-02-05	Toliara	Madagascar	770 m	-22.8433	44.71	Malagasy	CASC, San Francisco, CA, USA	CASC
CASENT0050300	BLF06695	Pheidole	spinosa	Pheidole.MG151	1w.	pin	Fisher, Griswold et al.	2002-11-19	Mahajanga	Madagascar	30 m	-16.925	44.3683	Malagasy	CASC, San Francisco, CA, USA	CASC
CASENT0050302	BLF06695	Pheidole	spinosa	Pheidole.MG154	1w.	pin	Fisher, Griswold et al.	2002-11-19	Mahajanga	Madagascar	30 m	-16.925	44.3683	Malagasy	CASC, San Francisco, CA, USA	CASC
CASENT0050318	BLF07514	Pheidole	spinosa	Pheidole.MG155	1w.	pin	Fisher, Griswold et al.	2003-02-05	Toliara	Madagascar	770 m	-22.8433	44.71	Malagasy	CASC, San Francisco, CA, USA	CASC
CASENT0050528	BLF10509	Pheidole	spinosa	Pheidole.MG154	2w., 1s.	pin	Malagasy ant team	2004-03-21	Toamasina	Madagascar	1068 m	-18.8062	48.3371	Malagasy	CASC, San Francisco, CA, USA	CASC
CASENT0051179	BLF10657	Pheidole	spinosa	Pheidole.megacephala spinosa	2w., 1s.	pin	Malagasy ant team	2004-03-28	Toamasina	Madagascar	1070 m	-18.8708	48.3474	Malagasy	CASC, San Francisco, CA, USA	CASC
CASENT0052492	BLF11297	Pheidole	spinosa	Pheidole.MG151	1w., 1s.	pin	B.L.Fisher	2004-12-03	Antsiranana	Madagascar	225 m	-12.8047	49.3738	Malagasy	CASC, San Francisco, CA, USA	CASC
CASENT0052493	BLF11282	Pheidole	spinosa	Pheidole.MG151	1w., 1m.	pin	B.L.Fisher	2004-12-03	Antsiranana	Madagascar	225 m	-12.8047	49.3738	Malagasy	CASC, San Francisco, CA, USA	CASC
CASENT0052494	BLF11282	Pheidole	spinosa	Pheidole.MG151	1w., 1s.	pin	B.L.Fisher	2004-12-03	Antsiranana	Madagascar	225 m	-12.8047	49.3738	Malagasy	CASC, San Francisco, CA, USA	CASC
CASENT0052501	BLF11448	Pheidole	spinosa	Pheidole.MGs123	1w., 1s.	pin	B.L.Fisher	2004-12-06	Antsiranana	Madagascar	60 m	-12.7467	49.4948	Malagasy	CASC, San Francisco, CA, USA	CASC
CASENT0052502	BLF11448	Pheidole	spinosa	Pheidole.MG151	1w., 1m.	pin	B.L.Fisher	2004-12-06	Antsiranana	Madagascar	60 m	-12.7467	49.4948	Malagasy	CASC, San Francisco, CA, USA	CASC
CASENT0052860	BLF11904	Pheidole	spinosa	Pheidole.MG155	1w., 1m.	pin	B.L.Fisher	2004-12-18	Toamasina	Madagascar	1075 m	-18.8508	48.32	Malagasy	CASC, San Francisco, CA, USA	CASC
CASENT0052861	BLF11904	Pheidole	spinosa	Pheidole.MG150	1w., 1s.	pin	B.L.Fisher	2004-12-18	Toamasina	Madagascar	1075 m	-18.8508	48.32	Malagasy	CASC, San Francisco, CA, USA	CASC
CASENT0053160	MA-02-18B-06	Pheidole	spinosa	Pheidole.MG154	1w.	pin	R. Harin'Hala	2001-12-16	Tulear	Madagascar	37 m	-22.9133	43.4822	Malagasy	CASC, San Francisco, CA, USA	CASC
CASENT0053169	MA-02-18B-17	Pheidole	spinosa	Pheidole.MG154	1w.	pin	R. Harin'Hala	2002-03-18	Tulear	Madagascar	37 m	-22.9133	43.4822	Malagasy	CASC, San Francisco, CA, USA	CASC
CASENT0053190	MA-02-18B-27	Pheidole	spinosa	Pheidole.MGs130	1s.	pin	R. Harin'Hala	2002-07-02	Tulear	Madagascar	37 m	-22.9133	43.4822	Malagasy	CASC, San Francisco, CA, USA	CASC
CASENT0053191	MA-02-18B-27	Pheidole	spinosa	Pheidole.MG155	1w.	pin	R. Harin'Hala	2002-07-02	Tulear	Madagascar	37 m	-22.9133	43.4822	Malagasy	CASC, San Francisco, CA, USA	CASC
CASENT0053298	MA-02-18B-31	Pheidole	spinosa	Pheidole.MG154	1w.	pin	R. Harin'Hala	2002-08-19	Tulear	Madagascar	37 m	-22.9133	43.4822	Malagasy	CASC, San Francisco, CA, USA	CASC
CASENT0053314	MA-02-18A-04	Pheidole	spinosa	Pheidole.MG154	1w.	pin	R. Harin'Hala	2001-11-27	Tulear	Madagascar	30 m	-22.9037	43.4755	Malagasy	CASC, San Francisco, CA, USA	CASC
CASENT0053327	MA-02-18A-17	Pheidole	spinosa	Pheidole.MG154	1w.	pin	R. Harin'Hala	2002-03-18	Tulear	Madagascar	30 m	-22.9037	43.4755	Malagasy	CASC, San Francisco, CA, USA	CASC
CASENT0053351	MA-02-18A-25	Pheidole	spinosa	Pheidole.MGs120	1s.	pin	R. Harin'Hala	2002-06-08	Tulear	Madagascar	30 m	-22.9037	43.4755	Malagasy	CASC, San Francisco, CA, USA	CASC
CASENT0053460	MA-02-11B-09	Pheidole	spinosa	Pheidole.MGs122	1s.	pin	R. Harin'Hala	2001-12-29	Fianarantsoa	Madagascar	885 m	-22.6267	45.3582	Malagasy	CASC, San Francisco, CA, USA	CASC
CASENT0053461	MA-02-11B-09	Pheidole	spinosa	Pheidole.MG150	1w.	pin	R. Harin'Hala	2001-12-29	Fianarantsoa	Madagascar	885 m	-22.6267	45.3582	Malagasy	CASC, San Francisco, CA, USA	CASC
CASENT0053488	MA-02-11B-25	Pheidole	spinosa	Pheidole.MG159	1w.	pin	R. Harin'Hala	2002-04-22	Fianarantsoa	Madagascar	885 m	-22.6267	45.3582	Malagasy	CASC, San Francisco, CA, USA	CASC
CASENT0053518	MA-02-11A-47	Pheidole	spinosa	Pheidole.MG147	1w.	pin	R. Harin'Hala	2002-11-22	Fianarantsoa	Madagascar	750 m	-22.6267	45.3582	Malagasy	CASC, San Francisco, CA, USA	CASC
CASENT0053564	MA-02-11B-58	Pheidole	spinosa	Pheidole.MG159	1w.	pin	R. Harin'Hala	2003-03-05	Fianarantsoa	Madagascar	885 m	-22.6267	45.3582	Malagasy	CASC, San Francisco, CA, USA	CASC
CASENT0053649	BLF11892	Pheidole	spinosa	Pheidole.MG155	1w.	pin	B.L.Fisher	2004-12-18	Toamasina	Madagascar	1075 m	-18.8508	48.32	Malagasy	CASC, San Francisco, CA, USA	CASC
CASENT0053837	BLF11363	Pheidole	spinosa	Pheidole.MG151	1w.	pin	B.L.Fisher	2004-12-04	Antsiranana	Madagascar	225 m	-12.8047	49.3738	Malagasy	CASC, San Francisco, CA, USA	CASC
CASENT0053959	BLF11909	Pheidole	spinosa	Pheidole.megacephala spinosa	1w., 1s.	pin	B.L.Fisher	2004-12-18	Toamasina	Madagascar	1075 m	-18.8508	48.32	Malagasy	CASC, San Francisco, CA, USA	CASC
CASENT0053960	BLF11909	Pheidole	spinosa	Pheidole.MG155	1w., 1m.	pin	B.L.Fisher	2004-12-18	Toamasina	Madagascar	1075 m	-18.8508	48.32	Malagasy	CASC, San Francisco, CA, USA	CASC
CASENT0053962	BLF11914	Pheidole	spinosa	Pheidole.MG155	1w., 1s.	pin	B.L.Fisher	2004-12-18	Toamasina	Madagascar	1075 m	-18.8508	48.32	Malagasy	CASC, San Francisco, CA, USA	CASC
CASENT0053963	BLF11914	Pheidole	spinosa	Pheidole.MG147	1w., 1m.	pin	B.L.Fisher	2004-12-18	Toamasina	Madagascar	1075 m	-18.8508	48.32	Malagasy	CASC, San Francisco, CA, USA	CASC
CASENT0053976	BLF11895	Pheidole	spinosa	Pheidole.MG155	1w., 1m.	pin	B.L.Fisher	2004-12-18	Toamasina	Madagascar	1075 m	-18.8508	48.32	Malagasy	CASC, San Francisco, CA, USA	CASC
CASENT0053977	BLF11895	Pheidole	spinosa	Pheidole.MG155	1w., 1s.	pin	B.L.Fisher	2004-12-18	Toamasina	Madagascar	1075 m	-18.8508	48.32	Malagasy	CASC, San Francisco, CA, USA	CASC
CASENT0054313	BLF11400	Pheidole	spinosa	Pheidole.MG154	1w.	pin	B.L.Fisher	2004-12-05	Antsiranana	Madagascar	60 m	-12.7467	49.4948	Malagasy	CASC, San Francisco, CA, USA	CASC
CASENT0054317	BLF11400	Pheidole	spinosa	Pheidole.MG150	1w.	pin	B.L.Fisher	2004-12-05	Antsiranana	Madagascar	60 m	-12.7467	49.4948	Malagasy	CASC, San Francisco, CA, USA	CASC
CASENT0054353	BLF11400	Pheidole	spinosa	Pheidole.MG151	1w.	pin	B.L.Fisher	2004-12-05	Antsiranana	Madagascar	60 m	-12.7467	49.4948	Malagasy	CASC, San Francisco, CA, USA	CASC
CASENT0054356	BLF11400	Pheidole	spinosa	Pheidole.MGs123	1s.	pin	B.L.Fisher	2004-12-05	Antsiranana	Madagascar	60 m	-12.7467	49.4948	Malagasy	CASC, San Francisco, CA, USA	CASC
CASENT0054358	BLF11400	Pheidole	spinosa	Pheidole.MGs122	1s.	pin	B.L.Fisher	2004-12-05	Antsiranana	Madagascar	60 m	-12.7467	49.4948	Malagasy	CASC, San Francisco, CA, USA	CASC
CASENT0054889	BLF10997	Pheidole	spinosa	Pheidole.MG154	1w.	pin	B.L.Fisher	2004-11-26	Antsiranana	Madagascar	240 m	-14.6793	50.1837	Malagasy	CASC, San Francisco, CA, USA	CASC
CASENT0054890	BLF10997	Pheidole	spinosa	Pheidole.MGs122	1s.	pin	B.L.Fisher	2004-11-26	Antsiranana	Madagascar	240 m	-14.6793	50.1837	Malagasy	CASC, San Francisco, CA, USA	CASC
CASENT0054948	BLF10997	Pheidole	spinosa	Pheidole.MG147	1w.	pin	B.L.Fisher	2004-11-26	Antsiranana	Madagascar	240 m	-14.6793	50.1837	Malagasy	CASC, San Francisco, CA, USA	CASC
CASENT0055055	BLF10997	Pheidole	spinosa	Pheidole.MG148	1w.	pin	B.L.Fisher	2004-11-26	Antsiranana	Madagascar	240 m	-14.6793	50.1837	Malagasy	CASC, San Francisco, CA, USA	CASC
CASENT0056087	BLF11100	Pheidole	spinosa	Pheidole.MGs130	1s.	pin	B.L.Fisher	2004-11-29	Antsiranana	Madagascar	10 m	-13.7153	50.1017	Malagasy	CASC, San Francisco, CA, USA	CASC
CASENT0056165	BLF06508	Pheidole	spinosa	Pheidole.MG154	1w.	pin	Fisher, Griswold et al.	2002-11-08	Mahajanga	Madagascar	100 m	-16.3767	45.3267	Malagasy	CASC, San Francisco, CA, USA	CASC
CASENT0056183	BLF07022	Pheidole	spinosa	Pheidole.MG154	1w.	pin	Fisher, Griswold et al.	2003-01-13	Toliara	Madagascar	1050 m	-18.2667	45.4067	Malagasy	CASC, San Francisco, CA, USA	CASC
CASENT0056301	BLF11100	Pheidole	spinosa	Pheidole.MGs128	1s.	pin	B.L.Fisher	2004-11-29	Antsiranana	Madagascar	10 m	-13.7153	50.1017	Malagasy	CASC, San Francisco, CA, USA	CASC
CASENT0056323	BLF11100	Pheidole	spinosa	Pheidole.MG151	1w.	pin	B.L.Fisher	2004-11-29	Antsiranana	Madagascar	10 m	-13.7153	50.1017	Malagasy	CASC, San Francisco, CA, USA	CASC
CASENT0056641	BLF11520	Pheidole	spinosa	Pheidole.MG154	1w.	pin	B.L.Fisher	2004-12-08	Antsiranana	Madagascar	150 m	-13.4645	48.5517	Malagasy	CASC, San Francisco, CA, USA	CASC
CASENT0056650	BLF11100	Pheidole	spinosa	Pheidole.MGs123	1s.	pin	B.L.Fisher	2004-11-29	Antsiranana	Madagascar	10 m	-13.7153	50.1017	Malagasy	CASC, San Francisco, CA, USA	CASC
CASENT0056703	BLF11520	Pheidole	spinosa	Pheidole.MGs128	1s.	pin	B.L.Fisher	2004-12-08	Antsiranana	Madagascar	150 m	-13.4645	48.5517	Malagasy	CASC, San Francisco, CA, USA	CASC
CASENT0056705	BLF11520	Pheidole	spinosa	Pheidole.MG151	1w.	pin	B.L.Fisher	2004-12-08	Antsiranana	Madagascar	150 m	-13.4645	48.5517	Malagasy	CASC, San Francisco, CA, USA	CASC
CASENT0056724	BLF11520	Pheidole	spinosa	Pheidole.MGs121	1s.	pin	B.L.Fisher	2004-12-08	Antsiranana	Madagascar	150 m	-13.4645	48.5517	Malagasy	CASC, San Francisco, CA, USA	CASC
CASENT0056731	BLF11520	Pheidole	spinosa	Pheidole.MG152	1w.	pin	B.L.Fisher	2004-12-08	Antsiranana	Madagascar	150 m	-13.4645	48.5517	Malagasy	CASC, San Francisco, CA, USA	CASC
CASENT0056993	BLF07383	Pheidole	spinosa	Pheidole.MG154	1w.	pin	Fisher, Griswold et al.	2003-02-01	Fianarantsoa	Madagascar	700 m	-22.5917	45.1283	Malagasy	CASC, San Francisco, CA, USA	CASC
CASENT0056996	BLF07819	Pheidole	spinosa	Pheidole.MG148	1w.	pin	Fisher, Griswold et al.	2003-02-18	Toliara	Madagascar	1100 m	-22.675	44.19	Malagasy	CASC, San Francisco, CA, USA	CASC
CASENT0057260	BLF11099	Pheidole	spinosa	Pheidole.MGs124	1s.	pin	B.L.Fisher	2004-11-29	Antsiranana	Madagascar	10 m	-13.7153	50.1017	Malagasy	CASC, San Francisco, CA, USA	CASC
CASENT0059442	BLF11670	Pheidole	spinosa	Pheidole.MG148	1w.	pin	B.L.Fisher	2004-12-13	Mahajanga	Madagascar	250 m	-15.9627	47.4382	Malagasy	CASC, San Francisco, CA, USA	CASC
CASENT0060284	BLF12368	Pheidole	spinosa	Pheidole.megacephala spinosa	2w.	pin	B.L.Fisher et al.	2005-06-06	Fianarantsoa	Madagascar	175 m	-21.4	47.94	Malagasy	CASC, San Francisco, CA, USA	CASC
CASENT0060285	BLF12368	Pheidole	spinosa	Pheidole.megacephala spinosa	1w.	pin	B.L.Fisher et al.	2005-06-06	Fianarantsoa	Madagascar	175 m	-21.4	47.94	Malagasy	CASC, San Francisco, CA, USA	CASC
CASENT0060288	BLF12362	Pheidole	spinosa	Pheidole.megacephala spinosa	2w.	pin	B.L.Fisher et al.	2005-06-06	Fianarantsoa	Madagascar	175 m	-21.4	47.94	Malagasy	CASC, San Francisco, CA, USA	CASC
CASENT0060289	BLF12362	Pheidole	spinosa	Pheidole.megacephala spinosa	1w.	pin	B.L.Fisher et al.	2005-06-06	Fianarantsoa	Madagascar	175 m	-21.4	47.94	Malagasy	CASC, San Francisco, CA, USA	CASC
CASENT0060290	BLF12362	Pheidole	spinosa	Pheidole.MG151	1w.	pin	B.L.Fisher et al.	2005-06-06	Fianarantsoa	Madagascar	175 m	-21.4	47.94	Malagasy	CASC, San Francisco, CA, USA	CASC
CASENT0060299	BLF12398	Pheidole	spinosa	Pheidole.megacephala spinosa	2w.	pin	B.L.Fisher et al.	2005-06-06	Fianarantsoa	Madagascar	175 m	-21.4	47.94	Malagasy	CASC, San Francisco, CA, USA	CASC
CASENT0060316	BLF12381	Pheidole	spinosa	Pheidole.megacephala spinosa	2w.	pin	B.L.Fisher et al.	2005-06-06	Fianarantsoa	Madagascar	175 m	-21.4	47.94	Malagasy	CASC, San Francisco, CA, USA	CASC
CASENT0060317	BLF12381	Pheidole	spinosa	Pheidole.megacephala spinosa	1w.	pin	B.L.Fisher et al.	2005-06-06	Fianarantsoa	Madagascar	175 m	-21.4	47.94	Malagasy	CASC, San Francisco, CA, USA	CASC
CASENT0060478	BLF12338	Pheidole	spinosa	Pheidole.megacephala spinosa	1w.	pin	B.L.Fisher et al.	2005-06-06	Fianarantsoa	Madagascar	175 m	-21.4	47.94	Malagasy	CASC, San Francisco, CA, USA	CASC
CASENT0060479	BLF12338	Pheidole	spinosa	Pheidole.megacephala spinosa	2w.	pin	B.L.Fisher et al.	2005-06-06	Fianarantsoa	Madagascar	175 m	-21.4	47.94	Malagasy	CASC, San Francisco, CA, USA	CASC
CASENT0060801	BLF12257	Pheidole	spinosa	Pheidole.megacephala spinosa	1w., 1s.	pin	B.L.Fisher et al.	2005-06-03	Fianarantsoa	Madagascar	1075 m	-21.5117	47.41	Malagasy	CASC, San Francisco, CA, USA	CASC
CASENT0060804	BLF12249	Pheidole	spinosa	Pheidole.MGs122	1s.	pin	B.L.Fisher et al.	2005-06-03	Fianarantsoa	Madagascar	1075 m	-21.5117	47.41	Malagasy	CASC, San Francisco, CA, USA	CASC
CASENT0060805	BLF12241	Pheidole	spinosa	Pheidole.MG157	1w.	pin	B.L.Fisher et al.	2005-06-03	Fianarantsoa	Madagascar	1075 m	-21.5117	47.41	Malagasy	CASC, San Francisco, CA, USA	CASC
CASENT0060806	BLF12245	Pheidole	spinosa	Pheidole.MG157	1w., 1s.	pin	B.L.Fisher et al.	2005-06-03	Fianarantsoa	Madagascar	1075 m	-21.5117	47.41	Malagasy	CASC, San Francisco, CA, USA	CASC
CASENT0060809	BLF12260	Pheidole	spinosa	Pheidole.MG158	1w.	pin	B.L.Fisher et al.	2005-06-03	Fianarantsoa	Madagascar	1075 m	-21.5117	47.41	Malagasy	CASC, San Francisco, CA, USA	CASC
CASENT0061091	BLF12296	Pheidole	spinosa	Pheidole.MG151	1w.	pin	B.L.Fisher et al.	2005-06-06	Fianarantsoa	Madagascar	175 m	-21.4	47.94	Malagasy	CASC, San Francisco, CA, USA	CASC
CASENT0061142	BLF12296	Pheidole	spinosa	Pheidole.megacephala spinosa	1w.	pin	B.L.Fisher et al.	2005-06-06	Fianarantsoa	Madagascar	175 m	-21.4	47.94	Malagasy	CASC, San Francisco, CA, USA	CASC
CASENT0061332	BLF12296	Pheidole	spinosa	Pheidole.megacephala spinosa	1w.	pin	B.L.Fisher et al.	2005-06-06	Fianarantsoa	Madagascar	175 m	-21.4	47.94	Malagasy	CASC, San Francisco, CA, USA	CASC
CASENT0061420	MG-31-14	Pheidole	spinosa	Pheidole.MG154	1w.	pin	Rin'Ha, Mike	2005-03-04	Antsiranana	Madagascar	487 m	-14.4382	49.774	Malagasy	CASC, San Francisco, CA, USA	CASC
CASENT0062444	MA-02-13B-08	Pheidole	spinosa	Pheidole.MG154	1w.	pin	R. Harin'Hala	2001-12-16	Tulear	Madagascar	825 m	-22.8405	44.7312	Malagasy	CASC, San Francisco, CA, USA	CASC
CASENT0062460	MA-02-13B-12	Pheidole	spinosa	Pheidole.MG154	1w.	pin	R. Harin'Hala	2002-01-12	Tulear	Madagascar	825 m	-22.8405	44.7312	Malagasy	CASC, San Francisco, CA, USA	CASC
CASENT0062467	MA-02-13B-19	Pheidole	spinosa	Pheidole.MG154	1w.	pin	R. Harin'Hala	2002-03-06	Tulear	Madagascar	825 m	-22.8405	44.7312	Malagasy	CASC, San Francisco, CA, USA	CASC
CASENT0062485	MA-02-13B-29	Pheidole	spinosa	Pheidole.MG154	1w.	pin	R. Harin'Hala	2002-05-19	Tulear	Madagascar	825 m	-22.8405	44.7312	Malagasy	CASC, San Francisco, CA, USA	CASC
CASENT0062626	MA-02-13B-35	Pheidole	spinosa	Pheidole.MG148	1w.	pin	R. Harin'Hala	2002-08-25	Tulear	Madagascar	825 m	-22.8405	44.7312	Malagasy	CASC, San Francisco, CA, USA	CASC
CASENT0062627	MA-02-13B-35	Pheidole	spinosa	Pheidole.MG154	1w.	pin	R. Harin'Hala	2002-08-25	Tulear	Madagascar	825 m	-22.8405	44.7312	Malagasy	CASC, San Francisco, CA, USA	CASC
CASENT0062666	MA-02-13B-06	Pheidole	spinosa	Pheidole.MG154	1w.	pin	R. Harin'Hala	2001-12-07	Tulear	Madagascar	825 m	-22.8405	44.7312	Malagasy	CASC, San Francisco, CA, USA	CASC
CASENT0062714	MA-02-13B-01	Pheidole	spinosa	Pheidole.MG154	1w.	pin	R. Harin'Hala	2001-10-15	Tulear	Madagascar	825 m	-22.8405	44.7312	Malagasy	CASC, San Francisco, CA, USA	CASC
CASENT0062715	MA-02-13B-01	Pheidole	spinosa	Pheidole.MG151	1w.	pin	R. Harin'Hala	2001-10-15	Tulear	Madagascar	825 m	-22.8405	44.7312	Malagasy	CASC, San Francisco, CA, USA	CASC
CASENT0062808	MA-02-13B-23	Pheidole	spinosa	Pheidole.MG154	1w.	pin	R. Harin'Hala	2002-04-03	Tulear	Madagascar	825 m	-22.8405	44.7312	Malagasy	CASC, San Francisco, CA, USA	CASC
CASENT0062848	MA-02-13B-04	Pheidole	spinosa	Pheidole.MG154	1w.	pin	R. Harin'Hala	2001-11-26	Tulear	Madagascar	825 m	-22.8405	44.7312	Malagasy	CASC, San Francisco, CA, USA	CASC
CASENT0062851	MA-02-18B-05	Pheidole	spinosa	Pheidole.MG147	1w.	pin	R. Harin'Hala	2001-12-06	Tulear	Madagascar	37 m	-22.9133	43.4822	Malagasy	CASC, San Francisco, CA, USA	CASC
CASENT0062884	MA-02-13B-18	Pheidole	spinosa	Pheidole.MG154	1w.	pin	R. Harin'Hala	2002-02-28	Tulear	Madagascar	825 m	-22.8405	44.7312	Malagasy	CASC, San Francisco, CA, USA	CASC
CASENT0062895	MA-02-13B-28	Pheidole	spinosa	Pheidole.MG154	1w.	pin	R. Harin'Hala	2002-05-09	Tulear	Madagascar	825 m	-22.8405	44.7312	Malagasy	CASC, San Francisco, CA, USA	CASC
CASENT0062931	MA-02-13B-07	Pheidole	spinosa	Pheidole.MG154	1w.	pin	R. Harin'Hala	2001-12-14	Tulear	Madagascar	825 m	-22.8405	44.7312	Malagasy	CASC, San Francisco, CA, USA	CASC
CASENT0062967	MA-02-13B-02	Pheidole	spinosa	Pheidole.MG154	1w.	pin	R. Harin'Hala	2001-11-09	Tulear	Madagascar	825 m	-22.8405	44.7312	Malagasy	CASC, San Francisco, CA, USA	CASC
CASENT0062986	MA-02-13B-09	Pheidole	spinosa	Pheidole.MG154	1w.	pin	R. Harin'Hala	2001-12-22	Tulear	Madagascar	825 m	-22.8405	44.7312	Malagasy	CASC, San Francisco, CA, USA	CASC
CASENT0063002	MA-02-13B-05	Pheidole	spinosa	Pheidole.MG155	1w.	pin	R. Harin'Hala	2001-12-02	Tulear	Madagascar	825 m	-22.8405	44.7312	Malagasy	CASC, San Francisco, CA, USA	CASC
CASENT0063003	MA-02-13B-05	Pheidole	spinosa	Pheidole.MG154	1w.	pin	R. Harin'Hala	2001-12-02	Tulear	Madagascar	825 m	-22.8405	44.7312	Malagasy	CASC, San Francisco, CA, USA	CASC
CASENT0063023	MA-02-13B-17	Pheidole	spinosa	Pheidole.MG154	1w.	pin	R. Harin'Hala	2002-02-21	Tulear	Madagascar	825 m	-22.8405	44.7312	Malagasy	CASC, San Francisco, CA, USA	CASC
CASENT0063051	MA-02-13B-11	Pheidole	spinosa	Pheidole.MG154	1w.	pin	R. Harin'Hala	2002-01-05	Tulear	Madagascar	825 m	-22.8405	44.7312	Malagasy	CASC, San Francisco, CA, USA	CASC
CASENT0063060	MA-02-13B-15	Pheidole	spinosa	Pheidole.MG154	1w.	pin	R. Harin'Hala	2002-02-05	Tulear	Madagascar	825 m	-22.8405	44.7312	Malagasy	CASC, San Francisco, CA, USA	CASC
CASENT0063077	MA-02-13B-20	Pheidole	spinosa	Pheidole.MG154	1w.	pin	R. Harin'Hala	2002-03-13	Tulear	Madagascar	825 m	-22.8405	44.7312	Malagasy	CASC, San Francisco, CA, USA	CASC
CASENT0063089	MA-02-13B-13	Pheidole	spinosa	Pheidole.MG154	1w.	pin	R. Harin'Hala	2002-01-19	Tulear	Madagascar	825 m	-22.8405	44.7312	Malagasy	CASC, San Francisco, CA, USA	CASC
CASENT0063099	MA-02-13B-25	Pheidole	spinosa	Pheidole.MG154	1w.	pin	R. Harin'Hala	2002-04-16	Tulear	Madagascar	825 m	-22.8405	44.7312	Malagasy	CASC, San Francisco, CA, USA	CASC
CASENT0063116	MA-02-13B-34	Pheidole	spinosa	Pheidole.MG154	1w.	pin	R. Harin'Hala	2002-08-14	Tulear	Madagascar	825 m	-22.8405	44.7312	Malagasy	CASC, San Francisco, CA, USA	CASC
CASENT0063138	MA-02-13B-16	Pheidole	spinosa	Pheidole.MG154	1w.	pin	R. Harin'Hala	2002-02-14	Tulear	Madagascar	825 m	-22.8405	44.7312	Malagasy	CASC, San Francisco, CA, USA	CASC
CASENT0063152	MA-02-13B-21	Pheidole	spinosa	Pheidole.MG154	1w.	pin	R. Harin'Hala	2002-03-20	Tulear	Madagascar	825 m	-22.8405	44.7312	Malagasy	CASC, San Francisco, CA, USA	CASC
CASENT0063167	MA-02-13B-24	Pheidole	spinosa	Pheidole.MG154	1w.	pin	R. Harin'Hala	2002-04-11	Tulear	Madagascar	825 m	-22.8405	44.7312	Malagasy	CASC, San Francisco, CA, USA	CASC
CASENT0063194	MA-02-13B-31	Pheidole	spinosa	Pheidole.MG154	1w.	pin	R. Harin'Hala	2002-07-13	Tulear	Madagascar	825 m	-22.8405	44.7312	Malagasy	CASC, San Francisco, CA, USA	CASC
CASENT0063206	MA-02-13B-33	Pheidole	spinosa	Pheidole.MG154	1w.	pin	R. Harin'Hala	2002-08-01	Tulear	Madagascar	825 m	-22.8405	44.7312	Malagasy	CASC, San Francisco, CA, USA	CASC
CASENT0063225	MA-02-13A-08	Pheidole	spinosa	Pheidole.MG154	1w.	pin	R. Harin'Hala	2001-12-16	Tulear	Madagascar	840 m	-22.8865	44.6922	Malagasy	CASC, San Francisco, CA, USA	CASC
CASENT0063234	MA-02-13B-30	Pheidole	spinosa	Pheidole.MG154	1w.	pin	R. Harin'Hala	2002-07-07	Tulear	Madagascar	825 m	-22.8405	44.7312	Malagasy	CASC, San Francisco, CA, USA	CASC
CASENT0063250	MA-02-13A-06	Pheidole	spinosa	Pheidole.MGs122	1s.	pin	R. Harin'Hala	2001-12-07	Tulear	Madagascar	840 m	-22.8865	44.6922	Malagasy	CASC, San Francisco, CA, USA	CASC
CASENT0063251	MA-02-13A-05	Pheidole	spinosa	Pheidole.MG154	1w.	pin	R. Harin'Hala	2001-12-02	Tulear	Madagascar	840 m	-22.8865	44.6922	Malagasy	CASC, San Francisco, CA, USA	CASC
CASENT0063262	MA-02-13A-13	Pheidole	spinosa	Pheidole.MG154	1w.	pin	R. Harin'Hala	2002-01-19	Tulear	Madagascar	840 m	-22.8865	44.6922	Malagasy	CASC, San Francisco, CA, USA	CASC
CASENT0063313	BLF12843	Pheidole	spinosa	Pheidole.MG151	1w., 1s.	pin	B.L.Fisher et al.	2005-11-21	Toamasina	Madagascar	20 m	-16.8243	49.9642	Malagasy	CASC, San Francisco, CA, USA	CASC
CASENT0063335	MA-02-13A-02	Pheidole	spinosa	Pheidole.MG154	1w.	pin	R. Harin'Hala	2001-11-09	Tulear	Madagascar	840 m	-22.8865	44.6922	Malagasy	CASC, San Francisco, CA, USA	CASC
CASENT0063362	MA-02-13A-09	Pheidole	spinosa	Pheidole.MG154	1w.	pin	R. Harin'Hala	2001-12-22	Tulear	Madagascar	840 m	-22.8865	44.6922	Malagasy	CASC, San Francisco, CA, USA	CASC
CASENT0063382	MA-02-13A-10	Pheidole	spinosa	Pheidole.MG154	1w.	pin	R. Harin'Hala	2001-12-29	Tulear	Madagascar	840 m	-22.8865	44.6922	Malagasy	CASC, San Francisco, CA, USA	CASC
CASENT0063417	MA-02-13B-22	Pheidole	spinosa	Pheidole.MG154	1w.	pin	R. Harin'Hala	2002-03-27	Tulear	Madagascar	825 m	-22.8405	44.7312	Malagasy	CASC, San Francisco, CA, USA	CASC
CASENT0063418	MA-02-13B-22	Pheidole	spinosa	Pheidole.MG151	1w.	pin	R. Harin'Hala	2002-03-27	Tulear	Madagascar	825 m	-22.8405	44.7312	Malagasy	CASC, San Francisco, CA, USA	CASC
CASENT0063427	MA-02-13A-12	Pheidole	spinosa	Pheidole.MG154	1w.	pin	R. Harin'Hala	2002-01-12	Tulear	Madagascar	840 m	-22.8865	44.6922	Malagasy	CASC, San Francisco, CA, USA	CASC
CASENT0063436	MA-02-13A-14	Pheidole	spinosa	Pheidole.MG154	1w.	pin	R. Harin'Hala	2002-01-26	Tulear	Madagascar	840 m	-22.8865	44.6922	Malagasy	CASC, San Francisco, CA, USA	CASC
CASENT0063446	MA-02-18A-11	Pheidole	spinosa	Pheidole.MG154	1w.	pin	R. Harin'Hala	2002-01-17	Tulear	Madagascar	30 m	-22.9037	43.4755	Malagasy	CASC, San Francisco, CA, USA	CASC
CASENT0063448	MA-02-18A-11	Pheidole	spinosa	Pheidole.MG148	1w.	pin	R. Harin'Hala	2002-01-17	Tulear	Madagascar	30 m	-22.9037	43.4755	Malagasy	CASC, San Francisco, CA, USA	CASC
CASENT0063449	MA-02-18A-11	Pheidole	spinosa	Pheidole.MG155	1w.	pin	R. Harin'Hala	2002-01-17	Tulear	Madagascar	30 m	-22.9037	43.4755	Malagasy	CASC, San Francisco, CA, USA	CASC
CASENT0063483	MA-02-13A-11	Pheidole	spinosa	Pheidole.MG154	1w.	pin	R. Harin'Hala	2002-01-05	Tulear	Madagascar	840 m	-22.8865	44.6922	Malagasy	CASC, San Francisco, CA, USA	CASC
CASENT0063530	MA-02-13A-15	Pheidole	spinosa	Pheidole.MG154	1w.	pin	R. Harin'Hala	2002-02-05	Tulear	Madagascar	840 m	-22.8865	44.6922	Malagasy	CASC, San Francisco, CA, USA	CASC
CASENT0063614	MA-02-13A-16	Pheidole	spinosa	Pheidole.MG154	1w.	pin	R. Harin'Hala	2002-02-14	Tulear	Madagascar	840 m	-22.8865	44.6922	Malagasy	CASC, San Francisco, CA, USA	CASC
CASENT0063714	MG-31-01	Pheidole	spinosa	Pheidole.MG010	1w.	pin	Rin'Ha, Mike	2004-12-09	Antsiranana	Madagascar	487 m	-14.4382	49.774	Malagasy	CASC, San Francisco, CA, USA	CASC
CASENT0063800	MG-31-15	Pheidole	spinosa	Pheidole.MG151	1w.	pin	Rin'Ha, Mike	2005-03-11	Antsiranana	Madagascar	487 m	-14.4382	49.774	Malagasy	CASC, San Francisco, CA, USA	CASC
CASENT0063829	MG-31-03	Pheidole	spinosa	Pheidole.MG154	1w.	pin	Rin'Ha, Mike	2004-12-20	Antsiranana	Madagascar	487 m	-14.4382	49.774	Malagasy	CASC, San Francisco, CA, USA	CASC
CASENT0063908	MG-31-04	Pheidole	spinosa	Pheidole.MG154	1w.	pin	Rin'Ha, Mike	2004-12-25	Antsiranana	Madagascar	487 m	-14.4382	49.774	Malagasy	CASC, San Francisco, CA, USA	CASC
CASENT0063963	MG-31-17	Pheidole	spinosa	Pheidole.MG154	1w.	pin	Rin'Ha, Mike	2005-03-25	Antsiranana	Madagascar	487 m	-14.4382	49.774	Malagasy	CASC, San Francisco, CA, USA	CASC
CASENT0064002	MG-31-12	Pheidole	spinosa	Pheidole.MG010	1w.	pin	Rin'Ha, Mike	2005-02-18	Antsiranana	Madagascar	487 m	-14.4382	49.774	Malagasy	CASC, San Francisco, CA, USA	CASC
CASENT0064058	MG-31-23	Pheidole	spinosa	Pheidole.megacephala spinosa	1w.	pin	Rin'Ha, Mike	2005-05-30	Antsiranana	Madagascar	487 m	-14.4382	49.774	Malagasy	CASC, San Francisco, CA, USA	CASC
CASENT0064059	MG-31-23	Pheidole	spinosa	Pheidole.MGs128	1s.	pin	Rin'Ha, Mike	2005-05-30	Antsiranana	Madagascar	487 m	-14.4382	49.774	Malagasy	CASC, San Francisco, CA, USA	CASC
CASENT0064132	MG-31-06	Pheidole	spinosa	Pheidole.MG010	1w.	pin	Rin'Ha, Mike	2005-01-05	Antsiranana	Madagascar	487 m	-14.4382	49.774	Malagasy	CASC, San Francisco, CA, USA	CASC
CASENT0064364	MA-02-14A-08	Pheidole	spinosa	Pheidole.MG148	1w.	pin	R. Harin'Hala	2001-12-25	Tulear	Madagascar	165 m	-23.6865	44.591	Malagasy	CASC, San Francisco, CA, USA	CASC
CASENT0064455	MG-31-08	Pheidole	spinosa	Pheidole.MGs128	1s.	pin	Rin'Ha, Mike	2005-01-15	Antsiranana	Madagascar	487 m	-14.4382	49.774	Malagasy	CASC, San Francisco, CA, USA	CASC
CASENT0064466	MA-02-11A-20	Pheidole	spinosa	Pheidole.MG159	1w.	pin	R. Harin'Hala	2002-03-17	Fianarantsoa	Madagascar	750 m	-22.6267	45.3582	Malagasy	CASC, San Francisco, CA, USA	CASC
CASENT0064543	MG-31-07	Pheidole	spinosa	Pheidole.MG010	1w.	pin	Rin'Ha, Mike	2005-01-10	Antsiranana	Madagascar	487 m	-14.4382	49.774	Malagasy	CASC, San Francisco, CA, USA	CASC
CASENT0064545	MG-31-07	Pheidole	spinosa	Pheidole.MGs128	1s.	pin	Rin'Ha, Mike	2005-01-10	Antsiranana	Madagascar	487 m	-14.4382	49.774	Malagasy	CASC, San Francisco, CA, USA	CASC
CASENT0064611	MA-02-11A-08	Pheidole	spinosa	Pheidole.MG159	1w.	pin	R. Harin'Hala	2001-12-21	Fianarantsoa	Madagascar	750 m	-22.6267	45.3582	Malagasy	CASC, San Francisco, CA, USA	CASC
CASENT0064712	MA-02-11A-17	Pheidole	spinosa	Pheidole.MG155	1w.	pin	R. Harin'Hala	2002-02-24	Fianarantsoa	Madagascar	750 m	-22.6267	45.3582	Malagasy	CASC, San Francisco, CA, USA	CASC
CASENT0064872	MA-02-11A-18	Pheidole	spinosa	Pheidole.MG159	1w.	pin	R. Harin'Hala	2002-03-03	Fianarantsoa	Madagascar	750 m	-22.6267	45.3582	Malagasy	CASC, San Francisco, CA, USA	CASC
CASENT0064903	MA-02-11A-16	Pheidole	spinosa	Pheidole.MGs128	1s.	pin	R. Harin'Hala	2002-02-17	Fianarantsoa	Madagascar	750 m	-22.6267	45.3582	Malagasy	CASC, San Francisco, CA, USA	CASC
CASENT0064904	MA-02-11A-16	Pheidole	spinosa	Pheidole.MG159	1w.	pin	R. Harin'Hala	2002-02-17	Fianarantsoa	Madagascar	750 m	-22.6267	45.3582	Malagasy	CASC, San Francisco, CA, USA	CASC
CASENT0065060	BLF12605	Pheidole	spinosa	Pheidole.MG150	1w., 1s.	pin	B.L.Fisher et al.	2005-11-15	Toamasina	Madagascar	225 m	-16.455	49.7875	Malagasy	CASC, San Francisco, CA, USA	CASC
CASENT0065101	MG-31-05	Pheidole	spinosa	Pheidole.MG154	1w.	pin	Rin'Ha, Mike	2004-12-30	Antsiranana	Madagascar	487 m	-14.4382	49.774	Malagasy	CASC, San Francisco, CA, USA	CASC
CASENT0065105	MG-31-05	Pheidole	spinosa	Pheidole.MGs123	1s.	pin	Rin'Ha, Mike	2004-12-30	Antsiranana	Madagascar	487 m	-14.4382	49.774	Malagasy	CASC, San Francisco, CA, USA	CASC
CASENT0065138	MA-02-11A-06	Pheidole	spinosa	Pheidole.MG155	1w.	pin	R. Harin'Hala	2001-12-07	Fianarantsoa	Madagascar	750 m	-22.6267	45.3582	Malagasy	CASC, San Francisco, CA, USA	CASC
CASENT0065152	MA-02-11A-07	Pheidole	spinosa	Pheidole.MG159	1w.	pin	R. Harin'Hala	2001-12-16	Fianarantsoa	Madagascar	750 m	-22.6267	45.3582	Malagasy	CASC, San Francisco, CA, USA	CASC
CASENT0065252	MA-02-11A-02	Pheidole	spinosa	Pheidole.MG159	1w.	pin	R. Harin'Hala	2001-11-09	Fianarantsoa	Madagascar	750 m	-22.6267	45.3582	Malagasy	CASC, San Francisco, CA, USA	CASC
CASENT0065538	MA-02-13A-07	Pheidole	spinosa	Pheidole.MG154	1w.	pin	R. Harin'Hala	2001-12-14	Tulear	Madagascar	840 m	-22.8865	44.6922	Malagasy	CASC, San Francisco, CA, USA	CASC
CASENT0065558	BLF12920	Pheidole	spinosa	Pheidole.MG151	1w., 1s.	pin	B.L.Fisher et al.	2005-11-22	Toamasina	Madagascar	20 m	-16.8243	49.9642	Malagasy	CASC, San Francisco, CA, USA	CASC
CASENT0065564	BLF12865	Pheidole	spinosa	Pheidole.megacephala spinosa	1w., 1s.	pin	B.L.Fisher et al.	2005-11-21	Toamasina	Madagascar	20 m	-16.8243	49.9642	Malagasy	CASC, San Francisco, CA, USA	CASC
CASENT0065621	MA-02-14A-09	Pheidole	spinosa	Pheidole.MG148	1w.	pin	R. Harin'Hala	2002-01-02	Tulear	Madagascar	165 m	-23.6865	44.591	Malagasy	CASC, San Francisco, CA, USA	CASC
CASENT0065763	MA-02-14A-02	Pheidole	spinosa	Pheidole.MG151	1w.	pin	R. Harin'Hala	2001-11-10	Tulear	Madagascar	165 m	-23.6865	44.591	Malagasy	CASC, San Francisco, CA, USA	CASC
CASENT0065764	MA-02-14A-02	Pheidole	spinosa	Pheidole.MG155	1w.	pin	R. Harin'Hala	2001-11-10	Tulear	Madagascar	165 m	-23.6865	44.591	Malagasy	CASC, San Francisco, CA, USA	CASC
CASENT0065848	MA-02-14A-03	Pheidole	spinosa	Pheidole.MG150	1w.	pin	R. Harin'Hala	2001-11-21	Tulear	Madagascar	165 m	-23.6865	44.591	Malagasy	CASC, San Francisco, CA, USA	CASC
CASENT0065850	MA-02-14A-03	Pheidole	spinosa	Pheidole.MG148	1w.	pin	R. Harin'Hala	2001-11-21	Tulear	Madagascar	165 m	-23.6865	44.591	Malagasy	CASC, San Francisco, CA, USA	CASC
CASENT0065927	MA-02-14A-04	Pheidole	spinosa	Pheidole.MG154	1w.	pin	R. Harin'Hala	2001-11-28	Tulear	Madagascar	165 m	-23.6865	44.591	Malagasy	CASC, San Francisco, CA, USA	CASC
CASENT0065953	MA-02-14A-07	Pheidole	spinosa	Pheidole.MG154	1w.	pin	R. Harin'Hala	2001-12-18	Tulear	Madagascar	165 m	-23.6865	44.591	Malagasy	CASC, San Francisco, CA, USA	CASC
CASENT0065993	MA-02-14A-01	Pheidole	spinosa	Pheidole.MGs122	1s.	pin	R. Harin'Hala	2001-10-15	Tulear	Madagascar	165 m	-23.6865	44.591	Malagasy	CASC, San Francisco, CA, USA	CASC
CASENT0065996	MA-02-14A-01	Pheidole	spinosa	Pheidole.MG154	1w.	pin	R. Harin'Hala	2001-10-15	Tulear	Madagascar	165 m	-23.6865	44.591	Malagasy	CASC, San Francisco, CA, USA	CASC
CASENT0066038	MA-02-14A-06	Pheidole	spinosa	Pheidole.MG154	1w.	pin	R. Harin'Hala	2001-12-11	Tulear	Madagascar	165 m	-23.6865	44.591	Malagasy	CASC, San Francisco, CA, USA	CASC
CASENT0066057	MA-02-14A-11	Pheidole	spinosa	Pheidole.MG154	1w.	pin	R. Harin'Hala	2002-01-16	Tulear	Madagascar	165 m	-23.6865	44.591	Malagasy	CASC, San Francisco, CA, USA	CASC
CASENT0066059	MA-02-14A-11	Pheidole	spinosa	Pheidole.MGs128	1s.	pin	R. Harin'Hala	2002-01-16	Tulear	Madagascar	165 m	-23.6865	44.591	Malagasy	CASC, San Francisco, CA, USA	CASC
CASENT0066135	MA-02-18A-12	Pheidole	spinosa	Pheidole.MG154	1w.	pin	R. Harin'Hala	2002-01-28	Tulear	Madagascar	30 m	-22.9037	43.4755	Malagasy	CASC, San Francisco, CA, USA	CASC
CASENT0066144	MA-02-18A-13	Pheidole	spinosa	Pheidole.MGs120	1s.	pin	R. Harin'Hala	2002-02-08	Tulear	Madagascar	30 m	-22.9037	43.4755	Malagasy	CASC, San Francisco, CA, USA	CASC
CASENT0066145	MA-02-18A-13	Pheidole	spinosa	Pheidole.MG158	1w.	pin	R. Harin'Hala	2002-02-08	Tulear	Madagascar	30 m	-22.9037	43.4755	Malagasy	CASC, San Francisco, CA, USA	CASC
CASENT0066150	MA-02-18A-14	Pheidole	spinosa	Pheidole.MGs120	1s.	pin	R. Harin'Hala	2002-02-19	Tulear	Madagascar	30 m	-22.9037	43.4755	Malagasy	CASC, San Francisco, CA, USA	CASC
CASENT0066152	MA-02-18A-14	Pheidole	spinosa	Pheidole.MG154	1w.	pin	R. Harin'Hala	2002-02-19	Tulear	Madagascar	30 m	-22.9037	43.4755	Malagasy	CASC, San Francisco, CA, USA	CASC
CASENT0066167	MA-02-18A-15	Pheidole	spinosa	Pheidole.MG154	1w.	pin	R. Harin'Hala	2002-03-01	Tulear	Madagascar	30 m	-22.9037	43.4755	Malagasy	CASC, San Francisco, CA, USA	CASC
CASENT0066178	MA-02-18A-16	Pheidole	spinosa	Pheidole.MG154	1w.	pin	R. Harin'Hala	2002-03-08	Tulear	Madagascar	30 m	-22.9037	43.4755	Malagasy	CASC, San Francisco, CA, USA	CASC
CASENT0066191	MA-02-18A-18	Pheidole	spinosa	Pheidole.MG154	1w.	pin	R. Harin'Hala	2002-03-28	Tulear	Madagascar	30 m	-22.9037	43.4755	Malagasy	CASC, San Francisco, CA, USA	CASC
CASENT0066202	MA-02-18A-19	Pheidole	spinosa	Pheidole.MG154	1w.	pin	R. Harin'Hala	2002-04-08	Tulear	Madagascar	30 m	-22.9037	43.4755	Malagasy	CASC, San Francisco, CA, USA	CASC
CASENT0066212	MA-02-18A-20	Pheidole	spinosa	Pheidole.MG154	1w.	pin	R. Harin'Hala	2002-04-18	Tulear	Madagascar	30 m	-22.9037	43.4755	Malagasy	CASC, San Francisco, CA, USA	CASC
CASENT0066221	MA-02-18A-21	Pheidole	spinosa	Pheidole.MG148	1w.	pin	R. Harin'Hala	2002-04-29	Tulear	Madagascar	30 m	-22.9037	43.4755	Malagasy	CASC, San Francisco, CA, USA	CASC
CASENT0066229	MA-02-18A-22	Pheidole	spinosa	Pheidole.MG154	1w.	pin	R. Harin'Hala	2002-05-09	Tulear	Madagascar	30 m	-22.9037	43.4755	Malagasy	CASC, San Francisco, CA, USA	CASC
CASENT0066240	MA-02-18A-23	Pheidole	spinosa	Pheidole.MG154	1w.	pin	R. Harin'Hala	2002-05-19	Tulear	Madagascar	30 m	-22.9037	43.4755	Malagasy	CASC, San Francisco, CA, USA	CASC
CASENT0066251	MA-02-18A-24	Pheidole	spinosa	Pheidole.MG155	1w.	pin	R. Harin'Hala	2002-05-29	Tulear	Madagascar	30 m	-22.9037	43.4755	Malagasy	CASC, San Francisco, CA, USA	CASC
CASENT0066310	MA-02-18B-01	Pheidole	spinosa	Pheidole.MG151	1w.	pin	R. Harin'Hala	2001-10-12	Tulear	Madagascar	37 m	-22.9133	43.4822	Malagasy	CASC, San Francisco, CA, USA	CASC
CASENT0066320	MA-02-18B-02	Pheidole	spinosa	Pheidole.MG150	1w.	pin	R. Harin'Hala	2001-11-12	Tulear	Madagascar	37 m	-22.9133	43.4822	Malagasy	CASC, San Francisco, CA, USA	CASC
CASENT0066335	MA-02-18B-03	Pheidole	spinosa	Pheidole.MG151	1w.	pin	R. Harin'Hala	2001-11-20	Tulear	Madagascar	37 m	-22.9133	43.4822	Malagasy	CASC, San Francisco, CA, USA	CASC
CASENT0066347	MA-02-18B-04	Pheidole	spinosa	Pheidole.MG154	1w.	pin	R. Harin'Hala	2001-11-27	Tulear	Madagascar	37 m	-22.9133	43.4822	Malagasy	CASC, San Francisco, CA, USA	CASC
CASENT0066451	MA-02-18B-06	Pheidole	spinosa	Pheidole.MGs122	1s.	pin	R. Harin'Hala	2001-12-16	Tulear	Madagascar	37 m	-22.9133	43.4822	Malagasy	CASC, San Francisco, CA, USA	CASC
CASENT0066452	MA-02-18B-06	Pheidole	spinosa	Pheidole.MG147	1w.	pin	R. Harin'Hala	2001-12-16	Tulear	Madagascar	37 m	-22.9133	43.4822	Malagasy	CASC, San Francisco, CA, USA	CASC
CASENT0066462	MA-02-18B-08	Pheidole	spinosa	Pheidole.MG154	1w.	pin	R. Harin'Hala	2001-12-27	Tulear	Madagascar	37 m	-22.9133	43.4822	Malagasy	CASC, San Francisco, CA, USA	CASC
CASENT0066468	MA-02-18B-09	Pheidole	spinosa	Pheidole.MG148	1w.	pin	R. Harin'Hala	2002-01-06	Tulear	Madagascar	37 m	-22.9133	43.4822	Malagasy	CASC, San Francisco, CA, USA	CASC
CASENT0066475	MA-02-18B-10	Pheidole	spinosa	Pheidole.MG147	1w.	pin	R. Harin'Hala	2002-01-16	Tulear	Madagascar	37 m	-22.9133	43.4822	Malagasy	CASC, San Francisco, CA, USA	CASC
CASENT0066486	MA-02-18B-11	Pheidole	spinosa	Pheidole.MG154	1w.	pin	R. Harin'Hala	2002-01-17	Tulear	Madagascar	37 m	-22.9133	43.4822	Malagasy	CASC, San Francisco, CA, USA	CASC
CASENT0066778	BLF12863	Pheidole	spinosa	Pheidole.MG150	1w., 1s.	pin	B.L.Fisher et al.	2005-11-21	Toamasina	Madagascar	20 m	-16.8243	49.9642	Malagasy	CASC, San Francisco, CA, USA	CASC
CASENT0066780	BLF12864	Pheidole	spinosa	Pheidole.megacephala spinosa	1w., 1s.	pin	B.L.Fisher et al.	2005-11-21	Toamasina	Madagascar	20 m	-16.8243	49.9642	Malagasy	CASC, San Francisco, CA, USA	CASC
CASENT0066783	BLF12856	Pheidole	spinosa	Pheidole.(indet)	1w., 1s.	pin	B.L.Fisher et al.	2005-11-21	Toamasina	Madagascar	20 m	-16.8243	49.9642	Malagasy	CASC, San Francisco, CA, USA	CASC
CASENT0067158	BLF13000	Pheidole	spinosa	Pheidole.MG150	1w., 1s.	pin	B.L.Fisher et al.	2005-11-24	Toamasina	Madagascar	100 m	-16.9225	49.8873	Malagasy	CASC, San Francisco, CA, USA	CASC
CASENT0067548	BLF12749	Pheidole	spinosa	Pheidole.MG150	1w., 1s.	pin	B.L.Fisher et al.	2005-11-18	Toamasina	Madagascar	125 m	-16.6723	49.7012	Malagasy	CASC, San Francisco, CA, USA	CASC
CASENT0068006	BLF12819	Pheidole	spinosa	Pheidole.MG150	1w., 1s.	pin	B.L.Fisher et al.	2005-11-19	Toamasina	Madagascar	125 m	-16.6723	49.7012	Malagasy	CASC, San Francisco, CA, USA	CASC
CASENT0068575	BLF12706	Pheidole	spinosa	Pheidole.MG151	1w.	pin	B.L.Fisher et al.	2005-11-18	Toamasina	Madagascar	125 m	-16.6723	49.7012	Malagasy	CASC, San Francisco, CA, USA	CASC
CASENT0068776	MA-02-11B-52	Pheidole	spinosa	Pheidole.MG155	1w.	pin	R. Harin'Hala	2003-01-02	Fianarantsoa	Madagascar	885 m	-22.6267	45.3582	Malagasy	CASC, San Francisco, CA, USA	CASC
CASENT0069065	BLF12840	Pheidole	spinosa	Pheidole.MG151	1w.	pin	B.L.Fisher et al.	2005-11-21	Toamasina	Madagascar	20 m	-16.8243	49.9642	Malagasy	CASC, San Francisco, CA, USA	CASC
CASENT0069801	BLF12989	Pheidole	spinosa	Pheidole.megacephala spinosa	1w.	pin	B.L.Fisher et al.	2005-11-24	Toamasina	Madagascar	100 m	-16.9225	49.8873	Malagasy	CASC, San Francisco, CA, USA	CASC
CASENT0069805	BLF12989	Pheidole	spinosa	Pheidole.MGs128	1s.	pin	B.L.Fisher et al.	2005-11-24	Toamasina	Madagascar	100 m	-16.9225	49.8873	Malagasy	CASC, San Francisco, CA, USA	CASC
CASENT0069813	BLF12989	Pheidole	spinosa	Pheidole.MG151	1w.	pin	B.L.Fisher et al.	2005-11-24	Toamasina	Madagascar	100 m	-16.9225	49.8873	Malagasy	CASC, San Francisco, CA, USA	CASC
CASENT0069825	BLF12989	Pheidole	spinosa	Pheidole.MG151	1w.	pin	B.L.Fisher et al.	2005-11-24	Toamasina	Madagascar	100 m	-16.9225	49.8873	Malagasy	CASC, San Francisco, CA, USA	CASC
CASENT0070704	BLF14187	Pheidole	spinosa	Pheidole.MGs128	1w., 1s.	pin	B.L. Fisher et al.	2006-04-24	Fianarantsoa	Madagascar	600 m	-22.791	47.1818	Malagasy	CASC, San Francisco, CA, USA	CASC
CASENT0070822	BLF14263	Pheidole	spinosa	Pheidole.megacephala	1w.	pin	B.L.Fisher et al.	2006-04-24	Fianarantsoa	Madagascar	600 m	-22.791	47.1818	Malagasy	CASC, San Francisco, CA, USA	CASC
CASENT0070840	BLF13891	Pheidole	spinosa	Pheidole.megacephala spinosa	1w., 1s.	pin	B.L. Fisher et al.	2006-04-19	Fianarantsoa	Madagascar	20 m	-23.1938	47.723	Malagasy	CASC, San Francisco, CA, USA	CASC
CASENT0070850	BLF13863	Pheidole	spinosa	Pheidole.MG150	1w., 1s.	pin	B.L. Fisher et al.	2006-04-19	Fianarantsoa	Madagascar	20 m	-23.1938	47.723	Malagasy	CASC, San Francisco, CA, USA	CASC
CASENT0070852	BLF13845	Pheidole	spinosa	Pheidole.MG157	1w., 1s.	pin	B.L. Fisher et al.	2006-04-19	Fianarantsoa	Madagascar	20 m	-23.1938	47.723	Malagasy	CASC, San Francisco, CA, USA	CASC
CASENT0070853	BLF13885	Pheidole	spinosa	Pheidole.MG150	1w., 1s.	pin	B.L. Fisher et al.	2006-04-19	Fianarantsoa	Madagascar	20 m	-23.1938	47.723	Malagasy	CASC, San Francisco, CA, USA	CASC
CASENT0070918	BLF13831	Pheidole	spinosa	Pheidole.MGs122	1w., 1s.	pin	B.L. Fisher et al.	2006-04-19	Fianarantsoa	Madagascar	20 m	-23.1938	47.723	Malagasy	CASC, San Francisco, CA, USA	CASC
CASENT0070950	BLF13844	Pheidole	spinosa	Pheidole.MG150	1w., 1s.	pin	B.L. Fisher et al.	2006-04-19	Fianarantsoa	Madagascar	20 m	-23.1938	47.723	Malagasy	CASC, San Francisco, CA, USA	CASC
CASENT0070966	BLF13853	Pheidole	spinosa	Pheidole.MG150	1w., 1s.	pin	B.L. Fisher et al.	2006-04-19	Fianarantsoa	Madagascar	20 m	-23.1938	47.723	Malagasy	CASC, San Francisco, CA, USA	CASC
CASENT0070970	BLF13870	Pheidole	spinosa	Pheidole.MG154	1w., 1s.	pin	B.L. Fisher et al.	2006-04-19	Fianarantsoa	Madagascar	20 m	-23.1938	47.723	Malagasy	CASC, San Francisco, CA, USA	CASC
CASENT0070985	BLF13920	Pheidole	spinosa	Pheidole.MG151	1w.	pin	B.L. Fisher et al.	2006-04-19	Fianarantsoa	Madagascar	20 m	-23.1938	47.723	Malagasy	CASC, San Francisco, CA, USA	CASC
CASENT0071161	BLF14265	Pheidole	spinosa	Pheidole.megacephala	1w.	pin	B.L.Fisher et al.	2006-04-24	Fianarantsoa	Madagascar	600 m	-22.791	47.1818	Malagasy	CASC, San Francisco, CA, USA	CASC
CASENT0071209	BLF13867	Pheidole	spinosa	Pheidole.MG151	1w.	pin	B.L. Fisher et al.	2006-04-19	Fianarantsoa	Madagascar	20 m	-23.1938	47.723	Malagasy	CASC, San Francisco, CA, USA	CASC
CASENT0071322	BLF12705	Pheidole	spinosa	Pheidole.MG151	1w.	pin	B.L.Fisher et al.	2005-11-16	Toamasina	Madagascar	225 m	-16.455	49.7875	Malagasy	CASC, San Francisco, CA, USA	CASC
CASENT0071381	BLF13766	Pheidole	spinosa	Pheidole.megacephala spinosa	1w., 1s.	pin	B.L. Fisher et al.	2006-04-16	Fianarantsoa	Madagascar	2150 m	-22.1877	46.9008	Malagasy	CASC, San Francisco, CA, USA	CASC
CASENT0071383	BLF13761	Pheidole	spinosa	Pheidole.MG157	1w., 1s.	pin	B.L. Fisher et al.	2006-04-16	Fianarantsoa	Madagascar	2150 m	-22.1877	46.9008	Malagasy	CASC, San Francisco, CA, USA	CASC
CASENT0071386	BLF13759	Pheidole	spinosa	Pheidole.MG157	1w., 1s.	pin	B.L. Fisher et al.	2006-04-15	Fianarantsoa	Madagascar	2000 m	-22.1523	46.8992	Malagasy	CASC, San Francisco, CA, USA	CASC
CASENT0071394	BLF13780	Pheidole	spinosa	Pheidole.MG158	1w.	pin	B.L. Fisher et al.	2006-04-16	Fianarantsoa	Madagascar	2150 m	-22.1877	46.9008	Malagasy	CASC, San Francisco, CA, USA	CASC
CASENT0071418	BLF13812	Pheidole	spinosa	Pheidole.MG157	1w., 1s.	pin	B.L. Fisher et al.	2006-04-16	Fianarantsoa	Madagascar	2150 m	-22.1877	46.9008	Malagasy	CASC, San Francisco, CA, USA	CASC
CASENT0071432	BLF13789	Pheidole	spinosa	Pheidole.MG157	1w., 1s.	pin	B.L. Fisher et al.	2006-04-16	Fianarantsoa	Madagascar	2150 m	-22.1877	46.9008	Malagasy	CASC, San Francisco, CA, USA	CASC
CASENT0071433	BLF13787	Pheidole	spinosa	Pheidole.MG157	1w., 1s.	pin	B.L. Fisher et al.	2006-04-16	Fianarantsoa	Madagascar	2150 m	-22.1877	46.9008	Malagasy	CASC, San Francisco, CA, USA	CASC
CASENT0071438	BLF13778	Pheidole	spinosa	Pheidole.MG157	1w., 1s.	pin	B.L. Fisher et al.	2006-04-16	Fianarantsoa	Madagascar	2150 m	-22.1877	46.9008	Malagasy	CASC, San Francisco, CA, USA	CASC
CASENT0071441	BLF13770	Pheidole	spinosa	Pheidole.MG148	1w.	pin	B.L. Fisher et al.	2006-04-16	Fianarantsoa	Madagascar	2150 m	-22.1877	46.9008	Malagasy	CASC, San Francisco, CA, USA	CASC
CASENT0071443	BLF13793	Pheidole	spinosa	Pheidole.MG157	1w., 1s.	pin	B.L. Fisher et al.	2006-04-16	Fianarantsoa	Madagascar	2150 m	-22.1877	46.9008	Malagasy	CASC, San Francisco, CA, USA	CASC
CASENT0071457	BLF13743	Pheidole	spinosa	Pheidole.megacephala spinosa	1w., 1s.	pin	B.L. Fisher et al.	2006-04-14	Fianarantsoa	Madagascar	950 m	-22.0848	46.7763	Malagasy	CASC, San Francisco, CA, USA	CASC
CASENT0071458	BLF13745	Pheidole	spinosa	Pheidole.MGs128	1w., 1s.	pin	B.L. Fisher et al.	2006-04-14	Fianarantsoa	Madagascar	950 m	-22.0848	46.7763	Malagasy	CASC, San Francisco, CA, USA	CASC
CASENT0071460	BLF13753	Pheidole	spinosa	Pheidole.MG147	1w.	pin	B.L. Fisher et al.	2006-04-14	Fianarantsoa	Madagascar	975 m	-22.0832	46.774	Malagasy	CASC, San Francisco, CA, USA	CASC
CASENT0071470	BLF13707	Pheidole	spinosa	Pheidole.megacephala	1w., 1s.	pin	B.L. Fisher et al.	2006-04-14	Fianarantsoa	Madagascar	975 m	-22.0832	46.774	Malagasy	CASC, San Francisco, CA, USA	CASC
CASENT0071506	BLF13734	Pheidole	spinosa	Pheidole.MGs123	1w., 1s.	pin	B.L. Fisher et al.	2006-04-14	Fianarantsoa	Madagascar	950 m	-22.0848	46.7763	Malagasy	CASC, San Francisco, CA, USA	CASC
CASENT0071552	BLF13754	Pheidole	spinosa	Pheidole.megacephala spinosa	1w., 1s.	pin	B.L. Fisher et al.	2006-04-14	Fianarantsoa	Madagascar	975 m	-22.0832	46.774	Malagasy	CASC, San Francisco, CA, USA	CASC
CASENT0071554	BLF13752	Pheidole	spinosa	Pheidole.megacephala spinosa	1w.	pin	B.L. Fisher et al.	2006-04-14	Fianarantsoa	Madagascar	975 m	-22.0832	46.774	Malagasy	CASC, San Francisco, CA, USA	CASC
CASENT0071624	BLF14034	Pheidole	spinosa	Pheidole.MG150	1w., 1s.	pin	B.L. Fisher et al.	2006-04-21	Fianarantsoa	Madagascar	30 m	-23.0158	47.719	Malagasy	CASC, San Francisco, CA, USA	CASC
CASENT0071635	BLF13989	Pheidole	spinosa	Pheidole.MG150	1w., 1s.	pin	B.L. Fisher et al.	2006-04-21	Fianarantsoa	Madagascar	30 m	-23.0158	47.719	Malagasy	CASC, San Francisco, CA, USA	CASC
CASENT0072082	BLF13963	Pheidole	spinosa	Pheidole.megacephala	1w.	pin	B.L. Fisher et al.	2006-04-20	Fianarantsoa	Madagascar	30 m	-23.0158	47.719	Malagasy	CASC, San Francisco, CA, USA	CASC
CASENT0072096	BLF13963	Pheidole	spinosa	Pheidole.MG151	1w.	pin	B.L. Fisher et al.	2006-04-20	Fianarantsoa	Madagascar	30 m	-23.0158	47.719	Malagasy	CASC, San Francisco, CA, USA	CASC
CASENT0072314	BLF13756	Pheidole	spinosa	Pheidole.megacephala	1s.	pin	B.L. Fisher et al.	2006-04-15	Fianarantsoa	Madagascar	2000 m	-22.1523	46.8992	Malagasy	CASC, San Francisco, CA, USA	CASC
CASENT0072654	BLF13825	Pheidole	spinosa	Pheidole.MGs128	1s.	pin	B.L. Fisher et al.	2006-04-19	Fianarantsoa	Madagascar	20 m	-23.1938	47.723	Malagasy	CASC, San Francisco, CA, USA	CASC
CASENT0072862	BLF13825	Pheidole	spinosa	Pheidole.megacephala	1w.	pin	B.L. Fisher et al.	2006-04-19	Fianarantsoa	Madagascar	20 m	-23.1938	47.723	Malagasy	CASC, San Francisco, CA, USA	CASC
CASENT0073329	BLF09558	Pheidole	spinosa	Pheidole.MGs122	1s.	pin	B.L.Fisher	2003-12-01	Antsiranana	Madagascar	375 m	-13.255	49.6167	Malagasy	CASC, San Francisco, CA, USA	CASC
CASENT0073336	BLF09558	Pheidole	spinosa	Pheidole.MGs123	1s.	pin	B.L.Fisher	2003-12-01	Antsiranana	Madagascar	375 m	-13.255	49.6167	Malagasy	CASC, San Francisco, CA, USA	CASC
CASENT0073339	BLF09558	Pheidole	spinosa	Pheidole.MG146	1w.	pin	B.L.Fisher	2003-12-01	Antsiranana	Madagascar	375 m	-13.255	49.6167	Malagasy	CASC, San Francisco, CA, USA	CASC
CASENT0073430	BLF06587	Pheidole	spinosa	Pheidole.MG154	1w.	pin	Fisher, Griswold et al.	2002-11-12	Mahajanga	Madagascar	100 m	-16.4067	45.31	Malagasy	CASC, San Francisco, CA, USA	CASC
CASENT0073521	BLF06512	Pheidole	spinosa	Pheidole.MGs123	1s.	pin	Fisher, Griswold et al.	2002-11-08	Mahajanga	Madagascar	100 m	-16.3767	45.3267	Malagasy	CASC, San Francisco, CA, USA	CASC
CASENT0073526	BLF06512	Pheidole	spinosa	Pheidole.MG154	1w.	pin	Fisher, Griswold et al.	2002-11-08	Mahajanga	Madagascar	100 m	-16.3767	45.3267	Malagasy	CASC, San Francisco, CA, USA	CASC
CASENT0073527	BLF06512	Pheidole	spinosa	Pheidole.MG154	1w.	pin	Fisher, Griswold et al.	2002-11-08	Mahajanga	Madagascar	100 m	-16.3767	45.3267	Malagasy	CASC, San Francisco, CA, USA	CASC
CASENT0074528	BLF07507	Pheidole	spinosa	Pheidole.MG155	1w.	pin	Fisher, Griswold et al.	2003-02-05	Toliara	Madagascar	770 m	-22.8433	44.71	Malagasy	CASC, San Francisco, CA, USA	CASC
CASENT0074545	BLF07381	Pheidole	spinosa	Pheidole.MG150	1w.	pin	Fisher, Griswold et al.	2003-02-01	Fianarantsoa	Madagascar	700 m	-22.5917	45.1283	Malagasy	CASC, San Francisco, CA, USA	CASC
CASENT0074546	BLF07381	Pheidole	spinosa	Pheidole.MG148	1w.	pin	Fisher, Griswold et al.	2003-02-01	Fianarantsoa	Madagascar	700 m	-22.5917	45.1283	Malagasy	CASC, San Francisco, CA, USA	CASC
CASENT0074603	BLF07507	Pheidole	spinosa	Pheidole.MG154	1w.	pin	Fisher, Griswold et al.	2003-02-05	Toliara	Madagascar	770 m	-22.8433	44.71	Malagasy	CASC, San Francisco, CA, USA	CASC
CASENT0074647	BLF07507	Pheidole	spinosa	Pheidole.MG147	1w.	pin	Fisher, Griswold et al.	2003-02-05	Toliara	Madagascar	770 m	-22.8433	44.71	Malagasy	CASC, San Francisco, CA, USA	CASC
CASENT0074648	BLF07037	Pheidole	spinosa	Pheidole.MG151	1w.	pin	Fisher, Griswold et al.	2003-01-13	Toliara	Madagascar	1050 m	-18.2667	45.4067	Malagasy	CASC, San Francisco, CA, USA	CASC
CASENT0074656	BLF07507	Pheidole	spinosa	Pheidole.MG151	1w.	pin	Fisher, Griswold et al.	2003-02-05	Toliara	Madagascar	770 m	-22.8433	44.71	Malagasy	CASC, San Francisco, CA, USA	CASC
CASENT0074742	BLF06068	Pheidole	spinosa	Pheidole.MG147	1w.	pin	Fisher-Griswold Arthropod Team	2002-03-12	Toliara	Madagascar	80 m	-22.2331	43.3663	Malagasy	CASC, San Francisco, CA, USA	CASC
CASENT0074768	BLF07381	Pheidole	spinosa	Pheidole.MGs126	1s.	pin	Fisher, Griswold et al.	2003-02-01	Fianarantsoa	Madagascar	700 m	-22.5917	45.1283	Malagasy	CASC, San Francisco, CA, USA	CASC
CASENT0074927	BLF07381	Pheidole	spinosa	Pheidole.MG147	1w.	pin	Fisher, Griswold et al.	2003-02-01	Fianarantsoa	Madagascar	700 m	-22.5917	45.1283	Malagasy	CASC, San Francisco, CA, USA	CASC
CASENT0074931	BLF07381	Pheidole	spinosa	Pheidole.MG154	1w.	pin	Fisher, Griswold et al.	2003-02-01	Fianarantsoa	Madagascar	700 m	-22.5917	45.1283	Malagasy	CASC, San Francisco, CA, USA	CASC
CASENT0076339	BLF09569	Pheidole	spinosa	Pheidole.MG151	3w.	pin	B.L.Fisher	2003-12-01	Antsiranana	Madagascar	375 m	-13.255	49.6167	Malagasy	CASC, San Francisco, CA, USA	CASC
CASENT0076340	BLF09569	Pheidole	spinosa	Pheidole.MG155	3w.	pin	B.L.Fisher	2003-12-01	Antsiranana	Madagascar	375 m	-13.255	49.6167	Malagasy	CASC, San Francisco, CA, USA	CASC
CASENT0076341	BLF09569	Pheidole	spinosa	Pheidole.megacephala	2w., 1s.	pin	B.L.Fisher	2003-12-01	Antsiranana	Madagascar	375 m	-13.255	49.6167	Malagasy	CASC, San Francisco, CA, USA	CASC
CASENT0076350	BLF09577	Pheidole	spinosa	Pheidole.MGs123	1w., 2s.	pin	B.L.Fisher	2003-12-02	Antsiranana	Madagascar	375 m	-13.255	49.6167	Malagasy	CASC, San Francisco, CA, USA	CASC
CASENT0076400	BLF09578	Pheidole	spinosa	Pheidole.MG155	3w.	pin	B.L.Fisher	2003-12-02	Antsiranana	Madagascar	375 m	-13.255	49.6167	Malagasy	CASC, San Francisco, CA, USA	CASC
CASENT0076401	BLF09578	Pheidole	spinosa	Pheidole.MG155	3w.	pin	B.L.Fisher	2003-12-02	Antsiranana	Madagascar	375 m	-13.255	49.6167	Malagasy	CASC, San Francisco, CA, USA	CASC
CASENT0076402	BLF09578	Pheidole	spinosa	Pheidole.MG151	1w., 2s.	pin	B.L.Fisher	2003-12-02	Antsiranana	Madagascar	375 m	-13.255	49.6167	Malagasy	CASC, San Francisco, CA, USA	CASC
CASENT0076779	BLF10229	Pheidole	spinosa	Pheidole.punctulata	1w., 2s.	pin	B.L.Fisher	2003-12-14	Antsiranana	Madagascar	550 m	-13.2117	49.5567	Malagasy	CASC, San Francisco, CA, USA	CASC
CASENT0076781	BLF10229	Pheidole	spinosa	Pheidole.MG151	2w.	pin	B.L.Fisher	2003-12-14	Antsiranana	Madagascar	550 m	-13.2117	49.5567	Malagasy	CASC, San Francisco, CA, USA	CASC
CASENT0076948	BLF08782	Pheidole	spinosa	Pheidole.MG151	1w.	pin	B.L.Fisher et al.	2003-11-12	Antsiranana	Madagascar	450 m	-14.4367	49.775	Malagasy	CASC, San Francisco, CA, USA	CASC
CASENT0077026	BLF08849	Pheidole	spinosa	Pheidole.MG151	3w.	pin	B.L.Fisher et al.	2003-11-12	Antsiranana	Madagascar	450 m	-14.4367	49.775	Malagasy	CASC, San Francisco, CA, USA	CASC
CASENT0077276	BLF08843	Pheidole	spinosa	Pheidole.MG151	3w.	pin	B.L.Fisher et al.	2003-11-12	Antsiranana	Madagascar	450 m	-14.4367	49.775	Malagasy	CASC, San Francisco, CA, USA	CASC
CASENT0077279	BLF08843	Pheidole	spinosa	Pheidole.MGs123	3s.	pin	B.L.Fisher et al.	2003-11-12	Antsiranana	Madagascar	450 m	-14.4367	49.775	Malagasy	CASC, San Francisco, CA, USA	CASC
CASENT0077375	BLF09693	Pheidole	spinosa	Pheidole.MG155	1w.	pin	B.L.Fisher	2003-12-04	Antsiranana	Madagascar	650-800 m	-13.2633	49.6033	Malagasy	CASC, San Francisco, CA, USA	CASC
CASENT0077376	BLF09693	Pheidole	spinosa	Pheidole.MGs128	3s.	pin	B.L.Fisher	2003-12-04	Antsiranana	Madagascar	650-800 m	-13.2633	49.6033	Malagasy	CASC, San Francisco, CA, USA	CASC
CASENT0077377	BLF09693	Pheidole	spinosa	Pheidole.MGs132	1s.	pin	B.L.Fisher	2003-12-04	Antsiranana	Madagascar	650-800 m	-13.2633	49.6033	Malagasy	CASC, San Francisco, CA, USA	CASC
CASENT0077522	BLF09713	Pheidole	spinosa	Pheidole.MG155	1w.	pin	B.L.Fisher	2003-12-04	Antsiranana	Madagascar	650-800 m	-13.2633	49.6033	Malagasy	CASC, San Francisco, CA, USA	CASC
CASENT0077780	BLF09718	Pheidole	spinosa	Pheidole.MG155	3w.	pin	B.L.Fisher	2003-12-04	Antsiranana	Madagascar	650-800 m	-13.2633	49.6033	Malagasy	CASC, San Francisco, CA, USA	CASC
CASENT0077781	BLF09718	Pheidole	spinosa	Pheidole.MG155	3w.	pin	B.L.Fisher	2003-12-04	Antsiranana	Madagascar	650-800 m	-13.2633	49.6033	Malagasy	CASC, San Francisco, CA, USA	CASC
CASENT0077782	BLF09718	Pheidole	spinosa	Pheidole.MGs122	3s.	pin	B.L.Fisher	2003-12-04	Antsiranana	Madagascar	650-800 m	-13.2633	49.6033	Malagasy	CASC, San Francisco, CA, USA	CASC
CASENT0077792	BLF09690	Pheidole	spinosa	Pheidole.MG155	3w.	pin	B.L.Fisher	2003-12-04	Antsiranana	Madagascar	650-800 m	-13.2633	49.6033	Malagasy	CASC, San Francisco, CA, USA	CASC
CASENT0077793	BLF09690	Pheidole	spinosa	Pheidole.MG147	3w.	pin	B.L.Fisher	2003-12-04	Antsiranana	Madagascar	650-800 m	-13.2633	49.6033	Malagasy	CASC, San Francisco, CA, USA	CASC
CASENT0077794	BLF09690	Pheidole	spinosa	Pheidole.MGs128	3s.	pin	B.L.Fisher	2003-12-04	Antsiranana	Madagascar	650-800 m	-13.2633	49.6033	Malagasy	CASC, San Francisco, CA, USA	CASC
CASENT0077905	BLF04511	Pheidole	spinosa	Pheidole.MGs128	1s.	pin	Fisher-Griswold Arthropod Team	2001-11-21	Mahajanga	Madagascar	20 m	-19.0214	44.4407	Malagasy	CASC, San Francisco, CA, USA	CASC
CASENT0077906	BLF04511	Pheidole	spinosa	Pheidole.MGs123	1s.	pin	Fisher-Griswold Arthropod Team	2001-11-21	Mahajanga	Madagascar	20 m	-19.0214	44.4407	Malagasy	CASC, San Francisco, CA, USA	CASC
CASENT0077910	BLF04511	Pheidole	spinosa	Pheidole.MG147	1w.	pin	Fisher-Griswold Arthropod Team	2001-11-21	Mahajanga	Madagascar	20 m	-19.0214	44.4407	Malagasy	CASC, San Francisco, CA, USA	CASC
CASENT0077912	BLF04511	Pheidole	spinosa	Pheidole.MG155	1w.	pin	Fisher-Griswold Arthropod Team	2001-11-21	Mahajanga	Madagascar	20 m	-19.0214	44.4407	Malagasy	CASC, San Francisco, CA, USA	CASC
CASENT0077933	BLF05965	Pheidole	spinosa	Pheidole.MGs132	1s.	pin	Fisher-Griswold Arthropod Team	2002-03-06	Toliara	Madagascar	70 m	-22.8022	43.4207	Malagasy	CASC, San Francisco, CA, USA	CASC
CASENT0077937	BLF05965	Pheidole	spinosa	Pheidole.MG154	1w.	pin	Fisher-Griswold Arthropod Team	2002-03-06	Toliara	Madagascar	70 m	-22.8022	43.4207	Malagasy	CASC, San Francisco, CA, USA	CASC
CASENT0077938	BLF05965	Pheidole	spinosa	Pheidole.MG150	1w.	pin	Fisher-Griswold Arthropod Team	2002-03-06	Toliara	Madagascar	70 m	-22.8022	43.4207	Malagasy	CASC, San Francisco, CA, USA	CASC
CASENT0077946	BLF05965	Pheidole	spinosa	Pheidole.MGs123	1s.	pin	Fisher-Griswold Arthropod Team	2002-03-06	Toliara	Madagascar	70 m	-22.8022	43.4207	Malagasy	CASC, San Francisco, CA, USA	CASC
CASENT0077947	BLF05965	Pheidole	spinosa	Pheidole.MG154	1w.	pin	Fisher-Griswold Arthropod Team	2002-03-06	Toliara	Madagascar	70 m	-22.8022	43.4207	Malagasy	CASC, San Francisco, CA, USA	CASC
CASENT0077997	BLF06258	Pheidole	spinosa	Pheidole.MG148	1w.	pin	Fisher-Griswold Arthropod Team	2002-03-22	Toliara	Madagascar	90 m	-23.9922	43.8807	Malagasy	CASC, San Francisco, CA, USA	CASC
CASENT0078033	BLF06258	Pheidole	spinosa	Pheidole.MGs122	1s.	pin	Fisher-Griswold Arthropod Team	2002-03-22	Toliara	Madagascar	90 m	-23.9922	43.8807	Malagasy	CASC, San Francisco, CA, USA	CASC
CASENT0078039	BLF06258	Pheidole	spinosa	Pheidole.MG146	1w.	pin	Fisher-Griswold Arthropod Team	2002-03-22	Toliara	Madagascar	90 m	-23.9922	43.8807	Malagasy	CASC, San Francisco, CA, USA	CASC
CASENT0078040	BLF06258	Pheidole	spinosa	Pheidole.MG154	1w.	pin	Fisher-Griswold Arthropod Team	2002-03-22	Toliara	Madagascar	90 m	-23.9922	43.8807	Malagasy	CASC, San Francisco, CA, USA	CASC
CASENT0078046	BLF06258	Pheidole	spinosa	Pheidole.MG147	1w.	pin	Fisher-Griswold Arthropod Team	2002-03-22	Toliara	Madagascar	90 m	-23.9922	43.8807	Malagasy	CASC, San Francisco, CA, USA	CASC
CASENT0078107	BLF04230	Pheidole	spinosa	Pheidole.MG154	1w.	pin	Fisher-Griswold Arthropod Team	2001-11-06	Mahajanga	Madagascar	50 m	-19.1419	44.828	Malagasy	CASC, San Francisco, CA, USA	CASC
CASENT0078110	BLF04230	Pheidole	spinosa	Pheidole.MG148	1w.	pin	Fisher-Griswold Arthropod Team	2001-11-06	Mahajanga	Madagascar	50 m	-19.1419	44.828	Malagasy	CASC, San Francisco, CA, USA	CASC
CASENT0078126	BLF04230	Pheidole	spinosa	Pheidole.MGs128	1s.	pin	Fisher-Griswold Arthropod Team	2001-11-06	Mahajanga	Madagascar	50 m	-19.1419	44.828	Malagasy	CASC, San Francisco, CA, USA	CASC
CASENT0078173	BLF04341	Pheidole	spinosa	Pheidole.MG155	1w.	pin	Fisher-Griswold Arthropod Team	2001-11-11	Mahajanga	Madagascar	100 m	-19.1322	44.8147	Malagasy	CASC, San Francisco, CA, USA	CASC
CASENT0078176	BLF04341	Pheidole	spinosa	Pheidole.MG154	1w.	pin	Fisher-Griswold Arthropod Team	2001-11-11	Mahajanga	Madagascar	100 m	-19.1322	44.8147	Malagasy	CASC, San Francisco, CA, USA	CASC
CASENT0078177	BLF04341	Pheidole	spinosa	Pheidole.MG148	1w.	pin	Fisher-Griswold Arthropod Team	2001-11-11	Mahajanga	Madagascar	100 m	-19.1322	44.8147	Malagasy	CASC, San Francisco, CA, USA	CASC
CASENT0078192	BLF04341	Pheidole	spinosa	Pheidole.MG150	1w.	pin	Fisher-Griswold Arthropod Team	2001-11-11	Mahajanga	Madagascar	100 m	-19.1322	44.8147	Malagasy	CASC, San Francisco, CA, USA	CASC
CASENT0078207	BLF04341	Pheidole	spinosa	Pheidole.MGs123	1s.	pin	Fisher-Griswold Arthropod Team	2001-11-11	Mahajanga	Madagascar	100 m	-19.1322	44.8147	Malagasy	CASC, San Francisco, CA, USA	CASC
CASENT0078315	BLF05763	Pheidole	spinosa	Pheidole.MG155	1w.	pin	Fisher-Griswold Arthropod Team	2002-02-21	Toliara	Madagascar	80 m	-24.6536	43.9967	Malagasy	CASC, San Francisco, CA, USA	CASC
CASENT0078425	BLF04433	Pheidole	spinosa	Pheidole.MGs122	1s.	pin	Fisher-Griswold Arthropod Team	2001-11-16	Mahajanga	Madagascar	150 m	-18.7094	44.7182	Malagasy	CASC, San Francisco, CA, USA	CASC
CASENT0078427	BLF04433	Pheidole	spinosa	Pheidole.MG154	1w.	pin	Fisher-Griswold Arthropod Team	2001-11-16	Mahajanga	Madagascar	150 m	-18.7094	44.7182	Malagasy	CASC, San Francisco, CA, USA	CASC
CASENT0078434	BLF04433	Pheidole	spinosa	Pheidole.MG150	1w.	pin	Fisher-Griswold Arthropod Team	2001-11-16	Mahajanga	Madagascar	150 m	-18.7094	44.7182	Malagasy	CASC, San Francisco, CA, USA	CASC
CASENT0078467	BLF05650	Pheidole	spinosa	Pheidole.MG150	1w.	pin	Fisher-Griswold Arthropod Team	2002-02-13	Toliara	Madagascar	160 m	-25.5944	45.1468	Malagasy	CASC, San Francisco, CA, USA	CASC
CASENT0078468	BLF05650	Pheidole	spinosa	Pheidole.MGs122	1s.	pin	Fisher-Griswold Arthropod Team	2002-02-13	Toliara	Madagascar	160 m	-25.5944	45.1468	Malagasy	CASC, San Francisco, CA, USA	CASC
CASENT0078476	BLF05650	Pheidole	spinosa	Pheidole.MG154	1w.	pin	Fisher-Griswold Arthropod Team	2002-02-13	Toliara	Madagascar	160 m	-25.5944	45.1468	Malagasy	CASC, San Francisco, CA, USA	CASC
CASENT0078477	BLF05650	Pheidole	spinosa	Pheidole.MG145	1w.	pin	Fisher-Griswold Arthropod Team	2002-02-13	Toliara	Madagascar	160 m	-25.5944	45.1468	Malagasy	CASC, San Francisco, CA, USA	CASC
CASENT0078481	BLF05650	Pheidole	spinosa	Pheidole.MG154	1w.	pin	Fisher-Griswold Arthropod Team	2002-02-13	Toliara	Madagascar	160 m	-25.5944	45.1468	Malagasy	CASC, San Francisco, CA, USA	CASC
CASENT0078487	BLF05650	Pheidole	spinosa	Pheidole.MG155	1w.	pin	Fisher-Griswold Arthropod Team	2002-02-13	Toliara	Madagascar	160 m	-25.5944	45.1468	Malagasy	CASC, San Francisco, CA, USA	CASC
CASENT0078489	BLF05763	Pheidole	spinosa	Pheidole.MG145	1w.	pin	Fisher-Griswold Arthropod Team	2002-02-21	Toliara	Madagascar	80 m	-24.6536	43.9967	Malagasy	CASC, San Francisco, CA, USA	CASC
CASENT0078493	BLF05763	Pheidole	spinosa	Pheidole.MG154	1w.	pin	Fisher-Griswold Arthropod Team	2002-02-21	Toliara	Madagascar	80 m	-24.6536	43.9967	Malagasy	CASC, San Francisco, CA, USA	CASC
CASENT0078498	BLF05763	Pheidole	spinosa	Pheidole.MG150	1w.	pin	Fisher-Griswold Arthropod Team	2002-02-21	Toliara	Madagascar	80 m	-24.6536	43.9967	Malagasy	CASC, San Francisco, CA, USA	CASC
CASENT0078501	BLF05763	Pheidole	spinosa	Pheidole.MG147	1w.	pin	Fisher-Griswold Arthropod Team	2002-02-21	Toliara	Madagascar	80 m	-24.6536	43.9967	Malagasy	CASC, San Francisco, CA, USA	CASC
CASENT0078502	BLF05763	Pheidole	spinosa	Pheidole.MG147	1w.	pin	Fisher-Griswold Arthropod Team	2002-02-21	Toliara	Madagascar	80 m	-24.6536	43.9967	Malagasy	CASC, San Francisco, CA, USA	CASC
CASENT0078505	BLF05763	Pheidole	spinosa	Pheidole.MGs128	1s.	pin	Fisher-Griswold Arthropod Team	2002-02-21	Toliara	Madagascar	80 m	-24.6536	43.9967	Malagasy	CASC, San Francisco, CA, USA	CASC
CASENT0078506	BLF05763	Pheidole	spinosa	Pheidole.MG145	1w.	pin	Fisher-Griswold Arthropod Team	2002-02-21	Toliara	Madagascar	80 m	-24.6536	43.9967	Malagasy	CASC, San Francisco, CA, USA	CASC
CASENT0078668	MA-01-07-06	Pheidole	spinosa	Pheidole.MG151	1w.	pin	R. Harin'Hala	2001-01-29	Diego-Suarez	Madagascar	360 m	-12.3333	49.25	Malagasy	CASC, San Francisco, CA, USA	CASC
CASENT0078680	MA-01-07-06	Pheidole	spinosa	Pheidole.MG150	1w.	pin	R. Harin'Hala	2001-01-29	Diego-Suarez	Madagascar	360 m	-12.3333	49.25	Malagasy	CASC, San Francisco, CA, USA	CASC
CASENT0078681	MA-01-07-06	Pheidole	spinosa	Pheidole.MG146	1w.	pin	R. Harin'Hala	2001-01-29	Diego-Suarez	Madagascar	360 m	-12.3333	49.25	Malagasy	CASC, San Francisco, CA, USA	CASC
CASENT0078682	MA-01-07-06	Pheidole	spinosa	Pheidole.MG154	1w.	pin	R. Harin'Hala	2001-01-29	Diego-Suarez	Madagascar	360 m	-12.3333	49.25	Malagasy	CASC, San Francisco, CA, USA	CASC
CASENT0079011	BLF05314	Pheidole	spinosa	Pheidole.MGs122	1s.	pin	Fisher-Griswold Arthropod Team	2002-02-03	Toliara	Madagascar	35 m	-24.9569	46.2715	Malagasy	CASC, San Francisco, CA, USA	CASC
CASENT0079032	BLF05239	Pheidole	spinosa	Pheidole.MGs122	1s.	pin	Fisher-Griswold Arthropod Team	2002-01-28	Toliara	Madagascar	110 m	-24.7583	46.1572	Malagasy	CASC, San Francisco, CA, USA	CASC
CASENT0079034	BLF05239	Pheidole	spinosa	Pheidole.MG154	1w.	pin	Fisher-Griswold Arthropod Team	2002-01-28	Toliara	Madagascar	110 m	-24.7583	46.1572	Malagasy	CASC, San Francisco, CA, USA	CASC
CASENT0079035	BLF05739	Pheidole	spinosa	Pheidole.MG145	1w.	pin	Fisher-Griswold Arthropod Team	2002-02-17	Toliara	Madagascar	150 m	-25.4456	44.9958	Malagasy	CASC, San Francisco, CA, USA	CASC
CASENT0079036	BLF05239	Pheidole	spinosa	Pheidole.MG145	1w.	pin	Fisher-Griswold Arthropod Team	2002-01-28	Toliara	Madagascar	110 m	-24.7583	46.1572	Malagasy	CASC, San Francisco, CA, USA	CASC
CASENT0079037	BLF05239	Pheidole	spinosa	Pheidole.MG147	1w.	pin	Fisher-Griswold Arthropod Team	2002-01-28	Toliara	Madagascar	110 m	-24.7583	46.1572	Malagasy	CASC, San Francisco, CA, USA	CASC
CASENT0079075	BLF05499	Pheidole	spinosa	Pheidole.MG155	1w.	pin	Fisher-Griswold Arthropod Team	2002-02-11	Toliara	Madagascar	200 m	-25.5817	45.1683	Malagasy	CASC, San Francisco, CA, USA	CASC
CASENT0079078	BLF05499	Pheidole	spinosa	Pheidole.MGs122	1s.	pin	Fisher-Griswold Arthropod Team	2002-02-11	Toliara	Madagascar	200 m	-25.5817	45.1683	Malagasy	CASC, San Francisco, CA, USA	CASC
CASENT0079122	BLF05848	Pheidole	spinosa	Pheidole.MG146	1w.	pin	Fisher-Griswold Arthropod Team	2002-02-27	Toliara	Madagascar	75 m	-23.5242	44.1213	Malagasy	CASC, San Francisco, CA, USA	CASC
CASENT0079126	BLF05848	Pheidole	spinosa	Pheidole.MG147	1w.	pin	Fisher-Griswold Arthropod Team	2002-02-27	Toliara	Madagascar	75 m	-23.5242	44.1213	Malagasy	CASC, San Francisco, CA, USA	CASC
CASENT0079127	BLF05848	Pheidole	spinosa	Pheidole.MGs120	1s.	pin	Fisher-Griswold Arthropod Team	2002-02-27	Toliara	Madagascar	75 m	-23.5242	44.1213	Malagasy	CASC, San Francisco, CA, USA	CASC
CASENT0079129	BLF05848	Pheidole	spinosa	Pheidole.MGs123	1s.	pin	Fisher-Griswold Arthropod Team	2002-02-27	Toliara	Madagascar	75 m	-23.5242	44.1213	Malagasy	CASC, San Francisco, CA, USA	CASC
CASENT0079176	BLF04600	Pheidole	spinosa	Pheidole.MG148	1w.	pin	Fisher-Griswold Arthropod Team	2001-11-28	Toliara	Madagascar	100 m	-20.045	44.6622	Malagasy	CASC, San Francisco, CA, USA	CASC
CASENT0079232	BLF04815	Pheidole	spinosa	Pheidole.MG147	1w.	pin	Fisher-Griswold Arthropod Team	2002-01-12	Toliara	Madagascar	150 m	-24.8169	46.61	Malagasy	CASC, San Francisco, CA, USA	CASC
CASENT0079233	BLF04815	Pheidole	spinosa	Pheidole.MG158	1w.	pin	Fisher-Griswold Arthropod Team	2002-01-12	Toliara	Madagascar	150 m	-24.8169	46.61	Malagasy	CASC, San Francisco, CA, USA	CASC
CASENT0079234	BLF04815	Pheidole	spinosa	Pheidole.MG154	1w.	pin	Fisher-Griswold Arthropod Team	2002-01-12	Toliara	Madagascar	150 m	-24.8169	46.61	Malagasy	CASC, San Francisco, CA, USA	CASC
CASENT0079235	BLF04815	Pheidole	spinosa	Pheidole.MGs120	1s.	pin	Fisher-Griswold Arthropod Team	2002-01-12	Toliara	Madagascar	150 m	-24.8169	46.61	Malagasy	CASC, San Francisco, CA, USA	CASC
CASENT0079236	BLF04815	Pheidole	spinosa	Pheidole.MGs122	1s.	pin	Fisher-Griswold Arthropod Team	2002-01-12	Toliara	Madagascar	150 m	-24.8169	46.61	Malagasy	CASC, San Francisco, CA, USA	CASC
CASENT0079269	BLF06161	Pheidole	spinosa	Pheidole.MG147	1w.	pin	Fisher-Griswold Arthropod Team	2002-03-18	Toliara	Madagascar	40 m	-24.0472	43.7532	Malagasy	CASC, San Francisco, CA, USA	CASC
CASENT0079270	BLF06161	Pheidole	spinosa	Pheidole.MG154	1w.	pin	Fisher-Griswold Arthropod Team	2002-03-18	Toliara	Madagascar	40 m	-24.0472	43.7532	Malagasy	CASC, San Francisco, CA, USA	CASC
CASENT0079271	BLF06161	Pheidole	spinosa	Pheidole.MGs128	1s.	pin	Fisher-Griswold Arthropod Team	2002-03-18	Toliara	Madagascar	40 m	-24.0472	43.7532	Malagasy	CASC, San Francisco, CA, USA	CASC
CASENT0079273	BLF06161	Pheidole	spinosa	Pheidole.MGs122	1s.	pin	Fisher-Griswold Arthropod Team	2002-03-18	Toliara	Madagascar	40 m	-24.0472	43.7532	Malagasy	CASC, San Francisco, CA, USA	CASC
CASENT0079339	BLF04725	Pheidole	spinosa	Pheidole.MG147	1w.	pin	Fisher-Griswold Arthropod Team	2001-12-06	Toliara	Madagascar	80 m	-20.7953	44.147	Malagasy	CASC, San Francisco, CA, USA	CASC
CASENT0079341	BLF04725	Pheidole	spinosa	Pheidole.MGs122	1s.	pin	Fisher-Griswold Arthropod Team	2001-12-06	Toliara	Madagascar	80 m	-20.7953	44.147	Malagasy	CASC, San Francisco, CA, USA	CASC
CASENT0079342	BLF04725	Pheidole	spinosa	Pheidole.MGs128	1s.	pin	Fisher-Griswold Arthropod Team	2001-12-06	Toliara	Madagascar	80 m	-20.7953	44.147	Malagasy	CASC, San Francisco, CA, USA	CASC
CASENT0079371	BLF04915	Pheidole	spinosa	Pheidole.MG010	1w.	pin	Fisher-Griswold Arthropod Team	2002-01-16	Toliara	Madagascar	300 m	-24.93	46.6455	Malagasy	CASC, San Francisco, CA, USA	CASC
CASENT0079372	BLF04915	Pheidole	spinosa	Pheidole.MG155	1w.	pin	Fisher-Griswold Arthropod Team	2002-01-16	Toliara	Madagascar	300 m	-24.93	46.6455	Malagasy	CASC, San Francisco, CA, USA	CASC
CASENT0079374	BLF04915	Pheidole	spinosa	Pheidole.MG154	1w.	pin	Fisher-Griswold Arthropod Team	2002-01-16	Toliara	Madagascar	300 m	-24.93	46.6455	Malagasy	CASC, San Francisco, CA, USA	CASC
CASENT0079378	BLF04915	Pheidole	spinosa	Pheidole.MGs122	1s.	pin	Fisher-Griswold Arthropod Team	2002-01-16	Toliara	Madagascar	300 m	-24.93	46.6455	Malagasy	CASC, San Francisco, CA, USA	CASC
CASENT0079586	MA-02-09C-21	Pheidole	spinosa	Pheidole.MG154	1w.	pin	R. Harin'Hala	2002-03-19	Fianarantsoa	Madagascar	1020 m	-21.2665	47.4202	Malagasy	CASC, San Francisco, CA, USA	CASC
CASENT0080042	BLF04462	Pheidole	spinosa	Pheidole.MGs123	1s.	pin	Fisher-Griswold Arthropod Team	2001-11-16	Mahajanga	Madagascar	150 m	-18.7094	44.7182	Malagasy	CASC, San Francisco, CA, USA	CASC
CASENT0080043	BLF04462	Pheidole	spinosa	Pheidole.MG150	1w.	pin	Fisher-Griswold Arthropod Team	2001-11-16	Mahajanga	Madagascar	150 m	-18.7094	44.7182	Malagasy	CASC, San Francisco, CA, USA	CASC
CASENT0080045	BLF04462	Pheidole	spinosa	Pheidole.MG148	1w.	pin	Fisher-Griswold Arthropod Team	2001-11-16	Mahajanga	Madagascar	150 m	-18.7094	44.7182	Malagasy	CASC, San Francisco, CA, USA	CASC
CASENT0080047	BLF04462	Pheidole	spinosa	Pheidole.MG154	1w.	pin	Fisher-Griswold Arthropod Team	2001-11-16	Mahajanga	Madagascar	150 m	-18.7094	44.7182	Malagasy	CASC, San Francisco, CA, USA	CASC
CASENT0080049	BLF04462	Pheidole	spinosa	Pheidole.MG151	1w.	pin	Fisher-Griswold Arthropod Team	2001-11-16	Mahajanga	Madagascar	150 m	-18.7094	44.7182	Malagasy	CASC, San Francisco, CA, USA	CASC
CASENT0080053	BLF04507	Pheidole	spinosa	Pheidole.MG150	1w.	pin	Fisher-Griswold Arthropod Team	2001-11-21	Mahajanga	Madagascar	20 m	-19.0214	44.4407	Malagasy	CASC, San Francisco, CA, USA	CASC
CASENT0080055	BLF04507	Pheidole	spinosa	Pheidole.MG151	1w.	pin	Fisher-Griswold Arthropod Team	2001-11-21	Mahajanga	Madagascar	20 m	-19.0214	44.4407	Malagasy	CASC, San Francisco, CA, USA	CASC
CASENT0080059	BLF04507	Pheidole	spinosa	Pheidole.MG147	1w.	pin	Fisher-Griswold Arthropod Team	2001-11-21	Mahajanga	Madagascar	20 m	-19.0214	44.4407	Malagasy	CASC, San Francisco, CA, USA	CASC
CASENT0080063	BLF04507	Pheidole	spinosa	Pheidole.MG148	1w.	pin	Fisher-Griswold Arthropod Team	2001-11-21	Mahajanga	Madagascar	20 m	-19.0214	44.4407	Malagasy	CASC, San Francisco, CA, USA	CASC
CASENT0080071	BLF04917	Pheidole	spinosa	Pheidole.MG150	1w.	pin	Fisher-Griswold Arthropod Team	2002-01-16	Toliara	Madagascar	300 m	-24.93	46.6455	Malagasy	CASC, San Francisco, CA, USA	CASC
CASENT0080072	BLF04917	Pheidole	spinosa	Pheidole.MG155	1w.	pin	Fisher-Griswold Arthropod Team	2002-01-16	Toliara	Madagascar	300 m	-24.93	46.6455	Malagasy	CASC, San Francisco, CA, USA	CASC
CASENT0080073	BLF04917	Pheidole	spinosa	Pheidole.MG154	1w.	pin	Fisher-Griswold Arthropod Team	2002-01-16	Toliara	Madagascar	300 m	-24.93	46.6455	Malagasy	CASC, San Francisco, CA, USA	CASC
CASENT0080080	BLF05237	Pheidole	spinosa	Pheidole.MG148	1w.	pin	Fisher-Griswold Arthropod Team	2002-01-28	Toliara	Madagascar	110 m	-24.7583	46.1572	Malagasy	CASC, San Francisco, CA, USA	CASC
CASENT0080082	BLF05237	Pheidole	spinosa	Pheidole.MG147	1w.	pin	Fisher-Griswold Arthropod Team	2002-01-28	Toliara	Madagascar	110 m	-24.7583	46.1572	Malagasy	CASC, San Francisco, CA, USA	CASC
CASENT0080084	BLF05237	Pheidole	spinosa	Pheidole.MG146	1w.	pin	Fisher-Griswold Arthropod Team	2002-01-28	Toliara	Madagascar	110 m	-24.7583	46.1572	Malagasy	CASC, San Francisco, CA, USA	CASC
CASENT0080085	BLF05237	Pheidole	spinosa	Pheidole.MG155	1w.	pin	Fisher-Griswold Arthropod Team	2002-01-28	Toliara	Madagascar	110 m	-24.7583	46.1572	Malagasy	CASC, San Francisco, CA, USA	CASC
CASENT0080089	BLF05313	Pheidole	spinosa	Pheidole.MG150	1w.	pin	Fisher-Griswold Arthropod Team	2002-02-03	Toliara	Madagascar	35 m	-24.9569	46.2715	Malagasy	CASC, San Francisco, CA, USA	CASC
CASENT0080094	BLF05313	Pheidole	spinosa	Pheidole.MG154	1w.	pin	Fisher-Griswold Arthropod Team	2002-02-03	Toliara	Madagascar	35 m	-24.9569	46.2715	Malagasy	CASC, San Francisco, CA, USA	CASC
CASENT0080096	BLF05313	Pheidole	spinosa	Pheidole.MG148	1w.	pin	Fisher-Griswold Arthropod Team	2002-02-03	Toliara	Madagascar	35 m	-24.9569	46.2715	Malagasy	CASC, San Francisco, CA, USA	CASC
CASENT0080097	BLF05313	Pheidole	spinosa	Pheidole.MG146	1w.	pin	Fisher-Griswold Arthropod Team	2002-02-03	Toliara	Madagascar	35 m	-24.9569	46.2715	Malagasy	CASC, San Francisco, CA, USA	CASC
CASENT0080319	BLF04601	Pheidole	spinosa	Pheidole.MG148	1w.	pin	Fisher-Griswold Arthropod Team	2001-11-28	Toliara	Madagascar	100 m	-20.045	44.6622	Malagasy	CASC, San Francisco, CA, USA	CASC
CASENT0080322	BLF04601	Pheidole	spinosa	Pheidole.MG155	1w.	pin	Fisher-Griswold Arthropod Team	2001-11-28	Toliara	Madagascar	100 m	-20.045	44.6622	Malagasy	CASC, San Francisco, CA, USA	CASC
CASENT0080682	BLF05651	Pheidole	spinosa	Pheidole.MG146	1w.	pin	Fisher-Griswold Arthropod Team	2002-02-13	Toliara	Madagascar	160 m	-25.5944	45.1468	Malagasy	CASC, San Francisco, CA, USA	CASC
CASENT0080683	BLF05651	Pheidole	spinosa	Pheidole.MG154	1w.	pin	Fisher-Griswold Arthropod Team	2002-02-13	Toliara	Madagascar	160 m	-25.5944	45.1468	Malagasy	CASC, San Francisco, CA, USA	CASC
CASENT0080684	BLF05651	Pheidole	spinosa	Pheidole.MG150	1w.	pin	Fisher-Griswold Arthropod Team	2002-02-13	Toliara	Madagascar	160 m	-25.5944	45.1468	Malagasy	CASC, San Francisco, CA, USA	CASC
CASENT0080685	BLF05849	Pheidole	spinosa	Pheidole.MG150	1w.	pin	Fisher-Griswold Arthropod Team	2002-02-27	Toliara	Madagascar	75 m	-23.5242	44.1213	Malagasy	CASC, San Francisco, CA, USA	CASC
CASENT0080854	BLF03693	Pheidole	spinosa	Pheidole.MG151	1w.	pin	Fisher, Griswold et al.	2001-04-17	Antananarivo	Madagascar	1410 m	-18.2253	47.2868	Malagasy	CASC, San Francisco, CA, USA	CASC
CASENT0081005	BLF03693	Pheidole	spinosa	Pheidole.MG154	1w.	pin	Fisher, Griswold et al.	2001-04-17	Antananarivo	Madagascar	1410 m	-18.2253	47.2868	Malagasy	CASC, San Francisco, CA, USA	CASC
CASENT0081008	BLF05693	Pheidole	spinosa	Pheidole.MG158	1w.	pin	Fisher-Griswold Arthropod Team	2002-02-13	Toliara	Madagascar	160 m	-25.5944	45.1468	Malagasy	CASC, San Francisco, CA, USA	CASC
CASENT0081028	BLF03199	Pheidole	spinosa	Pheidole.MG154	1w.	pin	Fisher, Griswold et al.	2001-02-22	Antsiranana	Madagascar	90 m	-12.2589	49.3747	Malagasy	CASC, San Francisco, CA, USA	CASC
CASENT0081066	BLF02856	Pheidole	spinosa	Pheidole.MG148	1w.	pin	Fisher, Griswold et al.	2001-02-10	Antsiranana	Madagascar	80 m	-12.9089	49.1098	Malagasy	CASC, San Francisco, CA, USA	CASC
CASENT0081069	BLF02856	Pheidole	spinosa	Pheidole.MG145	1w.	pin	Fisher, Griswold et al.	2001-02-10	Antsiranana	Madagascar	80 m	-12.9089	49.1098	Malagasy	CASC, San Francisco, CA, USA	CASC
CASENT0081070	BLF02856	Pheidole	spinosa	Pheidole.MG154	1w.	pin	Fisher, Griswold et al.	2001-02-10	Antsiranana	Madagascar	80 m	-12.9089	49.1098	Malagasy	CASC, San Francisco, CA, USA	CASC
CASENT0081149	MA-02-14A-08	Pheidole	spinosa	Pheidole.MG150	1w.	pin	R. Harin'Hala	2001-12-25	Tulear	Madagascar	165 m	-23.6865	44.591	Malagasy	CASC, San Francisco, CA, USA	CASC
CASENT0081152	MA-02-14A-08	Pheidole	spinosa	Pheidole.MG154	1w.	pin	R. Harin'Hala	2001-12-25	Tulear	Madagascar	165 m	-23.6865	44.591	Malagasy	CASC, San Francisco, CA, USA	CASC
CASENT0081153	MA-02-14A-08	Pheidole	spinosa	Pheidole.MG151	1w.	pin	R. Harin'Hala	2001-12-25	Tulear	Madagascar	165 m	-23.6865	44.591	Malagasy	CASC, San Francisco, CA, USA	CASC
CASENT0081154	MA-02-14A-08	Pheidole	spinosa	Pheidole.MG151	1w.	pin	R. Harin'Hala	2001-12-25	Tulear	Madagascar	165 m	-23.6865	44.591	Malagasy	CASC, San Francisco, CA, USA	CASC
CASENT0081157	MA-02-14A-08	Pheidole	spinosa	Pheidole.MG155	1w.	pin	R. Harin'Hala	2001-12-25	Tulear	Madagascar	165 m	-23.6865	44.591	Malagasy	CASC, San Francisco, CA, USA	CASC
CASENT0081274	BLF05501	Pheidole	spinosa	Pheidole.MG148	1w.	pin	Fisher-Griswold Arthropod Team	2002-02-11	Toliara	Madagascar	200 m	-25.5817	45.1683	Malagasy	CASC, San Francisco, CA, USA	CASC
CASENT0081720	BLF03199	Pheidole	spinosa	Pheidole.MG151	1w.	pin	Fisher, Griswold et al.	2001-02-22	Antsiranana	Madagascar	90 m	-12.2589	49.3747	Malagasy	CASC, San Francisco, CA, USA	CASC
CASENT0081757	BLF03011	Pheidole	spinosa	Pheidole.MG150	1w.	pin	Fisher, Griswold et al.	2001-02-16	Antsiranana	Madagascar	210 m	-12.8636	49.2258	Malagasy	CASC, San Francisco, CA, USA	CASC
CASENT0081820	BLF03419	Pheidole	spinosa	Pheidole.MG151	1w.	pin	Fisher, Griswold et al.	2001-03-19	Antsiranana	Madagascar	30 m	-13.4193	48.3312	Malagasy	CASC, San Francisco, CA, USA	CASC
CASENT0081821	BLF03419	Pheidole	spinosa	Pheidole.MG152	1w.	pin	Fisher, Griswold et al.	2001-03-19	Antsiranana	Madagascar	30 m	-13.4193	48.3312	Malagasy	CASC, San Francisco, CA, USA	CASC
CASENT0081837	BLF02661	Pheidole	spinosa	Pheidole.MG155	1w.	pin	Fisher, Griswold et al.	2001-01-26	Antsiranana	Madagascar	325 m	-12.4689	49.2422	Malagasy	CASC, San Francisco, CA, USA	CASC
CASENT0081838	BLF02661	Pheidole	spinosa	Pheidole.MG154	1w.	pin	Fisher, Griswold et al.	2001-01-26	Antsiranana	Madagascar	325 m	-12.4689	49.2422	Malagasy	CASC, San Francisco, CA, USA	CASC
CASENT0081953	MA-01-04B-18	Pheidole	spinosa	Pheidole.MG154	1w.	pin	R. Harin'Hala	2001-08-20	Antsiranana	Madagascar	10 m	-12.2697	49.3917	Malagasy	CASC, San Francisco, CA, USA	CASC
CASENT0081954	MA-01-04B-18	Pheidole	spinosa	Pheidole.MG155	1w.	pin	R. Harin'Hala	2001-08-20	Antsiranana	Madagascar	10 m	-12.2697	49.3917	Malagasy	CASC, San Francisco, CA, USA	CASC
CASENT0081955	MA-01-04B-18	Pheidole	spinosa	Pheidole.MG154	1w.	pin	R. Harin'Hala	2001-08-20	Antsiranana	Madagascar	10 m	-12.2697	49.3917	Malagasy	CASC, San Francisco, CA, USA	CASC
CASENT0082017	MA-01-04B-13	Pheidole	spinosa	Pheidole.MG151	1w.	pin	R. Harin'Hala	2001-06-25	Antsiranana	Madagascar	10 m	-12.2697	49.3917	Malagasy	CASC, San Francisco, CA, USA	CASC
CASENT0082038	MA-01-01D-05	Pheidole	spinosa	Pheidole.MG154	1w.	pin	R. Harin'Hala	2001-03-04	Diego-Suarez	Madagascar	1125 m	-12.5333	49.1667	Malagasy	CASC, San Francisco, CA, USA	CASC
CASENT0082039	MA-01-01D-05	Pheidole	spinosa	Pheidole.MG146	1w.	pin	R. Harin'Hala	2001-03-04	Diego-Suarez	Madagascar	1125 m	-12.5333	49.1667	Malagasy	CASC, San Francisco, CA, USA	CASC
CASENT0082085	MA-01-04B-06	Pheidole	spinosa	Pheidole.MG146	1w.	pin	R. Harin'Hala	2001-04-07	Antsiranana	Madagascar	10 m	-12.2697	49.3917	Malagasy	CASC, San Francisco, CA, USA	CASC
CASENT0082087	MA-01-04B-06	Pheidole	spinosa	Pheidole.MG145	1w.	pin	R. Harin'Hala	2001-04-07	Antsiranana	Madagascar	10 m	-12.2697	49.3917	Malagasy	CASC, San Francisco, CA, USA	CASC
CASENT0082088	MA-01-04B-06	Pheidole	spinosa	Pheidole.MG151	1w.	pin	R. Harin'Hala	2001-04-07	Antsiranana	Madagascar	10 m	-12.2697	49.3917	Malagasy	CASC, San Francisco, CA, USA	CASC
CASENT0082156	MA-01-01D-08	Pheidole	spinosa	Pheidole.MG146	1w.	pin	R. Harin'Hala	2001-04-21	Diego-Suarez	Madagascar	1125 m	-12.5333	49.1667	Malagasy	CASC, San Francisco, CA, USA	CASC
CASENT0454246	BLF04963	Pheidole	spinosa	Pheidole.megacephala spinosa	3s.	pin	Fisher-Griswold Arthropod Team	2002-01-16	Toliara	Madagascar	300 m	-24.93	46.6455	Malagasy	CASC, San Francisco, CA, USA	on loan to S. Salata
CASENT0454244	BLF04963	Pheidole	spinosa	Pheidole.megacephala spinosa	3w.	pin	Fisher-Griswold Arthropod Team	2002-01-16	Toliara	Madagascar	300 m	-24.93	46.6455	Malagasy	CASC, San Francisco, CA, USA	on loan to S. Salata
CASENT0082343	MA-01-04B-05	Pheidole	spinosa	Pheidole.MG151	1w.	pin	R. Harin'Hala	2001-03-20	Antsiranana	Madagascar	10 m	-12.2697	49.3917	Malagasy	CASC, San Francisco, CA, USA	CASC
CASENT0082345	MA-01-04B-05	Pheidole	spinosa	Pheidole.MG146	1w.	pin	R. Harin'Hala	2001-03-20	Antsiranana	Madagascar	10 m	-12.2697	49.3917	Malagasy	CASC, San Francisco, CA, USA	CASC
CASENT0082346	MA-01-04B-05	Pheidole	spinosa	Pheidole.MG158	1w.	pin	R. Harin'Hala	2001-03-20	Antsiranana	Madagascar	10 m	-12.2697	49.3917	Malagasy	CASC, San Francisco, CA, USA	CASC
CASENT0082470	BLF03250	Pheidole	spinosa	Pheidole.MGs122	1s.	pin	Fisher, Griswold et al.	2001-03-04	Antsiranana	Madagascar	600 m	-13.7986	48.1617	Malagasy	CASC, San Francisco, CA, USA	CASC
CASENT0082820	MA-01-04B-03	Pheidole	spinosa	Pheidole.MG154	1w.	pin	R. Harin'Hala	2001-02-15	Antsiranana	Madagascar	10 m	-12.2697	49.3917	Malagasy	CASC, San Francisco, CA, USA	CASC
CASENT0082832	MA-01-04B-03	Pheidole	spinosa	Pheidole.MG154	1w.	pin	R. Harin'Hala	2001-02-15	Antsiranana	Madagascar	10 m	-12.2697	49.3917	Malagasy	CASC, San Francisco, CA, USA	CASC
CASENT0082862	MA-01-04B-03	Pheidole	spinosa	Pheidole.MG146	1w.	pin	R. Harin'Hala	2001-02-15	Antsiranana	Madagascar	10 m	-12.2697	49.3917	Malagasy	CASC, San Francisco, CA, USA	CASC
CASENT0082899	MA-01-04B-11	Pheidole	spinosa	Pheidole.MG151	1w.	pin	R. Harin'Hala	2001-05-31	Antsiranana	Madagascar	10 m	-12.2697	49.3917	Malagasy	CASC, San Francisco, CA, USA	CASC
CASENT0082952	MA-01-04B-11	Pheidole	spinosa	Pheidole.MG155	1w.	pin	R. Harin'Hala	2001-05-31	Antsiranana	Madagascar	10 m	-12.2697	49.3917	Malagasy	CASC, San Francisco, CA, USA	CASC
CASENT0083264	MA-01-07-10	Pheidole	spinosa	Pheidole.MG145	1w.	pin	R. Harin'Hala	2001-04-07	Diego-Suarez	Madagascar	360 m	-12.3333	49.25	Malagasy	CASC, San Francisco, CA, USA	CASC
CASENT0083272	MA-01-07-10	Pheidole	spinosa	Pheidole.MG146	1w.	pin	R. Harin'Hala	2001-04-07	Diego-Suarez	Madagascar	360 m	-12.3333	49.25	Malagasy	CASC, San Francisco, CA, USA	CASC
CASENT0083963	MA-01-04B-14	Pheidole	spinosa	Pheidole.MG151	1w.	pin	R. Harin'Hala	2001-07-06	Antsiranana	Madagascar	10 m	-12.2697	49.3917	Malagasy	CASC, San Francisco, CA, USA	CASC
CASENT0083972	MA-01-04B-14	Pheidole	spinosa	Pheidole.MG154	1w.	pin	R. Harin'Hala	2001-07-06	Antsiranana	Madagascar	10 m	-12.2697	49.3917	Malagasy	CASC, San Francisco, CA, USA	CASC
CASENT0084258	MA-01-01D-03	Pheidole	spinosa	Pheidole.MG150	1w.	pin	R. Harin'Hala	2001-01-29	Diego-Suarez	Madagascar	1125 m	-12.5333	49.1667	Malagasy	CASC, San Francisco, CA, USA	CASC
CASENT0084287	MA-01-01D-05	Pheidole	spinosa	Pheidole.MG155	1w.	pin	R. Harin'Hala	2001-03-04	Diego-Suarez	Madagascar	1125 m	-12.5333	49.1667	Malagasy	CASC, San Francisco, CA, USA	CASC
CASENT0084347	MA-01-01D-05	Pheidole	spinosa	Pheidole.MG146	1w.	pin	R. Harin'Hala	2001-03-04	Diego-Suarez	Madagascar	1125 m	-12.5333	49.1667	Malagasy	CASC, San Francisco, CA, USA	CASC
CASENT0084434	MA-01-01D-12	Pheidole	spinosa	Pheidole.MG151	1w.	pin	R. Harin'Hala	2001-05-30	Diego-Suarez	Madagascar	1125 m	-12.5333	49.1667	Malagasy	CASC, San Francisco, CA, USA	CASC
CASENT0084446	MA-01-01D-12	Pheidole	spinosa	Pheidole.MG146	1w.	pin	R. Harin'Hala	2001-05-30	Diego-Suarez	Madagascar	1125 m	-12.5333	49.1667	Malagasy	CASC, San Francisco, CA, USA	CASC
CASENT0084447	MA-01-01D-12	Pheidole	spinosa	Pheidole.MG154	1w.	pin	R. Harin'Hala	2001-05-30	Diego-Suarez	Madagascar	1125 m	-12.5333	49.1667	Malagasy	CASC, San Francisco, CA, USA	CASC
CASENT0084583	MA-01-01D-07	Pheidole	spinosa	Pheidole.MG145	1w.	pin	R. Harin'Hala	2001-04-05	Diego-Suarez	Madagascar	1125 m	-12.5333	49.1667	Malagasy	CASC, San Francisco, CA, USA	CASC
CASENT0084584	MA-01-01D-07	Pheidole	spinosa	Pheidole.MG151	1w.	pin	R. Harin'Hala	2001-04-05	Diego-Suarez	Madagascar	1125 m	-12.5333	49.1667	Malagasy	CASC, San Francisco, CA, USA	CASC
CASENT0084586	MA-01-01D-07	Pheidole	spinosa	Pheidole.MG151	1w.	pin	R. Harin'Hala	2001-04-05	Diego-Suarez	Madagascar	1125 m	-12.5333	49.1667	Malagasy	CASC, San Francisco, CA, USA	CASC
CASENT0084604	MA-01-01D-10	Pheidole	spinosa	Pheidole.MG148	1w.	pin	R. Harin'Hala	2001-05-12	Diego-Suarez	Madagascar	1125 m	-12.5333	49.1667	Malagasy	CASC, San Francisco, CA, USA	CASC
CASENT0084606	MA-01-01D-10	Pheidole	spinosa	Pheidole.MG145	1w.	pin	R. Harin'Hala	2001-05-12	Diego-Suarez	Madagascar	1125 m	-12.5333	49.1667	Malagasy	CASC, San Francisco, CA, USA	CASC
CASENT0084659	MA-01-01D-11	Pheidole	spinosa	Pheidole.MG151	1w.	pin	R. Harin'Hala	2001-05-14	Diego-Suarez	Madagascar	1125 m	-12.5333	49.1667	Malagasy	CASC, San Francisco, CA, USA	CASC
CASENT0084699	MA-01-04B-08	Pheidole	spinosa	Pheidole.MG151	1w.	pin	R. Harin'Hala	2001-04-27	Antsiranana	Madagascar	10 m	-12.2697	49.3917	Malagasy	CASC, San Francisco, CA, USA	CASC
CASENT0084776	MA-01-07-07	Pheidole	spinosa	Pheidole.MG146	1w.	pin	R. Harin'Hala	2001-02-15	Diego-Suarez	Madagascar	360 m	-12.3333	49.25	Malagasy	CASC, San Francisco, CA, USA	CASC
CASENT0084778	MA-01-07-07	Pheidole	spinosa	Pheidole.MG145	1w.	pin	R. Harin'Hala	2001-02-15	Diego-Suarez	Madagascar	360 m	-12.3333	49.25	Malagasy	CASC, San Francisco, CA, USA	CASC
CASENT0084779	MA-01-07-07	Pheidole	spinosa	Pheidole.MG151	1w.	pin	R. Harin'Hala	2001-02-15	Diego-Suarez	Madagascar	360 m	-12.3333	49.25	Malagasy	CASC, San Francisco, CA, USA	CASC
CASENT0084780	MA-01-07-07	Pheidole	spinosa	Pheidole.MG155	1w.	pin	R. Harin'Hala	2001-02-15	Diego-Suarez	Madagascar	360 m	-12.3333	49.25	Malagasy	CASC, San Francisco, CA, USA	CASC
CASENT0084831	MA-01-01D-03	Pheidole	spinosa	Pheidole.MG151	1w.	pin	R. Harin'Hala	2001-01-29	Diego-Suarez	Madagascar	1125 m	-12.5333	49.1667	Malagasy	CASC, San Francisco, CA, USA	CASC
CASENT0084833	MA-01-01D-03	Pheidole	spinosa	Pheidole.MG146	1w.	pin	R. Harin'Hala	2001-01-29	Diego-Suarez	Madagascar	1125 m	-12.5333	49.1667	Malagasy	CASC, San Francisco, CA, USA	CASC
CASENT0084871	MA-01-04B-10	Pheidole	spinosa	Pheidole.MG151	1w.	pin	R. Harin'Hala	2001-05-16	Antsiranana	Madagascar	10 m	-12.2697	49.3917	Malagasy	CASC, San Francisco, CA, USA	CASC
CASENT0084872	MA-01-04B-10	Pheidole	spinosa	Pheidole.MG145	1w.	pin	R. Harin'Hala	2001-05-16	Antsiranana	Madagascar	10 m	-12.2697	49.3917	Malagasy	CASC, San Francisco, CA, USA	CASC
CASENT0084873	MA-01-04B-10	Pheidole	spinosa	Pheidole.MG146	1w.	pin	R. Harin'Hala	2001-05-16	Antsiranana	Madagascar	10 m	-12.2697	49.3917	Malagasy	CASC, San Francisco, CA, USA	CASC
CASENT0085011	BLF05967	Pheidole	spinosa	Pheidole.MG146	1w.	pin	Fisher-Griswold Arthropod Team	2002-03-06	Toliara	Madagascar	70 m	-22.8022	43.4207	Malagasy	CASC, San Francisco, CA, USA	CASC
CASENT0085118	BLF05761	Pheidole	spinosa	Pheidole.MG154	1w.	pin	Fisher-Griswold Arthropod Team	2002-02-21	Toliara	Madagascar	80 m	-24.6536	43.9967	Malagasy	CASC, San Francisco, CA, USA	CASC
CASENT0085119	BLF05761	Pheidole	spinosa	Pheidole.MGs122	1s.	pin	Fisher-Griswold Arthropod Team	2002-02-21	Toliara	Madagascar	80 m	-24.6536	43.9967	Malagasy	CASC, San Francisco, CA, USA	CASC
CASENT0085215	MA-01-01D-04	Pheidole	spinosa	Pheidole.MG151	1w.	pin	R. Harin'Hala	2001-02-11	Diego-Suarez	Madagascar	1125 m	-12.5333	49.1667	Malagasy	CASC, San Francisco, CA, USA	CASC
CASENT0085319	MA-01-04B-12	Pheidole	spinosa	Pheidole.MG151	1w.	pin	R. Harin'Hala	2001-06-07	Antsiranana	Madagascar	10 m	-12.2697	49.3917	Malagasy	CASC, San Francisco, CA, USA	CASC
CASENT0085320	MA-01-04B-12	Pheidole	spinosa	Pheidole.MG145	1w.	pin	R. Harin'Hala	2001-06-07	Antsiranana	Madagascar	10 m	-12.2697	49.3917	Malagasy	CASC, San Francisco, CA, USA	CASC
CASENT0085445	MA-01-07-12	Pheidole	spinosa	Pheidole.MG146	1w.	pin	R. Harin'Hala	2001-05-13	Diego-Suarez	Madagascar	360 m	-12.3333	49.25	Malagasy	CASC, San Francisco, CA, USA	CASC
CASENT0085449	MA-01-07-12	Pheidole	spinosa	Pheidole.MG154	1w.	pin	R. Harin'Hala	2001-05-13	Diego-Suarez	Madagascar	360 m	-12.3333	49.25	Malagasy	CASC, San Francisco, CA, USA	CASC
CASENT0085451	MA-01-07-12	Pheidole	spinosa	Pheidole.MG151	1w.	pin	R. Harin'Hala	2001-05-13	Diego-Suarez	Madagascar	360 m	-12.3333	49.25	Malagasy	CASC, San Francisco, CA, USA	CASC
CASENT0085498	MA-01-04B-09	Pheidole	spinosa	Pheidole.MG151	1w.	pin	R. Harin'Hala	2001-05-13	Antsiranana	Madagascar	10 m	-12.2697	49.3917	Malagasy	CASC, San Francisco, CA, USA	CASC
CASENT0085499	MA-01-04B-09	Pheidole	spinosa	Pheidole.MG155	1w.	pin	R. Harin'Hala	2001-05-13	Antsiranana	Madagascar	10 m	-12.2697	49.3917	Malagasy	CASC, San Francisco, CA, USA	CASC
CASENT0085595	MA-01-01D-04	Pheidole	spinosa	Pheidole.MG145	1w.	pin	R. Harin'Hala	2001-02-11	Diego-Suarez	Madagascar	1125 m	-12.5333	49.1667	Malagasy	CASC, San Francisco, CA, USA	CASC
CASENT0085967	MA-01-01D-03	Pheidole	spinosa	Pheidole.MG154	1w.	pin	R. Harin'Hala	2001-01-29	Diego-Suarez	Madagascar	1125 m	-12.5333	49.1667	Malagasy	CASC, San Francisco, CA, USA	CASC
CASENT0095880	ANTC2713	Pheidole	spinosa	Pheidole.MGs122	1s.	pin		1999-03-13	Fianarantsoa	Madagascar	1500 m	-20.2667	47.1167	Malagasy	CASC, San Francisco, CA, USA	CASC
CASENT0095881	ANTC2713	Pheidole	spinosa	Pheidole.MGs123	1s.	pin		1999-03-13	Fianarantsoa	Madagascar	1500 m	-20.2667	47.1167	Malagasy	CASC, San Francisco, CA, USA	CASC
CASENT0107016	BLF11637	Pheidole	spinosa	Pheidole.megacephala spinosa	1w., 1s.	pin	B.L.Fisher	2004-12-10	Antsiranana	Madagascar	150 m	-13.4645	48.5517	Malagasy	CASC, San Francisco, CA, USA	CASC
CASENT0107085	BLF11537	Pheidole	spinosa	Pheidole.MGs128	1w., 1s.	pin	B.L.Fisher	2004-12-09	Antsiranana	Madagascar	150 m	-13.4645	48.5517	Malagasy	CASC, San Francisco, CA, USA	CASC
CASENT0107091	BLF11523	Pheidole	spinosa	Pheidole.MG151	1w.	pin	B.L.Fisher	2004-12-09	Antsiranana	Madagascar	150 m	-13.4645	48.5517	Malagasy	CASC, San Francisco, CA, USA	CASC
CASENT0107094	BLF11750	Pheidole	spinosa	Pheidole.MG151	1w.	pin	B.L.Fisher	2004-12-14	Mahajanga	Madagascar	250 m	-15.9627	47.4382	Malagasy	CASC, San Francisco, CA, USA	CASC
CASENT0107190	BLF11596	Pheidole	spinosa	Pheidole.megacephala spinosa	1w.	pin	B.L.Fisher	2004-12-10	Antsiranana	Madagascar	150 m	-13.4645	48.5517	Malagasy	CASC, San Francisco, CA, USA	CASC
CASENT0107424	BLF11318	Pheidole	spinosa	Pheidole.MG151	1w., 1s.	pin	B.L.Fisher	2004-12-04	Antsiranana	Madagascar	225 m	-12.8047	49.3738	Malagasy	CASC, San Francisco, CA, USA	CASC
CASENT0107452	BLF11291	Pheidole	spinosa	Pheidole.MG151	1w., 1m.	pin	B.L.Fisher	2004-12-03	Antsiranana	Madagascar	225 m	-12.8047	49.3738	Malagasy	CASC, San Francisco, CA, USA	CASC
CASENT0107453	BLF11291	Pheidole	spinosa	Pheidole.MG151	1w., 1s.	pin	B.L.Fisher	2004-12-03	Antsiranana	Madagascar	225 m	-12.8047	49.3738	Malagasy	CASC, San Francisco, CA, USA	CASC
CASENT0107480	BLF11897	Pheidole	spinosa	Pheidole.megacephala spinosa	1w., 1s.	pin	B.L.Fisher	2004-12-18	Toamasina	Madagascar	1075 m	-18.8508	48.32	Malagasy	CASC, San Francisco, CA, USA	CASC
CASENT0107679	BLF11561	Pheidole	spinosa	Pheidole.MGs128	1w., 1s.	pin	B.L.Fisher	2004-12-09	Antsiranana	Madagascar	150 m	-13.4645	48.5517	Malagasy	CASC, San Francisco, CA, USA	CASC
CASENT0107826	BLF11785	Pheidole	spinosa	Pheidole.MG154	1w., 1s.	pin	B.L.Fisher	2004-12-15	Mahajanga	Madagascar	250 m	-15.9627	47.4382	Malagasy	CASC, San Francisco, CA, USA	CASC
CASENT0107887	BLF11276	Pheidole	spinosa	Pheidole.MG151	1w.	pin	B.L.Fisher	2004-12-03	Antsiranana	Madagascar	225 m	-12.8047	49.3738	Malagasy	CASC, San Francisco, CA, USA	CASC
CASENT0107891	BLF11276	Pheidole	spinosa	Pheidole.MGs122	1s.	pin	B.L.Fisher	2004-12-03	Antsiranana	Madagascar	225 m	-12.8047	49.3738	Malagasy	CASC, San Francisco, CA, USA	CASC
CASENT0107893	BLF11276	Pheidole	spinosa	Pheidole.MG154	1w.	pin	B.L.Fisher	2004-12-03	Antsiranana	Madagascar	225 m	-12.8047	49.3738	Malagasy	CASC, San Francisco, CA, USA	CASC
CASENT0107908	BLF11276	Pheidole	spinosa	Pheidole.MGs128	1s.	pin	B.L.Fisher	2004-12-03	Antsiranana	Madagascar	225 m	-12.8047	49.3738	Malagasy	CASC, San Francisco, CA, USA	CASC
CASENT0107914	BLF11276	Pheidole	spinosa	Pheidole.MGs122	1s.	pin	B.L.Fisher	2004-12-03	Antsiranana	Madagascar	225 m	-12.8047	49.3738	Malagasy	CASC, San Francisco, CA, USA	CASC
CASENT0107923	BLF11152	Pheidole	spinosa	Pheidole.MG151	1w., 1s.	pin	B.L.Fisher	2004-11-30	Antsiranana	Madagascar	10 m	-13.7153	50.1017	Malagasy	CASC, San Francisco, CA, USA	CASC
CASENT0107924	BLF11152	Pheidole	spinosa	Pheidole.megacephala	1w., 1q.	pin	B.L.Fisher	2004-11-30	Antsiranana	Madagascar	10 m	-13.7153	50.1017	Malagasy	CASC, San Francisco, CA, USA	CASC
CASENT0107967	BLF11192	Pheidole	spinosa	Pheidole.MG151	1w., 1s.	pin	B.L.Fisher	2004-11-30	Antsiranana	Madagascar	10 m	-13.7153	50.1017	Malagasy	CASC, San Francisco, CA, USA	CASC
CASENT0107972	BLF11117	Pheidole	spinosa	Pheidole.MG151	1w., 1s.	pin	B.L.Fisher	2004-11-30	Antsiranana	Madagascar	10 m	-13.7153	50.1017	Malagasy	CASC, San Francisco, CA, USA	CASC
CASENT0107980	BLF11177	Pheidole	spinosa	Pheidole.MG151	1w.	pin	B.L.Fisher	2004-11-30	Antsiranana	Madagascar	10 m	-13.7153	50.1017	Malagasy	CASC, San Francisco, CA, USA	CASC
CASENT0108004	BLF14120	Pheidole	spinosa	Pheidole.megacephala	1w.	pin	B.L. Fisher et al.	2006-04-23	Fianarantsoa	Madagascar	600 m	-22.791	47.1818	Malagasy	CASC, San Francisco, CA, USA	CASC
CASENT0108509	BLF13963	Pheidole	spinosa	Pheidole.MG151	1w.	pin	B.L. Fisher et al.	2006-04-20	Fianarantsoa	Madagascar	30 m	-23.0158	47.719	Malagasy	CASC, San Francisco, CA, USA	CASC
CASENT0108515	BLF13963	Pheidole	spinosa	Pheidole.MGs123	1s.	pin	B.L. Fisher et al.	2006-04-20	Fianarantsoa	Madagascar	30 m	-23.0158	47.719	Malagasy	CASC, San Francisco, CA, USA	CASC
CASENT0108533	BLF13758	Pheidole	spinosa	Pheidole.megacephala	1w.	pin	B.L. Fisher et al.	2006-04-15	Fianarantsoa	Madagascar	2000 m	-22.1523	46.8992	Malagasy	CASC, San Francisco, CA, USA	CASC
CASENT0108537	BLF14118	Pheidole	spinosa	Pheidole.megacephala	1w.	pin	B.L. Fisher et al.	2006-04-23	Fianarantsoa	Madagascar	600 m	-22.791	47.1818	Malagasy	CASC, San Francisco, CA, USA	CASC
CASENT0108797	BLF13960	Pheidole	spinosa	Pheidole.megacephala	1w.	pin	B.L. Fisher et al.	2006-04-20	Fianarantsoa	Madagascar	30 m	-23.0158	47.719	Malagasy	CASC, San Francisco, CA, USA	CASC
CASENT0108812	BLF13822	Pheidole	spinosa	Pheidole.megacephala	1w.	pin	B.L. Fisher et al.	2006-04-18	Fianarantsoa	Madagascar	20 m	-23.1938	47.723	Malagasy	CASC, San Francisco, CA, USA	CASC
CASENT0109268	MA-02-18A-09	Pheidole	spinosa	Pheidole.MGs120	1s.	pin	R. Harin'Hala	2002-01-06	Tulear	Madagascar	30 m	-22.9037	43.4755	Malagasy	CASC, San Francisco, CA, USA	CASC
CASENT0109269	MA-02-18A-09	Pheidole	spinosa	Pheidole.MG154	1w.	pin	R. Harin'Hala	2002-01-06	Tulear	Madagascar	30 m	-22.9037	43.4755	Malagasy	CASC, San Francisco, CA, USA	CASC
CASENT0109309	MA-02-13A-48	Pheidole	spinosa	Pheidole.MG154	1w.	pin	R. Harin'Hala	2003-01-20	Tulear	Madagascar	840 m	-22.8865	44.6922	Malagasy	CASC, San Francisco, CA, USA	CASC
CASENT0109374	MA-02-18A-08	Pheidole	spinosa	Pheidole.MG148	1w.	pin	R. Harin'Hala	2001-12-27	Tulear	Madagascar	30 m	-22.9037	43.4755	Malagasy	CASC, San Francisco, CA, USA	CASC
CASENT0109375	MA-02-18A-08	Pheidole	spinosa	Pheidole.MG154	1w.	pin	R. Harin'Hala	2001-12-27	Tulear	Madagascar	30 m	-22.9037	43.4755	Malagasy	CASC, San Francisco, CA, USA	CASC
CASENT0109425	MA-02-18A-10	Pheidole	spinosa	Pheidole.MGs122	1s.	pin	R. Harin'Hala	2002-01-16	Tulear	Madagascar	30 m	-22.9037	43.4755	Malagasy	CASC, San Francisco, CA, USA	CASC
CASENT0109426	MA-02-18A-10	Pheidole	spinosa	Pheidole.MG148	1w.	pin	R. Harin'Hala	2002-01-16	Tulear	Madagascar	30 m	-22.9037	43.4755	Malagasy	CASC, San Francisco, CA, USA	CASC
CASENT0109455	MA-02-18A-45	Pheidole	spinosa	Pheidole.MG159	1w.	pin	R. Harin'Hala	2003-01-15	Tulear	Madagascar	30 m	-22.9037	43.4755	Malagasy	CASC, San Francisco, CA, USA	CASC
CASENT0109456	MA-02-18A-45	Pheidole	spinosa	Pheidole.MG147	1w.	pin	R. Harin'Hala	2003-01-15	Tulear	Madagascar	30 m	-22.9037	43.4755	Malagasy	CASC, San Francisco, CA, USA	CASC
CASENT0109470	MA-02-18A-44	Pheidole	spinosa	Pheidole.MGs120	1s.	pin	R. Harin'Hala	2003-01-03	Tulear	Madagascar	30 m	-22.9037	43.4755	Malagasy	CASC, San Francisco, CA, USA	CASC
CASENT0109471	MA-02-18A-44	Pheidole	spinosa	Pheidole.MG151	1w.	pin	R. Harin'Hala	2003-01-03	Tulear	Madagascar	30 m	-22.9037	43.4755	Malagasy	CASC, San Francisco, CA, USA	CASC
CASENT0109579	BLF11169	Pheidole	spinosa	Pheidole.MGs123	1w., 1s.	pin	B.L.Fisher	2004-11-30	Antsiranana	Madagascar	10 m	-13.7153	50.1017	Malagasy	CASC, San Francisco, CA, USA	CASC
CASENT0109581	BLF11137	Pheidole	spinosa	Pheidole.MG151	1w., 1s.	pin	B.L.Fisher	2004-11-30	Antsiranana	Madagascar	10 m	-13.7153	50.1017	Malagasy	CASC, San Francisco, CA, USA	CASC
CASENT0109587	BLF11140	Pheidole	spinosa	Pheidole.MG151	1w., 1s.	pin	B.L.Fisher	2004-11-30	Antsiranana	Madagascar	10 m	-13.7153	50.1017	Malagasy	CASC, San Francisco, CA, USA	CASC
CASENT0109736	BLF11184	Pheidole	spinosa	Pheidole.MG150	1w., 1s.	pin	B.L.Fisher	2004-11-30	Antsiranana	Madagascar	10 m	-13.7153	50.1017	Malagasy	CASC, San Francisco, CA, USA	CASC
CASENT0109737	BLF11109	Pheidole	spinosa	Pheidole.MGs128	1w., 1s.	pin	B.L.Fisher	2004-11-30	Antsiranana	Madagascar	10 m	-13.7153	50.1017	Malagasy	CASC, San Francisco, CA, USA	CASC
CASENT0109739	BLF11106	Pheidole	spinosa	Pheidole.MG151	1w.	pin	B.L.Fisher	2004-11-30	Antsiranana	Madagascar	10 m	-13.7153	50.1017	Malagasy	CASC, San Francisco, CA, USA	CASC
CASENT0109834	MA-01-04B-15	Pheidole	spinosa	Pheidole.MG151	1w.	pin	R. Harin'Hala	2001-07-20	Antsiranana	Madagascar	10 m	-12.2697	49.3917	Malagasy	CASC, San Francisco, CA, USA	CASC
CASENT0109964	MA-02-14A-05	Pheidole	spinosa	Pheidole.MG154	1w.	pin	R. Harin'Hala	2001-12-04	Tulear	Madagascar	165 m	-23.6865	44.591	Malagasy	CASC, San Francisco, CA, USA	CASC
CASENT0110348	BLF16586	Pheidole	spinosa	Pheidole.MG147	1w., 1s.	pin	B.L.Fisher et al.	2007-02-09	Antananarivo	Madagascar	1241 m	-18.3162	47.1158	Malagasy	CASC, San Francisco, CA, USA	CASC
CASENT0110395	BLF16435	Pheidole	spinosa	Pheidole.MG147	1w., 1s.	pin	B.L.Fisher et al.	2007-02-03	Toliara	Madagascar	7 m	-20.2965	44.2815	Malagasy	CASC, San Francisco, CA, USA	CASC
CASENT0110610	BLF11824	Pheidole	spinosa	Pheidole.megacephala spinosa	1w., 1s.	pin	B.L.Fisher	2004-12-18	Toamasina	Madagascar	1075 m	-18.8508	48.32	Malagasy	CASC, San Francisco, CA, USA	CASC
CASENT0110662	BLF11268	Pheidole	spinosa	Pheidole.MG151	1w.	pin	B.L.Fisher	2004-12-01	Antsiranana	Madagascar	10 m	-13.7153	50.1017	Malagasy	CASC, San Francisco, CA, USA	CASC
CASENT0110712	MG-23-40	Pheidole	spinosa	Pheidole.MG154	1w.	pin	Rin'ha, Mike	2003-08-31	Toliara	Madagascar	36 m	-25.5877	45.163	Malagasy	CASC, San Francisco, CA, USA	CASC
CASENT0110811	MA-02-11B-23	Pheidole	spinosa	Pheidole.MG159	1w.	pin	R. Harin'Hala	2002-04-07	Fianarantsoa	Madagascar	885 m	-22.6267	45.3582	Malagasy	CASC, San Francisco, CA, USA	CASC
CASENT0110812	MA-02-11B-23	Pheidole	spinosa	Pheidole.MG147	1w.	pin	R. Harin'Hala	2002-04-07	Fianarantsoa	Madagascar	885 m	-22.6267	45.3582	Malagasy	CASC, San Francisco, CA, USA	CASC
CASENT0110844	MA-02-13A-23	Pheidole	spinosa	Pheidole.MG154	1w.	pin	R. Harin'Hala	2002-04-03	Tulear	Madagascar	840 m	-22.8865	44.6922	Malagasy	CASC, San Francisco, CA, USA	CASC
CASENT0110889	MA-02-18B-18	Pheidole	spinosa	Pheidole.MGs120	1s.	pin	R. Harin'Hala	2002-03-28	Tulear	Madagascar	37 m	-22.9133	43.4822	Malagasy	CASC, San Francisco, CA, USA	CASC
CASENT0110890	MA-02-18B-18	Pheidole	spinosa	Pheidole.MG147	1w.	pin	R. Harin'Hala	2002-03-28	Tulear	Madagascar	37 m	-22.9133	43.4822	Malagasy	CASC, San Francisco, CA, USA	CASC
CASENT0110916	MA-02-13A-24	Pheidole	spinosa	Pheidole.MG154	1w.	pin	R. Harin'Hala	2002-04-11	Tulear	Madagascar	840 m	-22.8865	44.6922	Malagasy	CASC, San Francisco, CA, USA	CASC
CASENT0110917	MA-02-13A-24	Pheidole	spinosa	Pheidole.MG154	1w.	pin	R. Harin'Hala	2002-04-11	Tulear	Madagascar	840 m	-22.8865	44.6922	Malagasy	CASC, San Francisco, CA, USA	CASC
CASENT0111032	MA-02-11A-52	Pheidole	spinosa	Pheidole.MG155	1w.	pin	R. Harin'Hala	2003-01-02	Fianarantsoa	Madagascar	750 m	-22.6267	45.3582	Malagasy	CASC, San Francisco, CA, USA	CASC
CASENT0111075	MA-02-11B-12	Pheidole	spinosa	Pheidole.MG147	1w.	pin	R. Harin'Hala	2002-01-19	Fianarantsoa	Madagascar	885 m	-22.6267	45.3582	Malagasy	CASC, San Francisco, CA, USA	CASC
CASENT0111099	MA-02-13A-47	Pheidole	spinosa	Pheidole.MGs127	1s.	pin	R. Harin'Hala	2003-01-04	Tulear	Madagascar	840 m	-22.8865	44.6922	Malagasy	CASC, San Francisco, CA, USA	CASC
CASENT0111100	MA-02-13A-47	Pheidole	spinosa	Pheidole.MG154	1w.	pin	R. Harin'Hala	2003-01-04	Tulear	Madagascar	840 m	-22.8865	44.6922	Malagasy	CASC, San Francisco, CA, USA	CASC
CASENT0111118	MA-02-11B-13	Pheidole	spinosa	Pheidole.MG155	1w.	pin	R. Harin'Hala	2002-01-26	Fianarantsoa	Madagascar	885 m	-22.6267	45.3582	Malagasy	CASC, San Francisco, CA, USA	CASC
CASENT0111250	MA-02-11A-53	Pheidole	spinosa	Pheidole.MG154	1w.	pin	R. Harin'Hala	2003-01-22	Fianarantsoa	Madagascar	750 m	-22.6267	45.3582	Malagasy	CASC, San Francisco, CA, USA	CASC
CASENT0111331	MA-02-11B-11	Pheidole	spinosa	Pheidole.MG147	1w.	pin	R. Harin'Hala	2002-01-13	Fianarantsoa	Madagascar	885 m	-22.6267	45.3582	Malagasy	CASC, San Francisco, CA, USA	CASC
CASENT0111806	MG-31-13	Pheidole	spinosa	Pheidole.megacephala	1w.	pin	Rin'Ha, Mike	2005-02-25	Antsiranana	Madagascar	487 m	-14.4382	49.774	Malagasy	CASC, San Francisco, CA, USA	CASC
CASENT0111810	MG-31-22	Pheidole	spinosa	Pheidole.megacephala	1w.	pin	Rin'Ha, Mike	2005-05-18	Antsiranana	Madagascar	487 m	-14.4382	49.774	Malagasy	CASC, San Francisco, CA, USA	CASC
CASENT0111815	MG-31-23	Pheidole	spinosa	Pheidole.megacephala	1w.	pin	Rin'Ha, Mike	2005-05-30	Antsiranana	Madagascar	487 m	-14.4382	49.774	Malagasy	CASC, San Francisco, CA, USA	CASC
CASENT0111823	MG-31-32	Pheidole	spinosa	Pheidole.megacephala	1w.	pin	Rin'Ha, Mike	2005-09-26	Antsiranana	Madagascar	487 m	-14.4382	49.774	Malagasy	CASC, San Francisco, CA, USA	CASC
CASENT0112387	MA-02-09C-08	Pheidole	spinosa	Pheidole.MG155	1w.	pin	R. Harin'Hala	2001-12-21	Fianarantsoa	Madagascar	1020 m	-21.2665	47.4202	Malagasy	CASC, San Francisco, CA, USA	CASC
CASENT0112522	MG-31-27	Pheidole	spinosa	Pheidole.megacephala	1w.	pin	Rin'Ha, Mike	2005-07-28	Antsiranana	Madagascar	487 m	-14.4382	49.774	Malagasy	CASC, San Francisco, CA, USA	CASC
CASENT0112530	MG-31-29	Pheidole	spinosa	Pheidole.megacephala	1w.	pin	Rin'Ha, Mike	2005-08-28	Antsiranana	Madagascar	487 m	-14.4382	49.774	Malagasy	CASC, San Francisco, CA, USA	CASC
CASENT0113094	MG-31-34	Pheidole	spinosa	Pheidole.megacephala	1w.	pin	Rin'Ha, Mike	2005-10-14	Antsiranana	Madagascar	487 m	-14.4382	49.774	Malagasy	CASC, San Francisco, CA, USA	CASC
CASENT0114272	MG-23-20	Pheidole	spinosa	Pheidole.MG154	1w.	pin	Rin'ha, Mike	2003-03-17	Toliara	Madagascar	36 m	-25.5877	45.163	Malagasy	CASC, San Francisco, CA, USA	CASC
CASENT0114803	BLF16915	Pheidole	spinosa	Pheidole.MG156	1w.	pin	B.L.Fisher et al.	2007-03-03	Toamasina	Madagascar	1010 m	-18.8496	48.2947	Malagasy	CASC, San Francisco, CA, USA	CASC
CASENT0114933	MA-02-11B-35	Pheidole	spinosa	Pheidole.MG147	1w.	pin	R. Harin'Hala	2002-07-10	Fianarantsoa	Madagascar	885 m	-22.6267	45.3582	Malagasy	CASC, San Francisco, CA, USA	CASC
CASENT0115188	MG-23-24	Pheidole	spinosa	Pheidole.MG154	1w.	pin	Rin'ha, Mike	2003-04-20	Toliara	Madagascar	36 m	-25.5877	45.163	Malagasy	CASC, San Francisco, CA, USA	CASC
CASENT0115219	MG-23-25	Pheidole	spinosa	Pheidole.MG154	1w.	pin	Rin'ha, Mike	2003-04-30	Toliara	Madagascar	36 m	-25.5877	45.163	Malagasy	CASC, San Francisco, CA, USA	CASC
CASENT0115220	MG-23-25	Pheidole	spinosa	Pheidole.MGs122	1s.	pin	Rin'ha, Mike	2003-04-30	Toliara	Madagascar	36 m	-25.5877	45.163	Malagasy	CASC, San Francisco, CA, USA	CASC
CASENT0115238	MG-23-26	Pheidole	spinosa	Pheidole.MG154	1w.	pin	Rin'ha, Mike	2003-05-11	Toliara	Madagascar	36 m	-25.5877	45.163	Malagasy	CASC, San Francisco, CA, USA	CASC
CASENT0115239	MG-23-26	Pheidole	spinosa	Pheidole.MG155	1w.	pin	Rin'ha, Mike	2003-05-11	Toliara	Madagascar	36 m	-25.5877	45.163	Malagasy	CASC, San Francisco, CA, USA	CASC
CASENT0115264	MG-23-27	Pheidole	spinosa	Pheidole.MG154	1w.	pin	Rin'ha, Mike	2003-05-18	Toliara	Madagascar	36 m	-25.5877	45.163	Malagasy	CASC, San Francisco, CA, USA	CASC
CASENT0115289	MG-23-34	Pheidole	spinosa	Pheidole.MG154	1w.	pin	Rin'ha, Mike	2003-07-05	Toliara	Madagascar	36 m	-25.5877	45.163	Malagasy	CASC, San Francisco, CA, USA	CASC
CASENT0115299	MG-23-35	Pheidole	spinosa	Pheidole.MG154	1w.	pin	Rin'ha, Mike	2003-07-13	Toliara	Madagascar	36 m	-25.5877	45.163	Malagasy	CASC, San Francisco, CA, USA	CASC
CASENT0115357	MA-02-13A-25	Pheidole	spinosa	Pheidole.MG154	1w.	pin	R. Harin'Hala	2002-04-16	Tulear	Madagascar	840 m	-22.8865	44.6922	Malagasy	CASC, San Francisco, CA, USA	CASC
CASENT0115411	MA-02-09C-22	Pheidole	spinosa	Pheidole.MG147	1w.	pin	R. Harin'Hala	2002-03-26	Fianarantsoa	Madagascar	1020 m	-21.2665	47.4202	Malagasy	CASC, San Francisco, CA, USA	CASC
CASENT0115619	MG-23-07	Pheidole	spinosa	Pheidole.MG154	1w.	pin	Rin'ha, Mike	2002-12-02	Toliara	Madagascar	36 m	-25.5877	45.163	Malagasy	CASC, San Francisco, CA, USA	CASC
CASENT0115635	MG-23-06	Pheidole	spinosa	Pheidole.MG150	1w.	pin	Rin'ha, Mike	2002-11-25	Toliara	Madagascar	36 m	-25.5877	45.163	Malagasy	CASC, San Francisco, CA, USA	CASC
CASENT0115636	MG-23-06	Pheidole	spinosa	Pheidole.MG154	1w.	pin	Rin'ha, Mike	2002-11-25	Toliara	Madagascar	36 m	-25.5877	45.163	Malagasy	CASC, San Francisco, CA, USA	CASC
CASENT0115667	MG-23-18	Pheidole	spinosa	Pheidole.MG154	1w.	pin	Rin'ha, Mike	2003-02-25	Toliara	Madagascar	36 m	-25.5877	45.163	Malagasy	CASC, San Francisco, CA, USA	CASC
CASENT0115693	MG-23-22	Pheidole	spinosa	Pheidole.MG154	1w.	pin	Rin'ha, Mike	2003-04-08	Toliara	Madagascar	36 m	-25.5877	45.163	Malagasy	CASC, San Francisco, CA, USA	CASC
CASENT0115723	MG-23-33	Pheidole	spinosa	Pheidole.MG154	1w.	pin	Rin'ha, Mike	2003-06-29	Toliara	Madagascar	36 m	-25.5877	45.163	Malagasy	CASC, San Francisco, CA, USA	CASC
CASENT0115785	MG-23-09	Pheidole	spinosa	Pheidole.MGs122	1s.	pin	Rin'ha, Mike	2002-12-15	Toliara	Madagascar	36 m	-25.5877	45.163	Malagasy	CASC, San Francisco, CA, USA	CASC
CASENT0115786	MG-23-09	Pheidole	spinosa	Pheidole.MG154	1w.	pin	Rin'ha, Mike	2002-12-15	Toliara	Madagascar	36 m	-25.5877	45.163	Malagasy	CASC, San Francisco, CA, USA	CASC
CASENT0115819	MG-23-10	Pheidole	spinosa	Pheidole.MG154	1w.	pin	Rin'ha, Mike	2002-12-23	Toliara	Madagascar	36 m	-25.5877	45.163	Malagasy	CASC, San Francisco, CA, USA	CASC
CASENT0115823	MG-23-16	Pheidole	spinosa	Pheidole.MG154	1w.	pin	Rin'ha, Mike	2003-02-05	Toliara	Madagascar	36 m	-25.5877	45.163	Malagasy	CASC, San Francisco, CA, USA	CASC
CASENT0115836	MG-23-30	Pheidole	spinosa	Pheidole.MGs122	1s.	pin	Rin'ha, Mike	2003-06-10	Toliara	Madagascar	36 m	-25.5877	45.163	Malagasy	CASC, San Francisco, CA, USA	CASC
CASENT0115847	MG-23-29	Pheidole	spinosa	Pheidole.MG154	1w.	pin	Rin'ha, Mike	2003-06-02	Toliara	Madagascar	36 m	-25.5877	45.163	Malagasy	CASC, San Francisco, CA, USA	CASC
CASENT0115899	MG-23-03	Pheidole	spinosa	Pheidole.MG154	1w.	pin	Rin'ha, Mike	2002-11-04	Toliara	Madagascar	36 m	-25.5877	45.163	Malagasy	CASC, San Francisco, CA, USA	CASC
CASENT0115903	MG-23-05	Pheidole	spinosa	Pheidole.MG154	1w.	pin	Rin'ha, Mike	2002-11-18	Toliara	Madagascar	36 m	-25.5877	45.163	Malagasy	CASC, San Francisco, CA, USA	CASC
CASENT0115932	MG-23-08	Pheidole	spinosa	Pheidole.MG154	1w.	pin	Rin'ha, Mike	2002-12-09	Toliara	Madagascar	36 m	-25.5877	45.163	Malagasy	CASC, San Francisco, CA, USA	CASC
CASENT0115955	MG-23-12	Pheidole	spinosa	Pheidole.MG154	1w.	pin	Rin'ha, Mike	2003-01-07	Toliara	Madagascar	36 m	-25.5877	45.163	Malagasy	CASC, San Francisco, CA, USA	CASC
CASENT0115961	MG-23-13	Pheidole	spinosa	Pheidole.MG154	1w.	pin	Rin'ha, Mike	2003-01-14	Toliara	Madagascar	36 m	-25.5877	45.163	Malagasy	CASC, San Francisco, CA, USA	CASC
CASENT0115965	MG-23-15	Pheidole	spinosa	Pheidole.MG154	1w.	pin	Rin'ha, Mike	2003-01-28	Toliara	Madagascar	36 m	-25.5877	45.163	Malagasy	CASC, San Francisco, CA, USA	CASC
CASENT0115973	MG-23-14	Pheidole	spinosa	Pheidole.MG158	1w.	pin	Rin'ha, Mike	2003-01-21	Toliara	Madagascar	36 m	-25.5877	45.163	Malagasy	CASC, San Francisco, CA, USA	CASC
CASENT0115983	MG-23-17	Pheidole	spinosa	Pheidole.MGs122	1s.	pin	Rin'ha, Mike	2003-02-15	Toliara	Madagascar	36 m	-25.5877	45.163	Malagasy	CASC, San Francisco, CA, USA	CASC
CASENT0115984	MG-23-17	Pheidole	spinosa	Pheidole.MG154	1w.	pin	Rin'ha, Mike	2003-02-15	Toliara	Madagascar	36 m	-25.5877	45.163	Malagasy	CASC, San Francisco, CA, USA	CASC
CASENT0115993	MG-23-19	Pheidole	spinosa	Pheidole.MG158	1w.	pin	Rin'ha, Mike	2003-03-07	Toliara	Madagascar	36 m	-25.5877	45.163	Malagasy	CASC, San Francisco, CA, USA	CASC
CASENT0116524	MG-23-23	Pheidole	spinosa	Pheidole.MG155	1w.	pin	Rin'ha, Mike	2003-04-11	Toliara	Madagascar	36 m	-25.5877	45.163	Malagasy	CASC, San Francisco, CA, USA	CASC
CASENT0116533	MG-23-21	Pheidole	spinosa	Pheidole.MG154	1w.	pin	Rin'ha, Mike	2003-03-27	Toliara	Madagascar	36 m	-25.5877	45.163	Malagasy	CASC, San Francisco, CA, USA	CASC
CASENT0116589	MA-02-11A-24	Pheidole	spinosa	Pheidole.MG159	1w.	pin	R. Harin'Hala	2002-04-15	Fianarantsoa	Madagascar	750 m	-22.6267	45.3582	Malagasy	CASC, San Francisco, CA, USA	CASC
CASENT0116619	MA-02-11A-58	Pheidole	spinosa	Pheidole.MG151	1w.	pin	R. Harin'Hala	2003-03-17	Fianarantsoa	Madagascar	750 m	-22.6267	45.3582	Malagasy	CASC, San Francisco, CA, USA	CASC
CASENT0116651	MA-02-11B-60	Pheidole	spinosa	Pheidole.MGs123	1s.	pin	R. Harin'Hala	2003-03-28	Fianarantsoa	Madagascar	885 m	-22.6267	45.3582	Malagasy	CASC, San Francisco, CA, USA	CASC
CASENT0116652	MA-02-11B-60	Pheidole	spinosa	Pheidole.MG158	1w.	pin	R. Harin'Hala	2003-03-28	Fianarantsoa	Madagascar	885 m	-22.6267	45.3582	Malagasy	CASC, San Francisco, CA, USA	CASC
CASENT0116653	MA-02-11B-60	Pheidole	spinosa	Pheidole.MG148	1w.	pin	R. Harin'Hala	2003-03-28	Fianarantsoa	Madagascar	885 m	-22.6267	45.3582	Malagasy	CASC, San Francisco, CA, USA	CASC
CASENT0116694	MG-23-31	Pheidole	spinosa	Pheidole.MG158	1w.	pin	Rin'ha, Mike	2003-06-14	Toliara	Madagascar	36 m	-25.5877	45.163	Malagasy	CASC, San Francisco, CA, USA	CASC
CASENT0116711	MG-23-28	Pheidole	spinosa	Pheidole.MG154	1w.	pin	Rin'ha, Mike	2003-05-26	Toliara	Madagascar	36 m	-25.5877	45.163	Malagasy	CASC, San Francisco, CA, USA	CASC
CASENT0116742	MG-23-11	Pheidole	spinosa	Pheidole.MG154	1w.	pin	Rin'ha, Mike	2002-12-30	Toliara	Madagascar	36 m	-25.5877	45.163	Malagasy	CASC, San Francisco, CA, USA	CASC
CASENT0116754	MA-02-11B-22	Pheidole	spinosa	Pheidole.MG147	1w.	pin	R. Harin'Hala	2002-03-30	Fianarantsoa	Madagascar	885 m	-22.6267	45.3582	Malagasy	CASC, San Francisco, CA, USA	CASC
CASENT0116799	MA-02-11B-56	Pheidole	spinosa	Pheidole.MG147	1w.	pin	R. Harin'Hala	2003-02-12	Fianarantsoa	Madagascar	885 m	-22.6267	45.3582	Malagasy	CASC, San Francisco, CA, USA	CASC
CASENT0117076	MG-29-02	Pheidole	spinosa	Pheidole.MG147	1w.	pin	Rin'ha, Mike	2004-10-23	Fianarantsoa	Madagascar	822 m	-20.7927	47.1757	Malagasy	CASC, San Francisco, CA, USA	CASC
CASENT0117077	MG-29-02	Pheidole	spinosa	Pheidole.MGs131	1s.	pin	Rin'ha, Mike	2004-10-23	Fianarantsoa	Madagascar	822 m	-20.7927	47.1757	Malagasy	CASC, San Francisco, CA, USA	CASC
CASENT0117129	MA-02-11B-44	Pheidole	spinosa	Pheidole.MG155	1w.	pin	R. Harin'Hala	2002-10-31	Fianarantsoa	Madagascar	885 m	-22.6267	45.3582	Malagasy	CASC, San Francisco, CA, USA	CASC
CASENT0117274	MA-02-11B-03	Pheidole	spinosa	Pheidole.MG147	1w.	pin	R. Harin'Hala	2001-11-17	Fianarantsoa	Madagascar	885 m	-22.6267	45.3582	Malagasy	CASC, San Francisco, CA, USA	CASC
CASENT0117311	MG-23-38	Pheidole	spinosa	Pheidole.MG158	1w.	pin	Rin'ha, Mike	2003-08-10	Toliara	Madagascar	36 m	-25.5877	45.163	Malagasy	CASC, San Francisco, CA, USA	CASC
CASENT0117329	MA-02-11B-40	Pheidole	spinosa	Pheidole.MG154	1w.	pin	R. Harin'Hala	2002-09-22	Fianarantsoa	Madagascar	885 m	-22.6267	45.3582	Malagasy	CASC, San Francisco, CA, USA	CASC
CASENT0117382	MA-02-13A-41	Pheidole	spinosa	Pheidole.MG155	1w.	pin	R. Harin'Hala	2002-09-24	Tulear	Madagascar	840 m	-22.8865	44.6922	Malagasy	CASC, San Francisco, CA, USA	CASC
CASENT0117539	MA-02-11B-42	Pheidole	spinosa	Pheidole.MG147	1w.	pin	R. Harin'Hala	2002-10-17	Fianarantsoa	Madagascar	885 m	-22.6267	45.3582	Malagasy	CASC, San Francisco, CA, USA	CASC
CASENT0117663	MA-02-11A-43	Pheidole	spinosa	Pheidole.MG154	1w.	pin	R. Harin'Hala	2002-10-25	Fianarantsoa	Madagascar	750 m	-22.6267	45.3582	Malagasy	CASC, San Francisco, CA, USA	CASC
CASENT0117844	MA-02-11B-14	Pheidole	spinosa	Pheidole.MG154	1w.	pin	R. Harin'Hala	2002-02-03	Fianarantsoa	Madagascar	885 m	-22.6267	45.3582	Malagasy	CASC, San Francisco, CA, USA	CASC
CASENT0117912	MA-02-11B-41	Pheidole	spinosa	Pheidole.MGs120	1s.	pin	R. Harin'Hala	2002-10-03	Fianarantsoa	Madagascar	885 m	-22.6267	45.3582	Malagasy	CASC, San Francisco, CA, USA	CASC
CASENT0117913	MA-02-11B-41	Pheidole	spinosa	Pheidole.MG146	1w.	pin	R. Harin'Hala	2002-10-03	Fianarantsoa	Madagascar	885 m	-22.6267	45.3582	Malagasy	CASC, San Francisco, CA, USA	CASC
CASENT0117914	MA-02-11B-41	Pheidole	spinosa	Pheidole.MG155	1w.	pin	R. Harin'Hala	2002-10-03	Fianarantsoa	Madagascar	885 m	-22.6267	45.3582	Malagasy	CASC, San Francisco, CA, USA	CASC
CASENT0117943	MA-02-13A-01	Pheidole	spinosa	Pheidole.MG154	1w.	pin	R. Harin'Hala	2001-10-15	Tulear	Madagascar	840 m	-22.8865	44.6922	Malagasy	CASC, San Francisco, CA, USA	CASC
CASENT0117969	MA-02-13A-43	Pheidole	spinosa	Pheidole.MG155	1w.	pin	R. Harin'Hala	2002-10-31	Tulear	Madagascar	840 m	-22.8865	44.6922	Malagasy	CASC, San Francisco, CA, USA	CASC
CASENT0117970	MA-02-13A-43	Pheidole	spinosa	Pheidole.MGs127	1s.	pin	R. Harin'Hala	2002-10-31	Tulear	Madagascar	840 m	-22.8865	44.6922	Malagasy	CASC, San Francisco, CA, USA	CASC
CASENT0118991	MG-29-10	Pheidole	spinosa	Pheidole.MGs131	1s.	pin	Rin'ha, Mike	2005-02-22	Fianarantsoa	Madagascar	822 m	-20.7927	47.1757	Malagasy	CASC, San Francisco, CA, USA	CASC
CASENT0119631	BLF16106	Pheidole	spinosa	Pheidole.MG147	1w.	pin	B.L.Fisher et al.	2006-12-11	Toliara	Madagascar	470 m	-22.9123	44.5328	Malagasy	CASC, San Francisco, CA, USA	CASC
CASENT0119639	BLF16110	Pheidole	spinosa	Pheidole.MG147	1w.	pin	B.L.Fisher et al.	2006-12-11	Toliara	Madagascar	470 m	-22.9123	44.5328	Malagasy	CASC, San Francisco, CA, USA	CASC
CASENT0119686	BLF16105	Pheidole	spinosa	Pheidole.MG147	1w., 1s.	pin	B.L.Fisher et al.	2006-12-11	Toliara	Madagascar	470 m	-22.9123	44.5328	Malagasy	CASC, San Francisco, CA, USA	CASC
CASENT0119687	BLF16104	Pheidole	spinosa	Pheidole.MG147	1w., 1s.	pin	B.L.Fisher et al.	2006-12-11	Toliara	Madagascar	470 m	-22.9123	44.5328	Malagasy	CASC, San Francisco, CA, USA	CASC
CASENT0120053	BLF16109	Pheidole	spinosa	Pheidole.MG147	1w.	pin	B.L.Fisher et al.	2006-12-11	Toliara	Madagascar	470 m	-22.9123	44.5328	Malagasy	CASC, San Francisco, CA, USA	CASC
CASENT0120056	BLF16101	Pheidole	spinosa	Pheidole.megacephala spinosa	1w., 1s.	pin	B.L.Fisher et al.	2006-12-11	Toliara	Madagascar	470 m	-22.9123	44.5328	Malagasy	CASC, San Francisco, CA, USA	CASC
CASENT0120199	BLF15874	Pheidole	spinosa	Pheidole.MG147	1w., 1s.	pin	B.L.Fisher et al.	2006-12-09	Toliara	Madagascar	400 m	-24.0708	46.0753	Malagasy	CASC, San Francisco, CA, USA	CASC
CASENT0120204	BLF15877	Pheidole	spinosa	Pheidole.MG158	1w., 1s.	pin	B.L.Fisher et al.	2006-12-09	Toliara	Madagascar	400 m	-24.0708	46.0753	Malagasy	CASC, San Francisco, CA, USA	CASC
CASENT0120205	BLF15881	Pheidole	spinosa	Pheidole.megacephala spinosa	1w.	pin	B.L.Fisher et al.	2006-12-09	Toliara	Madagascar	400 m	-24.0708	46.0753	Malagasy	CASC, San Francisco, CA, USA	CASC
CASENT0120214	BLF15870	Pheidole	spinosa	Pheidole.MG147	1w., 1s.	pin	B.L.Fisher et al.	2006-12-09	Toliara	Madagascar	400 m	-24.0708	46.0753	Malagasy	CASC, San Francisco, CA, USA	CASC
CASENT0120236	BLF15921	Pheidole	spinosa	Pheidole.MG146	1w.	pin	B.L.Fisher et al.	2006-12-09	Toliara	Madagascar	25 m	-25.0388	46.3835	Malagasy	CASC, San Francisco, CA, USA	CASC
CASENT0120257	BLF15915	Pheidole	spinosa	Pheidole.megacephala	1w., 1s.	pin	B.L.Fisher et al.	2006-12-09	Toliara	Madagascar	25 m	-25.0388	46.3835	Malagasy	CASC, San Francisco, CA, USA	CASC
CASENT0120269	BLF15905	Pheidole	spinosa	Pheidole.MG147	1w.	pin	B.L.Fisher et al.	2006-12-09	Toliara	Madagascar	25 m	-25.0388	46.3835	Malagasy	CASC, San Francisco, CA, USA	CASC
CASENT0120271	BLF15897	Pheidole	spinosa	Pheidole.MG147	1w.	pin	B.L.Fisher et al.	2006-12-09	Toliara	Madagascar	25 m	-25.0388	46.3835	Malagasy	CASC, San Francisco, CA, USA	CASC
CASENT0120347	BLF15418	Pheidole	spinosa	Pheidole.MG146	1w., 1s.	pin	B.L.Fisher et al.	2006-12-01	Toliara	Madagascar	20 m	-25.0388	46.996	Malagasy	CASC, San Francisco, CA, USA	CASC
CASENT0120350	BLF15417	Pheidole	spinosa	Pheidole.megacephala spinosa	1w., 1s.	pin	B.L.Fisher et al.	2006-12-01	Toliara	Madagascar	20 m	-25.0388	46.996	Malagasy	CASC, San Francisco, CA, USA	CASC
CASENT0120351	BLF15428	Pheidole	spinosa	Pheidole.MG150	1w., 1s.	pin	B.L.Fisher et al.	2006-12-01	Toliara	Madagascar	20 m	-25.0388	46.996	Malagasy	CASC, San Francisco, CA, USA	CASC
CASENT0120352	BLF15445	Pheidole	spinosa	Pheidole.MG146	1w., 1s.	pin	B.L.Fisher et al.	2006-12-01	Toliara	Madagascar	20 m	-25.0388	46.996	Malagasy	CASC, San Francisco, CA, USA	CASC
CASENT0120353	BLF15443	Pheidole	spinosa	Pheidole.MG147	1w., 1s.	pin	B.L.Fisher et al.	2006-12-01	Toliara	Madagascar	20 m	-25.0388	46.996	Malagasy	CASC, San Francisco, CA, USA	CASC
CASENT0120354	BLF15439	Pheidole	spinosa	Pheidole.MG155	1w.	pin	B.L.Fisher et al.	2006-12-01	Toliara	Madagascar	20 m	-25.0388	46.996	Malagasy	CASC, San Francisco, CA, USA	CASC
CASENT0120369	BLF15424	Pheidole	spinosa	Pheidole.MG146	1w., 1s.	pin	B.L.Fisher et al.	2006-12-01	Toliara	Madagascar	20 m	-25.0388	46.996	Malagasy	CASC, San Francisco, CA, USA	CASC
CASENT0120378	BLF16158	Pheidole	spinosa	Pheidole.MG147	1w., 1s.	pin	B.L.Fisher et al.	2006-12-12	Fianarantsoa	Madagascar	735 m	-22.4032	46.1292	Malagasy	CASC, San Francisco, CA, USA	CASC
CASENT0120383	BLF16157	Pheidole	spinosa	Pheidole.MG147	1w.	pin	B.L.Fisher et al.	2006-12-12	Fianarantsoa	Madagascar	735 m	-22.4032	46.1292	Malagasy	CASC, San Francisco, CA, USA	CASC
CASENT0120389	BLF16171	Pheidole	spinosa	Pheidole.megacephala	1w., 1s.	pin	B.L.Fisher et al.	2006-12-12	Fianarantsoa	Madagascar	735 m	-22.4032	46.1292	Malagasy	CASC, San Francisco, CA, USA	CASC
CASENT0120390	BLF16155	Pheidole	spinosa	Pheidole.megacephala spinosa	1w., 1s.	pin	B.L.Fisher et al.	2006-12-12	Fianarantsoa	Madagascar	735 m	-22.4032	46.1292	Malagasy	CASC, San Francisco, CA, USA	CASC
CASENT0120391	BLF16161	Pheidole	spinosa	Pheidole.MG147	1w., 1s.	pin	B.L.Fisher et al.	2006-12-12	Fianarantsoa	Madagascar	735 m	-22.4032	46.1292	Malagasy	CASC, San Francisco, CA, USA	CASC
CASENT0120392	BLF16172	Pheidole	spinosa	Pheidole.MG147	1w.	pin	B.L.Fisher et al.	2006-12-12	Fianarantsoa	Madagascar	735 m	-22.4032	46.1292	Malagasy	CASC, San Francisco, CA, USA	CASC
CASENT0120393	BLF16170	Pheidole	spinosa	Pheidole.MG147	1w.	pin	B.L.Fisher et al.	2006-12-12	Fianarantsoa	Madagascar	735 m	-22.4032	46.1292	Malagasy	CASC, San Francisco, CA, USA	CASC
CASENT0120395	BLF16150	Pheidole	spinosa	Pheidole.MG147	2w.	pin	B.L.Fisher et al.	2006-12-12	Fianarantsoa	Madagascar	735 m	-22.4032	46.1292	Malagasy	CASC, San Francisco, CA, USA	CASC
CASENT0120398	BLF16147	Pheidole	spinosa	Pheidole.MG147	1w., 1s.	pin	B.L.Fisher et al.	2006-12-12	Fianarantsoa	Madagascar	735 m	-22.4032	46.1292	Malagasy	CASC, San Francisco, CA, USA	CASC
CASENT0120400	BLF16164	Pheidole	spinosa	Pheidole.megacephala	1w., 1s.	pin	B.L.Fisher et al.	2006-12-12	Fianarantsoa	Madagascar	735 m	-22.4032	46.1292	Malagasy	CASC, San Francisco, CA, USA	CASC
CASENT0120401	BLF16173	Pheidole	spinosa	Pheidole.MG147	1w., 1s.	pin	B.L.Fisher et al.	2006-12-12	Fianarantsoa	Madagascar	735 m	-22.4032	46.1292	Malagasy	CASC, San Francisco, CA, USA	CASC
CASENT0120404	BLF16151	Pheidole	spinosa	Pheidole.megacephala spinosa	1w., 1s.	pin	B.L.Fisher et al.	2006-12-12	Fianarantsoa	Madagascar	735 m	-22.4032	46.1292	Malagasy	CASC, San Francisco, CA, USA	CASC
CASENT0120407	BLF16153	Pheidole	spinosa	Pheidole.MG147	1w.	pin	B.L.Fisher et al.	2006-12-12	Fianarantsoa	Madagascar	735 m	-22.4032	46.1292	Malagasy	CASC, San Francisco, CA, USA	CASC
CASENT0120408	BLF16152	Pheidole	spinosa	Pheidole.MG147	1w.	pin	B.L.Fisher et al.	2006-12-12	Fianarantsoa	Madagascar	735 m	-22.4032	46.1292	Malagasy	CASC, San Francisco, CA, USA	CASC
CASENT0120448	BLF15940	Pheidole	spinosa	Pheidole.MG147	1w., 1s.	pin	B.L.Fisher et al.	2006-12-10	Toliara	Madagascar	30 m	-25.3183	45.4837	Malagasy	CASC, San Francisco, CA, USA	CASC
CASENT0120461	BLF15953	Pheidole	spinosa	Pheidole.MG147	1w., 1s.	pin	B.L.Fisher et al.	2006-12-10	Toliara	Madagascar	30 m	-25.3183	45.4837	Malagasy	CASC, San Francisco, CA, USA	CASC
CASENT0120486	BLF15978	Pheidole	spinosa	Pheidole.MG146	1w., 1s.	pin	B.L.Fisher et al.	2006-12-10	Toliara	Madagascar	268 m	-23.2098	43.9458	Malagasy	CASC, San Francisco, CA, USA	CASC
CASENT0120489	BLF15984	Pheidole	spinosa	Pheidole.MG147	1w., 1s.	pin	B.L.Fisher et al.	2006-12-10	Toliara	Madagascar	268 m	-23.2098	43.9458	Malagasy	CASC, San Francisco, CA, USA	CASC
CASENT0120502	BLF15974	Pheidole	spinosa	Pheidole.MG147	1w.	pin	B.L.Fisher et al.	2006-12-10	Toliara	Madagascar	268 m	-23.2098	43.9458	Malagasy	CASC, San Francisco, CA, USA	CASC
CASENT0120505	BLF15972	Pheidole	spinosa	Pheidole.megacephala	1w.	pin	B.L.Fisher et al.	2006-12-10	Toliara	Madagascar	268 m	-23.2098	43.9458	Malagasy	CASC, San Francisco, CA, USA	CASC
CASENT0120521	BLF16005	Pheidole	spinosa	Pheidole.MG147	1w.	pin	B.L.Fisher et al.	2006-12-10	Toliara	Madagascar	250 m	-24.3505	44.516	Malagasy	CASC, San Francisco, CA, USA	CASC
CASENT0120535	BLF16007	Pheidole	spinosa	Pheidole.MG147	1w., 1s.	pin	B.L.Fisher et al.	2006-12-10	Toliara	Madagascar	250 m	-24.3505	44.516	Malagasy	CASC, San Francisco, CA, USA	CASC
CASENT0120572	BLF16064	Pheidole	spinosa	Pheidole.MG147	1w., 1s.	pin	B.L.Fisher et al.	2006-12-11	Toliara	Madagascar	20 m	-23.3575	43.669	Malagasy	CASC, San Francisco, CA, USA	CASC
CASENT0120576	BLF16069	Pheidole	spinosa	Pheidole.MG147	1w.	pin	B.L.Fisher et al.	2006-12-11	Toliara	Madagascar	20 m	-23.3575	43.669	Malagasy	CASC, San Francisco, CA, USA	CASC
CASENT0120579	BLF15922	Pheidole	spinosa	Pheidole.MG155	1w.	pin	B.L.Fisher et al.	2006-12-09	Toliara	Madagascar	25 m	-25.1775	46.0928	Malagasy	CASC, San Francisco, CA, USA	CASC
CASENT0120584	BLF15927	Pheidole	spinosa	Pheidole.MG148	1w.	pin	B.L.Fisher et al.	2006-12-09	Toliara	Madagascar	25 m	-25.1775	46.0928	Malagasy	CASC, San Francisco, CA, USA	CASC
CASENT0120586	BLF15925	Pheidole	spinosa	Pheidole.MG146	1w.	pin	B.L.Fisher et al.	2006-12-09	Toliara	Madagascar	25 m	-25.1775	46.0928	Malagasy	CASC, San Francisco, CA, USA	CASC
CASENT0120595	BLF16266	Pheidole	spinosa	Pheidole.MG147	1w., 1s.	pin	B.L.Fisher et al.	2007-01-30	Antananarivo	Madagascar	1580 m	-19.387	47.4285	Malagasy	CASC, San Francisco, CA, USA	CASC
CASENT0120609	BLF16279	Pheidole	spinosa	Pheidole.MG147	1w.	pin	B.L.Fisher et al.	2007-01-30	Antananarivo	Madagascar	1580 m	-19.387	47.4285	Malagasy	CASC, San Francisco, CA, USA	CASC
CASENT0120610	BLF16285	Pheidole	spinosa	Pheidole.MG158	1w., 1s.	pin	B.L.Fisher et al.	2007-01-30	Antananarivo	Madagascar	1580 m	-19.387	47.4285	Malagasy	CASC, San Francisco, CA, USA	CASC
CASENT0120611	BLF16289	Pheidole	spinosa	Pheidole.MG147	1w.	pin	B.L.Fisher et al.	2007-01-30	Antananarivo	Madagascar	1580 m	-19.387	47.4285	Malagasy	CASC, San Francisco, CA, USA	CASC
CASENT0120620	BLF16278	Pheidole	spinosa	Pheidole.MG147	1w., 1s.	pin	B.L.Fisher et al.	2007-01-30	Antananarivo	Madagascar	1580 m	-19.387	47.4285	Malagasy	CASC, San Francisco, CA, USA	CASC
CASENT0120624	BLF16271	Pheidole	spinosa	Pheidole.MG158	1w., 1s.	pin	B.L.Fisher et al.	2007-01-30	Antananarivo	Madagascar	1580 m	-19.387	47.4285	Malagasy	CASC, San Francisco, CA, USA	CASC
CASENT0120626	BLF16044	Pheidole	spinosa	Pheidole.MG147	1w., 1s.	pin	B.L.Fisher et al.	2006-12-11	Toliara	Madagascar	270 m	-23.7212	44.3802	Malagasy	CASC, San Francisco, CA, USA	CASC
CASENT0120633	BLF16039	Pheidole	spinosa	Pheidole.MG147	1w., 1s.	pin	B.L.Fisher et al.	2006-12-11	Toliara	Madagascar	270 m	-23.7212	44.3802	Malagasy	CASC, San Francisco, CA, USA	CASC
CASENT0120635	BLF16038	Pheidole	spinosa	Pheidole.MG147	1w., 1s.	pin	B.L.Fisher et al.	2006-12-11	Toliara	Madagascar	270 m	-23.7212	44.3802	Malagasy	CASC, San Francisco, CA, USA	CASC
CASENT0120636	BLF16056	Pheidole	spinosa	Pheidole.MG147	1w., 1s.	pin	B.L.Fisher et al.	2006-12-11	Toliara	Madagascar	270 m	-23.7212	44.3802	Malagasy	CASC, San Francisco, CA, USA	CASC
CASENT0120639	BLF16053	Pheidole	spinosa	Pheidole.MG147	1w., 1s.	pin	B.L.Fisher et al.	2006-12-11	Toliara	Madagascar	270 m	-23.7212	44.3802	Malagasy	CASC, San Francisco, CA, USA	CASC
CASENT0120653	BLF16048	Pheidole	spinosa	Pheidole.MG147	1w., 1s.	pin	B.L.Fisher et al.	2006-12-11	Toliara	Madagascar	270 m	-23.7212	44.3802	Malagasy	CASC, San Francisco, CA, USA	CASC
CASENT0120667	BLF16041	Pheidole	spinosa	Pheidole.MG158	1w.	pin	B.L.Fisher et al.	2006-12-11	Toliara	Madagascar	270 m	-23.7212	44.3802	Malagasy	CASC, San Francisco, CA, USA	CASC
CASENT0120673	BLF16913	Pheidole	spinosa	Pheidole.MG158	1w., 1s.	pin	B.L.Fisher et al.	2007-02-19	Antananarivo	Madagascar	1382 m	-18.928	47.8828	Malagasy	CASC, San Francisco, CA, USA	CASC
CASENT0120830	BLF16093	Pheidole	spinosa	Pheidole.MG148	1w.	pin	B.L.Fisher et al.	2006-12-11	Toliara	Madagascar	20 m	-23.3575	43.669	Malagasy	CASC, San Francisco, CA, USA	CASC
CASENT0120852	BLF16401	Pheidole	spinosa	Pheidole.MG147	1w., 1s.	pin	B.L.Fisher et al.	2007-02-02	Toliara	Madagascar	180 m	-20.3432	45.5957	Malagasy	CASC, San Francisco, CA, USA	CASC
CASENT0120856	BLF16384	Pheidole	spinosa	Pheidole.MG148	1w.	pin	B.L.Fisher et al.	2007-02-02	Toliara	Madagascar	180 m	-20.3432	45.5957	Malagasy	CASC, San Francisco, CA, USA	CASC
CASENT0120868	BLF16383	Pheidole	spinosa	Pheidole.MGs120	1s.	pin	B.L.Fisher et al.	2007-02-02	Toliara	Madagascar	180 m	-20.3432	45.5957	Malagasy	CASC, San Francisco, CA, USA	CASC
CASENT0120879	BLF16386	Pheidole	spinosa	Pheidole.MG147	1w., 1s.	pin	B.L.Fisher et al.	2007-02-02	Toliara	Madagascar	180 m	-20.3432	45.5957	Malagasy	CASC, San Francisco, CA, USA	CASC
CASENT0120886	BLF16368	Pheidole	spinosa	Pheidole.MG158	1w., 1s.	pin	B.L.Fisher et al.	2007-02-02	Toliara	Madagascar	180 m	-20.3432	45.5957	Malagasy	CASC, San Francisco, CA, USA	CASC
CASENT0120979	BLF16663	Pheidole	spinosa	Pheidole.megacephala spinosa	1w., 1q.	pin	B.L.Fisher et al.	2007-02-14	Toamasina	Madagascar	922 m	-18.9442	48.2307	Malagasy	CASC, San Francisco, CA, USA	CASC
CASENT0121257	BLF16917	Pheidole	spinosa	Pheidole.megacephala	1w.	pin	B.L.Fisher et al.	2007-03-04	Toamasina	Madagascar	1080 m	-18.8394	48.3084	Malagasy	CASC, San Francisco, CA, USA	CASC
CASENT0121402	BLF16918	Pheidole	spinosa	Pheidole.megacephala spinosa	1w.	pin	B.L.Fisher et al.	2007-03-05	Toamasina	Madagascar	1000 m	-18.8477	48.2957	Malagasy	CASC, San Francisco, CA, USA	CASC
CASENT0121408	BLF16918	Pheidole	spinosa	Pheidole.megacephala spinosa	1w.	pin	B.L.Fisher et al.	2007-03-05	Toamasina	Madagascar	1000 m	-18.8477	48.2957	Malagasy	CASC, San Francisco, CA, USA	CASC
CASENT0121411	BLF16918	Pheidole	spinosa	Pheidole.megacephala	1w.	pin	B.L.Fisher et al.	2007-03-05	Toamasina	Madagascar	1000 m	-18.8477	48.2957	Malagasy	CASC, San Francisco, CA, USA	CASC
CASENT0121529	BLF15674	Pheidole	spinosa	Pheidole.MG146	1w., 1s.	pin	B.L.Fisher et al.	2006-12-05	Toliara	Madagascar	20 m	-24.9527	47.0025	Malagasy	CASC, San Francisco, CA, USA	CASC
CASENT0121531	BLF15643	Pheidole	spinosa	Pheidole.MG147	1w., 1m.	pin	B.L.Fisher et al.	2006-12-05	Toliara	Madagascar	20 m	-24.9527	47.0025	Malagasy	CASC, San Francisco, CA, USA	CASC
CASENT0121532	BLF15643	Pheidole	spinosa	Pheidole.megacephala	2w.	pin	B.L.Fisher et al.	2006-12-05	Toliara	Madagascar	20 m	-24.9527	47.0025	Malagasy	CASC, San Francisco, CA, USA	CASC
CASENT0121573	BLF15818	Pheidole	spinosa	Pheidole.MG147	1w., 1s.	pin	B.L.Fisher et al.	2006-12-08	Toliara	Madagascar	850 m	-24.239	46.2823	Malagasy	CASC, San Francisco, CA, USA	CASC
CASENT0121600	BLF15804	Pheidole	spinosa	Pheidole.MG147	1w., 1s.	pin	B.L.Fisher et al.	2006-12-08	Toliara	Madagascar	850 m	-24.239	46.2823	Malagasy	CASC, San Francisco, CA, USA	CASC
CASENT0121603	BLF15814	Pheidole	spinosa	Pheidole.MG147	1w., 1s.	pin	B.L.Fisher et al.	2006-12-08	Toliara	Madagascar	850 m	-24.239	46.2823	Malagasy	CASC, San Francisco, CA, USA	CASC
CASENT0121605	BLF15785	Pheidole	spinosa	Pheidole.MG147	1w., 1s.	pin	B.L.Fisher et al.	2006-12-08	Toliara	Madagascar	850 m	-24.239	46.2823	Malagasy	CASC, San Francisco, CA, USA	CASC
CASENT0121606	BLF15813	Pheidole	spinosa	Pheidole.MG010	1w., 1s.	pin	B.L.Fisher et al.	2006-12-08	Toliara	Madagascar	850 m	-24.239	46.2823	Malagasy	CASC, San Francisco, CA, USA	CASC
CASENT0121607	BLF15797	Pheidole	spinosa	Pheidole.MG010	1w., 1s.	pin	B.L.Fisher et al.	2006-12-08	Toliara	Madagascar	850 m	-24.239	46.2823	Malagasy	CASC, San Francisco, CA, USA	CASC
CASENT0121614	BLF15835	Pheidole	spinosa	Pheidole.MG147	1w., 1s.	pin	B.L.Fisher et al.	2006-12-08	Toliara	Madagascar	850 m	-24.239	46.2823	Malagasy	CASC, San Francisco, CA, USA	CASC
CASENT0121679	BLF15712	Pheidole	spinosa	Pheidole.MG147	1w., 1s.	pin	B.L.Fisher et al.	2006-12-07	Toliara	Madagascar	500 m	-24.2407	46.2878	Malagasy	CASC, San Francisco, CA, USA	CASC
CASENT0121713	BLF16450	Pheidole	spinosa	Pheidole.megacephala	1w., 1s.	pin	B.L.Fisher et al.	2007-02-05	Antananarivo	Madagascar	1550 m	-19.866	47.0355	Malagasy	CASC, San Francisco, CA, USA	CASC
CASENT0121736	BLF16454	Pheidole	spinosa	Pheidole.megacephala	1w.	pin	B.L.Fisher et al.	2007-02-05	Antananarivo	Madagascar	1550 m	-19.866	47.0355	Malagasy	CASC, San Francisco, CA, USA	CASC
CASENT0121810	BLF15468	Pheidole	spinosa	Pheidole.MG151	1w., 1s.	pin	B.L.Fisher et al.	2006-12-03	Toliara	Madagascar	200 m	-24.569	47.204	Malagasy	CASC, San Francisco, CA, USA	CASC
CASENT0121825	BLF15774	Pheidole	spinosa	Pheidole.MG147	1w., 1s.	pin	B.L.Fisher et al.	2006-12-07	Toliara	Madagascar	500 m	-24.2407	46.2878	Malagasy	CASC, San Francisco, CA, USA	CASC
CASENT0121826	BLF15774	Pheidole	spinosa	Pheidole.MG147	1w., 1q.	pin	B.L.Fisher et al.	2006-12-07	Toliara	Madagascar	500 m	-24.2407	46.2878	Malagasy	CASC, San Francisco, CA, USA	CASC
CASENT0121829	BLF15724	Pheidole	spinosa	Pheidole.MG147	1w., 1s.	pin	B.L.Fisher et al.	2006-12-07	Toliara	Madagascar	500 m	-24.2407	46.2878	Malagasy	CASC, San Francisco, CA, USA	CASC
CASENT0121856	BLF15861	Pheidole	spinosa	Pheidole.MG147	1w., 1s.	pin	B.L.Fisher et al.	2006-12-09	Toliara	Madagascar	230 m	-24.2333	46.3017	Malagasy	CASC, San Francisco, CA, USA	CASC
CASENT0121868	BLF16091	Pheidole	spinosa	Pheidole.MG148	1w.	pin	B.L.Fisher et al.	2006-12-11	Toliara	Madagascar	20 m	-23.3575	43.669	Malagasy	CASC, San Francisco, CA, USA	CASC
CASENT0121871	BLF16096	Pheidole	spinosa	Pheidole.MG147	1w.	pin	B.L.Fisher et al.	2006-12-11	Toliara	Madagascar	20 m	-23.3575	43.669	Malagasy	CASC, San Francisco, CA, USA	CASC
CASENT0122036	BLF16191	Pheidole	spinosa	Pheidole.MGs124	1s.	pin	B.L.Fisher et al.	2006-12-13	Fianarantsoa	Madagascar	1020 m	-21.8327	46.9387	Malagasy	CASC, San Francisco, CA, USA	CASC
CASENT0122043	BLF16130	Pheidole	spinosa	Pheidole.megacephala	1w.	pin	B.L.Fisher et al.	2006-12-11	Fianarantsoa	Madagascar	845 m	-22.5582	45.414	Malagasy	CASC, San Francisco, CA, USA	CASC
CASENT0122045	BLF16135	Pheidole	spinosa	Pheidole.megacephala	1w.	pin	B.L.Fisher et al.	2006-12-11	Fianarantsoa	Madagascar	845 m	-22.5582	45.414	Malagasy	CASC, San Francisco, CA, USA	CASC
CASENT0122046	BLF16131	Pheidole	spinosa	Pheidole.megacephala	1w.	pin	B.L.Fisher et al.	2006-12-11	Fianarantsoa	Madagascar	845 m	-22.5582	45.414	Malagasy	CASC, San Francisco, CA, USA	CASC
CASENT0122050	BLF16141	Pheidole	spinosa	Pheidole.megacephala	1w.	pin	B.L.Fisher et al.	2006-12-11	Fianarantsoa	Madagascar	845 m	-22.5582	45.414	Malagasy	CASC, San Francisco, CA, USA	CASC
CASENT0122060	BLF16137	Pheidole	spinosa	Pheidole.megacephala	1w.	pin	B.L.Fisher et al.	2006-12-11	Fianarantsoa	Madagascar	845 m	-22.5582	45.414	Malagasy	CASC, San Francisco, CA, USA	CASC
CASENT0122074	BLF16307	Pheidole	spinosa	Pheidole.MGs120	1s.	pin	B.L.Fisher et al.	2007-01-31	Antananarivo	Madagascar	870 m	-19.5797	46.2897	Malagasy	CASC, San Francisco, CA, USA	CASC
CASENT0122075	BLF16307	Pheidole	spinosa	Pheidole.MG150	1w., 1s.	pin	B.L.Fisher et al.	2007-01-31	Antananarivo	Madagascar	870 m	-19.5797	46.2897	Malagasy	CASC, San Francisco, CA, USA	CASC
CASENT0122102	BLF16301	Pheidole	spinosa	Pheidole.MG147	1w.	pin	B.L.Fisher et al.	2007-01-31	Antananarivo	Madagascar	870 m	-19.5797	46.2897	Malagasy	CASC, San Francisco, CA, USA	CASC
CASENT0122158	BLF16898	Pheidole	spinosa	Pheidole.megacephala spinosa	1w., 1s.	pin	B.L.Fisher et al.	2007-02-19	Antananarivo	Madagascar	1382 m	-18.928	47.8828	Malagasy	CASC, San Francisco, CA, USA	CASC
CASENT0122310	BLF16915	Pheidole	spinosa	Pheidole.megacephala spinosa	1w.	pin	B.L.Fisher et al.	2007-03-03	Toamasina	Madagascar	1010 m	-18.8496	48.2947	Malagasy	CASC, San Francisco, CA, USA	CASC
CASENT0122370	BLF17359	Pheidole	spinosa	Pheidole.MG145	1w., 1s.	pin	B.L.Fisher et al.	2007-04-26	Antananarivo	Madagascar	1362 m	-18.7746	47.6091	Malagasy	CASC, San Francisco, CA, USA	CASC
CASENT0122377	BLF17354	Pheidole	spinosa	Pheidole.megacephala	1w.	pin	B.L.Fisher et al.	2007-04-26	Antananarivo	Madagascar	1362 m	-18.7746	47.6091	Malagasy	CASC, San Francisco, CA, USA	CASC
CASENT0122381	BLF17350	Pheidole	spinosa	Pheidole.MG145	1w., 1s.	pin	B.L.Fisher et al.	2007-04-26	Antananarivo	Madagascar	1362 m	-18.7746	47.6091	Malagasy	CASC, San Francisco, CA, USA	CASC
CASENT0122388	BLF17397	Pheidole	spinosa	Pheidole.MG147	1w., 1s.	pin	B.L.Fisher et al.	2007-04-27	Antananarivo	Madagascar	1423 m	-18.59	47.651	Malagasy	CASC, San Francisco, CA, USA	CASC
CASENT0122394	BLF17407	Pheidole	spinosa	Pheidole.MG147	1w., 1s.	pin	B.L.Fisher et al.	2007-04-27	Antananarivo	Madagascar	1423 m	-18.59	47.651	Malagasy	CASC, San Francisco, CA, USA	CASC
CASENT0122675	BLF16434	Pheidole	spinosa	Pheidole.MGs120	1s.	pin	B.L.Fisher et al.	2007-02-03	Toliara	Madagascar	7 m	-20.2965	44.2815	Malagasy	CASC, San Francisco, CA, USA	CASC
CASENT0122715	BLF16419	Pheidole	spinosa	Pheidole.MGs128	1s.	pin	B.L.Fisher et al.	2007-02-03	Toliara	Madagascar	7 m	-20.2965	44.2815	Malagasy	CASC, San Francisco, CA, USA	CASC
CASENT0122716	BLF16419	Pheidole	spinosa	Pheidole.MGs120	1s.	pin	B.L.Fisher et al.	2007-02-03	Toliara	Madagascar	7 m	-20.2965	44.2815	Malagasy	CASC, San Francisco, CA, USA	CASC
CASENT0122916	BLF16346	Pheidole	spinosa	Pheidole.MG158	1w., 1s.	pin	B.L.Fisher et al.	2007-02-01	Toliara	Madagascar	80 m	-19.5232	45.4575	Malagasy	CASC, San Francisco, CA, USA	CASC
CASENT0123036	BLF16879	Pheidole	spinosa	Pheidole.MG147	1w., 1s.	pin	B.L.Fisher et al.	2007-02-19	Antananarivo	Madagascar	1382 m	-18.928	47.8828	Malagasy	CASC, San Francisco, CA, USA	CASC
CASENT0123038	BLF16904	Pheidole	spinosa	Pheidole.MG147	1w., 1s.	pin	B.L.Fisher et al.	2007-02-19	Antananarivo	Madagascar	1382 m	-18.928	47.8828	Malagasy	CASC, San Francisco, CA, USA	CASC
CASENT0123048	BLF16599	Pheidole	spinosa	Pheidole.megacephala	1w.	pin	B.L.Fisher et al.	2007-02-09	Antananarivo	Madagascar	1241 m	-18.3162	47.1158	Malagasy	CASC, San Francisco, CA, USA	CASC
CASENT0123416	BLF16915	Pheidole	spinosa	Pheidole.MG156	1w.	pin	B.L.Fisher et al.	2007-03-03	Toamasina	Madagascar	1010 m	-18.8496	48.2947	Malagasy	CASC, San Francisco, CA, USA	CASC
CASENT0123983	BLF16916	Pheidole	spinosa	Pheidole.megacephala	1w.	pin	B.L.Fisher et al.	2007-03-04	Toamasina	Madagascar	1080 m	-18.8394	48.3084	Malagasy	CASC, San Francisco, CA, USA	CASC
CASENT0124052	BLF16918b	Pheidole	spinosa	Pheidole.megacephala	1w.	pin	B.L.Fisher et al.	2007-03-05	Toamasina	Madagascar	1000 m	-18.8477	48.2957	Malagasy	CASC, San Francisco, CA, USA	CASC
CASENT0124193	BLF16919b	Pheidole	spinosa	Pheidole.megacephala spinosa	1w.	pin	B.L.Fisher et al.	2007-03-05	Toamasina	Madagascar	1040 m	-18.8581	48.2849	Malagasy	CASC, San Francisco, CA, USA	CASC
CASENT0124203	BLF16919b	Pheidole	spinosa	Pheidole.MG156	1w.	pin	B.L.Fisher et al.	2007-03-05	Toamasina	Madagascar	1040 m	-18.8581	48.2849	Malagasy	CASC, San Francisco, CA, USA	CASC
CASENT0124226	BLF16919b	Pheidole	spinosa	Pheidole.MG156	1w.	pin	B.L.Fisher et al.	2007-03-05	Toamasina	Madagascar	1040 m	-18.8581	48.2849	Malagasy	CASC, San Francisco, CA, USA	CASC
CASENT0124231	BLF16919b	Pheidole	spinosa	Pheidole.MG156	1w.	pin	B.L.Fisher et al.	2007-03-05	Toamasina	Madagascar	1040 m	-18.8581	48.2849	Malagasy	CASC, San Francisco, CA, USA	CASC
CASENT0124296	BLF17513	Pheidole	spinosa	Pheidole.megacephala spinosa	1w., 1s.	pin	B.L.Fisher et al.	2007-05-08	Antananarivo	Madagascar	1403 m	-19.0128	47.4067	Malagasy	CASC, San Francisco, CA, USA	CASC
CASENT0124297	BLF17524	Pheidole	spinosa	Pheidole.MG146	1w., 1s.	pin	B.L.Fisher et al.	2007-05-08	Antananarivo	Madagascar	1403 m	-19.0128	47.4067	Malagasy	CASC, San Francisco, CA, USA	CASC
CASENT0124572	BLF16914	Pheidole	spinosa	Pheidole.MGs129	1s.	pin	B.L.Fisher et al.	2007-03-03	Toamasina	Madagascar	1010 m	-18.8496	48.2947	Malagasy	CASC, San Francisco, CA, USA	CASC
CASENT0124574	BLF16914	Pheidole	spinosa	Pheidole.megacephala	1w.	pin	B.L.Fisher et al.	2007-03-03	Toamasina	Madagascar	1010 m	-18.8496	48.2947	Malagasy	CASC, San Francisco, CA, USA	CASC
CASENT0124909	BLF17045	Pheidole	spinosa	Pheidole.MGs120	1s.	pin	B.L.Fisher et al.	2007-03-23	Antsiranana	Madagascar	30 m	-13.6827	48.4524	Malagasy	CASC, San Francisco, CA, USA	CASC
CASENT0125056	BLF17446	Pheidole	spinosa	Pheidole.MG147	1w., 1s.	pin	B.L.Fisher et al.	2007-05-04	Antananarivo	Madagascar	1434 m	-18.9625	47.5892	Malagasy	CASC, San Francisco, CA, USA	CASC
CASENT0125284	BLF17175	Pheidole	spinosa	Pheidole.MGs120	1s.	pin	B.L.Fisher et al.	2007-03-27	Antsiranana	Madagascar	16 m	-13.3597	50.0039	Malagasy	CASC, San Francisco, CA, USA	CASC
CASENT0125300	BLF17485	Pheidole	spinosa	Pheidole.megacephala spinosa	1w., 1s.	pin	B.L.Fisher et al.	2007-05-04	Antananarivo	Madagascar	1434 m	-18.9625	47.5892	Malagasy	CASC, San Francisco, CA, USA	CASC
CASENT0125301	BLF17489	Pheidole	spinosa	Pheidole.megacephala	1w., 1s.	pin	B.L.Fisher et al.	2007-05-04	Antananarivo	Madagascar	1434 m	-18.9625	47.5892	Malagasy	CASC, San Francisco, CA, USA	CASC
CASENT0125369	BLF17344	Pheidole	spinosa	Pheidole.MG145	1w., 1s.	pin	B.L.Fisher et al.	2007-04-26	Antananarivo	Madagascar	1362 m	-18.7746	47.6091	Malagasy	CASC, San Francisco, CA, USA	CASC
CASENT0125370	BLF17358	Pheidole	spinosa	Pheidole.megacephala spinosa	1w., 1s.	pin	B.L.Fisher et al.	2007-04-26	Antananarivo	Madagascar	1362 m	-18.7746	47.6091	Malagasy	CASC, San Francisco, CA, USA	CASC
CASENT0125417	BLF15694	Pheidole	spinosa	Pheidole.megacephala	1w.	pin	B.L.Fisher et al.	2006-12-06	Toliara	Madagascar	500 m	-24.2407	46.2878	Malagasy	CASC, San Francisco, CA, USA	CASC
CASENT0125567	BLF17301	Pheidole	spinosa	Pheidole.MG147	1w.	pin	B.L.Fisher et al.	2007-03-30	Antsiranana	Madagascar	61 m	-13.1973	49.0487	Malagasy	CASC, San Francisco, CA, USA	CASC
CASENT0125606	BLF17195	Pheidole	spinosa	Pheidole.MG145	1w.	pin	B.L.Fisher et al.	2007-03-28	Antsiranana	Madagascar	43 m	-12.2778	49.2916	Malagasy	CASC, San Francisco, CA, USA	CASC
CASENT0125607	BLF17195	Pheidole	spinosa	Pheidole.MG148	1w.	pin	B.L.Fisher et al.	2007-03-28	Antsiranana	Madagascar	43 m	-12.2778	49.2916	Malagasy	CASC, San Francisco, CA, USA	CASC
CASENT0125611	BLF17229	Pheidole	spinosa	Pheidole.MGs122	1s.	pin	B.L.Fisher et al.	2007-03-28	Antsiranana	Madagascar	43 m	-12.2778	49.2916	Malagasy	CASC, San Francisco, CA, USA	CASC
CASENT0125612	BLF17229	Pheidole	spinosa	Pheidole.MGs122	1s.	pin	B.L.Fisher et al.	2007-03-28	Antsiranana	Madagascar	43 m	-12.2778	49.2916	Malagasy	CASC, San Francisco, CA, USA	CASC
CASENT0125632	BLF15448	Pheidole	spinosa	Pheidole.megacephala	1w.	pin	B.L.Fisher et al.	2006-12-02	Toliara	Madagascar	200 m	-24.569	47.204	Malagasy	CASC, San Francisco, CA, USA	CASC
CASENT0125700	BLF17415	Pheidole	spinosa	Pheidole.MG158	1w.	pin	B.L.Fisher et al.	2007-04-27	Antananarivo	Madagascar	1423 m	-18.59	47.651	Malagasy	CASC, San Francisco, CA, USA	CASC
CASENT0125841	BLF17224	Pheidole	spinosa	Pheidole.megacephala	1w.	pin	B.L.Fisher et al.	2007-03-28	Antsiranana	Madagascar	43 m	-12.2778	49.2916	Malagasy	CASC, San Francisco, CA, USA	CASC
CASENT0125879	BLF17424	Pheidole	spinosa	Pheidole.MG147	1w., 1s.	pin	B.L.Fisher et al.	2007-04-27	Antananarivo	Madagascar	1423 m	-18.59	47.651	Malagasy	CASC, San Francisco, CA, USA	CASC
CASENT0128330	BLF17551	Pheidole	spinosa	Pheidole.MG147	1w., 1s.	pin	B.L.Fisher et al.	2007-05-09	Antananarivo	Madagascar	1513 m	-19.1582	47.497	Malagasy	CASC, San Francisco, CA, USA	CASC
CASENT0128338	BLF17558	Pheidole	spinosa	Pheidole.MGs128	1s.	pin	B.L.Fisher et al.	2007-05-09	Antananarivo	Madagascar	1513 m	-19.1582	47.497	Malagasy	CASC, San Francisco, CA, USA	CASC
CASENT0128339	BLF17566	Pheidole	spinosa	Pheidole.MG158	1w., 1s.	pin	B.L.Fisher et al.	2007-05-09	Antananarivo	Madagascar	1513 m	-19.1582	47.497	Malagasy	CASC, San Francisco, CA, USA	CASC
CASENT0128340	BLF17589	Pheidole	spinosa	Pheidole.MG158	1w., 1s.	pin	B.L.Fisher et al.	2007-05-09	Antananarivo	Madagascar	1513 m	-19.1582	47.497	Malagasy	CASC, San Francisco, CA, USA	CASC
CASENT0128357	BLF17581	Pheidole	spinosa	Pheidole.MG158	1w., 1s.	pin	B.L.Fisher et al.	2007-05-09	Antananarivo	Madagascar	1513 m	-19.1582	47.497	Malagasy	CASC, San Francisco, CA, USA	CASC
CASENT0128369	BLF17592	Pheidole	spinosa	Pheidole.megacephala spinosa	1w., 1s.	pin	B.L.Fisher et al.	2007-05-09	Antananarivo	Madagascar	1513 m	-19.1582	47.497	Malagasy	CASC, San Francisco, CA, USA	CASC
CASENT0128370	BLF17582	Pheidole	spinosa	Pheidole.megacephala	1w., 1s.	pin	B.L.Fisher et al.	2007-05-09	Antananarivo	Madagascar	1513 m	-19.1582	47.497	Malagasy	CASC, San Francisco, CA, USA	CASC
CASENT0128374	BLF17596	Pheidole	spinosa	Pheidole.MG158	1w., 1s.	pin	B.L.Fisher et al.	2007-05-09	Antananarivo	Madagascar	1513 m	-19.1582	47.497	Malagasy	CASC, San Francisco, CA, USA	CASC
CASENT0128434	BLF15358	Pheidole	spinosa	Pheidole.MGs131	1s.	pin	B.L.Fisher et al.	2006-11-27	Toliara	Madagascar	100 m	-24.9815	46.9257	Malagasy	CASC, San Francisco, CA, USA	CASC
CASENT0128528	BLF15693	Pheidole	spinosa	Pheidole.megacephala	1w.	pin	B.L.Fisher et al.	2006-12-06	Toliara	Madagascar	500 m	-24.2407	46.2878	Malagasy	CASC, San Francisco, CA, USA	CASC
CASENT0128792	BLF17492	Pheidole	spinosa	Pheidole.megacephala	1w.	pin	B.L.Fisher et al.	2007-05-04	Antananarivo	Madagascar	1434 m	-18.9625	47.5892	Malagasy	CASC, San Francisco, CA, USA	CASC
CASENT0128799	BLF17479	Pheidole	spinosa	Pheidole.MG145	1w.	pin	B.L.Fisher et al.	2007-05-04	Antananarivo	Madagascar	1434 m	-18.9625	47.5892	Malagasy	CASC, San Francisco, CA, USA	CASC
CASENT0128809	BLF17460	Pheidole	spinosa	Pheidole.MG158	1w., 1s.	pin	B.L.Fisher et al.	2007-05-04	Antananarivo	Madagascar	1434 m	-18.9625	47.5892	Malagasy	CASC, San Francisco, CA, USA	CASC
CASENT0128812	BLF17456	Pheidole	spinosa	Pheidole.MGs128	1s.	pin	B.L.Fisher et al.	2007-05-04	Antananarivo	Madagascar	1434 m	-18.9625	47.5892	Malagasy	CASC, San Francisco, CA, USA	CASC
CASENT0129659	BLF17980	Pheidole	spinosa	Pheidole.MG151	1w.	pin	B.L.Fisher et al.	2007-08-29	Toamasina	Madagascar	14 m	-15.7181	49.9607	Malagasy	CASC, San Francisco, CA, USA	CASC
CASENT0135461	BLF17500	Pheidole	spinosa	Pheidole.MG147	1w., 1s.	pin	B.L.Fisher et al.	2007-05-04	Antananarivo	Madagascar	1326 m	-18.9625	47.5892	Malagasy	CASC, San Francisco, CA, USA	CASC
CASENT0135466	BLF17498	Pheidole	spinosa	Pheidole.MG147	1w., 1s.	pin	B.L.Fisher et al.	2007-05-04	Antananarivo	Madagascar	1326 m	-18.9625	47.5892	Malagasy	CASC, San Francisco, CA, USA	CASC
CASENT0135472	BLF17473	Pheidole	spinosa	Pheidole.MG158	1w., 1s.	pin	B.L.Fisher et al.	2007-05-04	Antananarivo	Madagascar	1434 m	-18.9625	47.5892	Malagasy	CASC, San Francisco, CA, USA	CASC
CASENT0135474	BLF17480	Pheidole	spinosa	Pheidole.MG145	1w.	pin	B.L.Fisher et al.	2007-05-04	Antananarivo	Madagascar	1434 m	-18.9625	47.5892	Malagasy	CASC, San Francisco, CA, USA	CASC
CASENT0135729	BLF18285_01	Pheidole	spinosa	Pheidole.MGs122	1w.	pin	B.L.Fisher	2007-11-07	Toliara	Madagascar	30 m	-20.0692	44.6604	Malagasy	CASC, San Francisco, CA, USA	CASC
CASENT0135730	BLF18285_02	Pheidole	spinosa	Pheidole.MGs122	1w.	pin	B.L.Fisher	2007-11-14	Toliara	Madagascar	30 m	-20.0692	44.6604	Malagasy	CASC, San Francisco, CA, USA	CASC
CASENT0135731	BLF18285_02	Pheidole	spinosa	Pheidole.MGs122	1w.	pin	B.L.Fisher	2007-11-14	Toliara	Madagascar	30 m	-20.0692	44.6604	Malagasy	CASC, San Francisco, CA, USA	CASC
CASENT0135813	BLF19594_04	Pheidole	spinosa	Pheidole.MG145	1w.	pin	B.L.Fisher	2008-01-13	Toamasina	Madagascar	525 m	-17.9198	49.2004	Malagasy	CASC, San Francisco, CA, USA	CASC
CASENT0135852	BLF19594_05	Pheidole	spinosa	Pheidole.MG145	1w.	pin	B.L.Fisher	2008-01-20	Toamasina	Madagascar	525 m	-17.9198	49.2004	Malagasy	CASC, San Francisco, CA, USA	CASC
CASENT0135928	BLF18284_12	Pheidole	spinosa	Pheidole.MGs122	1w.	pin	B.L.Fisher	2008-01-23	Toliara	Madagascar	30 m	-20.0685	44.6596	Malagasy	CASC, San Francisco, CA, USA	CASC
CASENT0137795	BLF20391	Pheidole	spinosa	Pheidole.MG150	1w., 1s.	pin	B.L.Fisher et al.	2008-04-17	Mahajanga	Madagascar	77 m	-15.8541	46.7466	Malagasy	CASC, San Francisco, CA, USA	CASC
CASENT0137807	BLF20397	Pheidole	spinosa	Pheidole.MG150	1w., 1s.	pin	B.L.Fisher et al.	2008-04-17	Mahajanga	Madagascar	77 m	-15.8541	46.7466	Malagasy	CASC, San Francisco, CA, USA	CASC
CASENT0137845	BLF20195	Pheidole	spinosa	Pheidole.MG150	1w., 1s.	pin	B.L.Fisher et al.	2008-04-11	Antsiranana	Madagascar	22 m	-13.7073	48.4322	Malagasy	CASC, San Francisco, CA, USA	CASC
CASENT0137847	BLF20183	Pheidole	spinosa	Pheidole.MG152	1w.	pin	B.L.Fisher et al.	2008-04-11	Antsiranana	Madagascar	22 m	-13.7073	48.4322	Malagasy	CASC, San Francisco, CA, USA	CASC
CASENT0137851	BLF20188	Pheidole	spinosa	Pheidole.megacephala spinosa	1w., 1s.	pin	B.L.Fisher et al.	2008-04-11	Antsiranana	Madagascar	22 m	-13.7073	48.4322	Malagasy	CASC, San Francisco, CA, USA	CASC
CASENT0137887	BLF20061	Pheidole	spinosa	Pheidole.MG146	1w., 1s.	pin	B.L.Fisher et al.	2008-04-10	Mahajanga	Madagascar	21 m	-14.8439	48.0142	Malagasy	CASC, San Francisco, CA, USA	CASC
CASENT0137891	BLF20030	Pheidole	spinosa	Pheidole.MG150	1w., 1s.	pin	B.L.Fisher et al.	2008-04-10	Mahajanga	Madagascar	21 m	-14.8439	48.0142	Malagasy	CASC, San Francisco, CA, USA	CASC
CASENT0137894	BLF20052	Pheidole	spinosa	Pheidole.MG150	1w.	pin	B.L.Fisher et al.	2008-04-10	Mahajanga	Madagascar	21 m	-14.8439	48.0142	Malagasy	CASC, San Francisco, CA, USA	CASC
CASENT0137905	BLF20048	Pheidole	spinosa	Pheidole.MG146	1w.	pin	B.L.Fisher et al.	2008-04-10	Mahajanga	Madagascar	21 m	-14.8439	48.0142	Malagasy	CASC, San Francisco, CA, USA	CASC
CASENT0137907	BLF20044	Pheidole	spinosa	Pheidole.MG150	1w., 1s.	pin	B.L.Fisher et al.	2008-04-10	Mahajanga	Madagascar	21 m	-14.8439	48.0142	Malagasy	CASC, San Francisco, CA, USA	CASC
CASENT0137924	BLF20024	Pheidole	spinosa	Pheidole.MG150	1w., 1s.	pin	B.L.Fisher et al.	2008-04-10	Mahajanga	Madagascar	21 m	-14.8439	48.0142	Malagasy	CASC, San Francisco, CA, USA	CASC
CASENT0138290	BLF20145	Pheidole	spinosa	Pheidole.MG145	1w.	pin	B.L.Fisher et al.	2008-04-11	Mahajanga	Madagascar	247 m	-14.1074	48.1105	Malagasy	CASC, San Francisco, CA, USA	CASC
CASENT0138745	BLF18285_26	Pheidole	spinosa	Pheidole.MGs122	1w.	pin	B.L.Fisher	2008-04-30	Toliara	Madagascar	30 m	-20.0692	44.6604	Malagasy	CASC, San Francisco, CA, USA	CASC
CASENT0138746	BLF18285_28	Pheidole	spinosa	Pheidole.MGs122	1w.	pin	B.L.Fisher	2008-05-14	Toliara	Madagascar	30 m	-20.0692	44.6604	Malagasy	CASC, San Francisco, CA, USA	CASC
CASENT0138748	BLF18284_13	Pheidole	spinosa	Pheidole.MGs122	1w.	pin	B.L.Fisher	2008-01-30	Toliara	Madagascar	30 m	-20.0685	44.6596	Malagasy	CASC, San Francisco, CA, USA	CASC
CASENT0141674	BLF19412	Pheidole	spinosa	Pheidole.MG148	1w.	pin	B.L.Fisher et al.	2007-12-13	Toamasina	Madagascar	140 m	-18.8145	48.962	Malagasy	CASC, San Francisco, CA, USA	CASC
CASENT0141691	BLF19412	Pheidole	spinosa	Pheidole.MGs130	1s.	pin	B.L.Fisher et al.	2007-12-13	Toamasina	Madagascar	140 m	-18.8145	48.962	Malagasy	CASC, San Francisco, CA, USA	CASC
CASENT0141929	BLF18541	Pheidole	spinosa	Pheidole.MGs128	1s.	pin	B.L.Fisher et al.	2007-11-21	Antsiranana	Madagascar	25 m	-12.0995	49.3387	Malagasy	CASC, San Francisco, CA, USA	CASC
CASENT0141957	BLF19541	Pheidole	spinosa	Pheidole.MGs128	1s.	pin	B.L.Fisher et al.	2007-12-15	Toamasina	Madagascar	500 m	-17.918	49.2007	Malagasy	CASC, San Francisco, CA, USA	CASC
CASENT0143041	MA-02-13A-30	Pheidole	spinosa	Pheidole.MG154	1w.	pin	R. Harin'Hala	2002-05-27	Tulear	Madagascar	840 m	-22.8865	44.6922	Malagasy	CASC, San Francisco, CA, USA	CASC
CASENT0143965	BLF18285_60	Pheidole	spinosa	Pheidole.MGs122	1w.	pin	B.L.Fisher	2008-12-24	Toliara	Madagascar	30 m	-20.0692	44.6604	Malagasy	CASC, San Francisco, CA, USA	CASC
CASENT0143968	BLF18285_61	Pheidole	spinosa	Pheidole.MGs120	1w.	pin	B.L.Fisher	2008-12-31	Toliara	Madagascar	30 m	-20.0692	44.6604	Malagasy	CASC, San Francisco, CA, USA	CASC
CASENT0144030	BLF19593_56	Pheidole	spinosa	Pheidole.MG145	1w.	pin	B.L.Fisher	2009-01-11	Toamasina	Madagascar	550 m	-17.9161	49.2019	Malagasy	CASC, San Francisco, CA, USA	CASC
CASENT0144376	MA-02-18A-06	Pheidole	spinosa	Pheidole.MG154	1w.	pin	R. Harin'Hala	2001-12-16	Tulear	Madagascar	30 m	-22.9037	43.4755	Malagasy	CASC, San Francisco, CA, USA	CASC
CASENT0144406	MA-02-18A-32	Pheidole	spinosa	Pheidole.MG148	1w.	pin	R. Harin'Hala	2002-09-03	Tulear	Madagascar	30 m	-22.9037	43.4755	Malagasy	CASC, San Francisco, CA, USA	CASC
CASENT0144407	MA-02-18A-32	Pheidole	spinosa	Pheidole.MG155	1w.	pin	R. Harin'Hala	2002-09-03	Tulear	Madagascar	30 m	-22.9037	43.4755	Malagasy	CASC, San Francisco, CA, USA	CASC
CASENT0144694	BLF19593_53	Pheidole	spinosa	Pheidole.MG145	1w.	pin	B.L.Fisher	2008-12-21	Toamasina	Madagascar	550 m	-17.9161	49.2019	Malagasy	CASC, San Francisco, CA, USA	CASC
CASENT0144734	BLF18285_48	Pheidole	spinosa	Pheidole.MGs122	1w.	pin	B.L.Fisher	2008-10-01	Toliara	Madagascar	30 m	-20.0692	44.6604	Malagasy	CASC, San Francisco, CA, USA	CASC
CASENT0145308	BLF19594_63	Pheidole	spinosa	Pheidole.MG145	1w.	pin	B.L.Fisher	2009-03-01	Toamasina	Madagascar	525 m	-17.9198	49.2004	Malagasy	CASC, San Francisco, CA, USA	CASC
CASENT0145322	BLF19594_65	Pheidole	spinosa	Pheidole.MG145	1w.	pin	B.L.Fisher	2009-03-15	Toamasina	Madagascar	525 m	-17.9198	49.2004	Malagasy	CASC, San Francisco, CA, USA	CASC
CASENT0145331	BLF19594_67	Pheidole	spinosa	Pheidole.MG145	1w.	pin	B.L.Fisher	2009-03-29	Toamasina	Madagascar	525 m	-17.9198	49.2004	Malagasy	CASC, San Francisco, CA, USA	CASC
CASENT0145970	BLF21946	Pheidole	spinosa	Pheidole.MG154	1w.	pin	B.L.Fisher et al.	2009-02-12	Toliara	Madagascar	820 m	-23.4559	46.1738	Malagasy	CASC, San Francisco, CA, USA	CASC
CASENT0146585	MA-02-18A-07	Pheidole	spinosa	Pheidole.MG154	1w.	pin	R. Harin'Hala	2001-12-26	Tulear	Madagascar	30 m	-22.9037	43.4755	Malagasy	CASC, San Francisco, CA, USA	CASC
CASENT0147025	BLF21563	Pheidole	spinosa	Pheidole.megacephala spinosa	1w., 1s.	pin	B.L.Fisher et al.	2009-02-08	Toliara	Madagascar	1300 m	-23.4571	46.4473	Malagasy	CASC, San Francisco, CA, USA	CASC
CASENT0147031	BLF21559	Pheidole	spinosa	Pheidole.MG145	1w., 1s.	pin	B.L.Fisher et al.	2009-02-08	Toliara	Madagascar	1300 m	-23.4571	46.4473	Malagasy	CASC, San Francisco, CA, USA	CASC
CASENT0147033	BLF21561	Pheidole	spinosa	Pheidole.megacephala spinosa	1w., 1s.	pin	B.L.Fisher et al.	2009-02-08	Toliara	Madagascar	1300 m	-23.4571	46.4473	Malagasy	CASC, San Francisco, CA, USA	CASC
CASENT0147093	BLF21966	Pheidole	spinosa	Pheidole.MG154	2w.	pin	B.L.Fisher et al.	2009-02-12	Toliara	Madagascar	800 m	-23.2656	46.0972	Malagasy	CASC, San Francisco, CA, USA	CASC
CASENT0147094	BLF21971	Pheidole	spinosa	Pheidole.MG154	1w.	pin	B.L.Fisher et al.	2009-02-12	Toliara	Madagascar	800 m	-23.2656	46.0972	Malagasy	CASC, San Francisco, CA, USA	CASC
CASENT0147600	BLF18284_64	Pheidole	spinosa	Pheidole.MGs122	1w.	pin	B.L.Fisher	2009-01-21	Toliara	Madagascar	30 m	-20.0685	44.6596	Malagasy	CASC, San Francisco, CA, USA	CASC
CASENT0147617	BLF18284_69	Pheidole	spinosa	Pheidole.MGs122	1w.	pin	B.L.Fisher	2009-02-25	Toliara	Madagascar	30 m	-20.0685	44.6596	Malagasy	CASC, San Francisco, CA, USA	CASC
CASENT0147655	BLF18284_64	Pheidole	spinosa	Pheidole.MGs120	1w.	pin	B.L.Fisher	2009-01-21	Toliara	Madagascar	30 m	-20.0685	44.6596	Malagasy	CASC, San Francisco, CA, USA	CASC
CASENT0147671	BLF18285_67	Pheidole	spinosa	Pheidole.MGs120	1w.	pin	B.L.Fisher	2009-02-11	Toliara	Madagascar	30 m	-20.0692	44.6604	Malagasy	CASC, San Francisco, CA, USA	CASC
CASENT0147675	BLF18285_68	Pheidole	spinosa	Pheidole.MGs120	1w.	pin	B.L.Fisher	2009-02-18	Toliara	Madagascar	30 m	-20.0692	44.6604	Malagasy	CASC, San Francisco, CA, USA	CASC
CASENT0147691	BLF18285_71	Pheidole	spinosa	Pheidole.MGs122	1w.	pin	B.L.Fisher	2009-03-11	Toliara	Madagascar	30 m	-20.0692	44.6604	Malagasy	CASC, San Francisco, CA, USA	CASC
CASENT0147694	BLF18285_72	Pheidole	spinosa	Pheidole.MGs120	1w.	pin	B.L.Fisher	2009-03-18	Toliara	Madagascar	30 m	-20.0692	44.6604	Malagasy	CASC, San Francisco, CA, USA	CASC
CASENT0147709	BLF18285_75	Pheidole	spinosa	Pheidole.MGs122	1w.	pin	B.L.Fisher	2009-04-08	Toliara	Madagascar	30 m	-20.0692	44.6604	Malagasy	CASC, San Francisco, CA, USA	CASC
CASENT0148124	BLF19594_70	Pheidole	spinosa	Pheidole.MG145	1w.	pin	B.L.Fisher	2009-04-19	Toamasina	Madagascar	525 m	-17.9198	49.2004	Malagasy	CASC, San Francisco, CA, USA	CASC
CASENT0148129	BLF19594_72	Pheidole	spinosa	Pheidole.MG145	1w.	pin	B.L.Fisher	2009-05-03	Toamasina	Madagascar	525 m	-17.9198	49.2004	Malagasy	CASC, San Francisco, CA, USA	CASC
CASENT0148132	BLF19594_73	Pheidole	spinosa	Pheidole.MG145	1w.	pin	B.L.Fisher	2009-05-10	Toamasina	Madagascar	525 m	-17.9198	49.2004	Malagasy	CASC, San Francisco, CA, USA	CASC
CASENT0148154	BLF19594_81	Pheidole	spinosa	Pheidole.MG145	1w.	pin	Brian L. Fisher	2009-07-05	Toamasina	Madagascar	525 m	-17.9198	49.2004	Malagasy	CASC, San Francisco, CA, USA	CASC
CASENT0148184	BLF19593_69	Pheidole	spinosa	Pheidole.MG145	1w.	pin	B.L.Fisher	2009-04-12	Toamasina	Madagascar	550 m	-17.9161	49.2019	Malagasy	CASC, San Francisco, CA, USA	CASC
CASENT0148749	BLF21911	Pheidole	spinosa	Pheidole.megacephala spinosa	1w., 1s.	pin	B.L.Fisher et al.	2009-02-11	Toliara	Madagascar	1345 m	-23.4537	46.4577	Malagasy	CASC, San Francisco, CA, USA	CASC
CASENT0148757	BLF21865	Pheidole	spinosa	Pheidole.MG145	1w., 1s.	pin	B.L.Fisher et al.	2009-02-11	Toliara	Madagascar	1345 m	-23.4537	46.4577	Malagasy	CASC, San Francisco, CA, USA	CASC
CASENT0148838	BLF21869	Pheidole	spinosa	Pheidole.MG145	1w., 1s.	pin	B.L.Fisher et al.	2009-02-11	Toliara	Madagascar	1345 m	-23.4537	46.4577	Malagasy	CASC, San Francisco, CA, USA	CASC
CASENT0148841	BLF21887	Pheidole	spinosa	Pheidole.megacephala	1w., 1s.	pin	B.L.Fisher et al.	2009-02-11	Toliara	Madagascar	1345 m	-23.4537	46.4577	Malagasy	CASC, San Francisco, CA, USA	CASC
CASENT0148844	BLF21905	Pheidole	spinosa	Pheidole.MG145	1w., 1s.	pin	B.L.Fisher et al.	2009-02-11	Toliara	Madagascar	1345 m	-23.4537	46.4577	Malagasy	CASC, San Francisco, CA, USA	CASC
CASENT0149423	BLF21528	Pheidole	spinosa	Pheidole.MG145	1w., 1s.	pin	B.L.Fisher et al.	2009-02-08	Toliara	Madagascar	1365 m	-23.4185	46.4583	Malagasy	CASC, San Francisco, CA, USA	CASC
CASENT0149427	BLF21504	Pheidole	spinosa	Pheidole.MG145	1w., 1s.	pin	B.L.Fisher et al.	2009-02-08	Toliara	Madagascar	1365 m	-23.4185	46.4583	Malagasy	CASC, San Francisco, CA, USA	CASC
CASENT0149580	BLF22431	Pheidole	spinosa	Pheidole.megacephala spinosa	1w.	pin	B.L.Fisher et al.	2009-02-24	Toamasina	Madagascar	850 m	-17.6268	48.7799	Malagasy	CASC, San Francisco, CA, USA	CASC
CASENT0149618	BLF21483	Pheidole	spinosa	Pheidole.MG145	1w., 1s.	pin	B.L.Fisher et al.	2009-02-08	Toliara	Madagascar	1365 m	-23.4185	46.4583	Malagasy	CASC, San Francisco, CA, USA	CASC
CASENT0149639	BLF21499	Pheidole	spinosa	Pheidole.megacephala spinosa	1w., 1s.	pin	B.L.Fisher et al.	2009-02-08	Toliara	Madagascar	1365 m	-23.4185	46.4583	Malagasy	CASC, San Francisco, CA, USA	CASC
CASENT0149640	BLF21519	Pheidole	spinosa	Pheidole.megacephala	1w., 1s.	pin	B.L.Fisher et al.	2009-02-08	Toliara	Madagascar	1365 m	-23.4185	46.4583	Malagasy	CASC, San Francisco, CA, USA	CASC
CASENT0149641	BLF21544	Pheidole	spinosa	Pheidole.megacephala spinosa	1w., 1s.	pin	B.L.Fisher et al.	2009-02-08	Toliara	Madagascar	1365 m	-23.4185	46.4583	Malagasy	CASC, San Francisco, CA, USA	CASC
CASENT0149654	BLF21517	Pheidole	spinosa	Pheidole.MG145	1w., 1s.	pin	B.L.Fisher et al.	2009-02-08	Toliara	Madagascar	1365 m	-23.4185	46.4583	Malagasy	CASC, San Francisco, CA, USA	CASC
CASENT0149707	BLF21486	Pheidole	spinosa	Pheidole.MG145	1w., 1s.	pin	B.L.Fisher et al.	2009-02-08	Toliara	Madagascar	1365 m	-23.4185	46.4583	Malagasy	CASC, San Francisco, CA, USA	CASC
CASENT0149725	BLF21541	Pheidole	spinosa	Pheidole.megacephala spinosa	1w.	pin	B.L.Fisher et al.	2009-02-08	Toliara	Madagascar	1365 m	-23.4185	46.4583	Malagasy	CASC, San Francisco, CA, USA	CASC
CASENT0149829	BLF22091	Pheidole	spinosa	Pheidole.megacephala spinosa	1w., 1s.	pin	B.L.Fisher et al.	2009-02-19	Toamasina	Madagascar	950 m	-17.7336	48.7263	Malagasy	CASC, San Francisco, CA, USA	CASC
CASENT0149830	BLF22086	Pheidole	spinosa	Pheidole.MG155	1w., 1s.	pin	B.L.Fisher et al.	2009-02-19	Toamasina	Madagascar	950 m	-17.7336	48.7263	Malagasy	CASC, San Francisco, CA, USA	CASC
CASENT0151114	MA-02-13A-30	Pheidole	spinosa	Pheidole.MG154	1w.	pin	R. Harin'Hala	2002-05-27	Tulear	Madagascar	840 m	-22.8865	44.6922	Malagasy	CASC, San Francisco, CA, USA	CASC
CASENT0151138	MA-02-13A-36	Pheidole	spinosa	Pheidole.MG154	1w.	pin	R. Harin'Hala	2002-07-25	Tulear	Madagascar	840 m	-22.8865	44.6922	Malagasy	CASC, San Francisco, CA, USA	CASC
CASENT0151140	MA-02-13A-31	Pheidole	spinosa	Pheidole.MGs132	1s.	pin	R. Harin'Hala	2002-06-04	Tulear	Madagascar	840 m	-22.8865	44.6922	Malagasy	CASC, San Francisco, CA, USA	CASC
CASENT0151141	MA-02-13A-31	Pheidole	spinosa	Pheidole.MG154	1w.	pin	R. Harin'Hala	2002-06-04	Tulear	Madagascar	840 m	-22.8865	44.6922	Malagasy	CASC, San Francisco, CA, USA	CASC
CASENT0151162	MA-02-13A-06	Pheidole	spinosa	Pheidole.MG154	1w.	pin	R. Harin'Hala	2001-12-07	Tulear	Madagascar	840 m	-22.8865	44.6922	Malagasy	CASC, San Francisco, CA, USA	CASC
CASENT0151185	MA-02-13A-28	Pheidole	spinosa	Pheidole.MG154	1w.	pin	R. Harin'Hala	2002-05-09	Tulear	Madagascar	840 m	-22.8865	44.6922	Malagasy	CASC, San Francisco, CA, USA	CASC
CASENT0151202	MA-02-13B-27	Pheidole	spinosa	Pheidole.MG154	1w.	pin	R. Harin'Hala	2002-05-01	Tulear	Madagascar	825 m	-22.8405	44.7312	Malagasy	CASC, San Francisco, CA, USA	CASC
CASENT0151215	MA-02-13B-10	Pheidole	spinosa	Pheidole.MG154	1w.	pin	R. Harin'Hala	2001-12-29	Tulear	Madagascar	825 m	-22.8405	44.7312	Malagasy	CASC, San Francisco, CA, USA	CASC
CASENT0151284	MA-02-14A-16	Pheidole	spinosa	Pheidole.MG154	1w.	pin	R. Harin'Hala	2002-02-15	Tulear	Madagascar	165 m	-23.6865	44.591	Malagasy	CASC, San Francisco, CA, USA	CASC
CASENT0151325	MA-02-14A-20	Pheidole	spinosa	Pheidole.MG154	1w.	pin	R. Harin'Hala	2002-03-14	Tulear	Madagascar	165 m	-23.6865	44.591	Malagasy	CASC, San Francisco, CA, USA	CASC
CASENT0151346	MA-02-14A-34	Pheidole	spinosa	Pheidole.MG154	1w.	pin	R. Harin'Hala	2002-08-28	Tulear	Madagascar	165 m	-23.6865	44.591	Malagasy	CASC, San Francisco, CA, USA	CASC
CASENT0151381	MA-02-14B-02	Pheidole	spinosa	Pheidole.MG154	1w.	pin	R. Harin'Hala	2001-11-10	Tulear	Madagascar	180 m	-23.6898	44.5755	Malagasy	CASC, San Francisco, CA, USA	CASC
CASENT0151412	MA-02-14B-08	Pheidole	spinosa	Pheidole.MG155	1w.	pin	R. Harin'Hala	2001-12-25	Tulear	Madagascar	180 m	-23.6898	44.5755	Malagasy	CASC, San Francisco, CA, USA	CASC
CASENT0152014	BLF22216	Pheidole	spinosa	Pheidole.megacephala spinosa	1w.	pin	B.L.Fisher et al.	2009-02-21	Toamasina	Madagascar	780 m	-17.7591	48.8547	Malagasy	CASC, San Francisco, CA, USA	CASC
CASENT0152460	BLF22164	Pheidole	spinosa	Pheidole.MG155	1w., 1s.	pin	B.L.Fisher et al.	2009-02-19	Toamasina	Madagascar	860 m	-17.743	48.7294	Malagasy	CASC, San Francisco, CA, USA	CASC
CASENT0152492	BLF22158	Pheidole	spinosa	Pheidole.MG155	1w.	pin	B.L.Fisher et al.	2009-02-19	Toamasina	Madagascar	860 m	-17.743	48.7294	Malagasy	CASC, San Francisco, CA, USA	CASC
CASENT0152701	MA-02-13B-40	Pheidole	spinosa	Pheidole.MG154	1w.	pin	R. Harin'Hala	2002-10-16	Tulear	Madagascar	825 m	-22.8405	44.7312	Malagasy	CASC, San Francisco, CA, USA	CASC
CASENT0152702	MA-02-13B-40	Pheidole	spinosa	Pheidole.MGs127	1s.	pin	R. Harin'Hala	2002-10-16	Tulear	Madagascar	825 m	-22.8405	44.7312	Malagasy	CASC, San Francisco, CA, USA	CASC
CASENT0152717	MA-02-13A-29	Pheidole	spinosa	Pheidole.MG154	1w.	pin	R. Harin'Hala	2002-05-19	Tulear	Madagascar	840 m	-22.8865	44.6922	Malagasy	CASC, San Francisco, CA, USA	CASC
CASENT0152741	MA-02-13A-27	Pheidole	spinosa	Pheidole.MG154	1w.	pin	R. Harin'Hala	2002-05-01	Tulear	Madagascar	840 m	-22.8865	44.6922	Malagasy	CASC, San Francisco, CA, USA	CASC
CASENT0152754	MA-02-13A-44	Pheidole	spinosa	Pheidole.MG154	1w.	pin	R. Harin'Hala	2002-11-16	Tulear	Madagascar	840 m	-22.8865	44.6922	Malagasy	CASC, San Francisco, CA, USA	CASC
CASENT0152775	MA-02-13B-03	Pheidole	spinosa	Pheidole.MG154	1w.	pin	R. Harin'Hala	2001-11-19	Tulear	Madagascar	825 m	-22.8405	44.7312	Malagasy	CASC, San Francisco, CA, USA	CASC
CASENT0152856	MA-02-14A-18	Pheidole	spinosa	Pheidole.MG154	1w.	pin	R. Harin'Hala	2002-03-01	Tulear	Madagascar	165 m	-23.6865	44.591	Malagasy	CASC, San Francisco, CA, USA	CASC
CASENT0152880	MA-02-14A-25	Pheidole	spinosa	Pheidole.MG154	1w.	pin	R. Harin'Hala	2002-05-19	Tulear	Madagascar	165 m	-23.6865	44.591	Malagasy	CASC, San Francisco, CA, USA	CASC
CASENT0152923	MA-02-14B-04	Pheidole	spinosa	Pheidole.MG154	1w.	pin	R. Harin'Hala	2001-11-28	Tulear	Madagascar	180 m	-23.6898	44.5755	Malagasy	CASC, San Francisco, CA, USA	CASC
CASENT0152981	MA-02-13A-37	Pheidole	spinosa	Pheidole.MG154	1w.	pin	R. Harin'Hala	2002-08-08	Tulear	Madagascar	840 m	-22.8865	44.6922	Malagasy	CASC, San Francisco, CA, USA	CASC
CASENT0153513	MA-02-13A-22	Pheidole	spinosa	Pheidole.MG154	1w.	pin	R. Harin'Hala	2002-03-27	Tulear	Madagascar	840 m	-22.8865	44.6922	Malagasy	CASC, San Francisco, CA, USA	CASC
CASENT0153536	MA-02-13B-14	Pheidole	spinosa	Pheidole.MG154	1w.	pin	R. Harin'Hala	2002-01-26	Tulear	Madagascar	825 m	-22.8405	44.7312	Malagasy	CASC, San Francisco, CA, USA	CASC
CASENT0153721	MA-02-13A-32	Pheidole	spinosa	Pheidole.MG154	1w.	pin	R. Harin'Hala	2002-06-12	Tulear	Madagascar	840 m	-22.8865	44.6922	Malagasy	CASC, San Francisco, CA, USA	CASC
CASENT0153731	MA-02-13A-51	Pheidole	spinosa	Pheidole.MG154	1w.	pin	R. Harin'Hala	2003-02-28	Tulear	Madagascar	840 m	-22.8865	44.6922	Malagasy	CASC, San Francisco, CA, USA	CASC
CASENT0153761	MA-02-14A-14	Pheidole	spinosa	Pheidole.MG154	1w.	pin	R. Harin'Hala	2002-02-01	Tulear	Madagascar	165 m	-23.6865	44.591	Malagasy	CASC, San Francisco, CA, USA	CASC
CASENT0153800	MA-02-14A-15	Pheidole	spinosa	Pheidole.MG154	1w.	pin	R. Harin'Hala	2002-02-08	Tulear	Madagascar	165 m	-23.6865	44.591	Malagasy	CASC, San Francisco, CA, USA	CASC
CASENT0153833	MA-02-14A-21	Pheidole	spinosa	Pheidole.MG154	1w.	pin	R. Harin'Hala	2002-03-22	Tulear	Madagascar	165 m	-23.6865	44.591	Malagasy	CASC, San Francisco, CA, USA	CASC
CASENT0153860	MA-02-14B-05	Pheidole	spinosa	Pheidole.MG154	1w.	pin	R. Harin'Hala	2001-12-04	Tulear	Madagascar	180 m	-23.6898	44.5755	Malagasy	CASC, San Francisco, CA, USA	CASC
CASENT0153906	MA-02-13A-35	Pheidole	spinosa	Pheidole.MG154	1w.	pin	R. Harin'Hala	2002-07-13	Tulear	Madagascar	840 m	-22.8865	44.6922	Malagasy	CASC, San Francisco, CA, USA	CASC
CASENT0153917	MA-02-13A-03	Pheidole	spinosa	Pheidole.MG154	1w.	pin	R. Harin'Hala	2001-11-19	Tulear	Madagascar	840 m	-22.8865	44.6922	Malagasy	CASC, San Francisco, CA, USA	CASC
CASENT0153937	MA-02-13A-18	Pheidole	spinosa	Pheidole.MG154	1w.	pin	R. Harin'Hala	2002-02-28	Tulear	Madagascar	840 m	-22.8865	44.6922	Malagasy	CASC, San Francisco, CA, USA	CASC
CASENT0153963	MA-02-13A-21	Pheidole	spinosa	Pheidole.MG154	1w.	pin	R. Harin'Hala	2002-03-20	Tulear	Madagascar	840 m	-22.8865	44.6922	Malagasy	CASC, San Francisco, CA, USA	CASC
CASENT0153970	MA-02-13A-26	Pheidole	spinosa	Pheidole.MG154	1w.	pin	R. Harin'Hala	2002-04-23	Tulear	Madagascar	840 m	-22.8865	44.6922	Malagasy	CASC, San Francisco, CA, USA	CASC
CASENT0153988	MA-02-13A-38	Pheidole	spinosa	Pheidole.MG154	1w.	pin	R. Harin'Hala	2002-08-19	Tulear	Madagascar	840 m	-22.8865	44.6922	Malagasy	CASC, San Francisco, CA, USA	CASC
CASENT0153998	MA-02-13A-42	Pheidole	spinosa	Pheidole.MG154	1w.	pin	R. Harin'Hala	2002-10-05	Tulear	Madagascar	840 m	-22.8865	44.6922	Malagasy	CASC, San Francisco, CA, USA	CASC
CASENT0154018	MA-02-13A-17	Pheidole	spinosa	Pheidole.MG154	1w.	pin	R. Harin'Hala	2002-02-21	Tulear	Madagascar	840 m	-22.8865	44.6922	Malagasy	CASC, San Francisco, CA, USA	CASC
CASENT0154055	MA-02-14A-13	Pheidole	spinosa	Pheidole.MG154	1w.	pin	R. Harin'Hala	2002-01-25	Tulear	Madagascar	165 m	-23.6865	44.591	Malagasy	CASC, San Francisco, CA, USA	CASC
CASENT0154078	MA-02-14A-12	Pheidole	spinosa	Pheidole.MGs122	1s.	pin	R. Harin'Hala	2002-01-18	Tulear	Madagascar	165 m	-23.6865	44.591	Malagasy	CASC, San Francisco, CA, USA	CASC
CASENT0154079	MA-02-14A-12	Pheidole	spinosa	Pheidole.MG154	1w.	pin	R. Harin'Hala	2002-01-18	Tulear	Madagascar	165 m	-23.6865	44.591	Malagasy	CASC, San Francisco, CA, USA	CASC
CASENT0154122	MA-02-14A-17	Pheidole	spinosa	Pheidole.MG154	1w.	pin	R. Harin'Hala	2002-02-22	Tulear	Madagascar	165 m	-23.6865	44.591	Malagasy	CASC, San Francisco, CA, USA	CASC
CASENT0154148	MA-02-14A-27	Pheidole	spinosa	Pheidole.MG154	1w.	pin	R. Harin'Hala	2002-06-18	Tulear	Madagascar	165 m	-23.6865	44.591	Malagasy	CASC, San Francisco, CA, USA	CASC
CASENT0154191	MA-02-14A-26	Pheidole	spinosa	Pheidole.MG154	1w.	pin	R. Harin'Hala	2002-06-08	Tulear	Madagascar	165 m	-23.6865	44.591	Malagasy	CASC, San Francisco, CA, USA	CASC
CASENT0154235	MA-02-14B-03	Pheidole	spinosa	Pheidole.MG154	1w.	pin	R. Harin'Hala	2001-11-21	Tulear	Madagascar	180 m	-23.6898	44.5755	Malagasy	CASC, San Francisco, CA, USA	CASC
CASENT0154260	MA-02-14B-06	Pheidole	spinosa	Pheidole.MG154	1w.	pin	R. Harin'Hala	2001-12-11	Tulear	Madagascar	180 m	-23.6898	44.5755	Malagasy	CASC, San Francisco, CA, USA	CASC
CASENT0154270	MA-02-14A-28	Pheidole	spinosa	Pheidole.MG154	1w.	pin	R. Harin'Hala	2002-06-28	Tulear	Madagascar	165 m	-23.6865	44.591	Malagasy	CASC, San Francisco, CA, USA	CASC
CASENT0154296	MA-02-14B-07	Pheidole	spinosa	Pheidole.MG154	1w.	pin	R. Harin'Hala	2001-12-18	Tulear	Madagascar	180 m	-23.6898	44.5755	Malagasy	CASC, San Francisco, CA, USA	CASC
CASENT0154334	MA-02-14B-14	Pheidole	spinosa	Pheidole.MG154	1w.	pin	R. Harin'Hala	2002-02-01	Tulear	Madagascar	180 m	-23.6898	44.5755	Malagasy	CASC, San Francisco, CA, USA	CASC
CASENT0154389	MA-02-18B-31	Pheidole	spinosa	Pheidole.MG155	1w.	pin	R. Harin'Hala	2002-08-19	Tulear	Madagascar	37 m	-22.9133	43.4822	Malagasy	CASC, San Francisco, CA, USA	CASC
CASENT0154413	MA-02-14B-01	Pheidole	spinosa	Pheidole.MG155	1w.	pin	R. Harin'Hala	2001-10-15	Tulear	Madagascar	180 m	-23.6898	44.5755	Malagasy	CASC, San Francisco, CA, USA	CASC
CASENT0154466	MG-22-02	Pheidole	spinosa	Pheidole.MGs132	1s.	pin	Rin'ha, Mike	2002-10-26	Toliara	Madagascar	85 m	-25.0067	46.3033	Malagasy	CASC, San Francisco, CA, USA	CASC
CASENT0154467	MG-22-02	Pheidole	spinosa	Pheidole.MG147	1w.	pin	Rin'ha, Mike	2002-10-26	Toliara	Madagascar	85 m	-25.0067	46.3033	Malagasy	CASC, San Francisco, CA, USA	CASC
CASENT0154484	MG-22-07	Pheidole	spinosa	Pheidole.MGs132	1s.	pin	Rin'ha, Mike	2002-11-30	Toliara	Madagascar	85 m	-25.0067	46.3033	Malagasy	CASC, San Francisco, CA, USA	CASC
CASENT0154485	MG-22-07	Pheidole	spinosa	Pheidole.MG154	1w.	pin	Rin'ha, Mike	2002-11-30	Toliara	Madagascar	85 m	-25.0067	46.3033	Malagasy	CASC, San Francisco, CA, USA	CASC
CASENT0154560	MA-02-18B-30	Pheidole	spinosa	Pheidole.MG154	1w.	pin	R. Harin'Hala	2002-08-06	Tulear	Madagascar	37 m	-22.9133	43.4822	Malagasy	CASC, San Francisco, CA, USA	CASC
CASENT0155143	MG-22-06	Pheidole	spinosa	Pheidole.MG154	1w.	pin	Rin'ha, Mike	2002-11-23	Toliara	Madagascar	85 m	-25.0067	46.3033	Malagasy	CASC, San Francisco, CA, USA	CASC
CASENT0155163	MG-22-08	Pheidole	spinosa	Pheidole.MG147	1w.	pin	Rin'ha, Mike	2002-12-07	Toliara	Madagascar	85 m	-25.0067	46.3033	Malagasy	CASC, San Francisco, CA, USA	CASC
CASENT0155419	MG-22-10	Pheidole	spinosa	Pheidole.MG154	1w.	pin	Rin'ha, Mike	2002-12-16	Toliara	Madagascar	85 m	-25.0067	46.3033	Malagasy	CASC, San Francisco, CA, USA	CASC
CASENT0155938	BLF22820	Pheidole	spinosa	Pheidole.megacephala spinosa	1w.	pin	B.L.Fisher et al.	2009-10-20	Mahajanga	Madagascar	250 m	-18.0265	44.0505	Malagasy	CASC, San Francisco, CA, USA	CASC
CASENT0156014	BLF23065	Pheidole	spinosa	Pheidole.megacephala spinosa	1w.	pin	B.L.Fisher et al.	2009-10-31	Mahajanga	Madagascar	153 m	-17.8876	44.4727	Malagasy	CASC, San Francisco, CA, USA	CASC
CASENT0156482	BLF23040	Pheidole	spinosa	Pheidole.megacephala_beanka01	1s.	pin	B.L.Fisher et al.	2009-10-30	Mahajanga	Madagascar	140 m	-17.8802	44.4688	Malagasy	CASC, San Francisco, CA, USA	CASC
CASENT0156501	BLF22779	Pheidole	spinosa	Pheidole.megacephala_beanka01	1s.	pin	B.L.Fisher et al.	2009-10-18	Mahajanga	Madagascar	262 m	-18.0601	44.5409	Malagasy	CASC, San Francisco, CA, USA	CASC
CASENT0156533	BLF22775	Pheidole	spinosa	Pheidole.megacephala_beanka01	1w., 1s.	pin	B.L.Fisher et al.	2009-10-18	Mahajanga	Madagascar	262 m	-18.0601	44.5409	Malagasy	CASC, San Francisco, CA, USA	CASC
CASENT0156543	BLF22764	Pheidole	spinosa	Pheidole.megacephala spinosa	1w.	pin	B.L.Fisher et al.	2009-10-18	Mahajanga	Madagascar	262 m	-18.0601	44.5409	Malagasy	CASC, San Francisco, CA, USA	CASC
CASENT0156551	BLF22748	Pheidole	spinosa	Pheidole.megacephala_beanka01	1w., 1s.	pin	B.L.Fisher et al.	2009-10-18	Mahajanga	Madagascar	262 m	-18.0601	44.5409	Malagasy	CASC, San Francisco, CA, USA	CASC
CASENT0156614	BLF22900	Pheidole	spinosa	Pheidole.megacephala_beanka01	1w.	pin	B.L.Fisher et al.	2009-10-23	Mahajanga	Madagascar	250 m	-18.0265	44.0505	Malagasy	CASC, San Francisco, CA, USA	CASC
CASENT0156628	BLF22860	Pheidole	spinosa	Pheidole.megacephala_beanka01	1w., 1s.	pin	B.L.Fisher et al.	2009-10-21	Mahajanga	Madagascar	250 m	-18.0265	44.0505	Malagasy	CASC, San Francisco, CA, USA	CASC
CASENT0156631	BLF22841	Pheidole	spinosa	Pheidole.megacephala_beanka01	1w.	pin	B.L.Fisher et al.	2009-10-21	Mahajanga	Madagascar	250 m	-18.0265	44.0505	Malagasy	CASC, San Francisco, CA, USA	CASC
CASENT0156665	BLF22963	Pheidole	spinosa	Pheidole.megacephala_beanka01	1w., 1m.	pin	B.L.Fisher et al.	2009-10-25	Mahajanga	Madagascar	272 m	-18.0401	44.5339	Malagasy	CASC, San Francisco, CA, USA	CASC
CASENT0156684	BLF22970	Pheidole	spinosa	Pheidole.megacephala_beanka01	1w., 1s.	pin	B.L.Fisher et al.	2009-10-25	Mahajanga	Madagascar	272 m	-18.0401	44.5339	Malagasy	CASC, San Francisco, CA, USA	CASC
CASENT0156686	BLF22980	Pheidole	spinosa	Pheidole.megacephala_beanka01	1w., 1s.	pin	B.L.Fisher et al.	2009-10-25	Mahajanga	Madagascar	272 m	-18.0401	44.5339	Malagasy	CASC, San Francisco, CA, USA	CASC
CASENT0156725	BLF23101	Pheidole	spinosa	Pheidole.megacephala_beanka01	1w., 1s.	pin	B.L.Fisher et al.	2009-10-31	Mahajanga	Madagascar	153 m	-17.8876	44.4727	Malagasy	CASC, San Francisco, CA, USA	CASC
CASENT0156742	BLF22788	Pheidole	spinosa	Pheidole.megacephala_beanka01	1w.	pin	B.L.Fisher et al.	2009-10-19	Mahajanga	Madagascar	250 m	-18.0265	44.0505	Malagasy	CASC, San Francisco, CA, USA	CASC
CASENT0156803	BLF22787	Pheidole	spinosa	Pheidole.megacephala spinosa	1w.	pin	B.L.Fisher et al.	2009-10-19	Mahajanga	Madagascar	250 m	-18.0265	44.0505	Malagasy	CASC, San Francisco, CA, USA	CASC
CASENT0156883	BLF23030	Pheidole	spinosa	Pheidole.megacephala_beanka01	1w., 1s.	pin	B.L.Fisher et al.	2009-10-29	Mahajanga	Madagascar	140 m	-17.8802	44.4688	Malagasy	CASC, San Francisco, CA, USA	CASC
CASENT0156956	BLF22934	Pheidole	spinosa	Pheidole.megacephala_beanka01	1w., 1q.	pin	B.L.Fisher et al.	2009-10-24	Mahajanga	Madagascar	300 m	-18.0622	44.5259	Malagasy	CASC, San Francisco, CA, USA	CASC
CASENT0156965	BLF22939	Pheidole	spinosa	Pheidole.megacephala_beanka01	1w., 1s.	pin	B.L.Fisher et al.	2009-10-24	Mahajanga	Madagascar	300 m	-18.0622	44.5259	Malagasy	CASC, San Francisco, CA, USA	CASC
CASENT0156966	BLF22949	Pheidole	spinosa	Pheidole.megacephala_beanka01	1w., 1s.	pin	B.L.Fisher et al.	2009-10-24	Mahajanga	Madagascar	300 m	-18.0622	44.5259	Malagasy	CASC, San Francisco, CA, USA	CASC
CASENT0157091	BLF23000	Pheidole	spinosa	Pheidole.megacephala_beanka01	1w.	pin	B.L.Fisher et al.	2009-10-28	Mahajanga	Madagascar	140 m	-17.8802	44.4688	Malagasy	CASC, San Francisco, CA, USA	CASC
CASENT0157109	BLF23001	Pheidole	spinosa	Pheidole.megacephala spinosa	1w.	pin	B.L.Fisher et al.	2009-10-28	Mahajanga	Madagascar	140 m	-17.8802	44.4688	Malagasy	CASC, San Francisco, CA, USA	CASC
CASENT0157227	BLF22999	Pheidole	spinosa	Pheidole.megacephala spinosa	1w.	pin	B.L.Fisher et al.	2009-10-29	Mahajanga	Madagascar	140 m	-17.8802	44.4688	Malagasy	CASC, San Francisco, CA, USA	CASC
CASENT0157448	BLF22789	Pheidole	spinosa	Pheidole.megacephala spinosa	1w.	pin	B.L.Fisher et al.	2009-10-19	Mahajanga	Madagascar	250 m	-18.0265	44.0505	Malagasy	CASC, San Francisco, CA, USA	CASC
CASENT0157646	BLF22925	Pheidole	spinosa	Pheidole.megacephala_beanka01	1w.	pin	B.L.Fisher et al.	2009-10-24	Mahajanga	Madagascar	300 m	-18.0622	44.5259	Malagasy	CASC, San Francisco, CA, USA	CASC
CASENT0157681	BLF22925	Pheidole	spinosa	Pheidole.megacephala_beanka01	1s.	pin	B.L.Fisher et al.	2009-10-24	Mahajanga	Madagascar	300 m	-18.0622	44.5259	Malagasy	CASC, San Francisco, CA, USA	CASC
CASENT0158195	BLF22791	Pheidole	spinosa	Pheidole.megacephala	1w.	pin	B.L.Fisher et al.	2009-10-19	Mahajanga	Madagascar	250 m	-18.0213	44.4957	Malagasy	CASC, San Francisco, CA, USA	CASC
CASENT0158208	BLF22791	Pheidole	spinosa	Pheidole.megacephala	1s.	pin	B.L.Fisher et al.	2009-10-19	Mahajanga	Madagascar	250 m	-18.0213	44.4957	Malagasy	CASC, San Francisco, CA, USA	CASC
CASENT0158215	BLF22812	Pheidole	spinosa	Pheidole.megacephala	1w.	pin	B.L.Fisher et al.	2009-10-20	Mahajanga	Madagascar	250 m	-18.0213	44.4957	Malagasy	CASC, San Francisco, CA, USA	CASC
CASENT0158273	BLF22812	Pheidole	spinosa	Pheidole.megacephala	1w.	pin	B.L.Fisher et al.	2009-10-20	Mahajanga	Madagascar	250 m	-18.0213	44.4957	Malagasy	CASC, San Francisco, CA, USA	CASC
CASENT0158282	BLF22812	Pheidole	spinosa	Pheidole.megacephala spinosa	1s.	pin	B.L.Fisher et al.	2009-10-20	Mahajanga	Madagascar	250 m	-18.0213	44.4957	Malagasy	CASC, San Francisco, CA, USA	CASC
CASENT0158296	BLF22812	Pheidole	spinosa	Pheidole.megacephala spinosa	1w.	pin	B.L.Fisher et al.	2009-10-20	Mahajanga	Madagascar	250 m	-18.0213	44.4957	Malagasy	CASC, San Francisco, CA, USA	CASC
CASENT0158339	BLF22810	Pheidole	spinosa	Pheidole.megacephala	1w.	pin	B.L.Fisher et al.	2009-10-20	Mahajanga	Madagascar	250 m	-18.0213	44.4957	Malagasy	CASC, San Francisco, CA, USA	CASC
CASENT0158344	BLF22987	Pheidole	spinosa	Pheidole.megacephala	1w.	pin	B.L.Fisher et al.	2009-10-26	Mahajanga	Madagascar	250 m	-18.0247	44.4879	Malagasy	CASC, San Francisco, CA, USA	CASC
CASENT0158373	BLF22924	Pheidole	spinosa	Pheidole.megacephala	1w.	pin	B.L.Fisher et al.	2009-10-24	Mahajanga	Madagascar	250 m	-18.0213	44.4957	Malagasy	CASC, San Francisco, CA, USA	CASC
CASENT0158419	BLF22924	Pheidole	spinosa	Pheidole.megacephala	1w.	pin	B.L.Fisher et al.	2009-10-24	Mahajanga	Madagascar	250 m	-18.0213	44.4957	Malagasy	CASC, San Francisco, CA, USA	CASC
CASENT0158450	BLF22988	Pheidole	spinosa	Pheidole.megacephala	1w.	pin	B.L.Fisher et al.	2009-10-26	Mahajanga	Madagascar	250 m	-18.0247	44.4879	Malagasy	CASC, San Francisco, CA, USA	CASC
CASENT0158458	BLF22989	Pheidole	spinosa	Pheidole.megacephala	1w.	pin	B.L.Fisher et al.	2009-10-26	Mahajanga	Madagascar	250 m	-18.0247	44.4879	Malagasy	CASC, San Francisco, CA, USA	CASC
CASENT0158490	BLF22989	Pheidole	spinosa	Pheidole.megacephala	1w.	pin	B.L.Fisher et al.	2009-10-26	Mahajanga	Madagascar	250 m	-18.0247	44.4879	Malagasy	CASC, San Francisco, CA, USA	CASC
CASENT0158511	BLF22989	Pheidole	spinosa	Pheidole.megacephala spinosa	1w.	pin	B.L.Fisher et al.	2009-10-26	Mahajanga	Madagascar	250 m	-18.0247	44.4879	Malagasy	CASC, San Francisco, CA, USA	CASC
CASENT0158512	BLF22989	Pheidole	spinosa	Pheidole.megacephala	1s.	pin	B.L.Fisher et al.	2009-10-26	Mahajanga	Madagascar	250 m	-18.0247	44.4879	Malagasy	CASC, San Francisco, CA, USA	CASC
CASENT0158562	BLF22987	Pheidole	spinosa	Pheidole.megacephala	1w.	pin	B.L.Fisher et al.	2009-10-26	Mahajanga	Madagascar	250 m	-18.0247	44.4879	Malagasy	CASC, San Francisco, CA, USA	CASC
CASENT0164579	BLF22997	Pheidole	spinosa	Pheidole.megacephala	1w.	pin	B.L.Fisher et al.	2009-10-30	Mahajanga	Madagascar	160 m	-17.8873	44.4711	Malagasy	CASC, San Francisco, CA, USA	CASC
CASENT0164593	BLF22997	Pheidole	spinosa	Pheidole.megacephala	1w.	pin	B.L.Fisher et al.	2009-10-30	Mahajanga	Madagascar	160 m	-17.8873	44.4711	Malagasy	CASC, San Francisco, CA, USA	CASC
CASENT0164626	BLF22997	Pheidole	spinosa	Pheidole.megacephala	1w.	pin	B.L.Fisher et al.	2009-10-30	Mahajanga	Madagascar	160 m	-17.8873	44.4711	Malagasy	CASC, San Francisco, CA, USA	CASC
CASENT0164661	BLF22998	Pheidole	spinosa	Pheidole.megacephala	1s.	pin	B.L.Fisher et al.	2009-10-31	Mahajanga	Madagascar	160 m	-17.8873	44.4711	Malagasy	CASC, San Francisco, CA, USA	CASC
CASENT0164684	BLF22998	Pheidole	spinosa	Pheidole.megacephala spinosa	1w.	pin	B.L.Fisher et al.	2009-10-31	Mahajanga	Madagascar	160 m	-17.8873	44.4711	Malagasy	CASC, San Francisco, CA, USA	CASC
CASENT0164698	BLF22995	Pheidole	spinosa	Pheidole.megacephala	1w.	pin	B.L.Fisher et al.	2009-10-31	Mahajanga	Madagascar	160 m	-17.8873	44.4711	Malagasy	CASC, San Francisco, CA, USA	CASC
CASENT0164699	BLF22995	Pheidole	spinosa	Pheidole.megacephala	1s.	pin	B.L.Fisher et al.	2009-10-31	Mahajanga	Madagascar	160 m	-17.8873	44.4711	Malagasy	CASC, San Francisco, CA, USA	CASC
CASENT0164749	BLF22996	Pheidole	spinosa	Pheidole.megacephala	1w.	pin	B.L.Fisher et al.	2009-10-30	Mahajanga	Madagascar	160 m	-17.8873	44.4711	Malagasy	CASC, San Francisco, CA, USA	CASC
CASENT0164850	BLF22791	Pheidole	spinosa	Pheidole.megacephala	1w.	pin	B.L.Fisher et al.	2009-10-19	Mahajanga	Madagascar	250 m	-18.0213	44.4957	Malagasy	CASC, San Francisco, CA, USA	CASC
CASENT0165685	BLF22994	Pheidole	spinosa	Pheidole.megacephala	1w.	pin	B.L.Fisher et al.	2009-10-29	Mahajanga	Madagascar	160 m	-17.8873	44.4711	Malagasy	CASC, San Francisco, CA, USA	CASC
CASENT0167849	BLF22791	Pheidole	spinosa	Pheidole.megacephala	1w.	pin	B.L.Fisher et al.	2009-10-19	Mahajanga	Madagascar	250 m	-18.0213	44.4957	Malagasy	CASC, San Francisco, CA, USA	CASC
CASENT0196895	HJR090	Pheidole	spinosa	Pheidole.MGs130	2s.	pin	H.J.Ratsirarson	1998-12-16	Toamasina	Madagascar	960 m	-18.1983	48.5783	Malagasy	CASC, San Francisco, CA, USA	CASC
CASENT0196896	BLF01996	Pheidole	spinosa	Pheidole.MGs130	1s.	pin	B.L.Fisher	1998-11-08	Antsiranana	Madagascar	400 m	-13.9617	48.4333	Malagasy	CASC, San Francisco, CA, USA	CASC
CASENT0198045	BLF00486	Pheidole	spinosa	Pheidole.MGs123	1s.	pin	B.L.Fisher	1992-11-15	Toliara	Madagascar	420 m	-24.5667	46.8167	Malagasy	CASC, San Francisco, CA, USA	CASC
CASENT0198046	BLF01938	Pheidole	spinosa	Pheidole.MGs128	1s.	pin	B.L.Fisher	1998-10-20	Antsiranana	Madagascar	1175 m	-13.9983	48.4283	Malagasy	CASC, San Francisco, CA, USA	CASC
CASENT0198047	BLF02072	Pheidole	spinosa	Pheidole.MGs129	1s.	pin	B.L.Fisher	1998-11-22	Toliara	Madagascar	10 m	-25.0617	46.87	Malagasy	CASC, San Francisco, CA, USA	CASC
CASENT0198048	BLF02072	Pheidole	spinosa	Pheidole.MGs129	1s.	pin	B.L.Fisher	1998-11-22	Toliara	Madagascar	10 m	-25.0617	46.87	Malagasy	CASC, San Francisco, CA, USA	CASC
CASENT0198241	BLF01938	Pheidole	spinosa	Pheidole.MG145	1w.	pin	B.L.Fisher	1998-10-20	Antsiranana	Madagascar	1175 m	-13.9983	48.4283	Malagasy	CASC, San Francisco, CA, USA	CASC
CASENT0198243	BLF02040	Pheidole	spinosa	Pheidole.MG147	1w.	pin	B.L.Fisher	1998-11-20	Toliara	Madagascar	20 m	-24.9517	47.0017	Malagasy	CASC, San Francisco, CA, USA	CASC
CASENT0198244	BLF01312	Pheidole	spinosa	Pheidole.MG147	1w.	pin	B.L.Fisher	1996-01-21	Toliara	Madagascar	730 m	-22.4667	44.85	Malagasy	CASC, San Francisco, CA, USA	CASC
CASENT0198245	BLF01511	Pheidole	spinosa	Pheidole.MG147	2w., 1s.	pin	B.L.Fisher	1997-04-27	Toliara	Madagascar	175 m	-23.6833	44.6333	Malagasy	CASC, San Francisco, CA, USA	CASC
CASENT0198246	BLF00953	Pheidole	spinosa	Pheidole.MG148	1w., 1s.	pin	B.L.Fisher	1993-11-23	Toamasina	Madagascar	25 m	-15.6813	49.958	Malagasy	CASC, San Francisco, CA, USA	CASC
CASENT0198247	BLF01945	Pheidole	spinosa	Pheidole.MG148	1w.	pin	B.L.Fisher	1998-10-21	Antsiranana	Madagascar	1175 m	-13.9983	48.4283	Malagasy	CASC, San Francisco, CA, USA	CASC
CASENT0198248	BLF02072	Pheidole	spinosa	Pheidole.MG148	1w.	pin	B.L.Fisher	1998-11-22	Toliara	Madagascar	10 m	-25.0617	46.87	Malagasy	CASC, San Francisco, CA, USA	CASC
CASENT0198249	BLF01945	Pheidole	spinosa	Pheidole.MG148	1w.	pin	B.L.Fisher	1998-10-21	Antsiranana	Madagascar	1175 m	-13.9983	48.4283	Malagasy	CASC, San Francisco, CA, USA	CASC
CASENT0198250	BLF01938	Pheidole	spinosa	Pheidole.MG148	1w.	pin	B.L.Fisher	1998-10-20	Antsiranana	Madagascar	1175 m	-13.9983	48.4283	Malagasy	CASC, San Francisco, CA, USA	CASC
CASENT0198251	BLF01313	Pheidole	spinosa	Pheidole.MG150	1w., 1s.	pin	B.L.Fisher	1996-01-21	Toliara	Madagascar	730 m	-22.4667	44.85	Malagasy	CASC, San Francisco, CA, USA	CASC
CASENT0198252	BLF02040	Pheidole	spinosa	Pheidole.MG150	3w.	pin	B.L.Fisher	1998-11-20	Toliara	Madagascar	20 m	-24.9517	47.0017	Malagasy	CASC, San Francisco, CA, USA	CASC
CASENT0198254	BLF02070	Pheidole	spinosa	Pheidole.MG150	1w.	pin	B.L.Fisher	1998-11-21	Toliara	Madagascar	20 m	-24.7717	47.1717	Malagasy	CASC, San Francisco, CA, USA	CASC
CASENT0198255	BLF01945	Pheidole	spinosa	Pheidole.MG150	1w., 1s.	pin	B.L.Fisher	1998-10-21	Antsiranana	Madagascar	1175 m	-13.9983	48.4283	Malagasy	CASC, San Francisco, CA, USA	CASC
CASENT0198256	BLF01873	Pheidole	spinosa	Pheidole.MG150	2w., 1s.	pin	B.L.Fisher	1998-10-11	Antsiranana	Madagascar	780 m	-13.9767	48.4233	Malagasy	CASC, San Francisco, CA, USA	CASC
CASENT0198257	BLF02033	Pheidole	spinosa	Pheidole.MG150	2s.	pin	B.L.Fisher	1998-11-08	Antsiranana	Madagascar	400 m	-13.9617	48.4333	Malagasy	CASC, San Francisco, CA, USA	CASC
CASENT0198258	BLF02072	Pheidole	spinosa	Pheidole.MG150	1w.	pin	B.L.Fisher	1998-11-22	Toliara	Madagascar	10 m	-25.0617	46.87	Malagasy	CASC, San Francisco, CA, USA	CASC
CASENT0198259	BLF02069	Pheidole	spinosa	Pheidole.MG150	4w.	pin	B.L.Fisher	1998-11-21	Toliara	Madagascar	20 m	-24.7717	47.1717	Malagasy	CASC, San Francisco, CA, USA	CASC
CASENT0198260	BLF02102	Pheidole	spinosa	Pheidole.MG150	1w.	pin	B.L.Fisher (J.-Baptiste)	1998-12-09	Toliara	Madagascar	20 m	-24.7717	47.1717	Malagasy	CASC, San Francisco, CA, USA	CASC
CASENT0198261	BLF02058	Pheidole	spinosa	Pheidole.MG150	3w.	pin	B.L.Fisher	1998-11-21	Toliara	Madagascar	20 m	-24.7717	47.1717	Malagasy	CASC, San Francisco, CA, USA	CASC
CASENT0198262	HJR131	Pheidole	spinosa	Pheidole.MG150	1w.	pin	H.J.Ratsirarson	1998-12-16	Toamasina	Madagascar	960 m	-18.1983	48.5783	Malagasy	CASC, San Francisco, CA, USA	CASC
CASENT0198263	BLF00926	Pheidole	spinosa	Pheidole.MG150	2w.	pin	B.L.Fisher	1993-11-21	Toamasina	Madagascar	425 m	-15.6713	49.974	Malagasy	CASC, San Francisco, CA, USA	CASC
CASENT0198264	BLF00886	Pheidole	spinosa	Pheidole.MG150	2w.	pin	B.L.Fisher	1993-11-14	Toamasina	Madagascar	25 m	-15.6813	49.958	Malagasy	CASC, San Francisco, CA, USA	CASC
CASENT0198265	BLF00486	Pheidole	spinosa	Pheidole.MG150	3w.	pin	B.L.Fisher	1992-11-15	Toliara	Madagascar	420 m	-24.5667	46.8167	Malagasy	CASC, San Francisco, CA, USA	CASC
CASENT0198266	BLF00902	Pheidole	spinosa	Pheidole.MG150	3w.	pin	B.L.Fisher	1993-11-15	Toamasina	Madagascar	150 m	-15.6813	49.958	Malagasy	CASC, San Francisco, CA, USA	CASC
CASENT0198267	BLF01862	Pheidole	spinosa	Pheidole.MG150	1w.	pin	B.L.Fisher	1998-10-11	Antsiranana	Madagascar	780 m	-13.9767	48.4233	Malagasy	CASC, San Francisco, CA, USA	CASC
CASENT0198268	BLF01476	Pheidole	spinosa	Pheidole.MG150	1w.	pin	B.L.Fisher	1997-04-23	Toliara	Madagascar	135 m	-23.65	44.6333	Malagasy	CASC, San Francisco, CA, USA	CASC
CASENT0198269	BLF01474	Pheidole	spinosa	Pheidole.MG150	1w.	pin	B.L.Fisher	1997-04-23	Toliara	Madagascar	135 m	-23.65	44.6333	Malagasy	CASC, San Francisco, CA, USA	CASC
CASENT0198275	BLF01868	Pheidole	spinosa	Pheidole.MG150	3w.	pin	B.L.Fisher	1998-10-11	Antsiranana	Madagascar	780 m	-13.9767	48.4233	Malagasy	CASC, San Francisco, CA, USA	CASC
CASENT0198276	BLF01996	Pheidole	spinosa	Pheidole.MG151	1w.	pin	B.L.Fisher	1998-11-08	Antsiranana	Madagascar	400 m	-13.9617	48.4333	Malagasy	CASC, San Francisco, CA, USA	CASC
CASENT0198277	BLF01998	Pheidole	spinosa	Pheidole.MG151	1w.	pin	B.L.Fisher	1998-11-08	Antsiranana	Madagascar	400 m	-13.9617	48.4333	Malagasy	CASC, San Francisco, CA, USA	CASC
CASENT0198278	BLF01945	Pheidole	spinosa	Pheidole.MG151	1w.	pin	B.L.Fisher	1998-10-21	Antsiranana	Madagascar	1175 m	-13.9983	48.4283	Malagasy	CASC, San Francisco, CA, USA	CASC
CASENT0198279	BLF01938	Pheidole	spinosa	Pheidole.MG151	1w.	pin	B.L.Fisher	1998-10-20	Antsiranana	Madagascar	1175 m	-13.9983	48.4283	Malagasy	CASC, San Francisco, CA, USA	CASC
CASENT0198280	BLF01862	Pheidole	spinosa	Pheidole.MG151	1w.	pin	B.L.Fisher	1998-10-11	Antsiranana	Madagascar	780 m	-13.9767	48.4233	Malagasy	CASC, San Francisco, CA, USA	CASC
CASENT0198281	BLF01970	Pheidole	spinosa	Pheidole.MG151	2w.	pin	B.L.Fisher	1998-10-27	Antsiranana	Madagascar	1580 m	-14.0217	48.4183	Malagasy	CASC, San Francisco, CA, USA	CASC
CASENT0198282	BLF02033	Pheidole	spinosa	Pheidole.MG151	3w.	pin	B.L.Fisher	1998-11-08	Antsiranana	Madagascar	400 m	-13.9617	48.4333	Malagasy	CASC, San Francisco, CA, USA	CASC
CASENT0198283	BLF01888	Pheidole	spinosa	Pheidole.MG151	1w.	pin	B.L.Fisher	1998-10-12	Antsiranana	Madagascar	780 m	-13.9767	48.4233	Malagasy	CASC, San Francisco, CA, USA	CASC
CASENT0198284	BLF00476	Pheidole	spinosa	Pheidole.MG151	1w., 1s., 1q.	pin	B.L.Fisher	1992-11-12	Toliara	Madagascar	350 m	-24.75	46.8	Malagasy	CASC, San Francisco, CA, USA	CASC
CASENT0198285	BLF02102	Pheidole	spinosa	Pheidole.MG151	2w.	pin	B.L.Fisher (J.-Baptiste)	1998-12-09	Toliara	Madagascar	20 m	-24.7717	47.1717	Malagasy	CASC, San Francisco, CA, USA	CASC
CASENT0198286	BLF02040	Pheidole	spinosa	Pheidole.MG151	1w.	pin	B.L.Fisher	1998-11-20	Toliara	Madagascar	20 m	-24.9517	47.0017	Malagasy	CASC, San Francisco, CA, USA	CASC
CASENT0198287	BLF02072	Pheidole	spinosa	Pheidole.MG151	1w.	pin	B.L.Fisher	1998-11-22	Toliara	Madagascar	10 m	-25.0617	46.87	Malagasy	CASC, San Francisco, CA, USA	CASC
CASENT0198288	BLF01476	Pheidole	spinosa	Pheidole.MG151	1w.	pin	B.L.Fisher	1997-04-23	Toliara	Madagascar	135 m	-23.65	44.6333	Malagasy	CASC, San Francisco, CA, USA	CASC
CASENT0198289	BLF00926	Pheidole	spinosa	Pheidole.MG151	2w.	pin	B.L.Fisher	1993-11-21	Toamasina	Madagascar	425 m	-15.6713	49.974	Malagasy	CASC, San Francisco, CA, USA	CASC
CASENT0198290	BLF01882	Pheidole	spinosa	Pheidole.MG151	1w., 1s.	pin	B.L.Fisher	1998-10-11	Antsiranana	Madagascar	780 m	-13.9767	48.4233	Malagasy	CASC, San Francisco, CA, USA	CASC
CASENT0198291	BLF00886	Pheidole	spinosa	Pheidole.MG151	2w.	pin	B.L.Fisher	1993-11-14	Toamasina	Madagascar	25 m	-15.6813	49.958	Malagasy	CASC, San Francisco, CA, USA	CASC
CASENT0198292	BLF00555	Pheidole	spinosa	Pheidole.MG151	1w., 2s.	pin	B.L.Fisher	1992-11-28	Toliara	Madagascar	420 m	-24.5667	46.8167	Malagasy	CASC, San Francisco, CA, USA	CASC
CASENT0198293	BLF01382	Pheidole	spinosa	Pheidole.MG151	1w., 2s.	pin	B.L.Fisher	1997-04-06	Toamasina	Madagascar	10 m	-17.2825	49.43	Malagasy	CASC, San Francisco, CA, USA	CASC
CASENT0198294	BLF01476	Pheidole	spinosa	Pheidole.MG154	4w.	pin	B.L.Fisher	1997-04-23	Toliara	Madagascar	135 m	-23.65	44.6333	Malagasy	CASC, San Francisco, CA, USA	CASC
CASENT0198295	BLF01474	Pheidole	spinosa	Pheidole.MG154	1w.	pin	B.L.Fisher	1997-04-23	Toliara	Madagascar	135 m	-23.65	44.6333	Malagasy	CASC, San Francisco, CA, USA	CASC
CASENT0198296	BLF02072	Pheidole	spinosa	Pheidole.MG154	1w.	pin	B.L.Fisher	1998-11-22	Toliara	Madagascar	10 m	-25.0617	46.87	Malagasy	CASC, San Francisco, CA, USA	CASC
CASENT0198297	BLF01507	Pheidole	spinosa	Pheidole.MG154	2w., 1s.	pin	B.L.Fisher	1997-04-27	Toliara	Madagascar	175 m	-23.6833	44.6333	Malagasy	CASC, San Francisco, CA, USA	CASC
CASENT0198298	BLF01519	Pheidole	spinosa	Pheidole.MG154	2w., 1s.	pin	B.L.Fisher	1997-04-27	Toliara	Madagascar	175 m	-23.6833	44.6333	Malagasy	CASC, San Francisco, CA, USA	CASC
CASENT0198299	BLF02040	Pheidole	spinosa	Pheidole.MG154	1w.	pin	B.L.Fisher	1998-11-20	Toliara	Madagascar	20 m	-24.9517	47.0017	Malagasy	CASC, San Francisco, CA, USA	CASC
CASENT0198300	BLF00517	Pheidole	spinosa	Pheidole.MG154	3w.	pin	B.L.Fisher	1992-11-24	Toliara	Madagascar	425 m	-24.5667	46.8167	Malagasy	CASC, San Francisco, CA, USA	CASC
CASENT0198301	BLF01618	Pheidole	spinosa	Pheidole.MG154	1w.	pin	B.L.Fisher	1998-01-11	Fianarantsoa	Madagascar	1670 m	-20.775	47.1683	Malagasy	CASC, San Francisco, CA, USA	CASC
CASENT0198302	BLF02052	Pheidole	spinosa	Pheidole.MG154	3w.	pin	B.L.Fisher	1998-11-21	Toliara	Madagascar	20 m	-24.7717	47.1717	Malagasy	CASC, San Francisco, CA, USA	CASC
CASENT0198304	HJR112	Pheidole	spinosa	Pheidole.MG154	2w.	pin	H.J.Ratsirarson	1998-11-28	Toamasina	Madagascar	895 m	-18.7917	48.4267	Malagasy	CASC, San Francisco, CA, USA	CASC
CASENT0198305	BLF01312	Pheidole	spinosa	Pheidole.MG154	1w.	pin	B.L.Fisher	1996-01-21	Toliara	Madagascar	730 m	-22.4667	44.85	Malagasy	CASC, San Francisco, CA, USA	CASC
CASENT0198306	BLF01938	Pheidole	spinosa	Pheidole.MG154	1w.	pin	B.L.Fisher	1998-10-20	Antsiranana	Madagascar	1175 m	-13.9983	48.4283	Malagasy	CASC, San Francisco, CA, USA	CASC
CASENT0198307	BLF02086	Pheidole	spinosa	Pheidole.MG154	2w.	pin	B.L.Fisher	1998-11-22	Toliara	Madagascar	10 m	-25.0617	46.87	Malagasy	CASC, San Francisco, CA, USA	CASC
CASENT0198308	BLF02102	Pheidole	spinosa	Pheidole.MG154	1w.	pin	B.L.Fisher (J.-Baptiste)	1998-12-09	Toliara	Madagascar	20 m	-24.7717	47.1717	Malagasy	CASC, San Francisco, CA, USA	CASC
CASENT0198309	HJR090	Pheidole	spinosa	Pheidole.MG155	2w., 1s.	pin	H.J.Ratsirarson	1998-12-16	Toamasina	Madagascar	960 m	-18.1983	48.5783	Malagasy	CASC, San Francisco, CA, USA	CASC
CASENT0198310	BLF02040	Pheidole	spinosa	Pheidole.MG155	3w.	pin	B.L.Fisher	1998-11-20	Toliara	Madagascar	20 m	-24.9517	47.0017	Malagasy	CASC, San Francisco, CA, USA	CASC
CASENT0198311	BLF02072	Pheidole	spinosa	Pheidole.MG155	1w.	pin	B.L.Fisher	1998-11-22	Toliara	Madagascar	10 m	-25.0617	46.87	Malagasy	CASC, San Francisco, CA, USA	CASC
CASENT0198312	BLF01474	Pheidole	spinosa	Pheidole.MG155	1w.	pin	B.L.Fisher	1997-04-23	Toliara	Madagascar	135 m	-23.65	44.6333	Malagasy	CASC, San Francisco, CA, USA	CASC
CASENT0198314	BLF01625	Pheidole	spinosa	Pheidole.MG158	1w., 1s.	pin	B.L.Fisher	1998-01-14	Fianarantsoa	Madagascar	1670 m	-20.775	47.1683	Malagasy	CASC, San Francisco, CA, USA	CASC
CASENT0198315	BLF01627	Pheidole	spinosa	Pheidole.MG158	1w., 1s.	pin	B.L.Fisher	1998-01-14	Fianarantsoa	Madagascar	1670 m	-20.775	47.1683	Malagasy	CASC, San Francisco, CA, USA	CASC
CASENT0198316	BLF01623	Pheidole	spinosa	Pheidole.MG158	1w.	pin	B.L.Fisher	1998-01-13	Fianarantsoa	Madagascar	1670 m	-20.775	47.1683	Malagasy	CASC, San Francisco, CA, USA	CASC
CASENT0198317	BLF01629	Pheidole	spinosa	Pheidole.MG158	1w., 1s.	pin	B.L.Fisher	1998-01-15	Fianarantsoa	Madagascar	1600 m	-20.77	47.1867	Malagasy	CASC, San Francisco, CA, USA	CASC
CASENT0198318	BLF01595	Pheidole	spinosa	Pheidole.MG158	1w., 1s.	pin	B.L.Fisher	1998-01-09	Fianarantsoa	Madagascar	1670 m	-20.775	47.1683	Malagasy	CASC, San Francisco, CA, USA	CASC
CASENT0198319	BLF01598	Pheidole	spinosa	Pheidole.MG158	1w., 2s.	pin	B.L.Fisher	1998-01-09	Fianarantsoa	Madagascar	1670 m	-20.775	47.1683	Malagasy	CASC, San Francisco, CA, USA	CASC
CASENT0198320	BLF01611	Pheidole	spinosa	Pheidole.MG158	1w., 2s.	pin	B.L.Fisher	1998-01-09	Fianarantsoa	Madagascar	1670 m	-20.775	47.1683	Malagasy	CASC, San Francisco, CA, USA	CASC
CASENT0198321	BLF01620	Pheidole	spinosa	Pheidole.MG158	1w., 1s.	pin	B.L.Fisher	1998-01-11	Fianarantsoa	Madagascar	1670 m	-20.775	47.1683	Malagasy	CASC, San Francisco, CA, USA	CASC
CASENT0198325	BLF01470	Pheidole	spinosa	Pheidole.MG158	2w., 1s.	pin	B.L.Fisher	1997-04-23	Toliara	Madagascar	135 m	-23.65	44.6333	Malagasy	CASC, San Francisco, CA, USA	CASC
CASENT0198326	BLF01312	Pheidole	spinosa	Pheidole.MG158	1w.	pin	B.L.Fisher	1996-01-21	Toliara	Madagascar	730 m	-22.4667	44.85	Malagasy	CASC, San Francisco, CA, USA	CASC
CASENT0198327	BLF01482	Pheidole	spinosa	Pheidole.MG158	1w.	pin	B.L.Fisher	1997-04-25	Toliara	Madagascar	170 m	-22.6833	44.5833	Malagasy	CASC, San Francisco, CA, USA	CASC
CASENT0198336	BLF01755	Pheidole	spinosa	Pheidole.MG158	3w.	pin	B.L.Fisher (Sylvain)	1997-11-03	Fianarantsoa	Madagascar	1200 m	-22.4217	46.8983	Malagasy	CASC, San Francisco, CA, USA	CASC
CASENT0198339	BLF01752	Pheidole	spinosa	Pheidole.MG158	2w.	pin	B.L.Fisher (Sylvain)	1997-10-24	Fianarantsoa	Madagascar	1575 m	-22.4967	46.955	Malagasy	CASC, San Francisco, CA, USA	CASC
CASENT0198934	BLF01476	Pheidole	spinosa	Pheidole.MGs122	1s.	pin	B.L.Fisher	1997-04-23	Toliara	Madagascar	135 m	-23.65	44.6333	Malagasy	CASC, San Francisco, CA, USA	CASC
CASENT0198935	BLF02102	Pheidole	spinosa	Pheidole.MGs122	1s.	pin	B.L.Fisher (J.-Baptiste)	1998-12-09	Toliara	Madagascar	20 m	-24.7717	47.1717	Malagasy	CASC, San Francisco, CA, USA	CASC
CASENT0198936	BLF01755	Pheidole	spinosa	Pheidole.MGs122	2s.	pin	B.L.Fisher (Sylvain)	1997-11-03	Fianarantsoa	Madagascar	1200 m	-22.4217	46.8983	Malagasy	CASC, San Francisco, CA, USA	CASC
CASENT0198946	BLF01938	Pheidole	spinosa	Pheidole.MG145	1w.	pin	B.L.Fisher	1998-10-20	Antsiranana	Madagascar	1175 m	-13.9983	48.4283	Malagasy	CASC, San Francisco, CA, USA	CASC
CASENT0198947	BLF02072	Pheidole	spinosa	Pheidole.MG150	1w.	pin	B.L.Fisher	1998-11-22	Toliara	Madagascar	10 m	-25.0617	46.87	Malagasy	CASC, San Francisco, CA, USA	CASC
CASENT0198954	BLF01862	Pheidole	spinosa	Pheidole.MGs122	1s.	pin	B.L.Fisher	1998-10-11	Antsiranana	Madagascar	780 m	-13.9767	48.4233	Malagasy	CASC, San Francisco, CA, USA	CASC
CASENT0198955	BLF01938	Pheidole	spinosa	Pheidole.MGs122	1s.	pin	B.L.Fisher	1998-10-20	Antsiranana	Madagascar	1175 m	-13.9983	48.4283	Malagasy	CASC, San Francisco, CA, USA	CASC
CASENT0198956	BLF02072	Pheidole	spinosa	Pheidole.MGs123	1s.	pin	B.L.Fisher	1998-11-22	Toliara	Madagascar	10 m	-25.0617	46.87	Malagasy	CASC, San Francisco, CA, USA	CASC
CASENT0198957	BLF02086	Pheidole	spinosa	Pheidole.MGs123	3s.	pin	B.L.Fisher	1998-11-22	Toliara	Madagascar	10 m	-25.0617	46.87	Malagasy	CASC, San Francisco, CA, USA	CASC
CASENT0198958	BLF01752	Pheidole	spinosa	Pheidole.MGs123	2s.	pin	B.L.Fisher (Sylvain)	1997-10-24	Fianarantsoa	Madagascar	1575 m	-22.4967	46.955	Malagasy	CASC, San Francisco, CA, USA	CASC
CASENT0198959	BLF01868	Pheidole	spinosa	Pheidole.MGs123	3s.	pin	B.L.Fisher	1998-10-11	Antsiranana	Madagascar	780 m	-13.9767	48.4233	Malagasy	CASC, San Francisco, CA, USA	CASC
CASENT0198960	BLF02072	Pheidole	spinosa	Pheidole.MGs128	1s.	pin	B.L.Fisher	1998-11-22	Toliara	Madagascar	10 m	-25.0617	46.87	Malagasy	CASC, San Francisco, CA, USA	CASC
CASENT0198961	BLF01996	Pheidole	spinosa	Pheidole.MGs128	1s.	pin	B.L.Fisher	1998-11-08	Antsiranana	Madagascar	400 m	-13.9617	48.4333	Malagasy	CASC, San Francisco, CA, USA	CASC
CASENT0198962	BLF01862	Pheidole	spinosa	Pheidole.MGs128	1s.	pin	B.L.Fisher	1998-10-11	Antsiranana	Madagascar	780 m	-13.9767	48.4233	Malagasy	CASC, San Francisco, CA, USA	CASC
CASENT0198963	BLF01942	Pheidole	spinosa	Pheidole.MGs128	1s.	pin	B.L.Fisher	1998-10-19	Antsiranana	Madagascar	1175 m	-13.9983	48.4283	Malagasy	CASC, San Francisco, CA, USA	CASC
CASENT0198964	BLF01945	Pheidole	spinosa	Pheidole.MGs128	1s.	pin	B.L.Fisher	1998-10-21	Antsiranana	Madagascar	1175 m	-13.9983	48.4283	Malagasy	CASC, San Francisco, CA, USA	CASC
CASENT0198965	BLF02058	Pheidole	spinosa	Pheidole.MGs128	3s.	pin	B.L.Fisher	1998-11-21	Toliara	Madagascar	20 m	-24.7717	47.1717	Malagasy	CASC, San Francisco, CA, USA	CASC
CASENT0198966	BLF02040	Pheidole	spinosa	Pheidole.MGs128	2s.	pin	B.L.Fisher	1998-11-20	Toliara	Madagascar	20 m	-24.9517	47.0017	Malagasy	CASC, San Francisco, CA, USA	CASC
CASENT0198967	BLF02052	Pheidole	spinosa	Pheidole.MGs128	2s.	pin	B.L.Fisher	1998-11-21	Toliara	Madagascar	20 m	-24.7717	47.1717	Malagasy	CASC, San Francisco, CA, USA	CASC
CASENT0198968	BLF02040	Pheidole	spinosa	Pheidole.MGs129	1s.	pin	B.L.Fisher	1998-11-20	Toliara	Madagascar	20 m	-24.9517	47.0017	Malagasy	CASC, San Francisco, CA, USA	CASC
CASENT0198969	BLF01862	Pheidole	spinosa	Pheidole.MGs130	1s.	pin	B.L.Fisher	1998-10-11	Antsiranana	Madagascar	780 m	-13.9767	48.4233	Malagasy	CASC, San Francisco, CA, USA	CASC
CASENT0198970	BLF01938	Pheidole	spinosa	Pheidole.MGs130	1s.	pin	B.L.Fisher	1998-10-20	Antsiranana	Madagascar	1175 m	-13.9983	48.4283	Malagasy	CASC, San Francisco, CA, USA	CASC
CASENT0204394	BLF25440	Pheidole	spinosa	Pheidole.makay07	2w.	pin	B.L.Fisher et al.	2010-11-28	Toliara	Madagascar	480 m	-21.2234	45.3263	Malagasy	CASC, San Francisco, CA, USA	CASC
CASENT0205701	BLF25751	Pheidole	spinosa	Pheidole.makay07	2w.	pin	B.L.Fisher et al.	2010-12-08	Toliara	Madagascar	500 m	-21.2586	45.1641	Malagasy	CASC, San Francisco, CA, USA	CASC
CASENT0206153	BLF25700	Pheidole	spinosa	Pheidole.makay07	1w., 1s.	pin	B.L.Fisher et al.	2010-12-06	Toliara	Madagascar	575 m	-21.3133	45.1452	Malagasy	CASC, San Francisco, CA, USA	CASC
CASENT0206154	BLF25723	Pheidole	spinosa	Pheidole.makay07	2w.	pin	B.L.Fisher et al.	2010-12-06	Toliara	Madagascar	575 m	-21.3133	45.1452	Malagasy	CASC, San Francisco, CA, USA	CASC
CASENT0206159	BLF25719	Pheidole	spinosa	Pheidole.makay08	2w.	pin	B.L.Fisher et al.	2010-12-06	Toliara	Madagascar	575 m	-21.3133	45.1452	Malagasy	CASC, San Francisco, CA, USA	CASC
CASENT0206167	BLF25706	Pheidole	spinosa	Pheidole.makay08	1w.	pin	B.L.Fisher et al.	2010-12-06	Toliara	Madagascar	575 m	-21.3133	45.1452	Malagasy	CASC, San Francisco, CA, USA	CASC
CASENT0210297	BLF25359	Pheidole	spinosa	Pheidole.makay07	1w.	pin	B.L.Fisher et al.	2010-11-27	Toliara	Madagascar	525 m	-21.2098	45.3418	Malagasy	CASC, San Francisco, CA, USA	CASC
CASENT0210299	BLF25359	Pheidole	spinosa	Pheidole.makay07	1w.	pin	B.L.Fisher et al.	2010-11-27	Toliara	Madagascar	525 m	-21.2098	45.3418	Malagasy	CASC, San Francisco, CA, USA	CASC
CASENT0210770	BLF25204	Pheidole	spinosa	Pheidole.makay07	1w.	pin	B.L.Fisher et al.	2010-11-24	Toliara	Madagascar	510 m	-21.2184	45.3106	Malagasy	CASC, San Francisco, CA, USA	CASC
CASENT0212407	BLF27091	Pheidole	spinosa	Pheidole.megacephala_MG151	2w.	pin	B.L.Fisher et al.	2011-05-04	Antsiranana	Madagascar	225 m	-14.104	50.0357	Malagasy	CASC, San Francisco, CA, USA	CASC
CASENT0212409	BLF27090	Pheidole	spinosa	Pheidole.megacephala_MG151	2w.	pin	B.L.Fisher et al.	2011-05-04	Antsiranana	Madagascar	225 m	-14.104	50.0357	Malagasy	CASC, San Francisco, CA, USA	CASC
CASENT0212413	BLF27056	Pheidole	spinosa	Pheidole.megacephala_MG151	2w.	pin	B.L.Fisher et al.	2011-05-04	Antsiranana	Madagascar	225 m	-14.104	50.0357	Malagasy	CASC, San Francisco, CA, USA	CASC
CASENT0212501	BLF27157	Pheidole	spinosa	Pheidole.megacephala_MG151	2w.	pin	B.L.Fisher et al.	2011-05-05	Antsiranana	Madagascar	390 m	-14.1029	50.0198	Malagasy	CASC, San Francisco, CA, USA	CASC
CASENT0217990	BLF16171	Pheidole	spinosa	Pheidole.megacephala	1w.	pin	B.L.Fisher et al.	2006-12-12	Fianarantsoa	Madagascar	735 m	-22.4032	46.1292	Malagasy	CASC, San Francisco, CA, USA	CASC
CASENT0217997	BLF20183	Pheidole	spinosa	Pheidole.MG152	1w., 1s.	pin	B.L.Fisher et al.	2008-04-11	Antsiranana	Madagascar	22 m	-13.7073	48.4322	Malagasy	CASC, San Francisco, CA, USA	CASC
CASENT0217998	BLF12241	Pheidole	spinosa	Pheidole.MG157	1w., 1s.	pin	B.L.Fisher et al.	2005-06-03	Fianarantsoa	Madagascar	1075 m	-21.5117	47.41	Malagasy	CASC, San Francisco, CA, USA	CASC
CASENT0217999	BLF16289	Pheidole	spinosa	Pheidole.MG147	1w., 1s.	pin	B.L.Fisher et al.	2007-01-30	Antananarivo	Madagascar	1580 m	-19.387	47.4285	Malagasy	CASC, San Francisco, CA, USA	CASC
CASENT0230586	BLF27145	Pheidole	spinosa	Pheidole.megacephala_MG151	2w.	pin	B.L.Fisher et al.	2011-05-05	Antsiranana	Madagascar	390 m	-14.1029	50.0198	Malagasy	CASC, San Francisco, CA, USA	CASC
CASENT0231237	BLF26576	Pheidole	spinosa	Pheidole.megacephala_MG151	1w.	pin	B.L.Fisher et al.	2011-04-28	Antsiranana	Madagascar	415 m	-14.1707	49.9541	Malagasy	CASC, San Francisco, CA, USA	CASC
CASENT0235115	BLF01482	Pheidole	spinosa	Pheidole.MG158	1s.	pin	B.L.Fisher	1997-04-25	Toliara	Madagascar	170 m	-22.6833	44.5833	Malagasy	CASC, San Francisco, CA, USA	CASC
CASENT0235116	BLF01482	Pheidole	spinosa	Pheidole.MG158	1w., 1s., 1q.	pin	B.L.Fisher	1997-04-25	Toliara	Madagascar	170 m	-22.6833	44.5833	Malagasy	CASC, San Francisco, CA, USA	CASC
CASENT0235117	BLF21486	Pheidole	spinosa	Pheidole.MG145	1w.	pin	B.L.Fisher et al.	2009-02-08	Toliara	Madagascar	1365 m	-23.4185	46.4583	Malagasy	CASC, San Francisco, CA, USA	CASC
CASENT0235118	BLF22158	Pheidole	spinosa	Pheidole.MG155	1w., 1s.	pin	B.L.Fisher et al.	2009-02-19	Toamasina	Madagascar	860 m	-17.743	48.7294	Malagasy	CASC, San Francisco, CA, USA	CASC
CASENT0235140	BLF11109	Pheidole	spinosa	Pheidole.MGs128	1w.	pin	B.L.Fisher	2004-11-30	Antsiranana	Madagascar	10 m	-13.7153	50.1017	Malagasy	CASC, San Francisco, CA, USA	CASC
CASENT0235141	BLF10051	Pheidole	spinosa	Pheidole.MGs123	1w., 2s.	pin	B.L.Fisher	2003-12-11	Antsiranana	Madagascar	175 m	-12.97	49.7	Malagasy	CASC, San Francisco, CA, USA	CASC
CASENT0235193	BLF09569	Pheidole	spinosa	Pheidole.megacephala	1w.	pin	B.L.Fisher	2003-12-01	Antsiranana	Madagascar	375 m	-13.255	49.6167	Malagasy	CASC, San Francisco, CA, USA	CASC
CASENT0235194	BLF20048	Pheidole	spinosa	Pheidole.MG146	1w., 1s.	pin	B.L.Fisher et al.	2008-04-10	Mahajanga	Madagascar	21 m	-14.8439	48.0142	Malagasy	CASC, San Francisco, CA, USA	CASC
CASENT0235195	BLF17524	Pheidole	spinosa	Pheidole.MG146	1w.	pin	B.L.Fisher et al.	2007-05-08	Antananarivo	Madagascar	1403 m	-19.0128	47.4067	Malagasy	CASC, San Francisco, CA, USA	CASC
CASENT0236203	BLF26606	Pheidole	spinosa	Pheidole.megacephala_MG151	2w.	pin	B.L.Fisher et al.	2011-04-29	Antsiranana	Madagascar	415 m	-14.1707	49.9541	Malagasy	CASC, San Francisco, CA, USA	CASC
CASENT0242068	BLF26740	Pheidole	spinosa	Pheidole.megacephala_MG151	1w.	pin	B.L.Fisher et al.	2011-04-30	Antsiranana	Madagascar	900 m	-14.1651	49.9477	Malagasy	CASC, San Francisco, CA, USA	CASC
CASENT0243504	BLF26520	Pheidole	spinosa	Pheidole.megacephala_MG151	1w.	pin	B.L.Fisher et al.	2011-04-28	Antsiranana	Madagascar	415 m	-14.1707	49.9541	Malagasy	CASC, San Francisco, CA, USA	CASC
CASENT0245059	BLF26294	Pheidole	spinosa	Pheidole.ankalalahana01	2w.	pin	B.L.Fisher et al.	2011-03-26	Antananarivo	Madagascar	1350 m	-19.0071	47.1337	Malagasy	CASC, San Francisco, CA, USA	CASC
CASENT0245070	BLF26345	Pheidole	spinosa	Pheidole.ankalalahana01	2w.	pin	B.L.Fisher et al.	2011-03-26	Antananarivo	Madagascar	1350 m	-19.0071	47.1337	Malagasy	CASC, San Francisco, CA, USA	CASC
CASENT0245096	BLF26325	Pheidole	spinosa	Pheidole.ankalalahana02	2w.	pin	B.L.Fisher et al.	2011-03-26	Antananarivo	Madagascar	1350 m	-19.0071	47.1337	Malagasy	CASC, San Francisco, CA, USA	CASC
CASENT0245109	BLF26326	Pheidole	spinosa	Pheidole.ankalalahana01	2w.	pin	B.L.Fisher et al.	2011-03-26	Antananarivo	Madagascar	1350 m	-19.0071	47.1337	Malagasy	CASC, San Francisco, CA, USA	CASC
CASENT0245122	BLF26292	Pheidole	spinosa	Pheidole.ankalalahana02	2w.	pin	B.L.Fisher et al.	2011-03-26	Antananarivo	Madagascar	1350 m	-19.0071	47.1337	Malagasy	CASC, San Francisco, CA, USA	CASC
CASENT0245124	BLF26339	Pheidole	spinosa	Pheidole.ankalalahana01	2w.	pin	B.L.Fisher et al.	2011-03-26	Antananarivo	Madagascar	1350 m	-19.0071	47.1337	Malagasy	CASC, San Francisco, CA, USA	CASC
CASENT0245180	BLF26367	Pheidole	spinosa	Pheidole.ankalalahana02	2w.	pin	B.L.Fisher et al.	2011-03-29	Antananarivo	Madagascar	1375 m	-19.0066	47.1122	Malagasy	CASC, San Francisco, CA, USA	CASC
CASENT0245327	BLF26350	Pheidole	spinosa	Pheidole.ankalalahana01	2w.	pin	B.L.Fisher et al.	2011-03-29	Antananarivo	Madagascar	1375 m	-19.0066	47.1122	Malagasy	CASC, San Francisco, CA, USA	CASC
CASENT0245329	BLF26350	Pheidole	spinosa	Pheidole.ankalalahana02	1w.	pin	B.L.Fisher et al.	2011-03-29	Antananarivo	Madagascar	1375 m	-19.0066	47.1122	Malagasy	CASC, San Francisco, CA, USA	CASC
CASENT0245338	BLF26350	Pheidole	spinosa	Pheidole.ankalalahana02	1w.	pin	B.L.Fisher et al.	2011-03-29	Antananarivo	Madagascar	1375 m	-19.0066	47.1122	Malagasy	CASC, San Francisco, CA, USA	CASC
CASENT0261076	BLF27330	Pheidole	spinosa	Pheidole.sakaramy04	2w.	pin	B.L.Fisher et al.	2011-05-13	Antsiranana	Madagascar	365 m	-12.4413	49.2272	Malagasy	CASC, San Francisco, CA, USA	CASC
CASENT0261324	BLF27238	Pheidole	spinosa	Pheidole.sakaramy04	2w.	pin	B.L.Fisher et al.	2011-05-12	Antsiranana	Madagascar	260 m	-12.4411	49.232	Malagasy	CASC, San Francisco, CA, USA	CASC
CASENT0275854	BLF28367	Pheidole	spinosa	Pheidole.mandraka02	2w.	pin	B.L.Fisher et al.	2012-03-11	Antananarivo	Madagascar	1360 m	-18.9019	47.9079	Malagasy	CASC, San Francisco, CA, USA	CASC
CASENT0275867	BLF28315	Pheidole	spinosa	Pheidole.mandraka02	2w.	pin	B.L.Fisher et al.	2012-03-11	Antananarivo	Madagascar	1360 m	-18.9019	47.9079	Malagasy	CASC, San Francisco, CA, USA	CASC
CASENT0353233	BLF32089	Pheidole	spinosa	Pheidole.MG157	1w., 1q.	pin	B.L.Fisher et al.	2013-10-15	Antsiranana	Madagascar	498 m	-13.64	48.6737	Malagasy	CASC, San Francisco, CA, USA	CASC
CASENT0370656	BLF32083	Pheidole	spinosa	Pheidole.MG157	1w.	pin	B.L.Fisher et al.	2013-10-15	Antsiranana	Madagascar	498 m	-13.64	48.6737	Malagasy	CASC, San Francisco, CA, USA	CASC
CASENT0403229	BLF03218	Pheidole	spinosa	Pheidole.MGs122	2s.	pin	Fisher, Griswold et al.	2001-02-22	Antsiranana	Madagascar	90 m	-12.2589	49.3747	Malagasy	CASC, San Francisco, CA, USA	CASC
CASENT0403231	BLF03218	Pheidole	spinosa	Pheidole.MGs123	1s.	pin	Fisher, Griswold et al.	2001-02-22	Antsiranana	Madagascar	90 m	-12.2589	49.3747	Malagasy	CASC, San Francisco, CA, USA	CASC
CASENT0403239	BLF03123	Pheidole	spinosa	Pheidole.MG151	1w.	pin	Fisher, Griswold et al.	2001-02-22	Antsiranana	Madagascar	180 m	-12.3228	49.3382	Malagasy	CASC, San Francisco, CA, USA	CASC
CASENT0403249	BLF03123	Pheidole	spinosa	Pheidole.MGs123	1s.	pin	Fisher, Griswold et al.	2001-02-22	Antsiranana	Madagascar	180 m	-12.3228	49.3382	Malagasy	CASC, San Francisco, CA, USA	CASC
CASENT0403250	BLF03123	Pheidole	spinosa	Pheidole.MGs128	1s.	pin	Fisher, Griswold et al.	2001-02-22	Antsiranana	Madagascar	180 m	-12.3228	49.3382	Malagasy	CASC, San Francisco, CA, USA	CASC
CASENT0403260	BLF03418	Pheidole	spinosa	Pheidole.MGs128	1s.	pin	Fisher, Griswold et al.	2001-03-19	Antsiranana	Madagascar	30 m	-13.4193	48.3312	Malagasy	CASC, San Francisco, CA, USA	CASC
CASENT0403261	BLF03418	Pheidole	spinosa	Pheidole.MGs130	1s.	pin	Fisher, Griswold et al.	2001-03-19	Antsiranana	Madagascar	30 m	-13.4193	48.3312	Malagasy	CASC, San Francisco, CA, USA	CASC
CASENT0403262	BLF03418	Pheidole	spinosa	Pheidole.MGs122	1s.	pin	Fisher, Griswold et al.	2001-03-19	Antsiranana	Madagascar	30 m	-13.4193	48.3312	Malagasy	CASC, San Francisco, CA, USA	CASC
CASENT0403265	BLF03418	Pheidole	spinosa	Pheidole.MG151	1w.	pin	Fisher, Griswold et al.	2001-03-19	Antsiranana	Madagascar	30 m	-13.4193	48.3312	Malagasy	CASC, San Francisco, CA, USA	CASC
CASENT0403303	BLF03172	Pheidole	spinosa	Pheidole.MGs128	3s.	pin	Fisher, Griswold et al.	2001-02-22	Antsiranana	Madagascar	180 m	-12.3228	49.3382	Malagasy	CASC, San Francisco, CA, USA	CASC
CASENT0406415	BLF02781	Pheidole	spinosa	Pheidole.MG151	1w.	pin	Fisher, Griswold et al.	2001-01-26	Antsiranana	Madagascar	325 m	-12.4689	49.2422	Malagasy	CASC, San Francisco, CA, USA	CASC
CASENT0406461	BLF03343	Pheidole	spinosa	Pheidole.MGs122	1s.	pin	Fisher, Griswold et al.	2001-03-11	Antsiranana	Madagascar	120 m	-14.3089	47.9143	Malagasy	CASC, San Francisco, CA, USA	CASC
CASENT0406463	BLF03343	Pheidole	spinosa	Pheidole.MGs123	1s.	pin	Fisher, Griswold et al.	2001-03-11	Antsiranana	Madagascar	120 m	-14.3089	47.9143	Malagasy	CASC, San Francisco, CA, USA	CASC
CASENT0406467	BLF03380	Pheidole	spinosa	Pheidole.MGs128	1s.	pin	Fisher, Griswold et al.	2001-03-11	Antsiranana	Madagascar	120 m	-14.3089	47.9143	Malagasy	CASC, San Francisco, CA, USA	CASC
CASENT0406469	BLF03412	Pheidole	spinosa	Pheidole.MG151	2w.	pin	Fisher, Griswold et al.	2001-03-11	Antsiranana	Madagascar	120 m	-14.3089	47.9143	Malagasy	CASC, San Francisco, CA, USA	CASC
CASENT0406471	BLF03412	Pheidole	spinosa	Pheidole.MGs128	1s.	pin	Fisher, Griswold et al.	2001-03-11	Antsiranana	Madagascar	120 m	-14.3089	47.9143	Malagasy	CASC, San Francisco, CA, USA	CASC
CASENT0406472	BLF03412	Pheidole	spinosa	Pheidole.MGs132	1s.	pin	Fisher, Griswold et al.	2001-03-11	Antsiranana	Madagascar	120 m	-14.3089	47.9143	Malagasy	CASC, San Francisco, CA, USA	CASC
CASENT0406526	BLF03335	Pheidole	spinosa	Pheidole.MG151	1w.	pin	Fisher, Griswold et al.	2001-03-11	Antsiranana	Madagascar	120 m	-14.3089	47.9143	Malagasy	CASC, San Francisco, CA, USA	CASC
CASENT0406543	BLF02859	Pheidole	spinosa	Pheidole.MG154	1w.	pin	Fisher, Griswold et al.	2001-02-10	Antsiranana	Madagascar	80 m	-12.9089	49.1098	Malagasy	CASC, San Francisco, CA, USA	CASC
CASENT0406562	BLF03202	Pheidole	spinosa	Pheidole.MG154	1w.	pin	Fisher, Griswold et al.	2001-02-22	Antsiranana	Madagascar	90 m	-12.2589	49.3747	Malagasy	CASC, San Francisco, CA, USA	CASC
CASENT0406578	BLF02655	Pheidole	spinosa	Pheidole.MGs128	1s.	pin	Fisher, Griswold et al.	2001-01-26	Antsiranana	Madagascar	325 m	-12.4689	49.2422	Malagasy	CASC, San Francisco, CA, USA	CASC
CASENT0406579	BLF02655	Pheidole	spinosa	Pheidole.MGs123	2s.	pin	Fisher, Griswold et al.	2001-01-26	Antsiranana	Madagascar	325 m	-12.4689	49.2422	Malagasy	CASC, San Francisco, CA, USA	CASC
CASENT0406580	BLF02655	Pheidole	spinosa	Pheidole.MGs128	2s.	pin	Fisher, Griswold et al.	2001-01-26	Antsiranana	Madagascar	325 m	-12.4689	49.2422	Malagasy	CASC, San Francisco, CA, USA	CASC
CASENT0406581	BLF02655	Pheidole	spinosa	Pheidole.MGs128	1s.	pin	Fisher, Griswold et al.	2001-01-26	Antsiranana	Madagascar	325 m	-12.4689	49.2422	Malagasy	CASC, San Francisco, CA, USA	CASC
CASENT0406591	BLF02655	Pheidole	spinosa	Pheidole.MG146	1w.	pin	Fisher, Griswold et al.	2001-01-26	Antsiranana	Madagascar	325 m	-12.4689	49.2422	Malagasy	CASC, San Francisco, CA, USA	CASC
CASENT0406604	BLF02655	Pheidole	spinosa	Pheidole.MG154	1w.	pin	Fisher, Griswold et al.	2001-01-26	Antsiranana	Madagascar	325 m	-12.4689	49.2422	Malagasy	CASC, San Francisco, CA, USA	CASC
CASENT0406618	BLF02655	Pheidole	spinosa	Pheidole.MG151	1w.	pin	Fisher, Griswold et al.	2001-01-26	Antsiranana	Madagascar	325 m	-12.4689	49.2422	Malagasy	CASC, San Francisco, CA, USA	CASC
CASENT0406639	BLF02862	Pheidole	spinosa	Pheidole.MGs123	2s.	pin	Fisher, Griswold et al.	2001-02-10	Antsiranana	Madagascar	80 m	-12.9089	49.1098	Malagasy	CASC, San Francisco, CA, USA	CASC
CASENT0406641	BLF02862	Pheidole	spinosa	Pheidole.MGs128	1s.	pin	Fisher, Griswold et al.	2001-02-10	Antsiranana	Madagascar	80 m	-12.9089	49.1098	Malagasy	CASC, San Francisco, CA, USA	CASC
CASENT0406654	BLF02701	Pheidole	spinosa	Pheidole.MG151	2w.	pin	Fisher, Griswold et al.	2001-01-26	Antsiranana	Madagascar	325 m	-12.4689	49.2422	Malagasy	CASC, San Francisco, CA, USA	CASC
CASENT0406656	BLF02701	Pheidole	spinosa	Pheidole.MGs128	1s.	pin	Fisher, Griswold et al.	2001-01-26	Antsiranana	Madagascar	325 m	-12.4689	49.2422	Malagasy	CASC, San Francisco, CA, USA	CASC
CASENT0406657	BLF02677	Pheidole	spinosa	Pheidole.MG151	1w.	pin	Fisher, Griswold et al.	2001-01-26	Antsiranana	Madagascar	325 m	-12.4689	49.2422	Malagasy	CASC, San Francisco, CA, USA	CASC
CASENT0406670	BLF02668	Pheidole	spinosa	Pheidole.MGs128	2s.	pin	Fisher, Griswold et al.	2001-01-26	Antsiranana	Madagascar	325 m	-12.4689	49.2422	Malagasy	CASC, San Francisco, CA, USA	CASC
CASENT0406675	BLF02672	Pheidole	spinosa	Pheidole.MGs128	1s.	pin	Fisher, Griswold et al.	2001-01-26	Antsiranana	Madagascar	325 m	-12.4689	49.2422	Malagasy	CASC, San Francisco, CA, USA	CASC
CASENT0406676	BLF02672	Pheidole	spinosa	Pheidole.MGs128	1s.	pin	Fisher, Griswold et al.	2001-01-26	Antsiranana	Madagascar	325 m	-12.4689	49.2422	Malagasy	CASC, San Francisco, CA, USA	CASC
CASENT0406678	BLF02672	Pheidole	spinosa	Pheidole.MG151	1w.	pin	Fisher, Griswold et al.	2001-01-26	Antsiranana	Madagascar	325 m	-12.4689	49.2422	Malagasy	CASC, San Francisco, CA, USA	CASC
CASENT0406683	BLF02672	Pheidole	spinosa	Pheidole.MG154	1s.	pin	Fisher, Griswold et al.	2001-01-26	Antsiranana	Madagascar	325 m	-12.4689	49.2422	Malagasy	CASC, San Francisco, CA, USA	CASC
CASENT0406687	BLF02862	Pheidole	spinosa	Pheidole.MG151	3w.	pin	Fisher, Griswold et al.	2001-02-10	Antsiranana	Madagascar	80 m	-12.9089	49.1098	Malagasy	CASC, San Francisco, CA, USA	CASC
CASENT0406694	BLF02674	Pheidole	spinosa	Pheidole.MG151	1w.	pin	Fisher, Griswold et al.	2001-01-26	Antsiranana	Madagascar	325 m	-12.4689	49.2422	Malagasy	CASC, San Francisco, CA, USA	CASC
CASENT0406699	BLF03250	Pheidole	spinosa	Pheidole.MG154	1w.	pin	Fisher, Griswold et al.	2001-03-04	Antsiranana	Madagascar	600 m	-13.7986	48.1617	Malagasy	CASC, San Francisco, CA, USA	CASC
CASENT0406706	BLF03016	Pheidole	spinosa	Pheidole.MG151	1w.	pin	Fisher, Griswold et al.	2001-02-16	Antsiranana	Madagascar	210 m	-12.8636	49.2258	Malagasy	CASC, San Francisco, CA, USA	CASC
CASENT0406707	BLF03016	Pheidole	spinosa	Pheidole.MG150	1w.	pin	Fisher, Griswold et al.	2001-02-16	Antsiranana	Madagascar	210 m	-12.8636	49.2258	Malagasy	CASC, San Francisco, CA, USA	CASC
CASENT0406710	BLF03016	Pheidole	spinosa	Pheidole.MGs122	1s.	pin	Fisher, Griswold et al.	2001-02-16	Antsiranana	Madagascar	210 m	-12.8636	49.2258	Malagasy	CASC, San Francisco, CA, USA	CASC
CASENT0406711	BLF03016	Pheidole	spinosa	Pheidole.MGs128	1s.	pin	Fisher, Griswold et al.	2001-02-16	Antsiranana	Madagascar	210 m	-12.8636	49.2258	Malagasy	CASC, San Francisco, CA, USA	CASC
CASENT0418196	BLF04706	Pheidole	spinosa	Pheidole.MG150	1w.	pin	B.L.Fisher, H.J.Ratsirarson	2001-11-28	Toamasina	Madagascar	200 m	-15.71	49.97	Malagasy	CASC, San Francisco, CA, USA	CASC
CASENT0418210	BLF04715	Pheidole	spinosa	Pheidole.MG150	1s.	pin	B.L.Fisher, H.J.Ratsirarson	2001-11-28	Toamasina	Madagascar	200 m	-15.71	49.97	Malagasy	CASC, San Francisco, CA, USA	CASC
CASENT0418213	BLF04705	Pheidole	spinosa	Pheidole.MG150	1w.	pin	B.L.Fisher, H.J.Ratsirarson	2001-11-28	Toamasina	Madagascar	200 m	-15.71	49.97	Malagasy	CASC, San Francisco, CA, USA	CASC
CASENT0418226	BLF04718	Pheidole	spinosa	Pheidole.MG150	1w.	pin	B.L.Fisher, H.J.Ratsirarson	2001-11-28	Toamasina	Madagascar	200 m	-15.71	49.97	Malagasy	CASC, San Francisco, CA, USA	CASC
CASENT0418245	BLF04687	Pheidole	spinosa	Pheidole.MG150	1w.	pin	B.L.Fisher, H.J.Ratsirarson	2001-11-28	Toamasina	Madagascar	150 m	-15.7133	49.9717	Malagasy	CASC, San Francisco, CA, USA	CASC
CASENT0418263	BLF04713	Pheidole	spinosa	Pheidole.MG150	1s.	pin	B.L.Fisher, H.J.Ratsirarson	2001-11-28	Toamasina	Madagascar	200 m	-15.71	49.97	Malagasy	CASC, San Francisco, CA, USA	CASC
CASENT0418266	BLF04713	Pheidole	spinosa	Pheidole.MGs129	1s.	pin	B.L.Fisher, H.J.Ratsirarson	2001-11-28	Toamasina	Madagascar	200 m	-15.71	49.97	Malagasy	CASC, San Francisco, CA, USA	CASC
CASENT0418281	BLF04709	Pheidole	spinosa	Pheidole.MG150	1w.	pin	B.L.Fisher, H.J.Ratsirarson	2001-11-28	Toamasina	Madagascar	200 m	-15.71	49.97	Malagasy	CASC, San Francisco, CA, USA	CASC
CASENT0418283	BLF04709	Pheidole	spinosa	Pheidole.MGs130	1s.	pin	B.L.Fisher, H.J.Ratsirarson	2001-11-28	Toamasina	Madagascar	200 m	-15.71	49.97	Malagasy	CASC, San Francisco, CA, USA	CASC
CASENT0418507	BLF04604	Pheidole	spinosa	Pheidole.MG150	1w.	pin	Fisher-Griswold Arthropod Team	2001-11-28	Toliara	Madagascar	100 m	-20.045	44.6622	Malagasy	CASC, San Francisco, CA, USA	CASC
CASENT0418510	BLF04604	Pheidole	spinosa	Pheidole.MG155	1w.	pin	Fisher-Griswold Arthropod Team	2001-11-28	Toliara	Madagascar	100 m	-20.045	44.6622	Malagasy	CASC, San Francisco, CA, USA	CASC
CASENT0418567	BLF04510	Pheidole	spinosa	Pheidole.MGs123	3s.	pin	Fisher-Griswold Arthropod Team	2001-11-21	Mahajanga	Madagascar	20 m	-19.0214	44.4407	Malagasy	CASC, San Francisco, CA, USA	CASC
CASENT0418583	BLF04510	Pheidole	spinosa	Pheidole.MG148	1w.	pin	Fisher-Griswold Arthropod Team	2001-11-21	Mahajanga	Madagascar	20 m	-19.0214	44.4407	Malagasy	CASC, San Francisco, CA, USA	CASC
CASENT0418607	BLF05760	Pheidole	spinosa	Pheidole.MG154	1w.	pin	Fisher-Griswold Arthropod Team	2002-02-21	Toliara	Madagascar	80 m	-24.6536	43.9967	Malagasy	CASC, San Francisco, CA, USA	CASC
CASENT0418642	BLF05760	Pheidole	spinosa	Pheidole.MG155	3w.	pin	Fisher-Griswold Arthropod Team	2002-02-21	Toliara	Madagascar	80 m	-24.6536	43.9967	Malagasy	CASC, San Francisco, CA, USA	CASC
CASENT0418644	BLF05760	Pheidole	spinosa	Pheidole.MG154	1w.	pin	Fisher-Griswold Arthropod Team	2002-02-21	Toliara	Madagascar	80 m	-24.6536	43.9967	Malagasy	CASC, San Francisco, CA, USA	CASC
CASENT0418672	BLF05760	Pheidole	spinosa	Pheidole.MG150	1w.	pin	Fisher-Griswold Arthropod Team	2002-02-21	Toliara	Madagascar	80 m	-24.6536	43.9967	Malagasy	CASC, San Francisco, CA, USA	CASC
CASENT0418673	BLF05760	Pheidole	spinosa	Pheidole.MG148	1w.	pin	Fisher-Griswold Arthropod Team	2002-02-21	Toliara	Madagascar	80 m	-24.6536	43.9967	Malagasy	CASC, San Francisco, CA, USA	CASC
CASENT0418766	BLF04510	Pheidole	spinosa	Pheidole.MGs128	1s.	pin	Fisher-Griswold Arthropod Team	2001-11-21	Mahajanga	Madagascar	20 m	-19.0214	44.4407	Malagasy	CASC, San Francisco, CA, USA	CASC
CASENT0418826	BLF04510	Pheidole	spinosa	Pheidole.MGs122	2s.	pin	Fisher-Griswold Arthropod Team	2001-11-21	Mahajanga	Madagascar	20 m	-19.0214	44.4407	Malagasy	CASC, San Francisco, CA, USA	CASC
CASENT0418830	BLF04510	Pheidole	spinosa	Pheidole.MG150	1w.	pin	Fisher-Griswold Arthropod Team	2001-11-21	Mahajanga	Madagascar	20 m	-19.0214	44.4407	Malagasy	CASC, San Francisco, CA, USA	CASC
CASENT0418831	BLF04510	Pheidole	spinosa	Pheidole.MG147	1w.	pin	Fisher-Griswold Arthropod Team	2001-11-21	Mahajanga	Madagascar	20 m	-19.0214	44.4407	Malagasy	CASC, San Francisco, CA, USA	CASC
CASENT0418871	BLF04510	Pheidole	spinosa	Pheidole.MG147	1w.	pin	Fisher-Griswold Arthropod Team	2001-11-21	Mahajanga	Madagascar	20 m	-19.0214	44.4407	Malagasy	CASC, San Francisco, CA, USA	CASC
CASENT0419035	BLF03666	Pheidole	spinosa	Pheidole.MG145	1w.	pin	Fisher, Griswold et al.	2001-04-09	Mahajanga	Madagascar	210 m	-16.2672	47.0486	Malagasy	CASC, San Francisco, CA, USA	CASC
CASENT0419074	BLF03666	Pheidole	spinosa	Pheidole.MG151	1w.	pin	Fisher, Griswold et al.	2001-04-09	Mahajanga	Madagascar	210 m	-16.2672	47.0486	Malagasy	CASC, San Francisco, CA, USA	CASC
CASENT0419134	BLF03666	Pheidole	spinosa	Pheidole.MG150	1w.	pin	Fisher, Griswold et al.	2001-04-09	Mahajanga	Madagascar	210 m	-16.2672	47.0486	Malagasy	CASC, San Francisco, CA, USA	CASC
CASENT0419199	BLF03601	Pheidole	spinosa	Pheidole.MG146	1w.	pin	Fisher, Griswold et al.	2001-04-02	Mahajanga	Madagascar	135 m	-16.2281	47.1436	Malagasy	CASC, San Francisco, CA, USA	CASC
CASENT0419346	BLF03601	Pheidole	spinosa	Pheidole.MG154	3w.	pin	Fisher, Griswold et al.	2001-04-02	Mahajanga	Madagascar	135 m	-16.2281	47.1436	Malagasy	CASC, San Francisco, CA, USA	CASC
CASENT0419381	BLF03601	Pheidole	spinosa	Pheidole.MG151	1w.	pin	Fisher, Griswold et al.	2001-04-02	Mahajanga	Madagascar	135 m	-16.2281	47.1436	Malagasy	CASC, San Francisco, CA, USA	CASC
CASENT0419508	BLF03524	Pheidole	spinosa	Pheidole.MG154	1w.	pin	Fisher, Griswold et al.	2001-03-26	Mahajanga	Madagascar	130 m	-16.3208	46.8107	Malagasy	CASC, San Francisco, CA, USA	CASC
CASENT0419523	BLF03524	Pheidole	spinosa	Pheidole.MG148	1w.	pin	Fisher, Griswold et al.	2001-03-26	Mahajanga	Madagascar	130 m	-16.3208	46.8107	Malagasy	CASC, San Francisco, CA, USA	CASC
CASENT0419578	BLF03524	Pheidole	spinosa	Pheidole.MGs132	1s.	pin	Fisher, Griswold et al.	2001-03-26	Mahajanga	Madagascar	130 m	-16.3208	46.8107	Malagasy	CASC, San Francisco, CA, USA	CASC
CASENT0419580	BLF03524	Pheidole	spinosa	Pheidole.MGs128	1s.	pin	Fisher, Griswold et al.	2001-03-26	Mahajanga	Madagascar	130 m	-16.3208	46.8107	Malagasy	CASC, San Francisco, CA, USA	CASC
CASENT0419814	BLF04434	Pheidole	spinosa	Pheidole.MG150	3w.	pin	Fisher-Griswold Arthropod Team	2001-11-16	Mahajanga	Madagascar	150 m	-18.7094	44.7182	Malagasy	CASC, San Francisco, CA, USA	CASC
CASENT0419818	BLF04434	Pheidole	spinosa	Pheidole.MG151	1w.	pin	Fisher-Griswold Arthropod Team	2001-11-16	Mahajanga	Madagascar	150 m	-18.7094	44.7182	Malagasy	CASC, San Francisco, CA, USA	CASC
CASENT0419915	BLF04434	Pheidole	spinosa	Pheidole.MG154	1w.	pin	Fisher-Griswold Arthropod Team	2001-11-16	Mahajanga	Madagascar	150 m	-18.7094	44.7182	Malagasy	CASC, San Francisco, CA, USA	CASC
CASENT0419966	BLF06318	Pheidole	spinosa	Pheidole.MG154	1w.	pin	Fisher-Griswold Arthropod Team	2002-03-22	Toliara	Madagascar	90 m	-23.9922	43.8807	Malagasy	CASC, San Francisco, CA, USA	CASC
CASENT0419982	BLF05318	Pheidole	spinosa	Pheidole.MG154	1w.	pin	Fisher-Griswold Arthropod Team	2002-02-03	Toliara	Madagascar	35 m	-24.9569	46.2715	Malagasy	CASC, San Francisco, CA, USA	CASC
CASENT0420005	BLF03218	Pheidole	spinosa	Pheidole.MG154	3w.	pin	Fisher, Griswold et al.	2001-02-22	Antsiranana	Madagascar	90 m	-12.2589	49.3747	Malagasy	CASC, San Francisco, CA, USA	CASC
CASENT0420103	BLF03200	Pheidole	spinosa	Pheidole.MG154	1w.	pin	Fisher, Griswold et al.	2001-02-22	Antsiranana	Madagascar	90 m	-12.2589	49.3747	Malagasy	CASC, San Francisco, CA, USA	CASC
CASENT0420105	BLF03200	Pheidole	spinosa	Pheidole.MG145	1w.	pin	Fisher, Griswold et al.	2001-02-22	Antsiranana	Madagascar	90 m	-12.2589	49.3747	Malagasy	CASC, San Francisco, CA, USA	CASC
CASENT0420116	BLF03200	Pheidole	spinosa	Pheidole.MGs123	1s.	pin	Fisher, Griswold et al.	2001-02-22	Antsiranana	Madagascar	90 m	-12.2589	49.3747	Malagasy	CASC, San Francisco, CA, USA	CASC
CASENT0420131	BLF03200	Pheidole	spinosa	Pheidole.MG146	1w.	pin	Fisher, Griswold et al.	2001-02-22	Antsiranana	Madagascar	90 m	-12.2589	49.3747	Malagasy	CASC, San Francisco, CA, USA	CASC
CASENT0420170	BLF03010	Pheidole	spinosa	Pheidole.MGs122	3s.	pin	Fisher, Griswold et al.	2001-02-16	Antsiranana	Madagascar	210 m	-12.8636	49.2258	Malagasy	CASC, San Francisco, CA, USA	CASC
CASENT0420171	BLF03010	Pheidole	spinosa	Pheidole.MGs128	3s.	pin	Fisher, Griswold et al.	2001-02-16	Antsiranana	Madagascar	210 m	-12.8636	49.2258	Malagasy	CASC, San Francisco, CA, USA	CASC
CASENT0420175	BLF03010	Pheidole	spinosa	Pheidole.MG151	1w.	pin	Fisher, Griswold et al.	2001-02-16	Antsiranana	Madagascar	210 m	-12.8636	49.2258	Malagasy	CASC, San Francisco, CA, USA	CASC
CASENT0420180	BLF03200	Pheidole	spinosa	Pheidole.MGs128	1s.	pin	Fisher, Griswold et al.	2001-02-22	Antsiranana	Madagascar	90 m	-12.2589	49.3747	Malagasy	CASC, San Francisco, CA, USA	CASC
CASENT0420184	BLF03127	Pheidole	spinosa	Pheidole.MGs128	1s.	pin	Fisher, Griswold et al.	2001-02-22	Antsiranana	Madagascar	90 m	-12.2589	49.3747	Malagasy	CASC, San Francisco, CA, USA	CASC
CASENT0420185	BLF03127	Pheidole	spinosa	Pheidole.MGs122	3s.	pin	Fisher, Griswold et al.	2001-02-22	Antsiranana	Madagascar	90 m	-12.2589	49.3747	Malagasy	CASC, San Francisco, CA, USA	CASC
CASENT0420192	BLF03127	Pheidole	spinosa	Pheidole.MG154	1w.	pin	Fisher, Griswold et al.	2001-02-22	Antsiranana	Madagascar	90 m	-12.2589	49.3747	Malagasy	CASC, San Francisco, CA, USA	CASC
CASENT0420193	BLF03127	Pheidole	spinosa	Pheidole.MG155	1w.	pin	Fisher, Griswold et al.	2001-02-22	Antsiranana	Madagascar	90 m	-12.2589	49.3747	Malagasy	CASC, San Francisco, CA, USA	CASC
CASENT0420195	BLF03127	Pheidole	spinosa	Pheidole.MG151	1w.	pin	Fisher, Griswold et al.	2001-02-22	Antsiranana	Madagascar	90 m	-12.2589	49.3747	Malagasy	CASC, San Francisco, CA, USA	CASC
CASENT0420198	BLF03127	Pheidole	spinosa	Pheidole.MG154	1w.	pin	Fisher, Griswold et al.	2001-02-22	Antsiranana	Madagascar	90 m	-12.2589	49.3747	Malagasy	CASC, San Francisco, CA, USA	CASC
CASENT0420202	BLF03127	Pheidole	spinosa	Pheidole.MG150	1w.	pin	Fisher, Griswold et al.	2001-02-22	Antsiranana	Madagascar	90 m	-12.2589	49.3747	Malagasy	CASC, San Francisco, CA, USA	CASC
CASENT0420206	BLF02854	Pheidole	spinosa	Pheidole.MGs128	1s.	pin	Fisher, Griswold et al.	2001-02-10	Antsiranana	Madagascar	80 m	-12.9089	49.1098	Malagasy	CASC, San Francisco, CA, USA	CASC
CASENT0420288	BLF03250	Pheidole	spinosa	Pheidole.MG151	1w.	pin	Fisher, Griswold et al.	2001-03-04	Antsiranana	Madagascar	600 m	-13.7986	48.1617	Malagasy	CASC, San Francisco, CA, USA	CASC
CASENT0420649	BLF03200	Pheidole	spinosa	Pheidole.MG151	1w.	pin	Fisher, Griswold et al.	2001-02-22	Antsiranana	Madagascar	90 m	-12.2589	49.3747	Malagasy	CASC, San Francisco, CA, USA	CASC
CASENT0421071	BLF03202	Pheidole	spinosa	Pheidole.MGs128	1s.	pin	Fisher, Griswold et al.	2001-02-22	Antsiranana	Madagascar	90 m	-12.2589	49.3747	Malagasy	CASC, San Francisco, CA, USA	CASC
CASENT0421077	BLF03202	Pheidole	spinosa	Pheidole.MG148	1w.	pin	Fisher, Griswold et al.	2001-02-22	Antsiranana	Madagascar	90 m	-12.2589	49.3747	Malagasy	CASC, San Francisco, CA, USA	CASC
CASENT0421079	BLF03202	Pheidole	spinosa	Pheidole.MG151	2w.	pin	Fisher, Griswold et al.	2001-02-22	Antsiranana	Madagascar	90 m	-12.2589	49.3747	Malagasy	CASC, San Francisco, CA, USA	CASC
CASENT0421098	BLF03202	Pheidole	spinosa	Pheidole.MGs122	1s.	pin	Fisher, Griswold et al.	2001-02-22	Antsiranana	Madagascar	90 m	-12.2589	49.3747	Malagasy	CASC, San Francisco, CA, USA	CASC
CASENT0421120	BLF02660	Pheidole	spinosa	Pheidole.MG151	1w.	pin	Fisher, Griswold et al.	2001-01-26	Antsiranana	Madagascar	325 m	-12.4689	49.2422	Malagasy	CASC, San Francisco, CA, USA	CASC
CASENT0421126	BLF02660	Pheidole	spinosa	Pheidole.MGs128	1s.	pin	Fisher, Griswold et al.	2001-01-26	Antsiranana	Madagascar	325 m	-12.4689	49.2422	Malagasy	CASC, San Francisco, CA, USA	CASC
CASENT0421131	BLF02660	Pheidole	spinosa	Pheidole.MGs128	1s.	pin	Fisher, Griswold et al.	2001-01-26	Antsiranana	Madagascar	325 m	-12.4689	49.2422	Malagasy	CASC, San Francisco, CA, USA	CASC
CASENT0421135	BLF02660	Pheidole	spinosa	Pheidole.MGs122	3s.	pin	Fisher, Griswold et al.	2001-01-26	Antsiranana	Madagascar	325 m	-12.4689	49.2422	Malagasy	CASC, San Francisco, CA, USA	CASC
CASENT0421159	BLF03132	Pheidole	spinosa	Pheidole.MGs128	1s.	pin	Fisher, Griswold et al.	2001-02-22	Antsiranana	Madagascar	180 m	-12.3228	49.3382	Malagasy	CASC, San Francisco, CA, USA	CASC
CASENT0421170	BLF03132	Pheidole	spinosa	Pheidole.MG151	1w.	pin	Fisher, Griswold et al.	2001-02-22	Antsiranana	Madagascar	180 m	-12.3228	49.3382	Malagasy	CASC, San Francisco, CA, USA	CASC
CASENT0421186	BLF03132	Pheidole	spinosa	Pheidole.MG150	1w.	pin	Fisher, Griswold et al.	2001-02-22	Antsiranana	Madagascar	180 m	-12.3228	49.3382	Malagasy	CASC, San Francisco, CA, USA	CASC
CASENT0421191	BLF03132	Pheidole	spinosa	Pheidole.MG146	1w.	pin	Fisher, Griswold et al.	2001-02-22	Antsiranana	Madagascar	180 m	-12.3228	49.3382	Malagasy	CASC, San Francisco, CA, USA	CASC
CASENT0421203	BLF03426	Pheidole	spinosa	Pheidole.MGs128	2s.	pin	Fisher, Griswold et al.	2001-03-19	Antsiranana	Madagascar	30 m	-13.4193	48.3312	Malagasy	CASC, San Francisco, CA, USA	CASC
CASENT0421210	BLF03426	Pheidole	spinosa	Pheidole.MG154	1w.	pin	Fisher, Griswold et al.	2001-03-19	Antsiranana	Madagascar	30 m	-13.4193	48.3312	Malagasy	CASC, San Francisco, CA, USA	CASC
CASENT0421810	BLF02654	Pheidole	spinosa	Pheidole.MG151	1w.	pin	Fisher, Griswold et al.	2001-01-26	Antsiranana	Madagascar	325 m	-12.4689	49.2422	Malagasy	CASC, San Francisco, CA, USA	CASC
CASENT0421826	BLF03340	Pheidole	spinosa	Pheidole.MG151	1w.	pin	Fisher, Griswold et al.	2001-03-11	Antsiranana	Madagascar	120 m	-14.3089	47.9143	Malagasy	CASC, San Francisco, CA, USA	CASC
CASENT0423066	BLF02660	Pheidole	spinosa	Pheidole.MG145	1w.	pin	Fisher, Griswold et al.	2001-01-26	Antsiranana	Madagascar	325 m	-12.4689	49.2422	Malagasy	CASC, San Francisco, CA, USA	CASC
CASENT0423797	BLF02684	Pheidole	spinosa	Pheidole.MG151	1w.	pin	Fisher, Griswold et al.	2001-01-26	Antsiranana	Madagascar	325 m	-12.4689	49.2422	Malagasy	CASC, San Francisco, CA, USA	CASC
CASENT0423798	BLF02654	Pheidole	spinosa	Pheidole.MG151	1w.	pin	Fisher, Griswold et al.	2001-01-26	Antsiranana	Madagascar	325 m	-12.4689	49.2422	Malagasy	CASC, San Francisco, CA, USA	CASC
CASENT0423804	BLF02654	Pheidole	spinosa	Pheidole.MGs122	1s.	pin	Fisher, Griswold et al.	2001-01-26	Antsiranana	Madagascar	325 m	-12.4689	49.2422	Malagasy	CASC, San Francisco, CA, USA	CASC
CASENT0423805	BLF02654	Pheidole	spinosa	Pheidole.MGs122	1s.	pin	Fisher, Griswold et al.	2001-01-26	Antsiranana	Madagascar	325 m	-12.4689	49.2422	Malagasy	CASC, San Francisco, CA, USA	CASC
CASENT0423806	BLF02654	Pheidole	spinosa	Pheidole.MG151	1w.	pin	Fisher, Griswold et al.	2001-01-26	Antsiranana	Madagascar	325 m	-12.4689	49.2422	Malagasy	CASC, San Francisco, CA, USA	CASC
CASENT0423979	BLF02654	Pheidole	spinosa	Pheidole.MG154	1w.	pin	Fisher, Griswold et al.	2001-01-26	Antsiranana	Madagascar	325 m	-12.4689	49.2422	Malagasy	CASC, San Francisco, CA, USA	CASC
CASENT0424373	BLF03576	Pheidole	spinosa	Pheidole.MGs128	1s.	pin	Fisher, Griswold et al.	2001-03-26	Mahajanga	Madagascar	70 m	-16.2989	46.813	Malagasy	CASC, San Francisco, CA, USA	CASC
CASENT0424393	BLF03576	Pheidole	spinosa	Pheidole.MG151	2w.	pin	Fisher, Griswold et al.	2001-03-26	Mahajanga	Madagascar	70 m	-16.2989	46.813	Malagasy	CASC, San Francisco, CA, USA	CASC
CASENT0424566	BLF04288	Pheidole	spinosa	Pheidole.MG148	1w.	pin	Fisher-Griswold Arthropod Team	2001-11-06	Mahajanga	Madagascar	50 m	-19.1419	44.828	Malagasy	CASC, San Francisco, CA, USA	CASC
CASENT0424568	BLF04288	Pheidole	spinosa	Pheidole.MGs128	1s.	pin	Fisher-Griswold Arthropod Team	2001-11-06	Mahajanga	Madagascar	50 m	-19.1419	44.828	Malagasy	CASC, San Francisco, CA, USA	CASC
CASENT0424608	BLF04239	Pheidole	spinosa	Pheidole.MG150	3w.	pin	Fisher-Griswold Arthropod Team	2001-11-06	Mahajanga	Madagascar	50 m	-19.1419	44.828	Malagasy	CASC, San Francisco, CA, USA	CASC
CASENT0424612	BLF04239	Pheidole	spinosa	Pheidole.MGs123	1s.	pin	Fisher-Griswold Arthropod Team	2001-11-06	Mahajanga	Madagascar	50 m	-19.1419	44.828	Malagasy	CASC, San Francisco, CA, USA	CASC
CASENT0424613	BLF04239	Pheidole	spinosa	Pheidole.MGs122	1s.	pin	Fisher-Griswold Arthropod Team	2001-11-06	Mahajanga	Madagascar	50 m	-19.1419	44.828	Malagasy	CASC, San Francisco, CA, USA	CASC
CASENT0424615	BLF04239	Pheidole	spinosa	Pheidole.MGs123	1s.	pin	Fisher-Griswold Arthropod Team	2001-11-06	Mahajanga	Madagascar	50 m	-19.1419	44.828	Malagasy	CASC, San Francisco, CA, USA	CASC
CASENT0424617	BLF04239	Pheidole	spinosa	Pheidole.MG148	1w.	pin	Fisher-Griswold Arthropod Team	2001-11-06	Mahajanga	Madagascar	50 m	-19.1419	44.828	Malagasy	CASC, San Francisco, CA, USA	CASC
CASENT0424644	BLF04314	Pheidole	spinosa	Pheidole.MG150	3w.	pin	Fisher-Griswold Arthropod Team	2001-11-06	Mahajanga	Madagascar	50 m	-19.1419	44.828	Malagasy	CASC, San Francisco, CA, USA	CASC
CASENT0424827	BLF04331	Pheidole	spinosa	Pheidole.MG150	3w.	pin	Fisher-Griswold Arthropod Team	2001-11-06	Mahajanga	Madagascar	50 m	-19.1419	44.828	Malagasy	CASC, San Francisco, CA, USA	CASC
CASENT0424831	BLF04331	Pheidole	spinosa	Pheidole.MGs122	1s.	pin	Fisher-Griswold Arthropod Team	2001-11-06	Mahajanga	Madagascar	50 m	-19.1419	44.828	Malagasy	CASC, San Francisco, CA, USA	CASC
CASENT0424832	BLF04331	Pheidole	spinosa	Pheidole.MGs128	2s.	pin	Fisher-Griswold Arthropod Team	2001-11-06	Mahajanga	Madagascar	50 m	-19.1419	44.828	Malagasy	CASC, San Francisco, CA, USA	CASC
CASENT0424879	BLF03617	Pheidole	spinosa	Pheidole.MG154	3w.	pin	Fisher, Griswold et al.	2001-04-02	Mahajanga	Madagascar	135 m	-16.2281	47.1436	Malagasy	CASC, San Francisco, CA, USA	CASC
CASENT0424886	BLF03617	Pheidole	spinosa	Pheidole.MGs128	3s.	pin	Fisher, Griswold et al.	2001-04-02	Mahajanga	Madagascar	135 m	-16.2281	47.1436	Malagasy	CASC, San Francisco, CA, USA	CASC
CASENT0424905	BLF03646	Pheidole	spinosa	Pheidole.MGs122	1s.	pin	Fisher, Griswold et al.	2001-04-02	Mahajanga	Madagascar	135 m	-16.2281	47.1436	Malagasy	CASC, San Francisco, CA, USA	CASC
CASENT0424906	BLF03646	Pheidole	spinosa	Pheidole.MGs128	1s.	pin	Fisher, Griswold et al.	2001-04-02	Mahajanga	Madagascar	135 m	-16.2281	47.1436	Malagasy	CASC, San Francisco, CA, USA	CASC
CASENT0424907	BLF03646	Pheidole	spinosa	Pheidole.MGs128	1s.	pin	Fisher, Griswold et al.	2001-04-02	Mahajanga	Madagascar	135 m	-16.2281	47.1436	Malagasy	CASC, San Francisco, CA, USA	CASC
CASENT0424908	BLF03646	Pheidole	spinosa	Pheidole.MG146	3w.	pin	Fisher, Griswold et al.	2001-04-02	Mahajanga	Madagascar	135 m	-16.2281	47.1436	Malagasy	CASC, San Francisco, CA, USA	CASC
CASENT0424912	BLF03646	Pheidole	spinosa	Pheidole.MG154	3w.	pin	Fisher, Griswold et al.	2001-04-02	Mahajanga	Madagascar	135 m	-16.2281	47.1436	Malagasy	CASC, San Francisco, CA, USA	CASC
CASENT0424913	BLF03603	Pheidole	spinosa	Pheidole.MGs128	1s.	pin	Fisher, Griswold et al.	2001-04-02	Mahajanga	Madagascar	135 m	-16.2281	47.1436	Malagasy	CASC, San Francisco, CA, USA	CASC
CASENT0424914	BLF03603	Pheidole	spinosa	Pheidole.MG154	3w.	pin	Fisher, Griswold et al.	2001-04-02	Mahajanga	Madagascar	135 m	-16.2281	47.1436	Malagasy	CASC, San Francisco, CA, USA	CASC
CASENT0424915	BLF03603	Pheidole	spinosa	Pheidole.MGs123	1s.	pin	Fisher, Griswold et al.	2001-04-02	Mahajanga	Madagascar	135 m	-16.2281	47.1436	Malagasy	CASC, San Francisco, CA, USA	CASC
CASENT0425106	BLF03616	Pheidole	spinosa	Pheidole.MG154	2w.	pin	Fisher, Griswold et al.	2001-04-02	Mahajanga	Madagascar	135 m	-16.2281	47.1436	Malagasy	CASC, San Francisco, CA, USA	CASC
CASENT0425113	BLF03616	Pheidole	spinosa	Pheidole.MGs123	1s.	pin	Fisher, Griswold et al.	2001-04-02	Mahajanga	Madagascar	135 m	-16.2281	47.1436	Malagasy	CASC, San Francisco, CA, USA	CASC
CASENT0425116	BLF03616	Pheidole	spinosa	Pheidole.MGs122	1s.	pin	Fisher, Griswold et al.	2001-04-02	Mahajanga	Madagascar	135 m	-16.2281	47.1436	Malagasy	CASC, San Francisco, CA, USA	CASC
CASENT0425277	BLF04365	Pheidole	spinosa	Pheidole.MGs122	1s.	pin	Fisher-Griswold Arthropod Team	2001-11-11	Mahajanga	Madagascar	100 m	-19.1322	44.8147	Malagasy	CASC, San Francisco, CA, USA	CASC
CASENT0425279	BLF04365	Pheidole	spinosa	Pheidole.MG154	1w.	pin	Fisher-Griswold Arthropod Team	2001-11-11	Mahajanga	Madagascar	100 m	-19.1322	44.8147	Malagasy	CASC, San Francisco, CA, USA	CASC
CASENT0425284	BLF04365	Pheidole	spinosa	Pheidole.MG150	3w.	pin	Fisher-Griswold Arthropod Team	2001-11-11	Mahajanga	Madagascar	100 m	-19.1322	44.8147	Malagasy	CASC, San Francisco, CA, USA	CASC
CASENT0426859	BLF06281	Pheidole	spinosa	Pheidole.MG154	1w.	pin	Fisher-Griswold Arthropod Team	2002-03-22	Toliara	Madagascar	90 m	-23.9922	43.8807	Malagasy	CASC, San Francisco, CA, USA	CASC
CASENT0427095	BLF06072	Pheidole	spinosa	Pheidole.MGs122	1s.	pin	Fisher-Griswold Arthropod Team	2002-03-12	Toliara	Madagascar	80 m	-22.2331	43.3663	Malagasy	CASC, San Francisco, CA, USA	CASC
CASENT0427099	BLF06072	Pheidole	spinosa	Pheidole.MG146	1w.	pin	Fisher-Griswold Arthropod Team	2002-03-12	Toliara	Madagascar	80 m	-22.2331	43.3663	Malagasy	CASC, San Francisco, CA, USA	CASC
CASENT0427131	BLF06072	Pheidole	spinosa	Pheidole.MGs120	1s.	pin	Fisher-Griswold Arthropod Team	2002-03-12	Toliara	Madagascar	80 m	-22.2331	43.3663	Malagasy	CASC, San Francisco, CA, USA	CASC
CASENT0427139	BLF06072	Pheidole	spinosa	Pheidole.MG147	1w.	pin	Fisher-Griswold Arthropod Team	2002-03-12	Toliara	Madagascar	80 m	-22.2331	43.3663	Malagasy	CASC, San Francisco, CA, USA	CASC
CASENT0427142	BLF06072	Pheidole	spinosa	Pheidole.MGs120	1s.	pin	Fisher-Griswold Arthropod Team	2002-03-12	Toliara	Madagascar	80 m	-22.2331	43.3663	Malagasy	CASC, San Francisco, CA, USA	CASC
CASENT0427173	BLF06256	Pheidole	spinosa	Pheidole.MG154	1w.	pin	Fisher-Griswold Arthropod Team	2002-03-22	Toliara	Madagascar	90 m	-23.9922	43.8807	Malagasy	CASC, San Francisco, CA, USA	CASC
CASENT0427254	BLF06256	Pheidole	spinosa	Pheidole.MG146	1w.	pin	Fisher-Griswold Arthropod Team	2002-03-22	Toliara	Madagascar	90 m	-23.9922	43.8807	Malagasy	CASC, San Francisco, CA, USA	CASC
CASENT0427289	BLF06256	Pheidole	spinosa	Pheidole.MG158	1w.	pin	Fisher-Griswold Arthropod Team	2002-03-22	Toliara	Madagascar	90 m	-23.9922	43.8807	Malagasy	CASC, San Francisco, CA, USA	CASC
CASENT0427491	BLF05649	Pheidole	spinosa	Pheidole.MG150	1w.	pin	Fisher-Griswold Arthropod Team	2002-02-13	Toliara	Madagascar	160 m	-25.5944	45.1468	Malagasy	CASC, San Francisco, CA, USA	CASC
CASENT0427633	BLF02654	Pheidole	spinosa	Pheidole.MGs123	1s.	pin	Fisher, Griswold et al.	2001-01-26	Antsiranana	Madagascar	325 m	-12.4689	49.2422	Malagasy	CASC, San Francisco, CA, USA	CASC
CASENT0427652	BLF02654	Pheidole	spinosa	Pheidole.MGs128	1s.	pin	Fisher, Griswold et al.	2001-01-26	Antsiranana	Madagascar	325 m	-12.4689	49.2422	Malagasy	CASC, San Francisco, CA, USA	CASC
CASENT0427658	BLF03021	Pheidole	spinosa	Pheidole.MG151	3w.	pin	Fisher, Griswold et al.	2001-02-16	Antsiranana	Madagascar	210 m	-12.8636	49.2258	Malagasy	CASC, San Francisco, CA, USA	CASC
CASENT0427660	BLF03021	Pheidole	spinosa	Pheidole.MGs128	3s.	pin	Fisher, Griswold et al.	2001-02-16	Antsiranana	Madagascar	210 m	-12.8636	49.2258	Malagasy	CASC, San Francisco, CA, USA	CASC
CASENT0427663	BLF03084	Pheidole	spinosa	Pheidole.MG151	2w.	pin	Fisher, Griswold et al.	2001-02-16	Antsiranana	Madagascar	210 m	-12.8636	49.2258	Malagasy	CASC, San Francisco, CA, USA	CASC
CASENT0427665	BLF03021	Pheidole	spinosa	Pheidole.MGs128	2s.	pin	Fisher, Griswold et al.	2001-02-16	Antsiranana	Madagascar	210 m	-12.8636	49.2258	Malagasy	CASC, San Francisco, CA, USA	CASC
CASENT0427667	BLF03084	Pheidole	spinosa	Pheidole.MGs122	2s.	pin	Fisher, Griswold et al.	2001-02-16	Antsiranana	Madagascar	210 m	-12.8636	49.2258	Malagasy	CASC, San Francisco, CA, USA	CASC
CASENT0427676	BLF03095	Pheidole	spinosa	Pheidole.MG146	3w.	pin	Fisher, Griswold et al.	2001-02-16	Antsiranana	Madagascar	210 m	-12.8636	49.2258	Malagasy	CASC, San Francisco, CA, USA	CASC
CASENT0427678	BLF03095	Pheidole	spinosa	Pheidole.MGs125	1s.	pin	Fisher, Griswold et al.	2001-02-16	Antsiranana	Madagascar	210 m	-12.8636	49.2258	Malagasy	CASC, San Francisco, CA, USA	CASC
CASENT0427687	BLF03022	Pheidole	spinosa	Pheidole.MG146	2w.	pin	Fisher, Griswold et al.	2001-02-16	Antsiranana	Madagascar	210 m	-12.8636	49.2258	Malagasy	CASC, San Francisco, CA, USA	CASC
CASENT0427700	BLF02668	Pheidole	spinosa	Pheidole.MG151	1w.	pin	Fisher, Griswold et al.	2001-01-26	Antsiranana	Madagascar	325 m	-12.4689	49.2422	Malagasy	CASC, San Francisco, CA, USA	CASC
CASENT0427713	BLF03345	Pheidole	spinosa	Pheidole.MG151	1w.	pin	Fisher, Griswold et al.	2001-03-11	Antsiranana	Madagascar	120 m	-14.3089	47.9143	Malagasy	CASC, San Francisco, CA, USA	CASC
CASENT0427717	BLF03345	Pheidole	spinosa	Pheidole.MGs122	1s.	pin	Fisher, Griswold et al.	2001-03-11	Antsiranana	Madagascar	120 m	-14.3089	47.9143	Malagasy	CASC, San Francisco, CA, USA	CASC
CASENT0427809	BLF02937	Pheidole	spinosa	Pheidole.MG151	3w.	pin	Fisher, Griswold et al.	2001-02-10	Antsiranana	Madagascar	80 m	-12.9089	49.1098	Malagasy	CASC, San Francisco, CA, USA	CASC
CASENT0427810	BLF02937	Pheidole	spinosa	Pheidole.MGs128	1s.	pin	Fisher, Griswold et al.	2001-02-10	Antsiranana	Madagascar	80 m	-12.9089	49.1098	Malagasy	CASC, San Francisco, CA, USA	CASC
CASENT0427845	BLF03429	Pheidole	spinosa	Pheidole.MG151	2w.	pin	Fisher, Griswold et al.	2001-03-19	Antsiranana	Madagascar	30 m	-13.4193	48.3312	Malagasy	CASC, San Francisco, CA, USA	CASC
CASENT0427849	BLF03429	Pheidole	spinosa	Pheidole.MGs122	3s.	pin	Fisher, Griswold et al.	2001-03-19	Antsiranana	Madagascar	30 m	-13.4193	48.3312	Malagasy	CASC, San Francisco, CA, USA	CASC
CASENT0427859	BLF03453	Pheidole	spinosa	Pheidole.MG151	2w.	pin	Fisher, Griswold et al.	2001-03-19	Antsiranana	Madagascar	30 m	-13.4193	48.3312	Malagasy	CASC, San Francisco, CA, USA	CASC
CASENT0427864	BLF03453	Pheidole	spinosa	Pheidole.MGs122	1s.	pin	Fisher, Griswold et al.	2001-03-19	Antsiranana	Madagascar	30 m	-13.4193	48.3312	Malagasy	CASC, San Francisco, CA, USA	CASC
CASENT0427866	BLF03453	Pheidole	spinosa	Pheidole.MGs122	2s.	pin	Fisher, Griswold et al.	2001-03-19	Antsiranana	Madagascar	30 m	-13.4193	48.3312	Malagasy	CASC, San Francisco, CA, USA	CASC
CASENT0427869	BLF03439	Pheidole	spinosa	Pheidole.MGs122	1s.	pin	Fisher, Griswold et al.	2001-03-19	Antsiranana	Madagascar	30 m	-13.4193	48.3312	Malagasy	CASC, San Francisco, CA, USA	CASC
CASENT0427873	BLF03439	Pheidole	spinosa	Pheidole.MG151	3w.	pin	Fisher, Griswold et al.	2001-03-19	Antsiranana	Madagascar	30 m	-13.4193	48.3312	Malagasy	CASC, San Francisco, CA, USA	CASC
CASENT0427896	BLF03254	Pheidole	spinosa	Pheidole.MG151	1w.	pin	Fisher, Griswold et al.	2001-03-04	Antsiranana	Madagascar	600 m	-13.7986	48.1617	Malagasy	CASC, San Francisco, CA, USA	CASC
CASENT0427918	BLF03426	Pheidole	spinosa	Pheidole.MGs122	1s.	pin	Fisher, Griswold et al.	2001-03-19	Antsiranana	Madagascar	30 m	-13.4193	48.3312	Malagasy	CASC, San Francisco, CA, USA	CASC
CASENT0430163	BLF03683	Pheidole	spinosa	Pheidole.MGs123	3s.	pin	Fisher, Griswold et al.	2001-04-09	Mahajanga	Madagascar	210 m	-16.2672	47.0486	Malagasy	CASC, San Francisco, CA, USA	CASC
CASENT0430164	BLF03683	Pheidole	spinosa	Pheidole.MGs128	1s.	pin	Fisher, Griswold et al.	2001-04-09	Mahajanga	Madagascar	210 m	-16.2672	47.0486	Malagasy	CASC, San Francisco, CA, USA	CASC
CASENT0430165	BLF03683	Pheidole	spinosa	Pheidole.MGs123	1s.	pin	Fisher, Griswold et al.	2001-04-09	Mahajanga	Madagascar	210 m	-16.2672	47.0486	Malagasy	CASC, San Francisco, CA, USA	CASC
CASENT0430168	BLF03683	Pheidole	spinosa	Pheidole.MGs128	1s.	pin	Fisher, Griswold et al.	2001-04-09	Mahajanga	Madagascar	210 m	-16.2672	47.0486	Malagasy	CASC, San Francisco, CA, USA	CASC
CASENT0430263	BLF04750	Pheidole	spinosa	Pheidole.MGs120	1s.	pin	Fisher-Griswold Arthropod Team	2001-12-06	Toliara	Madagascar	80 m	-20.7953	44.147	Malagasy	CASC, San Francisco, CA, USA	CASC
CASENT0430266	BLF04750	Pheidole	spinosa	Pheidole.MG147	1w.	pin	Fisher-Griswold Arthropod Team	2001-12-06	Toliara	Madagascar	80 m	-20.7953	44.147	Malagasy	CASC, San Francisco, CA, USA	CASC
CASENT0430479	BLF04263	Pheidole	spinosa	Pheidole.MG150	1w.	pin	Fisher-Griswold Arthropod Team	2001-11-06	Mahajanga	Madagascar	50 m	-19.1419	44.828	Malagasy	CASC, San Francisco, CA, USA	CASC
CASENT0430501	BLF04246	Pheidole	spinosa	Pheidole.MGs123	1s.	pin	Fisher-Griswold Arthropod Team	2001-11-06	Mahajanga	Madagascar	50 m	-19.1419	44.828	Malagasy	CASC, San Francisco, CA, USA	CASC
CASENT0430546	BLF04274	Pheidole	spinosa	Pheidole.MG150	1w.	pin	Fisher-Griswold Arthropod Team	2001-11-06	Mahajanga	Madagascar	50 m	-19.1419	44.828	Malagasy	CASC, San Francisco, CA, USA	CASC
CASENT0430588	BLF04290	Pheidole	spinosa	Pheidole.MG151	1w.	pin	Fisher-Griswold Arthropod Team	2001-11-06	Mahajanga	Madagascar	50 m	-19.1419	44.828	Malagasy	CASC, San Francisco, CA, USA	CASC
CASENT0430599	BLF04287	Pheidole	spinosa	Pheidole.MGs123	1s.	pin	Fisher-Griswold Arthropod Team	2001-11-06	Mahajanga	Madagascar	50 m	-19.1419	44.828	Malagasy	CASC, San Francisco, CA, USA	CASC
CASENT0430600	BLF04297	Pheidole	spinosa	Pheidole.MGs128	1s.	pin	Fisher-Griswold Arthropod Team	2001-11-06	Mahajanga	Madagascar	50 m	-19.1419	44.828	Malagasy	CASC, San Francisco, CA, USA	CASC
CASENT0430602	BLF04297	Pheidole	spinosa	Pheidole.MG154	1w.	pin	Fisher-Griswold Arthropod Team	2001-11-06	Mahajanga	Madagascar	50 m	-19.1419	44.828	Malagasy	CASC, San Francisco, CA, USA	CASC
CASENT0430604	BLF04297	Pheidole	spinosa	Pheidole.MG151	1w.	pin	Fisher-Griswold Arthropod Team	2001-11-06	Mahajanga	Madagascar	50 m	-19.1419	44.828	Malagasy	CASC, San Francisco, CA, USA	CASC
CASENT0430719	BLF06018	Pheidole	spinosa	Pheidole.MG150	1w.	pin	Fisher-Griswold Arthropod Team	2002-03-06	Toliara	Madagascar	70 m	-22.8022	43.4207	Malagasy	CASC, San Francisco, CA, USA	CASC
CASENT0430725	BLF06018	Pheidole	spinosa	Pheidole.MG150	1w.	pin	Fisher-Griswold Arthropod Team	2002-03-06	Toliara	Madagascar	70 m	-22.8022	43.4207	Malagasy	CASC, San Francisco, CA, USA	CASC
CASENT0431982	BLF03599	Pheidole	spinosa	Pheidole.MG147	1w.	pin	Fisher, Griswold et al.	2001-04-02	Mahajanga	Madagascar	135 m	-16.2281	47.1436	Malagasy	CASC, San Francisco, CA, USA	CASC
CASENT0432011	BLF03599	Pheidole	spinosa	Pheidole.MG150	1w.	pin	Fisher, Griswold et al.	2001-04-02	Mahajanga	Madagascar	135 m	-16.2281	47.1436	Malagasy	CASC, San Francisco, CA, USA	CASC
CASENT0432017	BLF03599	Pheidole	spinosa	Pheidole.MG146	1w.	pin	Fisher, Griswold et al.	2001-04-02	Mahajanga	Madagascar	135 m	-16.2281	47.1436	Malagasy	CASC, San Francisco, CA, USA	CASC
CASENT0432020	BLF03599	Pheidole	spinosa	Pheidole.MG148	1w.	pin	Fisher, Griswold et al.	2001-04-02	Mahajanga	Madagascar	135 m	-16.2281	47.1436	Malagasy	CASC, San Francisco, CA, USA	CASC
CASENT0432024	BLF03599	Pheidole	spinosa	Pheidole.MGs128	1s.	pin	Fisher, Griswold et al.	2001-04-02	Mahajanga	Madagascar	135 m	-16.2281	47.1436	Malagasy	CASC, San Francisco, CA, USA	CASC
CASENT0432043	BLF03599	Pheidole	spinosa	Pheidole.MG155	1w.	pin	Fisher, Griswold et al.	2001-04-02	Mahajanga	Madagascar	135 m	-16.2281	47.1436	Malagasy	CASC, San Francisco, CA, USA	CASC
CASENT0432044	BLF03599	Pheidole	spinosa	Pheidole.MG155	1w.	pin	Fisher, Griswold et al.	2001-04-02	Mahajanga	Madagascar	135 m	-16.2281	47.1436	Malagasy	CASC, San Francisco, CA, USA	CASC
CASENT0432064	BLF03599	Pheidole	spinosa	Pheidole.MGs132	1s.	pin	Fisher, Griswold et al.	2001-04-02	Mahajanga	Madagascar	135 m	-16.2281	47.1436	Malagasy	CASC, San Francisco, CA, USA	CASC
CASENT0432068	BLF03599	Pheidole	spinosa	Pheidole.MG151	1w.	pin	Fisher, Griswold et al.	2001-04-02	Mahajanga	Madagascar	135 m	-16.2281	47.1436	Malagasy	CASC, San Francisco, CA, USA	CASC
CASENT0432096	BLF03599	Pheidole	spinosa	Pheidole.MGs123	1s.	pin	Fisher, Griswold et al.	2001-04-02	Mahajanga	Madagascar	135 m	-16.2281	47.1436	Malagasy	CASC, San Francisco, CA, USA	CASC
CASENT0432127	BLF03599	Pheidole	spinosa	Pheidole.MG154	1w.	pin	Fisher, Griswold et al.	2001-04-02	Mahajanga	Madagascar	135 m	-16.2281	47.1436	Malagasy	CASC, San Francisco, CA, USA	CASC
CASENT0432239	BLF03599	Pheidole	spinosa	Pheidole.MGs123	1s.	pin	Fisher, Griswold et al.	2001-04-02	Mahajanga	Madagascar	135 m	-16.2281	47.1436	Malagasy	CASC, San Francisco, CA, USA	CASC
CASENT0437353	BLF03552	Pheidole	spinosa	Pheidole.MG154	1w.	pin	Fisher, Griswold et al.	2001-03-26	Mahajanga	Madagascar	130 m	-16.3208	46.8107	Malagasy	CASC, San Francisco, CA, USA	CASC
CASENT0437357	BLF03552	Pheidole	spinosa	Pheidole.MGs128	1s.	pin	Fisher, Griswold et al.	2001-03-26	Mahajanga	Madagascar	130 m	-16.3208	46.8107	Malagasy	CASC, San Francisco, CA, USA	CASC
CASENT0437387	BLF03528	Pheidole	spinosa	Pheidole.MG154	1w.	pin	Fisher, Griswold et al.	2001-03-26	Mahajanga	Madagascar	130 m	-16.3208	46.8107	Malagasy	CASC, San Francisco, CA, USA	CASC
CASENT0437391	BLF03528	Pheidole	spinosa	Pheidole.MGs128	1s.	pin	Fisher, Griswold et al.	2001-03-26	Mahajanga	Madagascar	130 m	-16.3208	46.8107	Malagasy	CASC, San Francisco, CA, USA	CASC
CASENT0437393	BLF03528	Pheidole	spinosa	Pheidole.MGs132	1s.	pin	Fisher, Griswold et al.	2001-03-26	Mahajanga	Madagascar	130 m	-16.3208	46.8107	Malagasy	CASC, San Francisco, CA, USA	CASC
CASENT0437394	BLF03528	Pheidole	spinosa	Pheidole.MGs123	1s.	pin	Fisher, Griswold et al.	2001-03-26	Mahajanga	Madagascar	130 m	-16.3208	46.8107	Malagasy	CASC, San Francisco, CA, USA	CASC
CASENT0438596	BLF05858	Pheidole	spinosa	Pheidole.MG150	1w.	pin	Fisher-Griswold Arthropod Team	2002-02-27	Toliara	Madagascar	75 m	-23.5242	44.1213	Malagasy	CASC, San Francisco, CA, USA	CASC
CASENT0439000	BLF02858	Pheidole	spinosa	Pheidole.MG150	1w.	pin	Fisher, Griswold et al.	2001-02-10	Antsiranana	Madagascar	80 m	-12.9089	49.1098	Malagasy	CASC, San Francisco, CA, USA	CASC
CASENT0439038	BLF02858	Pheidole	spinosa	Pheidole.MGs122	1s.	pin	Fisher, Griswold et al.	2001-02-10	Antsiranana	Madagascar	80 m	-12.9089	49.1098	Malagasy	CASC, San Francisco, CA, USA	CASC
CASENT0439047	BLF02858	Pheidole	spinosa	Pheidole.MG154	1w.	pin	Fisher, Griswold et al.	2001-02-10	Antsiranana	Madagascar	80 m	-12.9089	49.1098	Malagasy	CASC, San Francisco, CA, USA	CASC
CASENT0439087	BLF02858	Pheidole	spinosa	Pheidole.MGs123	1s.	pin	Fisher, Griswold et al.	2001-02-10	Antsiranana	Madagascar	80 m	-12.9089	49.1098	Malagasy	CASC, San Francisco, CA, USA	CASC
CASENT0439143	BLF02858	Pheidole	spinosa	Pheidole.MGs128	1s.	pin	Fisher, Griswold et al.	2001-02-10	Antsiranana	Madagascar	80 m	-12.9089	49.1098	Malagasy	CASC, San Francisco, CA, USA	CASC
CASENT0439147	BLF02858	Pheidole	spinosa	Pheidole.MG151	1w.	pin	Fisher, Griswold et al.	2001-02-10	Antsiranana	Madagascar	80 m	-12.9089	49.1098	Malagasy	CASC, San Francisco, CA, USA	CASC
CASENT0439579	BLF06131	Pheidole	spinosa	Pheidole.MGs122	1s.	pin	Fisher-Griswold Arthropod Team	2002-03-12	Toliara	Madagascar	80 m	-22.2331	43.3663	Malagasy	CASC, San Francisco, CA, USA	CASC
CASENT0439588	BLF06131	Pheidole	spinosa	Pheidole.MG147	1w.	pin	Fisher-Griswold Arthropod Team	2002-03-12	Toliara	Madagascar	80 m	-22.2331	43.3663	Malagasy	CASC, San Francisco, CA, USA	CASC
CASENT0439593	BLF06131	Pheidole	spinosa	Pheidole.MG155	1w.	pin	Fisher-Griswold Arthropod Team	2002-03-12	Toliara	Madagascar	80 m	-22.2331	43.3663	Malagasy	CASC, San Francisco, CA, USA	CASC
CASENT0439595	BLF06131	Pheidole	spinosa	Pheidole.MG154	1w.	pin	Fisher-Griswold Arthropod Team	2002-03-12	Toliara	Madagascar	80 m	-22.2331	43.3663	Malagasy	CASC, San Francisco, CA, USA	CASC
CASENT0440608	BLF03012	Pheidole	spinosa	Pheidole.MGs128	1s.	pin	Fisher, Griswold et al.	2001-02-16	Antsiranana	Madagascar	210 m	-12.8636	49.2258	Malagasy	CASC, San Francisco, CA, USA	CASC
CASENT0440623	BLF03012	Pheidole	spinosa	Pheidole.MGs122	1s.	pin	Fisher, Griswold et al.	2001-02-16	Antsiranana	Madagascar	210 m	-12.8636	49.2258	Malagasy	CASC, San Francisco, CA, USA	CASC
CASENT0440654	BLF03012	Pheidole	spinosa	Pheidole.MG151	1w.	pin	Fisher, Griswold et al.	2001-02-16	Antsiranana	Madagascar	210 m	-12.8636	49.2258	Malagasy	CASC, San Francisco, CA, USA	CASC
CASENT0440807	BLF03012	Pheidole	spinosa	Pheidole.MG154	1w.	pin	Fisher, Griswold et al.	2001-02-16	Antsiranana	Madagascar	210 m	-12.8636	49.2258	Malagasy	CASC, San Francisco, CA, USA	CASC
CASENT0441017	BLF04811	Pheidole	spinosa	Pheidole.MG154	1w.	pin	Fisher-Griswold Arthropod Team	2002-01-12	Toliara	Madagascar	150 m	-24.8169	46.61	Malagasy	CASC, San Francisco, CA, USA	CASC
CASENT0441018	BLF04603	Pheidole	spinosa	Pheidole.MG154	1w.	pin	Fisher-Griswold Arthropod Team	2001-11-28	Toliara	Madagascar	100 m	-20.045	44.6622	Malagasy	CASC, San Francisco, CA, USA	CASC
CASENT0441019	BLF04603	Pheidole	spinosa	Pheidole.MG154	1w.	pin	Fisher-Griswold Arthropod Team	2001-11-28	Toliara	Madagascar	100 m	-20.045	44.6622	Malagasy	CASC, San Francisco, CA, USA	CASC
CASENT0441021	BLF05504	Pheidole	spinosa	Pheidole.MG154	1w.	pin	Fisher-Griswold Arthropod Team	2002-02-11	Toliara	Madagascar	200 m	-25.5817	45.1683	Malagasy	CASC, San Francisco, CA, USA	CASC
CASENT0441023	BLF06067	Pheidole	spinosa	Pheidole.MG147	1w.	pin	Fisher-Griswold Arthropod Team	2002-03-12	Toliara	Madagascar	80 m	-22.2331	43.3663	Malagasy	CASC, San Francisco, CA, USA	CASC
CASENT0441033	BLF06067	Pheidole	spinosa	Pheidole.MG154	1w.	pin	Fisher-Griswold Arthropod Team	2002-03-12	Toliara	Madagascar	80 m	-22.2331	43.3663	Malagasy	CASC, San Francisco, CA, USA	CASC
CASENT0441035	BLF06159	Pheidole	spinosa	Pheidole.MG154	1w.	pin	Fisher-Griswold Arthropod Team	2002-03-18	Toliara	Madagascar	40 m	-24.0472	43.7532	Malagasy	CASC, San Francisco, CA, USA	CASC
CASENT0441036	BLF06159	Pheidole	spinosa	Pheidole.MG158	1w.	pin	Fisher-Griswold Arthropod Team	2002-03-18	Toliara	Madagascar	40 m	-24.0472	43.7532	Malagasy	CASC, San Francisco, CA, USA	CASC
CASENT0441037	BLF06257	Pheidole	spinosa	Pheidole.MG158	1w.	pin	Fisher-Griswold Arthropod Team	2002-03-22	Toliara	Madagascar	90 m	-23.9922	43.8807	Malagasy	CASC, San Francisco, CA, USA	CASC
CASENT0441142	BLF07302	Pheidole	spinosa	Pheidole.MG154	1w.	pin	Fisher, Griswold et al.	2003-01-27	Fianarantsoa	Madagascar	725 m	-22.4817	45.4617	Malagasy	CASC, San Francisco, CA, USA	CASC
CASENT0441171	BLF07302	Pheidole	spinosa	Pheidole.megacephala spinosa	1w.	pin	Fisher, Griswold et al.	2003-01-27	Fianarantsoa	Madagascar	725 m	-22.4817	45.4617	Malagasy	CASC, San Francisco, CA, USA	CASC
CASENT0441174	BLF07302	Pheidole	spinosa	Pheidole.megacephala spinosa	1w.	pin	Fisher, Griswold et al.	2003-01-27	Fianarantsoa	Madagascar	725 m	-22.4817	45.4617	Malagasy	CASC, San Francisco, CA, USA	CASC
CASENT0441176	BLF07302	Pheidole	spinosa	Pheidole.MG148	1w.	pin	Fisher, Griswold et al.	2003-01-27	Fianarantsoa	Madagascar	725 m	-22.4817	45.4617	Malagasy	CASC, San Francisco, CA, USA	CASC
CASENT0441185	BLF07302	Pheidole	spinosa	Pheidole.MGs123	1s.	pin	Fisher, Griswold et al.	2003-01-27	Fianarantsoa	Madagascar	725 m	-22.4817	45.4617	Malagasy	CASC, San Francisco, CA, USA	CASC
CASENT0441215	BLF03012	Pheidole	spinosa	Pheidole.MG150	1w.	pin	Fisher, Griswold et al.	2001-02-16	Antsiranana	Madagascar	210 m	-12.8636	49.2258	Malagasy	CASC, San Francisco, CA, USA	CASC
CASENT0441217	BLF03012	Pheidole	spinosa	Pheidole.MGs122	1s.	pin	Fisher, Griswold et al.	2001-02-16	Antsiranana	Madagascar	210 m	-12.8636	49.2258	Malagasy	CASC, San Francisco, CA, USA	CASC
CASENT0441746	BLF04490	Pheidole	spinosa	Pheidole.MG154	1w.	pin	Fisher-Griswold Arthropod Team	2001-11-16	Mahajanga	Madagascar	150 m	-18.7094	44.7182	Malagasy	CASC, San Francisco, CA, USA	CASC
CASENT0442351	BLF05423	Pheidole	spinosa	Pheidole.MG154	1w.	pin	Fisher-Griswold Arthropod Team	2002-02-06	Toliara	Madagascar	40 m	-25.0078	46.306	Malagasy	CASC, San Francisco, CA, USA	CASC
CASENT0442369	BLF05440	Pheidole	spinosa	Pheidole.MG155	1w.	pin	Fisher-Griswold Arthropod Team	2002-02-06	Toliara	Madagascar	40 m	-25.0078	46.306	Malagasy	CASC, San Francisco, CA, USA	CASC
CASENT0442370	BLF05440	Pheidole	spinosa	Pheidole.MG147	1w.	pin	Fisher-Griswold Arthropod Team	2002-02-06	Toliara	Madagascar	40 m	-25.0078	46.306	Malagasy	CASC, San Francisco, CA, USA	CASC
CASENT0442372	BLF05440	Pheidole	spinosa	Pheidole.MGs120	1s.	pin	Fisher-Griswold Arthropod Team	2002-02-06	Toliara	Madagascar	40 m	-25.0078	46.306	Malagasy	CASC, San Francisco, CA, USA	CASC
CASENT0442373	BLF05440	Pheidole	spinosa	Pheidole.MGs122	1s.	pin	Fisher-Griswold Arthropod Team	2002-02-06	Toliara	Madagascar	40 m	-25.0078	46.306	Malagasy	CASC, San Francisco, CA, USA	CASC
CASENT0442411	BLF05418	Pheidole	spinosa	Pheidole.MGs128	1s.	pin	Fisher-Griswold Arthropod Team	2002-02-06	Toliara	Madagascar	40 m	-25.0078	46.306	Malagasy	CASC, San Francisco, CA, USA	CASC
CASENT0442412	BLF05418	Pheidole	spinosa	Pheidole.MGs132	1s.	pin	Fisher-Griswold Arthropod Team	2002-02-06	Toliara	Madagascar	40 m	-25.0078	46.306	Malagasy	CASC, San Francisco, CA, USA	CASC
CASENT0442413	BLF05418	Pheidole	spinosa	Pheidole.MGs122	1s.	pin	Fisher-Griswold Arthropod Team	2002-02-06	Toliara	Madagascar	40 m	-25.0078	46.306	Malagasy	CASC, San Francisco, CA, USA	CASC
CASENT0442420	BLF05418	Pheidole	spinosa	Pheidole.MG154	1w.	pin	Fisher-Griswold Arthropod Team	2002-02-06	Toliara	Madagascar	40 m	-25.0078	46.306	Malagasy	CASC, San Francisco, CA, USA	CASC
CASENT0442434	BLF05438	Pheidole	spinosa	Pheidole.MG154	1w.	pin	Fisher-Griswold Arthropod Team	2002-02-06	Toliara	Madagascar	40 m	-25.0078	46.306	Malagasy	CASC, San Francisco, CA, USA	CASC
CASENT0442441	BLF05438	Pheidole	spinosa	Pheidole.MGs122	1s.	pin	Fisher-Griswold Arthropod Team	2002-02-06	Toliara	Madagascar	40 m	-25.0078	46.306	Malagasy	CASC, San Francisco, CA, USA	CASC
[truncated: 579 more rows]
