# Supplementary material for: Taxonomic revision of the Pheidole megacephala species-group (Hymenoptera, Formicidae) from the Malagasy Region
Source: PeerJ. 2022 Apr 26;10:e13263. doi: 10.7717/peerj.13263 (PMC9053301; doi:10.7717/peerj.13263)
Supplement: Supplemental Information 4 — Morphometric characters of worker individuals of Pheidole spinosa. Data are given in mm [file peerj-10-13263-s004.xlsx]

## Sheet: Arkusz1
CASENT	GENUS	SPECIES	CASTE	HL	HW	SL	EL	WL	PSL	MTL	PNW	PTW	PPW
CASENT0496918	Pheidole	spinosa	major worker	1.377	1.336	0.756	0.175	1.062	0.211	0.748	0.64	0.194	0.339
CASENT0496918	Pheidole	spinosa	major worker	1.432	1.358	0.748	0.178	1.069	0.195	0.764	0.631	0.217	0.325
CASENT0496918	Pheidole	spinosa	major worker	1.445	1.381	0.784	0.167	1.108	0.217	0.775	0.679	0.21	0.313
CASENT0490911	Pheidole	spinosa	major worker	1.749	1.771	0.83	0.187	1.279	0.267	0.9	0.812	0.219	0.421
CASENT0490911	Pheidole	spinosa	major worker	1.857	1.881	0.826	0.222	1.351	0.275	0.919	0.854	0.258	0.46
CASENT0490911	Pheidole	spinosa	major worker	1.723	1.756	0.845	0.197	1.29	0.268	0.891	0.787	0.228	0.405
CASENT0490912	Pheidole	spinosa	major worker	1.743	1.746	0.83	0.203	1.248	0.244	0.877	0.786	0.243	0.417
CASENT0490912	Pheidole	spinosa	major worker	1.834	1.819	0.82	0.214	1.32	0.265	0.904	0.856	0.223	0.464
CASENT0490912	Pheidole	spinosa	major worker	1.736	1.769	0.797	0.209	1.279	0.279	0.878	0.799	0.256	0.466
CASENT0109737	Pheidole	spinosa	major worker	1.556	1.541	0.775	0.199	1.223	0.216	0.828	0.695	0.215	0.407
CASENT0454246	Pheidole	spinosa	major worker	1.733	1.642	0.792	0.182	1.263	0.252	0.836	0.768	0.208	0.426
CASENT0454246	Pheidole	spinosa	major worker	1.939	1.978	0.842	0.213	1.292	0.24	0.931	0.857	0.221	0.498
CASENT0454246	Pheidole	spinosa	major worker	1.777	1.738	0.786	0.198	1.279	0.258	0.85	0.825	0.242	0.417
CASENT0149640	Pheidole	spinosa	major worker	1.338	1.277	0.751	0.174	1.096	0.19	0.736	0.631	0.188	0.324
CASENT0206153	Pheidole	spinosa	major worker	1.356	1.245	0.658	0.149	1.036	0.19	0.673	0.659	0.163	0.347
CASENT0124909	Pheidole	spinosa	major worker	1.263	1.203	0.59	0.168	1.058	0.175	0.651	0.659	0.2	0.35
CASENT0232627	Pheidole	spinosa	major worker	1.458	1.427	0.692	0.169	1.214	0.23	0.774	0.756	0.231	0.377
CASENT0168343	Pheidole	spinosa	major worker	1.282	1.312	0.707	0.175	1.116	0.206	0.753	0.662	0.178	0.292
CASENT0232639	Pheidole	spinosa	major worker	1.438	1.38	0.756	0.168	1.14	0.222	0.741	0.692	0.196	0.373
CASENT0122716	Pheidole	spinosa	major worker	1.161	1.112	0.674	0.163	1.002	0.175	0.64	0.617	0.182	0.326
CASENT0109737	Pheidole	spinosa	minor worker	0.67	0.587	0.763	0.133	0.844	0.105	0.635	0.395	0.09	0.188
CASENT0490916	Pheidole	spinosa	minor worker	0.714	0.655	0.794	0.136	0.905	0.099	0.639	0.427	0.113	0.2
CASENT0490916	Pheidole	spinosa	minor worker	0.74	0.671	0.778	0.143	0.922	0.135	0.674	0.446	0.1	0.193
CASENT0490916	Pheidole	spinosa	minor worker	0.706	0.651	0.805	0.132	0.883	0.119	0.644	0.421	0.108	0.193
CASENT0490915	Pheidole	spinosa	minor worker	0.686	0.629	0.787	0.153	0.902	0.109	0.663	0.413	0.112	0.212
CASENT0490915	Pheidole	spinosa	minor worker	0.728	0.651	0.81	0.145	0.917	0.116	0.642	0.409	0.108	0.185
CASENT0490915	Pheidole	spinosa	minor worker	0.747	0.654	0.816	0.143	0.877	0.129	0.641	0.42	0.11	0.194
CASENT0490914	Pheidole	spinosa	minor worker	0.745	0.686	0.825	0.123	0.923	0.132	0.681	0.444	0.112	0.205
CASENT0490914	Pheidole	spinosa	minor worker	0.767	0.675	0.828	0.143	0.932	0.146	0.667	0.444	0.098	0.199
CASENT0490914	Pheidole	spinosa	minor worker	0.747	0.665	0.823	0.122	0.92	0.143	0.657	0.449	0.11	0.197
CASENT0490914	Pheidole	spinosa	minor worker	0.754	0.66	0.832	0.135	0.891	0.11	0.669	0.437	0.105	0.187
CASENT0149640	Pheidole	spinosa	minor worker	0.622	0.538	0.728	0.116	0.803	0.112	0.55	0.353	0.089	0.159
CASENT0206153	Pheidole	spinosa	minor worker	0.637	0.577	0.652	0.135	0.713	0.104	0.51	0.388	0.127	0.2
CASENT0232627	Pheidole	spinosa	minor worker	0.669	0.595	0.671	0.135	0.781	0.115	0.548	0.378	0.107	0.181
CASENT0168343	Pheidole	spinosa	minor worker	0.659	0.555	0.653	0.12	0.733	0.107	0.506	0.367	0.077	0.155
CASENT0232639	Pheidole	spinosa	minor worker	0.659	0.603	0.658	0.128	0.793	0.123	0.533	0.384	0.109	0.176
CASENT0454244	Pheidole	spinosa	minor worker	0.649	0.549	0.71	0.14	0.78	0.099	0.544	0.346	0.083	0.157
CASENT0454244	Pheidole	spinosa	minor worker	0.743	0.678	0.809	0.148	0.924	0.142	0.627	0.418	0.106	0.18
CASENT0454244	Pheidole	spinosa	minor worker	0.697	0.605	0.751	0.138	0.819	0.117	0.597	0.408	0.097	0.176
CASENT0447605	Pheidole	spinosa	minor worker	0.549	0.451	0.619	0.11	0.688	0.073	0.47	0.303	0.077	0.126
